# Supplementary material for: Genome-wide evaluation of the effect of short tandem repeat variation on local DNA methylation
Source: HighWire-hosted journal article supplement (doi:10.1101/gr.277057.122), 2022-12-28
Supplement: Supplemental_Code.zip [file README.docx]

| CAVIAR_example.script.sh | Example of CAVIAR script |
| --- | --- |
| **STRgenotype.hipstr** | Script for generating STR genotypes from cram files using HipSTR |
| **ExtractingFilteredSTRGenotypesFromVCF.sh** | Script for extracting STR genotypes from VCF file generated by HipSTR |
| QualityControl.DNAmetylation.R | Script for performing quality control of DNA methylation measurements |
| computingLD_perSTR.R | Script for computing LD structure between STR and SNV genotypes |
| computingVst.R | Script for computing Vst metric |
| extractingresiduals.DNAmethylation.R | Script for extracting residuals obtained from adjusting DNA methylation measurements for covariates |
| mappingMethylationSTRs.R | Script for DNA methylation QTL mapping using STR genotypes |
| mappingMethylationSTRs.filtering.R | Script for filtering step of identified mSTRs |
|  |  |
|  |  |
