# Supplementary material for: Genome-wide evaluation of the effect of short tandem repeat variation on local DNA methylation
Source: HighWire-hosted journal article supplement (doi:10.1101/gr.277057.122), 2022-12-28
Supplement: Supplemental_Table_S1.xlsx [file Supplemental_Table_S1.xlsx]

## Sheet: ST1 - Significant STR CpG pairs
ST1. List of significant STR:CpG pairwise associations
	STR																CpGs								Discovery analsyis STR:CpG pairwise association						Replication analysis STR:CpG pairwise association
STR coordinates, hg38	Length motif (bp)	Motif	# copies in HipSTR catalog	# observed STR alleles	Observed STR alleles	minimum # copies observed allele STR	25th perc. # copies observed allele STR	Median # copies observed allele STR	75th perc. # copies observed allele STR	Maximum # copies observed allele STR	Gene Promoter (TSS±2kb)	Gene Body	Closest Gene	Distance to Closest Gene (bp)	Refseq GenomicFeature		ProbeID	MapInfo,hg38	Distance from CpG to midpoint STR (bp)	Gene Promoter (TSS±2kb)	Gene Body	Closes Gene	CpGisland		# paired observations	Slope	r2 correlation coefficient	P-value	Bonferroni adjusted P-value		Validatioon replication	r replication	Bonferroni corrected replication	r2 correlation coefficient
chr9:99486541-99486574	2	GT	20	6	23,22,21,20,19,18	18	19	20	20	23	.	.	LOC101928438	99212	.		cg27334928	chr9:99515298	28740.5	.	.	LOC101928438	.		244	-0.118523	0.26567	5.829e-18	1.13879e-11		1	-0.602412	3.59663e-41	0.3629
chr9:99470344-99470374	2	AC	18	7	21,20,19,18,17,16,15	15	16	19	19	21	.	.	NAMA	95088	.		cg27334928	chr9:99515298	44939	.	.	LOC101928438	.		243	-0.064653	0.60328	2.7296e-50	5.33274e-44		1	-0.833535	1.03037e-118	0.69478
chr9:99468114-99468146	5	GTTTT	7	4	8,7,6,3	3	6	7	7	8	.	.	NAMA	92858	.		cg27334928	chr9:99515298	47168	.	.	LOC101928438	.		244	-0.068847	0.30018	1.6228e-20	3.17042e-14		1	-0.653253	4.4446e-53	0.42674
chr9:987413-987457	2	GT	23	14	26,25,24,23,22,21,20,19,18,17,16,15,13,10	10	16	16	17	26	.	DMRT3	DMRT3	0	DMRT3_intron		cg21547364	chr9:998533	11098	.	.	DMRT3	CpG:_48_Island		218	-0.033613	0.41343	7.975e-27	1.55805e-20		0	0	0	0
chr9:98335665-98335689	3	AAC	8	3	9,8,7	7	7	8	8	9	.	GABBR2	GABBR2	0	GABBR2_intron		cg02999834	chr9:98332904	-2773	.	GABBR2	GABBR2	.		245	0.041647	0.16906	2.0596e-11	4.02378e-05		1	0.628594	7.44362e-48	0.39513
chr9:98335665-98335689	3	AAC	8	3	9,8,7	7	7	8	8	9	.	GABBR2	GABBR2	0	GABBR2_intron		cg03251602	chr9:98324601	-11076	.	GABBR2	GABBR2	.		245	0.106201	0.45338	1.0164e-33	1.98571e-27		1	0.687052	5.21545e-62	0.47204
chr9:98324494-98324542	2	AC	25	15	29,28,27,26,25,24,23,22,21,20,19,18,17,16,15	15	15	23	24	29	.	GABBR2	GABBR2	0	GABBR2_intron		cg03251602	chr9:98324601	83	.	GABBR2	GABBR2	.		244	0.00741	0.16131	7.1188e-11	0.000139078		1	0.473138	5.05787e-21	0.22386
chr9:98318892-98318946	2	GT	28	8	32,31,30,29,28,27,26,25	25	28	28	30	32	.	GABBR2	GABBR2	0	GABBR2_intron		cg03251602	chr9:98324601	5682	.	GABBR2	GABBR2	.		245	-0.030198	0.19983	1.9406e-13	3.79129e-07		1	-0.535929	1.03502e-29	0.28722
chr9:98194287-98194312	4	AAAC	7	3	8,7,6	6	6	7	7	8	CORO2A	.	CORO2A	1651	.		cg25842181	chr9:98182993	-11306.5	.	CORO2A	CORO2A	.		244	0.056714	0.18544	1.9479e-12	3.80555e-06		1	0.570096	1.33937e-36	0.32501
chr9:98194287-98194312	4	AAAC	7	3	8,7,6	6	6	7	7	8	CORO2A	.	CORO2A	1651	.		cg13704599	chr9:98181702	-12597.5	.	CORO2A	CORO2A	.		243	0.078431	0.30833	4.6736e-21	9.13067e-15		1	0.643032	2.68837e-51	0.41349
chr9:98142835-98142889	5	CCCTG	12	3	12,10,9	9	10	12	12	12	.	CORO2A	CORO2A	0	CORO2A_intron		cg06367454	chr9:98142865	3	.	CORO2A	CORO2A	.		245	0.06459	0.30977	2.4967e-21	4.87773e-15		1	0.360777	2.5169e-09	0.13016
chr9:98053803-98053835	4	AAAT	8	7	13,12,11,10,9,8,7	7	8	10	12	13	.	.	NANS	2897	.		cg08271803	chr9:98074603	20784	.	.NS	.NS	.		245	-0.020886	0.20566	7.8761e-14	1.53873e-07		1	-0.448096	1.07934e-18	0.20079
chr9:98031163-98031217	2	AC	28	9	33,32,31,30,29,28,27,26,25	25	28	28	30	33	.	.	ANP32B	15222	.		cg08271803	chr9:98074603	43413	.	.NS	.NS	.		245	-0.030469	0.15748	1.1465e-10	0.000223988		1	-0.484531	3.22276e-23	0.23477
chr9:97927169-97927199	2	AC	16	8	17,16,15,14,13,12,11,10	10	12	15	16	17	.	HEMGN	HEMGN	0	HEMGN_3utr		cg11909250	chr9:97938635	11451	HEMGN	HEMGN	HEMGN	.		245	0.022039	0.21114	3.3561e-14	6.55671e-08		1	0.680088	3.34608e-59	0.46252
chr9:97927169-97927199	2	AC	16	8	17,16,15,14,13,12,11,10	10	12	15	16	17	.	HEMGN	HEMGN	0	HEMGN_3utr		cg11093459	chr9:97938859	11675	HEMGN	HEMGN	HEMGN	.		245	0.026024	0.62995	2.25e-54	4.39576e-48		1	0.867756	1.60132e-138	0.753
chr9:97899431-97899455	4	ATTT	8	5	12,11,10,9,8	8	8	9	9	12	.	.	TRMO	5034	.		cg11093459	chr9:97938859	39416	HEMGN	HEMGN	HEMGN	.		245	-0.023492	0.1481	4.5303e-10	0.000885071		1	-0.482027	6.88712e-23	0.23235
chr9:97352115-97352146	3	AAC	12	5	15,14,13,12,11	11	12	12	13	15	.	CCDC180,SUGT1P4-STRA6LP-CCDC180	SUGT1P4-STRA6LP-CCDC180,CCDC180	0	CCDC180_intron,SUGT1P4-STRA6LP-CCDC180_intron		cg06809438	chr9:97306869	-45261.5	CCDC180	LOC100499484-C9ORF174	LOC100499484-C9ORF174	CpG:_37_Shore_N		244	0.040505	0.22562	3.8918e-15	7.60329e-09		1	0.351269	4.0124e-09	0.12339
chr9:97195267-97195296	3	AAT	11	4	13,12,11,10	10	10	11	11	13	.	ANKRD18CP	ANKRD18CP	0	ANKRD18CP_intron		cg04399443	chr9:97198394	3112.5	.	.	LOC100499484,LOC100499484-C9ORF174	CpG:_23_Shore_N		238	0.331898	0.36687	3.2036e-25	6.25878e-19		1	0.494358	1.02011e-24	0.24439
chr9:97172497-97172521	4	AAAT	6	3	8,7,6	6	6	6	7	8	.	ANKRD18CP	ANKRD18CP	0	ANKRD18CP_intron		cg04399443	chr9:97198394	25885	.	.	LOC100499484,LOC100499484-C9ORF174	CpG:_23_Shore_N		238	0.244161	0.21036	8.7864e-14	1.71657e-07		1	0.354528	2.27241e-09	0.12569
chr9:96075466-96075490	4	GTTT	6	3	7,6,5	5	5	6	6	7	.	LOC158435	LOC158435	0	LOC158435_intron		cg14508093	chr9:96100543	25065	.	LOC158435	LOC158435	.		242	0.098312	0.15885	1.221e-10	0.000238543		1	0.432076	8.84751e-17	0.18669
chr9:96075466-96075490	4	GTTT	6	3	7,6,5	5	5	6	6	7	.	LOC158435	LOC158435	0	LOC158435_intron		cg10623728	chr9:96117645	42167	LOC158434	.	LOC158434	.		245	-0.063964	0.26943	2.6509e-18	5.17898e-12		1	-0.360222	7.85625e-10	0.12976
chr9:96075466-96075490	4	GTTT	6	3	7,6,5	5	5	6	6	7	.	LOC158435	LOC158435	0	LOC158435_intron		cg03249723	chr9:96117775	42297	LOC158434	.	LOC158434	.		234	-0.314345	0.30447	4.8035e-20	9.38445e-14		1	-0.421521	1.5046e-15	0.17768
chr9:96068035-96068071	2	AT	19	16	30,29,28,27,26,25,24,23,22,21,20,19,18,17,16,13	13	18	19	22	30	.	LOC158435	LOC158435	0	LOC158435_intron		cg03249723	chr9:96117775	49722	LOC158434	.	LOC158434	.		232	0.04217	0.19031	3.3862e-12	6.61552e-06		1	0.439557	4.25943e-17	0.19321
chr9:95772286-95772335	2	CT/AC	25	20	46,44,43,42,41,40,39,38,37,36,35,34,33,32,30,29,28,27,26,25	25	25	28	39	46	.	.	LINC00476	33753	.		cg12218330	chr9:95771586	-724.5	.	.	LINC00476	.		151	-0.004994	0.3529	8.9784e-16	1.75408e-09		1	-0.519606	8.70794e-18	0.26999
chr9:95772286-95772335	2	CT/AC	25	20	46,44,43,42,41,40,39,38,37,36,35,34,33,32,30,29,28,27,26,25	25	25	28	39	46	.	.	LINC00476	33753	.		cg21198712	chr9:95772045	-265.5	.	.	LINC00476	.		151	-0.01024	0.39323	7.0517e-18	1.37767e-11		1	-0.724845	6.36311e-48	0.5254
chr9:95772286-95772335	2	CT/AC	25	20	46,44,43,42,41,40,39,38,37,36,35,34,33,32,30,29,28,27,26,25	25	25	28	39	46	.	.	LINC00476	33753	.		cg22975387	chr9:95771607	-703.5	.	.	LINC00476	.		151	-0.010328	0.51097	6.5073e-25	1.27131e-18		1	-0.733676	2.31097e-50	0.53828
chr9:95772286-95772335	2	CT/AC	25	20	46,44,43,42,41,40,39,38,37,36,35,34,33,32,30,29,28,27,26,25	25	25	28	39	46	.	.	LINC00476	33753	.		cg24007924	chr9:95771784	-526.5	.	.	LINC00476	.		149	-0.013532	0.62177	7.6598e-33	1.49647e-26		1	-0.787629	3.00509e-64	0.62036
chr9:95760702-95760727	4	AAAT	7	5	12,11,10,8,7	7	7	7	10	12	.	.	LINC00476	45361	.		cg12218330	chr9:95771586	10871.5	.	.	LINC00476	.		245	-0.014995	0.22019	8.0821e-15	1.57898e-08		1	-0.378576	1.76948e-11	0.14332
chr9:95760702-95760727	4	AAAT	7	5	12,11,10,8,7	7	7	7	10	12	.	.	LINC00476	45361	.		cg21198712	chr9:95772045	11330.5	.	.	LINC00476	.		243	-0.03141	0.23948	4.886e-16	9.54563e-10		1	-0.607898	4.88601e-43	0.36954
chr9:95760702-95760727	4	AAAT	7	5	12,11,10,8,7	7	7	7	10	12	.	.	LINC00476	45361	.		cg22975387	chr9:95771607	10892.5	.	.	LINC00476	.		245	-0.032292	0.3199	4.0747e-22	7.96062e-16		1	-0.60464	1.36335e-42	0.36559
chr9:95760702-95760727	4	AAAT	7	5	12,11,10,8,7	7	7	7	10	12	.	.	LINC00476	45361	.		cg24007924	chr9:95771784	11069.5	.	.	LINC00476	.		240	-0.041779	0.36545	2.6454e-25	5.16824e-19		1	-0.668543	6.39736e-57	0.44695
chr9:95544003-95544025	4	AAAC	6	5	9,8,7,6,5	5	6	6	7	9	.	.	PTCH1	26947	.		cg02789967	chr9:95503384	-40630	.	PTCH1	PTCH1	CpG:_236_Shelf_N		242	-0.03297	0.22191	9.0322e-15	1.76459e-08		1	-0.300734	3.71036e-05	0.090441
chr9:95514622-95514660	2	GT/AG	20	12	31,29,27,26,25,24,23,22,21,20,19,18	18	20	20	23	31	.	PTCH1	PTCH1	0	PTCH1_intron		cg02789967	chr9:95503384	-11257	.	PTCH1	PTCH1	CpG:_236_Shelf_N		240	-0.015221	0.1892	1.6909e-12	3.30346e-06		1	-0.369121	1.61044e-10	0.13625
chr9:95514622-95514660	2	GT/AG	20	12	31,29,27,26,25,24,23,22,21,20,19,18	18	20	20	23	31	.	PTCH1	PTCH1	0	PTCH1_intron		cg13456470	chr9:95504484	-10157	.	PTCH1	PTCH1	CpG:_236_Shore_N		243	0.030677	0.18828	1.4108e-12	2.75624e-06		1	0.492179	4.68694e-24	0.24224
chr9:95508365-95508387	3	CCG	8	6	10,9,8,7,6,5	5	8	8	8	10	PTCH1	PTCH1	PTCH1	0	PTCH1_3utr,PTCH1_5utr,PTCH1_intron		cg02789967	chr9:95503384	-4992	.	PTCH1	PTCH1	CpG:_236_Shelf_N		242	-0.04582	0.17803	7.2633e-12	1.41901e-05		1	-0.368904	1.16077e-10	0.13609
chr9:95508033-95508095	2	GT/AG/GT	32	4	32,31,30,28	28	30	32	32	32	PTCH1	PTCH1	PTCH1	0	PTCH1_5utr,PTCH1_intron		cg02789967	chr9:95503384	-4680	.	PTCH1	PTCH1	CpG:_236_Shelf_N		242	0.021732	0.40987	2.6092e-29	5.09752e-23		1	0.500949	2.98962e-25	0.25095
chr9:95507906-95507933	2	AC	15	4	18,17,16,15	15	15	15	17	18	PTCH1	PTCH1	PTCH1	0	PTCH1_intron		cg02789967	chr9:95503384	-4535.5	.	PTCH1	PTCH1	CpG:_236_Shelf_N		242	-0.032658	0.30568	8.9487e-21	1.74828e-14		1	-0.445747	2.52884e-18	0.19869
chr9:95181132-95181190	2	AC/GT	30	10	34,33,32,31,30,29,28,27,26,25	25	25	28	30	34	.	FANCC	FANCC	0	FANCC_intron		cg10732739	chr9:95189383	8222	.	FANCC	FANCC	.		245	-0.018068	0.34032	9.7294e-24	1.9008e-17		1	-0.488518	9.54985e-24	0.23865
chr9:95092057-95092097	2	GT/AC	21	7	23,22,21,20,19,18,17	17	19	19	21	23	.	.	AOPEP	4840	.		cg04228065	chr9:95104469	12392	.	FANCC	FANCC	.		245	0.030175	0.20825	5.2626e-14	1.02814e-07		1	0.567036	2.20038e-35	0.32153
chr9:94847128-94847203	2	AC/CT	38	13	49,48,47,46,45,44,43,42,41,40,39,38,37	37	43	44	46	49	.	AOPEP	AOPEP	0	AOPEP_intron		cg07301298	chr9:94802945	-44220.5	.	C9orf3	C9orf3	.		238	0.015426	0.20007	4.1426e-13	8.09327e-07		1	0.554986	1.25162e-32	0.30801
chr9:94743168-94743273	3	AAG	35	16	41,40,39,38,37,36,35,34,33,32,31,30,28,26,25,24	24	35	35	40	41	.	AOPEP	AOPEP	0	AOPEP_intron		cg18263583	chr9:94783545	40324.5	.	C9orf3	C9orf3	.		245	0.005555	0.18251	2.7367e-12	5.34661e-06		1	0.517378	1.98976e-26	0.26768
chr9:94292608-94292641	2	GT	17	15	27,26,25,24,23,22,21,20,19,18,17,16,15,14,13	13	16	18	23	27	.	ZNF169	ZNF169	0	ZNF169_intron		cg14390143	chr9:94332853	40228.5	LOC100132077	LOC100132077	LOC100132077	CpG:_41_Shore_S		245	-0.019136	0.25401	3.4544e-17	6.74876e-11		1	-0.454687	2.01873e-19	0.20674
chr9:94261015-94261049	4	GTTT	9	3	10,9,8	8	9	9	9	10	LINC02603	ZNF169	ZNF169	0	ZNF169_intron		cg13980266	chr9:94259987	-1045	ZNF169	ZNF169	ZNF169	CpG:_41_Shore_S		245	0.053514	0.33754	1.6289e-23	3.18233e-17		1	0.450111	1.96098e-18	0.2026
chr9:93843643-93843674	2	AG	16	7	18,17,16,15,14,13,12	12	12	13	16	18	.	.	MIR4291	24223	.		cg14396892	chr9:93860750	17091.5	.	.	MIR4291	CpG:_32_Shore_N		244	0.037977	0.30947	3.1711e-21	6.19528e-15		1	0.552232	2.68407e-33	0.30496
chr9:93843643-93843674	2	AG	16	7	18,17,16,15,14,13,12	12	12	13	16	18	.	.	MIR4291	24223	.		cg13679303	chr9:93861392	17733.5	.	.	MIR4291	CpG:_32_Shore_S		243	0.061128	0.44392	1.4925e-32	2.91585e-26		1	0.621587	2.98434e-46	0.38637
chr9:93843643-93843674	2	AG	16	7	18,17,16,15,14,13,12	12	12	13	16	18	.	.	MIR4291	24223	.		cg14598338	chr9:93861198	17539.5	.	.	MIR4291	CpG:_32_Island		241	0.046995	0.46392	3.3079e-34	6.46254e-28		1	0.648305	4.8267e-52	0.4203
chr9:93838251-93838285	2	GT	18	11	27,26,25,24,22,21,20,19,18,17,15	15	18	18	22	27	.	.	MIR4291	18831	.		cg26520847	chr9:93826317	-11951	.	.	MIR4291	CpG:_38_Island		245	-0.010227	0.17749	5.8367e-12	1.1403e-05		1	-0.333632	1.7017e-07	0.11131
chr9:93113512-93113556	2	AC	25	9	25,24,23,22,21,20,19,18,16	16	19	19	20	25	.	.	CARD19	230	.		cg09547190	chr9:93095295	-18239	CARD19	.	CARD19	CpG:_158_Shore_N		186	-0.018019	0.29251	1.6023e-15	3.13037e-09		1	-0.637785	8.66468e-33	0.40677
chr9:93058660-93058680	6	AGGCCC	4	3	5,4,2	2	4	4	4	5	SUSD3	.	SUSD3	8	.		cg17045268	chr9:93053398	-5272	.	.	SUSD3	.		244	0.026197	0.27506	1.2071e-18	2.35828e-12		1	0.463562	1.33732e-20	0.21489
chr9:93058660-93058680	6	AGGCCC	4	3	5,4,2	2	4	4	4	5	SUSD3	.	SUSD3	8	.		cg17919849	chr9:93053099	-5571	.	.	SUSD3	.		245	0.045848	0.46872	3.1488e-35	6.15172e-29		1	0.407443	2.27437e-14	0.16601
chr9:92947033-92947068	2	AC	18	4	19,18,16,13	13	13	18	18	19	FGD3	.	FGD3	455	.		cg12179666	chr9:92943942	-3108.5	.	.	FGD3	.		245	0.011219	0.17278	1.1831e-11	2.31139e-05		0	0	0	0
chr9:92947033-92947068	2	AC	18	4	19,18,16,13	13	13	18	18	19	FGD3	.	FGD3	455	.		cg10055252	chr9:92917669	-29381.5	.	.	LOC642943	.		245	-0.018162	0.2003	1.8056e-13	3.52755e-07		1	-0.381353	1.23919e-11	0.14543
chr9:92764802-92764831	3	CCG	10	5	14,13,12,11,10	10	10	10	10	14	BICD2	BICD2	BICD2	0	BICD2_5utr		cg23021653	chr9:92740116	-24700.5	.	BICD2	BICD2	.		241	-0.038826	0.15995	1.1366e-10	0.000222054		1	-0.446352	1.72378e-18	0.19923
chr9:92764802-92764831	3	CCG	10	5	14,13,12,11,10	10	10	10	10	14	BICD2	BICD2	BICD2	0	BICD2_5utr		cg02683305	chr9:92741152	-23664.5	.	BICD2	BICD2	.		242	-0.028132	0.19229	8.5613e-13	1.6726e-06		1	-0.469915	1.90603e-21	0.22082
chr9:92751135-92751166	3	GTT	12	4	14,13,12,10	10	12	12	13	14	.	BICD2	BICD2	0	BICD2_intron		cg06016945	chr9:92745773	-5377.5	.	BICD2	BICD2	.		219	-0.042333	0.17237	1.5536e-10	0.000303522		1	-0.387814	1.36497e-10	0.1504
chr9:92751135-92751166	3	GTT	12	4	14,13,12,10	10	12	12	13	14	.	BICD2	BICD2	0	BICD2_intron		cg23021653	chr9:92740116	-11034.5	.	BICD2	BICD2	.		242	-0.091211	0.33658	3.6232e-23	7.07854e-17		1	-0.584312	4.40428e-38	0.34142
chr9:92751135-92751166	3	GTT	12	4	14,13,12,10	10	12	12	13	14	.	BICD2	BICD2	0	BICD2_intron		cg02683305	chr9:92741152	-9998.5	.	BICD2	BICD2	.		243	-0.063733	0.37757	1.2799e-26	2.5005e-20		1	-0.634508	2.98767e-48	0.4026
chr9:92567374-92567408	2	AT	20	24	42,41,40,39,38,37,36,34,33,32,31,30,29,28,27,26,25,24,23,22,21,20,19,18	18	21	22	26	42	.	CENPP	CENPP	0	CENPP_intron		cg05863400	chr9:92608026	40635	.	CENPP	CENPP	.		219	0.005471	0.28338	2.0008e-17	3.9089e-11		1	0.405968	9.81939e-11	0.16481
chr9:92374242-92374287	2	GT	23	11	27,26,25,24,23,22,21,20,19,17,16	16	22	24	25	27	.	CENPP	CENPP	0	CENPP_intron		cg14631576	chr9:92378148	3883.5	.	CENPP	CENPP	.		243	0.013834	0.19397	5.9557e-13	1.16355e-06		1	0.460304	2.02773e-19	0.21188
chr9:92352468-92352544	2	GT/AT	41	18	54,53,52,51,50,49,48,46,45,44,43,42,41,40,39,38,37,36	36	41	43	51	54	.	CENPP	CENPP	0	CENPP_intron		cg14631576	chr9:92378148	25642	.	CENPP	CENPP	.		230	-0.005261	0.27342	1.5325e-17	2.994e-11		1	-0.538424	4.14942e-18	0.2899
chr9:91839252-91839295	2	GT	24	22	42,41,40,38,37,36,34,33,31,30,28,27,26,25,24,23,22,21,19,18,17,16	16	19	24	24	42	.	ROR2	ROR2	0	ROR2_intron		cg14376836	chr9:91844356	5082.5	.	ROR2	ROR2	.		200	0.00493	0.28403	4.5273e-16	8.84485e-10		1	0.411084	6.73561e-12	0.16899
chr9:91715503-91715539	5	GTTTT	8	3	9,8,7	7	8	9	9	9	.	.	ROR2	7062	.		cg20351959	chr9:91710296	-5225	.	.	ROR2	.		245	0.064953	0.17544	7.9318e-12	1.54961e-05		1	0.366415	1.9409e-10	0.13426
chr9:91347209-91347243	4	GTTT	9	7	13,12,11,10,9,8,7	7	8	8	9	13	.	AUH	AUH	0	AUH_intron		cg18436808	chr9:91303179	-44047	.	AUH	AUH	.		244	0.042374	0.29709	2.7808e-20	5.43277e-14		1	0.595097	6.25956e-41	0.35414
chr9:91147590-91147639	4	GTTT/CTTG	13	6	18,17,14,13,12,11	11	12	12	12	18	.	LINC00484	LINC00484	0	LINC00484_intron		cg02316326	chr9:91177244	29629.5	.	LINC00484	LINC00484	.		245	-0.0393	0.18828	1.1401e-12	2.22738e-06		1	-0.375633	4.1686e-11	0.1411
chr9:91142885-91142929	4	ATCC	11	7	18,16,15,14,13,12,11	11	13	13	15	18	.	LINC00484	LINC00484	0	LINC00484_intron		cg02316326	chr9:91177244	34337	.	LINC00484	LINC00484	.		245	0.02517	0.25275	4.2478e-17	8.2988e-11		1	0.397731	1.99347e-13	0.15819
chr9:91140570-91140598	2	AC	15	9	23,22,21,20,19,18,17,16,15	15	17	17	18	23	.	LINC00484	LINC00484	0	LINC00484_intron		cg09637050	chr9:91159687	19103	.	LINC00484	LINC00484	CpG:_39_Shore_N		245	0.010247	0.15672	1.2821e-10	0.00025048		1	0.346598	1.12685e-08	0.12013
chr9:90812742-90812803	2	GT/AG	32	14	40,39,38,37,36,35,34,33,32,31,30,29,28,27	27	29	31	34	40	.	SYK	SYK	0	SYK_intron		cg12286006	chr9:90800751	-12021.5	SYK	.	SYK	CpG:_85_Shore_N		244	0.01103	0.15675	1.3912e-10	0.000271795		1	0.486703	2.87335e-23	0.23688
chr9:90782871-90782899	4	GTTT	7	4	8,7,6,5	5	7	7	7	8	.	.	SYK	18701	.		cg12286006	chr9:90800751	17866	SYK	.	SYK	CpG:_85_Shore_N		244	-0.04466	0.174	1.0854e-11	2.12051e-05		1	-0.429977	7.31326e-17	0.18488
chr9:90778496-90778533	4	AAAT	10	6	13,12,11,10,9,7	7	9	9	10	13	.	.	SYK	23067	.		cg12286006	chr9:90800751	22236.5	SYK	.	SYK	CpG:_85_Shore_N		244	-0.043435	0.19121	8.1242e-13	1.5872e-06		1	-0.516914	7.41367e-28	0.2672
chr9:90044126-90044168	2	GT	22	9	24,23,22,21,20,19,18,17,15	15	19	21	21	24	.	.	MIR4290HG	2628	.		cg04299914	chr9:90020373	-23774	.	.	MIR4290HG	.		244	-0.039521	0.29385	4.8766e-20	9.52727e-14		1	-0.513459	4.39978e-27	0.26364
chr9:90008146-90008212	2	AG/GT	35	8	40,39,38,37,36,35,34,33	33	35	35	38	40	.	.	MIR4290HG	12442	.		cg04299914	chr9:90020373	12194	.	.	MIR4290HG	.		244	0.026524	0.1503	3.5705e-10	0.000697558		1	0.596003	4.29407e-39	0.35522
chr9:89984960-89985007	2	GT/AG	24	10	32,30,29,28,27,26,25,24,23,22	22	24	25	27	32	.	LOC101927847	LOC101927847	0	LOC101927847_intron		cg04299914	chr9:90020373	35389.5	.	.	MIR4290HG	.		244	0.024133	0.16933	2.1763e-11	4.25177e-05		1	0.587963	7.68909e-39	0.3457
chr9:89533004-89533035	2	CT	17	3	19,18,17	17	17	17	18	19	.	.	SEMA4D	35032	.		cg05769499	chr9:89564712	31692.5	.	.	GADD45G	.		244	-0.100685	0.21303	2.8193e-14	5.50798e-08		1	-0.5497	6.1611e-32	0.30217
chr9:88948518-88948552	2	GT	18	3	31,21,18	18	18	21	21	31	.	.	C9orf47	42311	.		cg07217750	chr9:88923765	-24770	.	.	C9orf47	.		240	0.015915	0.25022	1.3355e-16	2.60913e-10		1	0.7499	3.51442e-79	0.56235
chr9:88441399-88441428	2	GT/CG	21	19	43,42,41,40,39,38,37,36,35,34,33,32,31,25,24,23,22,21,20	20	21	21	21	43	.	SPIN1	SPIN1	0	SPIN1_intron		cg08925180	chr9:88433921	-7492.5	.	SPIN1	SPIN1	.		240	0.002107	0.22442	7.893e-15	1.54203e-08		1	0.364472	7.38451e-10	0.13284
chr9:88408966-88409010	2	GT	25	14	35,33,32,31,30,29,28,27,26,25,24,23,22,20	20	25	25	26	35	.	SPIN1	SPIN1	0	SPIN1_intron		cg08925180	chr9:88433921	24933	.	SPIN1	SPIN1	.		240	0.007375	0.16595	5.2022e-11	0.000101634		1	0.378523	2.45152e-11	0.14328
chr9:88008294-88008311	2	AG	9	3	10,9,7	7	9	10	10	10	.	.	CDK20	33515	.		cg01400671	chr9:88007185	-1117.5	.	.	CDK20	CpG:_38_Island		245	-0.129083	0.27742	6.8731e-19	1.34278e-12		1	-0.661899	3.76027e-55	0.43811
chr9:88008294-88008311	2	AG	9	3	10,9,7	7	9	10	10	10	.	.	CDK20	33515	.		cg05115664	chr9:88006722	-1580.5	.	.	CDK20	CpG:_38_Island		245	-0.076239	0.32898	7.8523e-23	1.53408e-16		1	-0.507622	2.58463e-26	0.25768
chr9:87982128-87982139	2	AT	6	16	29,28,27,26,25,24,23,22,21,20,19,18,17,16,7,6	6	6	16	21	29	.	.	CDK20	7349	.		cg05115664	chr9:88006722	24588.5	.	.	CDK20	CpG:_38_Island		241	-0.003269	0.16412	6.2003e-11	0.000121133		1	-0.336719	2.73887e-05	0.11338
chr9:87547567-87547614	2	AG/GT	24	5	24,23,22,20,19	19	19	23	23	24	.	DAPK1	DAPK1	0	DAPK1_intron		cg02143465	chr9:87550144	2553.5	.	DAPK1	DAPK1	.		245	-0.021775	0.21962	8.852e-15	1.72939e-08		1	-0.496095	1.38388e-24	0.24611
chr9:85870324-85870355	2	GT	16	12	22,21,20,19,18,17,16,15,14,12,11,6	6	14	16	16	22	.	.	LOC389765	27446	.		cg10024486	chr9:85834697	-35642.5	.	LOC389765	LOC389765	.		245	-0.015099	0.21041	3.7591e-14	7.34404e-08		0	0	0	0
chr9:85807530-85807552	2	GT	15	7	21,20,18,17,16,15,10	10	15	15	15	21	.	LOC389765	LOC389765	0	LOC389765_intron		cg10024486	chr9:85834697	27156	.	LOC389765	LOC389765	.		245	-0.025687	0.33863	1.3324e-23	2.60307e-17		0	0	0	0
chr9:84469290-84469353	2	AT	33	6	37,36,35,34,33,32	32	33	33	33	37	.	.	SLC28A3	100564	.		cg00018674	chr9:84476435	7113.5	.	.	SLC28A3	.		244	0.019431	0.21389	2.464e-14	4.81384e-08		1	0.434304	5.01285e-17	0.18862
chr9:84453884-84453952	4	CTTT	17	3	20,17,14	14	17	17	17	20	.	.	SLC28A3	85158	.		cg00018674	chr9:84476435	22517	.	.	SLC28A3	.		245	0.016277	0.23769	4.9474e-16	9.66559e-10		1	0.437459	4.23574e-17	0.19137
chr9:84405687-84405728	5	AAAAC	8	3	9,8,7	7	8	8	8	9	.	.	SLC28A3	36961	.		cg13148021	chr9:84357267	-48440.5	.	SLC28A3	SLC28A3	.		245	-0.061336	0.15021	3.3287e-10	0.000650318		1	-0.512621	3.66632e-26	0.26278
chr9:84111459-84111523	4	AACC	18	6	23,22,21,19,18,16	16	18	18	18	23	.	.	LOC101927575	16881	.		cg13390867	chr9:84102523	-8968	.	.	LOC101927575	.		244	0.014178	0.18788	1.3475e-12	2.63257e-06		1	0.31686	2.57092e-06	0.1004
chr9:83246643-83246705	2	CT/AC	32	8	37,36,35,34,33,32,31,30	30	33	34	35	37	.	FRMD3	FRMD3	0	FRMD3_3utr,FRMD3_intron		cg19591724	chr9:83199416	-47258	.	.	FRMD3	.		241	-0.037033	0.165	5.4505e-11	0.000106485		1	-0.340514	5.17141e-08	0.11595
chr9:83222906-83222944	4	ATTT	11	6	12,11,10,9,8,7	7	8	9	10	12	.	.	FRMD3	20046	.		cg19591724	chr9:83199416	-23509	.	.	FRMD3	.		239	0.049566	0.41793	1.1231e-29	2.19417e-23		1	0.566842	4.26217e-35	0.32131
chr9:82449163-82449204	2	GT	21	14	24,23,22,21,20,19,18,17,16,15,14,13,10,9	9	16	20	21	24	.	.	SPATA31D1	453911	.		cg05405040	chr9:82404273	-44910.5	.	.	SPATA31D1	.		235	0.014851	0.36347	1.2007e-24	2.34577e-18		1	0.609377	4.07954e-42	0.37134
chr9:82420275-82420339	5	ATTTT	13	4	16,15,14,13	13	13	13	15	16	.	.	SPATA31D1	425023	.		cg05405040	chr9:82404273	-16034	.	.	SPATA31D1	.		240	-0.039086	0.36467	3.0626e-25	5.98331e-19		1	-0.585047	3.19829e-39	0.34228
chr9:82405734-82405793	2	CT/GT	30	4	31,30,29,28	28	28	30	30	31	.	.	SPATA31D1	410482	.		cg05405040	chr9:82404273	-1490.5	.	.	SPATA31D1	.		240	0.049132	0.41199	2.8842e-29	5.63478e-23		1	0.692134	2.12325e-63	0.47905
chr9:81546969-81547000	2	AC	17	10	23,21,18,17,16,15,14,13,12,11	11	11	17	17	23	.	.	TLE1	36683	.		cg08314123	chr9:81539384	-7600.5	.	.	TLE1	.		242	0.017837	0.17219	1.724e-11	3.36813e-05		1	0.707814	8.10544e-67	0.501
chr9:81546969-81547000	2	AC	17	10	23,21,18,17,16,15,14,13,12,11	11	11	17	17	23	.	.	TLE1	36683	.		cg09721385	chr9:81523151	-23833.5	.	.	TLE1	.		241	-0.01576	0.23924	6.7072e-16	1.31037e-09		1	-0.726409	1.90343e-72	0.52767
chr9:81544736-81544761	4	ATTT	7	5	11,10,9,8,7	7	7	7	9	11	.	.	TLE1	38922	.		cg08314123	chr9:81539384	-5364.5	.	.	TLE1	.		245	-0.04081	0.21145	3.1942e-14	6.24041e-08		1	-0.673921	1.11871e-58	0.45417
chr9:81512890-81512918	2	AC	16	4	17,16,15,14	14	14	14	16	17	.	.	TLE1	70765	.		cg09721385	chr9:81523151	10247	.	.	TLE1	.		244	-0.034847	0.15658	1.427e-10	0.000278789		1	-0.497071	4.97703e-25	0.24708
chr9:80644145-80644178	2	AG	21	8	23,22,21,20,19,18,17,16	16	17	20	20	23	.	.	LINC01507	609591	.		cg10841563	chr9:80665103	20941.5	.	.	LINC01507	.		240	-0.113895	0.58502	2.3634e-47	4.6173e-41		1	-0.81656	8.76256e-106	0.66677
chr9:80643306-80643320	2	AT	8	6	12,11,10,9,8,7	7	8	8	10	12	.	.	LINC01507	608752	.		cg15364956	chr9:80649143	5830	.	.	LINC01507	.		244	-0.040609	0.25664	2.5988e-17	5.0772e-11		1	-0.579802	2.95928e-38	0.33617
chr9:80643306-80643320	2	AT	8	6	12,11,10,9,8,7	7	8	8	10	12	.	.	LINC01507	608752	.		cg10841563	chr9:80665103	21790	.	.	LINC01507	.		240	0.173976	0.5825	4.8696e-47	9.51359e-41		1	0.813622	1.5543e-105	0.66198
chr9:78921683-78921750	2	CT/AT	35	15	49,48,47,46,44,43,42,40,39,38,37,36,35,33,30	30	35	35	46	49	.	.	LOC101927450	213672	.		cg14169945	chr9:78961369	39652.5	.	.	LOC101927450	.		242	0.012993	0.27185	2.8582e-18	5.58398e-12		1	0.561079	6.96737e-33	0.31481
chr9:76736129-76736161	2	GT	18	5	20,19,18,17,16	16	17	18	18	20	.	PRUNE2	PRUNE2	0	PRUNE2_intron		cg17673914	chr9:76718193	-17952	.	PRUNE2	PRUNE2	.		245	-0.023833	0.15633	1.3566e-10	0.000265035		0	0	0	0
chr9:76736129-76736161	2	GT	18	5	20,19,18,17,16	16	17	18	18	20	.	PRUNE2	PRUNE2	0	PRUNE2_intron		cg07972220	chr9:76717602	-18543	.	PRUNE2	PRUNE2	.		235	-0.088513	0.24094	1.1831e-15	2.31139e-09		1	-0.424064	1.62248e-15	0.17983
chr9:76702610-76702630	4	AATG	5	6	11,10,9,8,7,5	5	8	9	10	11	.	PRUNE2	PRUNE2	0	PRUNE2_intron		cg06733638	chr9:76705335	2715	.	PRUNE2	PRUNE2	.		245	-0.011856	0.17377	1.0189e-11	1.99059e-05		1	-0.280826	0.000992255	0.078863
chr9:76702610-76702630	4	AATG	5	6	11,10,9,8,7,5	5	8	9	10	11	.	PRUNE2	PRUNE2	0	PRUNE2_intron		cg14228460	chr9:76688885	-13735	.	PRUNE2	PRUNE2	.		244	0.006851	0.1915	7.7724e-13	1.51847e-06		1	0.306738	1.80055e-05	0.094088
chr9:76702610-76702630	4	AATG	5	6	11,10,9,8,7,5	5	8	9	10	11	.	PRUNE2	PRUNE2	0	PRUNE2_intron		cg03904174	chr9:76667860	-34760	.	PRUNE2	PRUNE2	.		233	0.023682	0.2315	6.6617e-15	1.30148e-08		1	0.593591	9.35704e-37	0.35235
chr9:76405289-76405317	2	AC	15	10	21,20,19,18,17,16,15,13,12,11	11	12	16	16	21	.	.	RPSAP9	5252	.		cg16060552	chr9:76402032	-3271	.	.	RPSAP9	.		245	0.019798	0.52371	5.1195e-41	1.00018e-34		1	0.710626	1.21687e-67	0.50499
chr9:74951275-74951308	5	CTTTT	7	3	7,6,5	5	6	7	7	7	C9orf40,CARNMT1-AS1	C9orf40	C9orf40	0	C9orf40_intron		cg02555883	chr9:74940739	-10552.5	.	.	C9orf40	.		245	-0.045519	0.15069	3.1046e-10	0.000606536		1	-0.382714	1.17765e-11	0.14647
chr9:74585785-74585812	4	ATTT	7	8	14,13,12,11,10,9,8,7	7	10	11	12	14	.	RORB	RORB	0	RORB_intron		cg05206385	chr9:74578301	-7497.5	.	MIR6130,RORB	MIR6130	.		241	0.020286	0.20919	7.3252e-14	1.4311e-07		1	0.333092	3.85228e-07	0.11095
chr9:74311029-74311084	2	AC/AG	29	6	33,32,31,30,29,25	25	29	32	32	33	.	.	LOC101927358	60447	.		cg14282114	chr9:74277629	-33427.5	.	MIR6130	MIR6130	.		244	-0.064101	0.35887	3.7126e-25	7.2532e-19		1	-0.702794	1.14012e-65	0.49392
chr9:74295222-74295260	3	AAT	14	10	20,19,18,17,16,15,14,13,12,10	10	15	16	17	20	.	.	LOC101927358	76271	.		cg14282114	chr9:74277629	-17612	.	MIR6130	MIR6130	.		244	-0.053377	0.26349	8.3693e-18	1.63509e-11		1	-0.639805	1.57977e-49	0.40935
chr9:74290784-74290823	2	AC	20	21	38,36,35,34,33,32,31,30,29,28,27,26,25,24,22,21,20,19,18,15,8	8	21	27	30	38	.	.	LOC101927358	80708	.		cg14282114	chr9:74277629	-13174.5	.	MIR6130	MIR6130	.		244	-0.018241	0.28991	9.6197e-20	1.87937e-13		1	-0.625756	4.72471e-46	0.39157
chr9:74267813-74267858	2	GT	23	10	26,25,24,23,22,21,20,19,18,16	16	21	21	23	26	.	.	LOC101927358	103673	.		cg14282114	chr9:74277629	9793.5	.	MIR6130	MIR6130	.		238	0.046337	0.19893	4.9185e-13	9.60913e-07		1	0.577598	3.79688e-37	0.33362
chr9:74260914-74260934	2	AC	11	5	14,13,12,11,9	9	9	9	11	14	.	.	LOC101927358	110597	.		cg14282114	chr9:74277629	16705	.	MIR6130	MIR6130	.		243	0.063512	0.32127	4.7084e-22	9.19866e-16		1	0.646784	1.8737e-51	0.41833
chr9:73545727-73545779	2	AC	27	10	29,28,27,26,25,24,23,22,21,20	20	20	20	20	29	.	.	ANXA1	375335	.		cg06309058	chr9:73573432	27679	.	.	MIR6130	.		244	0.028964	0.20176	1.6159e-13	3.15694e-07		1	0.60569	5.3511e-43	0.36686
chr9:72617903-72617957	2	GT	28	13	31,30,29,28,27,26,25,24,23,22,21,20,14	14	25	26	28	31	.	TMC1	TMC1	0	TMC1_intron		cg22154765	chr9:72585765	-32165	.	TMC1	TMC1	.		245	-0.022255	0.17377	1.0197e-11	1.99216e-05		1	-0.534855	1.50382e-29	0.28607
chr9:72603550-72603580	3	GTT	10	3	11,10,7	7	10	10	11	11	.	TMC1	TMC1	0	TMC1_intron		cg22154765	chr9:72585765	-17800	.	TMC1	TMC1	.		245	0.152814	0.24746	1.0112e-16	1.97555e-10		1	0.424865	8.07627e-16	0.18051
chr9:72580558-72580582	2	GT	13	4	15,14,13,12	12	13	13	14	15	.	TMC1	TMC1	0	TMC1_intron		cg22154765	chr9:72585765	5195	.	TMC1	TMC1	.		245	0.132164	0.44419	7.7896e-33	1.52183e-26		1	0.589686	6.64811e-40	0.34773
chr9:72578266-72578305	2	GT	23	9	25,24,23,22,21,20,19,18,17	17	22	22	23	25	.	TMC1	TMC1	0	TMC1_intron		cg22154765	chr9:72585765	7479.5	.	TMC1	TMC1	.		194	0.057255	0.18367	4.5454e-10	0.000888021		1	0.454555	1.23545e-14	0.20662
chr9:72575908-72575927	2	AC	10	3	11,10,9	9	9	9	10	11	.	TMC1	TMC1	0	TMC1_intron		cg22154765	chr9:72585765	9847.5	.	TMC1	TMC1	.		245	-0.205874	0.71595	2.3295e-68	4.55107e-62		1	-0.852637	7.73235e-131	0.72699
chr9:72543929-72543967	6	CTTTTT	7	3	9,8,7	7	7	8	9	9	.	TMC1	TMC1	0	TMC1_intron		cg22154765	chr9:72585765	41817	.	TMC1	TMC1	.		243	0.134329	0.5952	3.1204e-49	6.09623e-43		1	0.707912	5.01403e-50	0.50114
chr9:72319930-72320026	2	AT/AC/AT	49	9	59,58,57,56,55,51,50,49,48	48	49	49	56	59	.	LINC01504	LINC01504	0	LINC01504_intron		cg05199819	chr9:72315940	-4038	.	LINC01504	LINC01504	.		243	0.003372	0.14894	4.7251e-10	0.000923129		1	0.408228	6.25779e-14	0.16665
chr9:72315459-72315490	2	GT	16	6	19,18,17,16,15,14	14	15	16	16	19	.	LINC01504	LINC01504	0	LINC01504_5utr,LINC01504_intron		cg09464775	chr9:72304060	-11414.5	LINC01504	.	LINC01504	.		239	0.020089	0.15885	1.5924e-10	0.000311102		1	0.337076	6.71466e-08	0.11362
chr9:72158873-72158906	3	ATC	11	5	13,12,11,10,9	9	11	11	11	13	.	GDA	GDA	0	GDA_intron		cg05729185	chr9:72147962	-10927.5	GDA	GDA	GDA	CpG:_71_Shore_N		243	0.04603	0.31206	2.4237e-21	4.73511e-15		1	0.526669	1.85316e-29	0.27738
chr9:72150319-72150358	2	AC	20	4	21,20,19,17	17	20	20	20	21	.	GDA	GDA	0	GDA_intron		cg05729185	chr9:72147962	-2376.5	GDA	GDA	GDA	CpG:_71_Shore_N		243	0.03275	0.30755	5.3591e-21	1.04699e-14		1	0.549099	2.59559e-32	0.30151
chr9:697077-697113	2	GT	19	5	20,19,18,17,13	13	13	13	17	20	.	KANK1	KANK1	0	KANK1_intron		cg20353750	chr9:695218	-1877	.	KANK1	KANK1	.		244	-0.00842	0.25792	2.1044e-17	4.1113e-11		1	-0.53834	1.11577e-30	0.28981
chr9:69430540-69430572	2	GT/AG	19	5	20,19,18,17,14	14	17	19	19	20	.	APBA1	APBA1	0	APBA1_3utr		cg11032145	chr9:69429336	-1220	.	APBA1	APBA1	.		243	-0.04741	0.34314	8.8155e-24	1.72226e-17		1	-0.555239	5.86474e-34	0.30829
chr9:69401008-69401033	2	AG	13	3	16,15,13	13	15	15	15	16	.	.	FAM189A2	8535	.		cg12219752	chr9:69385361	-15659.5	.	FAM189A2	FAM189A2	.		245	0.084595	0.35081	1.3689e-24	2.67438e-18		1	0.677178	8.65098e-60	0.45857
chr9:69134923-69134996	2	AG	37	4	40,39,37,36	36	37	37	37	40	.	TJP2	TJP2	0	TJP2_intron		cg14326805	chr9:69122840	-12119.5	TJP2	TJP2	TJP2	CpG:_99_Shore_S		243	0.025449	0.15298	2.6301e-10	0.000513835		1	0.305629	1.5185e-05	0.093409
chr9:6738136-6738183	5	AAACT	10	9	14,13,12,11,10,9,8,7,5	5	8	10	11	14	.	KDM4C	KDM4C	0	KDM4C_intron		cg14508358	chr9:6716417	-21742.5	.	.	KDM4C	CpG:_49_Island		244	0.045203	0.19947	2.3004e-13	4.49422e-07		1	0.466348	9.88809e-21	0.21748
chr9:6725324-6725339	2	GT	11	5	15,14,13,12,11	11	11	11	13	15	.	KDM4C	KDM4C	0	KDM4C_intron		cg19602930	chr9:6715738	-9593.5	.	.	KDM4C	CpG:_49_Shore_N		245	-0.013864	0.17583	7.4846e-12	1.46224e-05		0	0	0	0
chr9:6725324-6725339	2	GT	11	5	15,14,13,12,11	11	11	11	13	15	.	KDM4C	KDM4C	0	KDM4C_intron		cg14508358	chr9:6716417	-8914.5	.	.	KDM4C	CpG:_49_Island		244	0.067706	0.18224	3.1576e-12	6.16891e-06		1	0.540611	2.05983e-31	0.29226
chr9:6725324-6725339	2	GT	11	5	15,14,13,12,11	11	11	11	13	15	.	KDM4C	KDM4C	0	KDM4C_intron		cg07830218	chr9:6714365	-10966.5	.	.	KDM4C	CpG:_49_Shore_N		245	-0.070321	0.26382	6.7872e-18	1.32599e-11		1	-0.620048	6.27052e-46	0.38446
chr9:61680061-61680116	2	AC	31	4	33,32,31,30	30	31	31	32	33	.	.	FAM27C	102282	.		cg04783151	chr9:61658944	-21144.5	.	.	FAM27C	CpG:_19_Island		239	-0.081285	0.16762	4.4792e-11	8.75088e-05		1	-0.310921	6.99928e-06	0.096672
chr9:61663980-61664006	2	GT	15	5	18,17,16,15,14	14	14	14	14	18	.	.	FAM27C	118392	.		cg09448605	chr9:61640916	-23077	.	.	FAM27C	.		219	0.041321	0.21927	2.4691e-13	4.82381e-07		0	0	0	0
chr9:61592524-61592557	5	CTTTT	7	6	12,9,8,7,6,5	5	5	6	7	12	.	.	FAM27C	189841	.		cg24574495	chr9:61634560	42019.5	.	.	FAM27C	CpG:_38_Island		189	0.045321	0.23645	1.3092e-12	2.55774e-06		0	0	0	0
chr9:61592524-61592557	5	CTTTT	7	6	12,9,8,7,6,5	5	5	6	7	12	.	.	FAM27C	189841	.		cg26741255	chr9:61615218	22677.5	.	.	FAM27C	.		189	0.052412	0.24484	4.5781e-13	8.9441e-07		0	0	0	0
chr9:61592524-61592557	5	CTTTT	7	6	12,9,8,7,6,5	5	5	6	7	12	.	.	FAM27C	189841	.		cg03695756	chr9:61641312	48771.5	.	.	FAM27C	.		189	0.098434	0.46917	1.624e-27	3.17276e-21		0	0	0	0
chr9:6129886-6129918	4	AAAC	8	5	10,9,8,7,6	6	6	6	8	10	.	.	IL33	85231	.		cg04574909	chr9:6121878	-8024	.	.	IL33	.		245	-0.017753	0.18724	1.3359e-12	2.60991e-06		1	-0.497464	3.81802e-25	0.24747
chr9:6116275-6116320	3	AAT	15	10	18,17,16,15,14,13,12,11,10,9	9	14	14	15	18	.	.	IL33	98829	.		cg04574909	chr9:6121878	5580.5	.	.	IL33	.		245	0.012799	0.24811	9.104e-17	1.77862e-10		1	0.489816	1.68422e-23	0.23992
chr9:5015519-5015552	6	CTTTTT	6	3	6,5,4	4	5	6	6	6	.	JAK2	JAK2	0	JAK2_intron		cg03390472	chr9:5043263	27727.5	.	JAK2	JAK2	CpG:_36_Island		240	0.064667	0.15398	2.9395e-10	0.000574281		1	0.463033	2.57523e-18	0.2144
chr9:468171-468210	4	AAAT	11	7	16,15,14,13,12,11,9	9	12	12	12	16	.	.	KANK1	2081	.		cg03474430	chr9:469325	1134.5	KANK1	.	KANK1	CpG:_22_Shore_N		245	-0.133222	0.163	5.0714e-11	9.90784e-05		1	-0.475752	3.44258e-22	0.22634
chr9:4650825-4650875	2	GT	26	13	28,27,26,25,24,23,22,21,20,18,17,16,15	15	15	16	25	28	.	SPATA6L	SPATA6L	0	SPATA6L_intron		cg13763482	chr9:4663107	12257	PLPP6	PLPP6,SPATA6L	SPATA6L	CpG:_67_Shore_S		245	0.012118	0.16233	5.5954e-11	0.000109316		1	0.492879	7.58749e-24	0.24293
chr9:4650825-4650875	2	GT	26	13	28,27,26,25,24,23,22,21,20,18,17,16,15	15	15	16	25	28	.	SPATA6L	SPATA6L	0	SPATA6L_intron		cg07557063	chr9:4666891	16041	SPATA6L	.	SPATA6L	CpG:_67_Shelf_S		243	0.008511	0.17444	1.1207e-11	2.18948e-05		0	0	0	0
chr9:4650825-4650875	2	GT	26	13	28,27,26,25,24,23,22,21,20,18,17,16,15	15	15	16	25	28	.	SPATA6L	SPATA6L	0	SPATA6L_intron		cg13696752	chr9:4662858	12008	PLPP6	PLPP6,SPATA6L	SPATA6L	CpG:_67_Island		245	0.006867	0.22223	5.8606e-15	1.14497e-08		1	0.479875	3.76145e-22	0.23028
chr9:4650825-4650875	2	GT	26	13	28,27,26,25,24,23,22,21,20,18,17,16,15	15	15	16	25	28	.	SPATA6L	SPATA6L	0	SPATA6L_intron		cg27204993	chr9:4662937	12087	PLPP6	PLPP6,SPATA6L	SPATA6L	CpG:_67_Island		244	0.00983	0.25345	4.3909e-17	8.57837e-11		1	0.503061	1.02831e-24	0.25307
chr9:4646124-4646145	2	AC	11	5	16,15,14,12,11	11	11	11	14	16	.	SPATA6L	SPATA6L	0	SPATA6L_intron		cg13763482	chr9:4663107	16972.5	PLPP6	PLPP6,SPATA6L	SPATA6L	CpG:_67_Shore_S		245	-0.041129	0.18367	2.296e-12	4.48563e-06		1	-0.4998	2.40924e-25	0.2498
chr9:4646124-4646145	2	AC	11	5	16,15,14,12,11	11	11	11	14	16	.	SPATA6L	SPATA6L	0	SPATA6L_intron		cg13696752	chr9:4662858	16723.5	PLPP6	PLPP6,SPATA6L	SPATA6L	CpG:_67_Island		245	-0.022352	0.23126	1.3905e-15	2.71658e-09		1	-0.456213	1.04957e-19	0.20813
chr9:4646124-4646145	2	AC	11	5	16,15,14,12,11	11	11	11	14	16	.	SPATA6L	SPATA6L	0	SPATA6L_intron		cg07557063	chr9:4666891	20756.5	SPATA6L	.	SPATA6L	CpG:_67_Shelf_S		243	-0.031358	0.23373	1.2261e-15	2.39539e-09		1	-0.291657	0.000148485	0.085064
chr9:4646124-4646145	2	AC	11	5	16,15,14,12,11	11	11	11	14	16	.	SPATA6L	SPATA6L	0	SPATA6L_intron		cg27204993	chr9:4662937	16802.5	PLPP6	PLPP6,SPATA6L	SPATA6L	CpG:_67_Island		244	-0.031257	0.25116	6.392e-17	1.24879e-10		1	-0.492544	7.30954e-24	0.2426
chr9:4583854-4583912	2	CT/AC	30	13	40,38,37,36,35,34,33,32,31,30,29,28,27	27	29	30	35	40	.	SLC1A1	SLC1A1	0	SLC1A1_intron		cg26805839	chr9:4575020	-8863	.	SLC1A1	SLC1A1	.		241	0.041815	0.22202	1.0091e-14	1.97145e-08		1	0.461097	1.00928e-19	0.21261
chr9:4580231-4580281	4	AAAG	14	3	15,14,13	13	14	14	15	15	.	SLC1A1	SLC1A1	0	SLC1A1_intron		cg26805839	chr9:4575020	-5236	.	SLC1A1	SLC1A1	.		241	0.394516	0.47905	1.065e-35	2.08066e-29		1	0.638584	1.73456e-49	0.40779
chr9:4571682-4571707	4	AAAT	7	3	9,8,7	7	7	8	8	9	.	SLC1A1	SLC1A1	0	SLC1A1_intron		cg26805839	chr9:4575020	3325.5	.	SLC1A1	SLC1A1	.		241	0.347172	0.37007	8.7285e-26	1.70526e-19		1	0.528819	2.75062e-29	0.27965
chr9:4488108-4488126	4	GGTT	6	3	8,7,6	6	7	7	7	8	.	.	SLC1A1	2342	.		cg22336184	chr9:4489680	1563	SLC1A1	.	SLC1A1	CpG:_20_Shore_N,CpG:_74_Shore_N		242	-0.066074	0.17876	6.5092e-12	1.27168e-05		1	-0.280271	0.000738333	0.078552
chr9:4488108-4488126	4	GGTT	6	3	8,7,6	6	7	7	7	8	.	.	SLC1A1	2342	.		cg16604553	chr9:4489544	1427	SLC1A1	.	SLC1A1	CpG:_20_Shore_N,CpG:_74_Shore_N		245	-0.115169	0.25425	3.3219e-17	6.4899e-11		1	-0.327307	3.50952e-07	0.10713
chr9:444336-444365	3	N/A	11	7	17,16,15,14,13,12,11	11	14	15	15	17	.	DOCK8	DOCK8	0	DOCK8_intron		cg03474430	chr9:469325	24974.5	KANK1	.	KANK1	CpG:_22_Shore_N		245	-0.074864	0.37074	3.0123e-26	5.88504e-20		1	-0.695313	2.01912e-63	0.48346
chr9:4133826-4133875	2	AC	25	18	35,32,31,30,29,28,27,26,25,24,23,22,21,20,19,16,15,14	14	14	25	27	35	.	GLIS3	GLIS3	0	GLIS3_intron		cg13243685	chr9:4145286	11435.5	.	GLIS3	GLIS3	.		241	-0.002174	0.17069	2.3691e-11	4.62844e-05		1	-0.371874	1.66897e-10	0.13829
chr9:4133826-4133875	2	AC	25	18	35,32,31,30,29,28,27,26,25,24,23,22,21,20,19,16,15,14	14	14	25	27	35	.	GLIS3	GLIS3	0	GLIS3_intron		cg11935287	chr9:4138322	4471.5	.	GLIS3	GLIS3	.		244	0.013714	0.18033	4.206e-12	8.21714e-06		1	0.443667	6.83818e-18	0.19684
chr9:4133826-4133875	2	AC	25	18	35,32,31,30,29,28,27,26,25,24,23,22,21,20,19,16,15,14	14	14	25	27	35	.	GLIS3	GLIS3	0	GLIS3_intron		cg01748496	chr9:4126656	-7194.5	.	GLIS3	GLIS3	.		243	0.012289	0.48274	2.3396e-36	4.57081e-30		1	0.762398	2.1072e-84	0.58125
chr9:4133826-4133875	2	AC	25	18	35,32,31,30,29,28,27,26,25,24,23,22,21,20,19,16,15,14	14	14	25	27	35	.	GLIS3	GLIS3	0	GLIS3_intron		cg11123501	chr9:4152282	18431.5	GLIS3	GLIS3	GLIS3	.		244	-0.019361	0.50848	3.4005e-39	6.64345e-33		1	-0.648899	1.82382e-51	0.42107
chr9:4133826-4133875	2	AC	25	18	35,32,31,30,29,28,27,26,25,24,23,22,21,20,19,16,15,14	14	14	25	27	35	.	GLIS3	GLIS3	0	GLIS3_intron		cg08551019	chr9:4147699	13848.5	.	GLIS3	GLIS3	.		243	-0.025862	0.58068	2.2066e-47	4.31097e-41		1	-0.696721	1.60284e-63	0.48542
chr9:4125634-4125655	2	GT	13	7	17,16,15,14,13,12,11	11	11	13	15	17	.	GLIS3	GLIS3	0	GLIS3_intron		cg13243685	chr9:4145286	19641.5	.	GLIS3	GLIS3	.		242	-0.007042	0.18263	3.6564e-12	7.1434e-06		1	-0.324546	1.1972e-06	0.10533
chr9:4125634-4125655	2	GT	13	7	17,16,15,14,13,12,11	11	11	13	15	17	.	GLIS3	GLIS3	0	GLIS3_intron		cg11123501	chr9:4152282	26637.5	GLIS3	GLIS3	GLIS3	.		245	-0.050844	0.37978	5.1327e-27	1.00276e-20		1	-0.447862	2.02088e-18	0.20058
chr9:4125634-4125655	2	GT	13	7	17,16,15,14,13,12,11	11	11	13	15	17	.	GLIS3	GLIS3	0	GLIS3_intron		cg01748496	chr9:4126656	1011.5	.	GLIS3	GLIS3	.		244	0.033428	0.38706	1.5498e-27	3.0278e-21		1	0.621225	1.97233e-45	0.38592
chr9:4125634-4125655	2	GT	13	7	17,16,15,14,13,12,11	11	11	13	15	17	.	GLIS3	GLIS3	0	GLIS3_intron		cg11935287	chr9:4138322	12677.5	.	GLIS3	GLIS3	.		245	0.062003	0.40004	8.8525e-29	1.72949e-22		1	0.706477	1.9786e-66	0.49911
chr9:4125634-4125655	2	GT	13	7	17,16,15,14,13,12,11	11	11	13	15	17	.	GLIS3	GLIS3	0	GLIS3_intron		cg08551019	chr9:4147699	22054.5	.	GLIS3	GLIS3	.		244	-0.068779	0.45106	2.3084e-33	4.50985e-27		1	-0.467194	9.98068e-21	0.21827
chr9:39817736-39817764	4	AAAC	8	3	8,7,6	6	7	7	7	8	.	FGF7P3	FGF7P3	0	FGF7P3_intron		cg23565561	chr9:39792078	-25672	.	.	GLIDR	CpG:_56_Island		228	0.089357	0.18166	1.7706e-11	3.45917e-05		0	0	0	0
chr9:38478013-38478050	2	GT	21	14	31,29,28,27,26,25,24,23,22,21,20,19,18,16	16	21	22	23	31	.	.	IGFBPL1	53560	.		cg05196454	chr9:38483512	5480.5	.	.	FAM95C	.		241	-0.028454	0.23951	6.4215e-16	1.25455e-09		1	-0.608892	1.25091e-42	0.37075
chr9:38203802-38203823	4	CCTT	6	4	9,8,7,6	6	7	7	8	9	.	.	SHB	134576	.		cg22560325	chr9:38229078	25265.5	.	.	SHB	.		244	0.045645	0.15635	1.4763e-10	0.00028842		1	0.318857	2.26928e-06	0.10167
chr9:37998206-37998230	4	AGGG	6	3	10,8,6	6	6	6	10	10	.	SHB	SHB	0	SHB_intron		cg03530002	chr9:38026094	27876	.	SHB	SHB	.		245	-0.018043	0.2707	2.1409e-18	4.18261e-12		0	0	0	0
chr9:37998206-37998230	4	AGGG	6	3	10,8,6	6	6	6	10	10	.	SHB	SHB	0	SHB_intron		cg10608169	chr9:37964633	-33585	.	SHB	SHB	.		245	0.055823	0.46803	3.6891e-35	7.20728e-29		1	0.63561	3.88986e-47	0.404
chr9:37992868-37992899	2	AC	16	3	17,16,14	14	14	16	16	17	.	SHB	SHB	0	SHB_intron		cg03530002	chr9:38026094	33210.5	.	SHB	SHB	.		245	0.034313	0.31499	9.843e-22	1.923e-15		1	0.411643	9.17734e-15	0.16945
chr9:37992868-37992899	2	AC	16	3	17,16,14	14	14	16	16	17	.	SHB	SHB	0	SHB_intron		cg10608169	chr9:37964633	-28250.5	.	SHB	SHB	.		245	-0.106551	0.54863	7.3032e-44	1.4268e-37		1	-0.792711	1.16807e-97	0.62839
chr9:37821091-37821125	2	AT/AC	18	7	23,22,21,20,19,18,17	17	17	18	18	23	.	DCAF10	DCAF10	0	DCAF10_intron		cg11536788	chr9:37800141	-20967	DCAF10	.	DCAF10	CpG:_113_Shore_N		239	-0.019607	0.2222	1.2652e-14	2.47178e-08		0	0	0	0
chr9:37821091-37821125	2	AT/AC	18	7	23,22,21,20,19,18,17	17	17	18	18	23	.	DCAF10	DCAF10	0	DCAF10_intron		cg14364844	chr9:37830050	8942	.	DCAF10	DCAF10	.		245	-0.011823	0.24081	2.9873e-16	5.8362e-10		1	-0.670216	9.91569e-58	0.44919
chr9:37816660-37816691	2	GT	16	15	28,27,26,25,24,23,21,20,19,18,17,16,15,14,13	13	16	16	17	28	.	DCAF10	DCAF10	0	DCAF10_intron		cg14364844	chr9:37830050	13374.5	.	DCAF10	DCAF10	.		245	-0.004596	0.25149	5.2307e-17	1.02191e-10		1	-0.699786	1.59789e-64	0.4897
chr9:37816660-37816691	2	GT	16	15	28,27,26,25,24,23,21,20,19,18,17,16,15,14,13	13	16	16	17	28	.	DCAF10	DCAF10	0	DCAF10_intron		cg11536788	chr9:37800141	-16534.5	DCAF10	.	DCAF10	CpG:_113_Shore_N		239	-0.008129	0.25996	3.2254e-17	6.30137e-11		0	0	0	0
chr9:37741451-37741492	2	AC	21	14	25,24,23,22,21,20,19,18,17,16,14,12,10,9	9	21	21	22	25	.	FRMPD1	FRMPD1	0	FRMPD1_intron		cg05497027	chr9:37741848	376.5	.	FRMPD1	FRMPD1	.		234	-0.00702	0.19271	1.9237e-12	3.75827e-06		0	0	0	0
chr9:37348348-37348393	4	CTTT	13	13	21,20,19,18,17,16,15,14,13,12,11,10,9	9	12	15	16	21	.	ZCCHC7	ZCCHC7	0	ZCCHC7_intron		cg12008478	chr9:37343102	-5268.5	.	ZCCHC7	ZCCHC7	.		235	0.030226	0.29285	2.8083e-19	5.48649e-13		1	0.70204	2.02186e-64	0.49286
chr9:37305833-37305851	2	AT	12	4	13,12,11,10	10	10	10	12	13	.	ZCCHC7	ZCCHC7	0	ZCCHC7_intron		cg12008478	chr9:37343102	37260	.	ZCCHC7	ZCCHC7	.		235	-0.095882	0.57	1.3737e-44	2.68376e-38		1	-0.838457	1.06306e-119	0.70301
chr9:37123191-37123242	2	GT	26	9	28,26,25,24,23,22,21,20,11	11	21	24	24	28	.	ZCCHC7	ZCCHC7	0	ZCCHC7_intron		cg14294708	chr9:37120831	-2385.5	ZCCHC7	ZCCHC7	ZCCHC7	CpG:_89_Island		245	-0.010027	0.16358	4.6516e-11	9.08769e-05		1	-0.617163	1.71784e-44	0.38089
chr9:37090531-37090579	4	ATTT	12	9	17,16,15,14,13,12,11,10,8	8	11	12	12	17	.	.	EBLN3P	131	.		cg14294708	chr9:37120831	30276	ZCCHC7	ZCCHC7	ZCCHC7	CpG:_89_Island		245	-0.023829	0.30119	1.1343e-20	2.21605e-14		1	-0.457078	9.2758e-20	0.20892
chr9:37089800-37089835	2	GT	18	13	27,26,25,24,23,22,21,20,19,18,17,16,9	9	18	20	22	27	.	EBLN3P	EBLN3P	0	EBLN3P_5utr		cg14294708	chr9:37120831	31013.5	ZCCHC7	ZCCHC7	ZCCHC7	CpG:_89_Island		244	0.017751	0.15128	3.0938e-10	0.000604426		1	0.526526	8.45661e-29	0.27723
chr9:37089800-37089835	2	GT	18	13	27,26,25,24,23,22,21,20,19,18,17,16,9	9	18	20	22	27	.	EBLN3P	EBLN3P	0	EBLN3P_5utr		cg08167410	chr9:37062053	-27764.5	.	.	EBLN3	.		244	-0.084468	0.39679	2.2091e-28	4.31585e-22		1	-0.81837	4.34458e-109	0.66973
chr9:37057884-37057907	3	ATT	8	4	10,9,8,7	7	7	8	8	10	.	.	EBLN3P	21989	.		cg08167410	chr9:37062053	4157.5	.	.	EBLN3	.		245	0.18022	0.16541	3.5466e-11	6.92889e-05		1	0.372129	6.39775e-11	0.13848
chr9:36563086-36563122	3	ATT	12	8	18,17,16,15,14,13,12,11	11	12	12	12	18	.	.	MELK	9740	.		cg12878155	chr9:36560982	-2122	.	.	MELK	.		237	-0.0251	0.30711	1.7633e-20	3.44491e-14		1	-0.483363	3.00333e-22	0.23364
chr9:36254206-36254232	4	AAAT	7	5	11,10,9,8,7	7	8	8	8	11	.	GNE	GNE	0	GNE_intron		cg12392374	chr9:36277316	23097	GNE	.	GNE	.		244	-0.033761	0.22124	7.7734e-15	1.51867e-08		1	-0.448486	8.68465e-19	0.20114
chr9:36238124-36238146	2	AC	12	6	17,15,14,13,12,11	11	12	13	13	17	.	GNE	GNE	0	GNE_intron		cg25830530	chr9:36276954	38819	GNE	GNE	GNE	.		239	-0.070065	0.16331	8.367e-11	0.000163464		1	-0.404722	9.73424e-14	0.1638
chr9:36238124-36238146	2	AC	12	6	17,15,14,13,12,11	11	12	13	13	17	.	GNE	GNE	0	GNE_intron		cg12392374	chr9:36277316	39181	GNE	.	GNE	.		241	-0.02527	0.25225	8.318e-17	1.62506e-10		1	-0.477378	6.85991e-22	0.22789
chr9:35590550-35590577	2	AT	14	3	15,14,13	13	13	14	14	15	.	.	TESK1	14685	.		cg10068883	chr9:35564041	-26522.5	FAM166B	.	FAM166B	.		243	-0.105397	0.15048	3.7834e-10	0.000739152		1	-0.396548	4.0308e-13	0.15725
chr9:35590550-35590577	2	AT	14	3	15,14,13	13	13	14	14	15	.	.	TESK1	14685	.		cg21212076	chr9:35564055	-26508.5	FAM166B	.	FAM166B	.		242	-0.090862	0.16154	8.2455e-11	0.00016109		1	-0.419535	2.2084e-15	0.17601
chr9:35490117-35490139	3	CCG	8	4	10,8,7,5	5	8	8	8	10	.	RUSC2	RUSC2	0	RUSC2_5utr		cg15271616	chr9:35490518	390	RUSC2	RUSC2	RUSC2	CpG:_83_Island		245	-0.044266	0.43092	1.3889e-31	2.71345e-25		1	-0.706265	1.61365e-66	0.49881
chr9:35084129-35084176	4	AAAT	12	7	13,12,11,10,9,8,5	5	8	8	11	13	.	.	FANCG	4114	.		cg04961911	chr9:35079144	-5008.5	FANCG	FANCG	FANCG	CpG:_57_Shore_N		245	-0.016862	0.18362	2.3108e-12	4.51454e-06		1	-0.395361	3.74031e-13	0.15631
chr9:35084129-35084176	4	AAAT	12	7	13,12,11,10,9,8,5	5	8	8	11	13	.	.	FANCG	4114	.		cg05293216	chr9:35080815	-3337.5	FANCG	.	FANCG	CpG:_57_Shore_S		245	0.024279	0.18896	1.0281e-12	2.00857e-06		1	0.377054	2.26223e-11	0.14217
chr9:35084129-35084176	4	AAAT	12	7	13,12,11,10,9,8,5	5	8	8	11	13	.	.	FANCG	4114	.		cg22070613	chr9:35080827	-3325.5	FANCG	.	FANCG	CpG:_57_Shore_S		245	0.015959	0.24211	2.4194e-16	4.72671e-10		1	0.444083	2.5259e-18	0.19721
chr9:35084129-35084176	4	AAAT	12	7	13,12,11,10,9,8,5	5	8	8	11	13	.	.	FANCG	4114	.		cg08291335	chr9:35080811	-3341.5	FANCG	.	FANCG	CpG:_57_Shore_S		244	0.048138	0.2715	2.1984e-18	4.29495e-12		1	0.478414	1.5614e-22	0.22888
chr9:35084129-35084176	4	AAAT	12	7	13,12,11,10,9,8,5	5	8	8	11	13	.	.	FANCG	4114	.		cg05381508	chr9:35080818	-3334.5	FANCG	.	FANCG	CpG:_57_Shore_S		245	0.051219	0.29489	3.414e-20	6.66983e-14		1	0.491752	2.65666e-24	0.24182
chr9:34645492-34645511	4	AAAC	5	3	5,4,3	3	4	5	5	5	GALT	.	GALT	1078	.		cg03052183	chr9:34664765	19263.5	LOC730098	LOC730098	LOC730098	CpG:_64_Shore_N		245	-0.092748	0.19011	8.6292e-13	1.68586e-06		1	-0.595449	2.21545e-41	0.35456
chr9:34299805-34299847	2	GT	22	6	23,22,21,20,19,18	18	20	20.5	21	23	.	KIF24	KIF24	0	KIF24_intron		cg04057106	chr9:34263429	-36397	.	KIF24	KIF24	.		242	-0.031154	0.37948	1.1219e-26	2.19182e-20		1	-0.594887	2.56094e-40	0.35389
chr9:33747655-33747687	2	AC	18	12	25,24,23,22,21,20,19,18,17,14,13,8	8	17	20	21	25	.	.	PRSS3	2779	.		cg00384816	chr9:33750543	2872	PRSS3	PRSS3	PRSS3	CpG:_51_Island		244	0.011788	0.18962	1.0345e-12	2.02107e-06		1	0.420345	2.00013e-15	0.17669
chr9:33747655-33747687	2	AC	18	12	25,24,23,22,21,20,19,18,17,14,13,8	8	17	20	21	25	.	.	PRSS3	2779	.		cg14133635	chr9:33749418	1747	PRSS3	.	PRSS3	CpG:_51_Shore_N		145	-0.017764	0.34079	1.2939e-14	2.52785e-08		1	-0.564012	1.53735e-18	0.31811
chr9:33724403-33724427	2	AT	13	10	26,19,18,17,16,15,14,13,12,11	11	12	13	15	26	.	.	LINC01251	8548	.		cg01911394	chr9:33751155	26740	PRSS3	PRSS3	PRSS3	CpG:_51_Island		217	0.019736	0.21575	5.1927e-13	1.01448e-06		1	0.327246	5.99354e-06	0.10709
chr9:33724403-33724427	2	AT	13	10	26,19,18,17,16,15,14,13,12,11	11	12	13	15	26	.	.	LINC01251	8548	.		cg14120636	chr9:33751251	26836	PRSS3	PRSS3	PRSS3	CpG:_51_Shore_S		218	0.015308	0.21601	4.4198e-13	8.63483e-07		1	0.33453	1.83122e-06	0.11191
chr9:33724403-33724427	2	AT	13	10	26,19,18,17,16,15,14,13,12,11	11	12	13	15	26	.	.	LINC01251	8548	.		cg00384816	chr9:33750543	26128	PRSS3	PRSS3	PRSS3	CpG:_51_Island		218	-0.01991	0.21867	3.0436e-13	5.94619e-07		1	-0.353214	7.56185e-08	0.12476
chr9:33485924-33485941	2	AT	11	22	32,31,30,29,28,27,26,25,24,23,21,20,19,18,17,16,15,14,12,11,10,9	9	11	11	27	32	.	.	NOL6	11982	.		cg05397870	chr9:33523366	37433.5	ANKRD18B	.	ANKRD18B	CpG:_114_Shore_N		229	0.007918	0.21658	1.0415e-13	2.03475e-07		1	0.449811	1.48512e-10	0.20233
chr9:33485924-33485941	2	AT	11	22	32,31,30,29,28,27,26,25,24,23,21,20,19,18,17,16,15,14,12,11,10,9	9	11	11	27	32	.	.	NOL6	11982	.		cg17049825	chr9:33523376	37443.5	ANKRD18B	.	ANKRD18B	CpG:_114_Shore_N		224	0.008155	0.26494	1.4907e-16	2.91234e-10		1	0.440273	1.66311e-09	0.19384
chr9:33237859-33237895	2	GT	19	12	28,27,26,25,24,23,22,21,20,19,18,17	17	21	21	21	28	.	.	SPINK4	2272	.		cg06923651	chr9:33240063	2186	SPINK4	.	SPINK4	.		244	0.019703	0.29634	3.1673e-20	6.18786e-14		1	0.480656	8.64041e-22	0.23103
chr9:33173592-33173631	2	GT	20	15	29,28,27,26,25,24,23,22,21,20,19,18,17,13,12	12	19	19	21	29	.	B4GALT1-AS1	B4GALT1-AS1	0	B4GALT1-AS1_intron		cg27012316	chr9:33130960	-42651.5	.	B4GALT1	B4GALT1	.		244	0.040894	0.30896	3.4705e-21	6.78021e-15		1	0.576281	3.55102e-37	0.3321
chr9:33173592-33173631	2	GT	20	15	29,28,27,26,25,24,23,22,21,20,19,18,17,13,12	12	19	19	21	29	.	B4GALT1-AS1	B4GALT1-AS1	0	B4GALT1-AS1_intron		cg13443165	chr9:33130377	-43234.5	.	B4GALT1	B4GALT1	.		245	-0.043029	0.40563	2.8163e-29	5.50212e-23		1	-0.650661	3.12684e-52	0.42336
chr9:33161022-33161046	2	CT	13	4	15,14,13,12	12	13	14	14	15	.	B4GALT1	B4GALT1	0	B4GALT1_intron		cg13443165	chr9:33130377	-30657	.	B4GALT1	B4GALT1	.		245	0.134541	0.25106	5.612e-17	1.0964e-10		1	0.546242	5.24207e-32	0.29838
chr9:33161022-33161046	2	CT	13	4	15,14,13,12	12	13	14	14	15	.	B4GALT1	B4GALT1	0	B4GALT1_intron		cg27012316	chr9:33130960	-30074	.	B4GALT1	B4GALT1	.		244	-0.171184	0.34269	7.7448e-24	1.51308e-17		1	-0.681557	5.41354e-60	0.46452
chr9:33157064-33157159	2	AC	48	15	57,56,55,54,53,52,51,50,49,48,47,46,45,44,40	40	48	49	53	57	.	B4GALT1	B4GALT1	0	B4GALT1_intron		cg27012316	chr9:33130960	-26151.5	.	B4GALT1	B4GALT1	.		209	0.028198	0.4322	3.035e-27	5.92939e-21		1	0.736322	3.89808e-67	0.54217
chr9:33157064-33157159	2	AC	48	15	57,56,55,54,53,52,51,50,49,48,47,46,45,44,40	40	48	49	53	57	.	B4GALT1	B4GALT1	0	B4GALT1_intron		cg13443165	chr9:33130377	-26734.5	.	B4GALT1	B4GALT1	.		210	-0.028817	0.46721	2.9318e-30	5.72777e-24		1	-0.620089	5.21799e-40	0.38451
chr9:33152310-33152370	5	AACAT	12	9	16,15,14,13,12,11,10,9,8	8	11	12	12	16	.	B4GALT1	B4GALT1	0	B4GALT1_intron		cg13443165	chr9:33130377	-21963	.	B4GALT1	B4GALT1	.		244	0.057899	0.15814	1.1344e-10	0.000221624		1	0.501029	2.17513e-25	0.25103
chr9:33152310-33152370	5	AACAT	12	9	16,15,14,13,12,11,10,9,8	8	11	12	12	16	.	B4GALT1	B4GALT1	0	B4GALT1_intron		cg27012316	chr9:33130960	-21380	.	B4GALT1	B4GALT1	.		243	-0.063893	0.1629	6.171e-11	0.000120561		1	-0.548224	1.46637e-32	0.30055
chr9:33135891-33135936	2	GT	24	12	31,29,28,27,26,25,24,23,22,21,20,17	17	24	27	27	31	.	B4GALT1	B4GALT1	0	B4GALT1_intron		cg27012316	chr9:33130960	-4953.5	.	B4GALT1	B4GALT1	.		244	-0.0461	0.3122	1.9575e-21	3.82431e-15		1	-0.437013	7.28017e-17	0.19098
chr9:33135891-33135936	2	GT	24	12	31,29,28,27,26,25,24,23,22,21,20,17	17	24	27	27	31	.	B4GALT1	B4GALT1	0	B4GALT1_intron		cg13443165	chr9:33130377	-5536.5	.	B4GALT1	B4GALT1	.		245	0.043305	0.3269	1.1474e-22	2.24164e-16		1	0.470595	1.0389e-20	0.22146
chr9:32547039-32547063	4	AAAC	6	3	7,6,5	5	5	5	6	7	.	TOPORS	TOPORS	0	TOPORS_intron		cg14286514	chr9:32525317	-21734	DDX58	DDX58	DDX58	CpG:_27_Shore_N		245	-0.101875	0.23959	3.6382e-16	7.10784e-10		1	-0.449933	4.67147e-19	0.20244
chr9:32547039-32547063	4	AAAC	6	3	7,6,5	5	5	5	6	7	.	TOPORS	TOPORS	0	TOPORS_intron		cg06034584	chr9:32566127	19076	.	NDUFB6,TOPORS-AS1	NDUFB6	CpG:_22_Shore_N		245	-0.093674	0.4495	2.4091e-33	4.70659e-27		1	-0.62235	1.259e-46	0.38732
chr9:32504039-32504068	2	AC	15	17	30,29,28,27,26,25,24,23,22,21,20,18,17,16,15,13,12	12	15	22	24	30	.	DDX58	DDX58	0	DDX58_intron		cg14286514	chr9:32525317	21263.5	DDX58	DDX58	DDX58	CpG:_27_Shore_N		244	0.016713	0.25701	2.4476e-17	4.7818e-11		1	0.497081	3.67062e-24	0.24709
chr9:29617563-29617589	2	AC	14	6	15,14,12,11,10,9	9	9	11	11	15	.	.	LINGO2	403963	.		cg06239287	chr9:29625423	7847	.	.	LINGO2	.		242	0.021558	0.15942	1.1234e-10	0.000219475		1	0.349056	8.03771e-09	0.12184
chr9:29288340-29288377	2	GT	20	5	23,22,21,20,18	18	20	21	21	23	.	.	LINGO2	74740	.		cg04331840	chr9:29285848	-2510.5	.	.	LINGO2	.		244	-0.031678	0.15748	1.2509e-10	0.000244385		1	-0.547138	7.70338e-32	0.29936
chr9:28920726-28920748	2	AC	12	4	14,13,12,11	11	11	11	12	14	.	LINGO2	LINGO2	0	LINGO2_intron		cg05117544	chr9:28952109	31372	.	LINGO2	LINGO2	.		240	-0.02161	0.19214	1.0893e-12	2.12813e-06		1	-0.319124	1.74268e-06	0.10184
chr9:27115504-27115527	4	AAAC	6	3	7,6,5	5	6	6	6	7	.	TEK	TEK	0	TEK_intron		cg08264401	chr9:27109073	-6442.5	TEK	.	TEK	.		243	-0.086826	0.26744	5.0794e-18	9.92347e-12		1	-0.483859	1.1577e-22	0.23412
chr9:248532-248640	4	CTTT	27	5	28,27,26,21,20	20	21	27	27	28	.	DOCK8	DOCK8	0	DOCK8_intron		cg14500300	chr9:211689	-36897	.	.	C9orf66	CpG:_112_Shelf_N		212	-0.013232	0.20006	7.9933e-12	1.56163e-05		1	-0.557432	3.77672e-28	0.31073
chr9:22411818-22411956	2	AT	70	9	70,68,67,66,65,63,59,58,57	57	58	68	70	70	.	.	DMRTA1	34868	.		cg20131155	chr9:22416596	4709	.	.	DMRTA1	.		232	0.005402	0.19369	2.0766e-12	4.05699e-06		1	0.532841	2.35091e-21	0.28392
chr9:22409915-22409964	2	AC	25	16	28,27,26,25,24,23,22,21,20,19,18,17,16,15,14,13	13	14	20	23	28	.	.	DMRTA1	36860	.		cg20131155	chr9:22416596	6656.5	.	.	DMRTA1	.		243	0.007103	0.21042	4.7701e-14	9.3192e-08		1	0.458017	1.45907e-19	0.20978
chr9:21962499-21962516	2	AT	9	16	26,24,23,22,21,20,19,18,17,16,15,14,13,12,10,9	9	9	9	16	26	.	.	CDKN2A-DT	4623	.		cg16606671	chr9:21971431	8923.5	.	CDKN2A	CDKN2A	CpG:_35_Shore_S		245	0.003306	0.14965	3.6119e-10	0.000705646		1	0.456585	3.25936e-18	0.20847
chr9:21787619-21787647	4	AAAT	7	6	12,11,10,9,8,7	7	7	7	7	12	.	.	MTAP	14989	.		cg25709906	chr9:21832670	45037	.	MTAP	MTAP	.		244	-0.050191	0.28751	1.4528e-19	2.83829e-13		1	-0.688019	2.07021e-62	0.47337
chr9:16418874-16418900	2	AC	18	11	27,26,25,24,23,22,21,20,19,18,17	17	18	20	22	27	.	BNC2	BNC2	0	BNC2_3utr		cg20779686	chr9:16421864	2977	.	BNC2	BNC2	.		245	0.007775	0.32155	3.0282e-22	5.9161e-16		1	0.685697	8.81991e-62	0.47018
chr9:16412708-16412766	2	AG	32	20	41,39,38,37,36,35,34,33,32,31,30,29,28,27,26,25,24,23,22,19	19	26	28	33	41	.	BNC2	BNC2	0	BNC2_3utr		cg20779686	chr9:16421864	9127	.	BNC2	BNC2	.		202	-0.00223	0.18468	1.7441e-10	0.00034074		1	-0.509676	8.61888e-23	0.25977
chr9:16400154-16400189	2	AC	18	13	25,24,23,22,21,20,19,18,17,16,15,14,8	8	17	22	23	25	.	.	BNC2	9314	.		cg20779686	chr9:16421864	21692.5	.	BNC2	BNC2	.		243	-0.003676	0.16112	8.013e-11	0.000156548		1	-0.512903	1.80947e-26	0.26307
chr9:15799136-15799166	2	AT	16	14	24,23,22,21,20,19,18,17,16,15,14,13,12,11	11	13	14	20	24	.	CCDC171	CCDC171	0	CCDC171_intron		cg06316310	chr9:15824846	25695	.	CCDC171	CCDC171	.		238	-0.003754	0.17511	1.659e-11	3.24114e-05		1	-0.421272	6.17284e-14	0.17747
chr9:14465573-14465608	2	AC	19	9	23,22,21,20,19,18,17,16,15	15	18	20	21	23	.	NFIB	NFIB	0	NFIB_intron		cg09846464	chr9:14465299	-291.5	.	.	NFIB	.		242	0.024603	0.37228	4.5134e-26	8.81769e-20		1	0.682957	1.68629e-60	0.46643
chr9:137836371-137836394	2	GT	13	4	24,15,14,13	13	13	13	13	24	.	.	EHMT1	246	.		cg13573295	chr9:137809946	-26436.5	.	EHMT1	EHMT1	CpG:_62_Island		237	-0.02142	0.28545	6.8058e-19	1.32963e-12		0	0	0	0
chr9:137795402-137795463	2	AC	31	19	45,44,43,42,41,40,39,38,37,36,35,34,33,32,31,27,26,25,16	16	26	39	42	45	.	EHMT1	EHMT1	0	EHMT1_intron		cg10615711	chr9:137781164	-14268.5	.	EHMT1	EHMT1	CpG:_31_Island		241	0.004646	0.25783	3.3623e-17	6.56882e-11		1	0.524185	3.61249e-28	0.27477
chr9:137795402-137795463	2	AC	31	19	45,44,43,42,41,40,39,38,37,36,35,34,33,32,31,27,26,25,16	16	26	39	42	45	.	EHMT1	EHMT1	0	EHMT1_intron		cg21197594	chr9:137762529	-32903.5	EHMT1-IT1	EHMT1	EHMT1	.		245	-0.005547	0.31783	5.912e-22	1.15501e-15		1	-0.674722	2.69092e-57	0.45525
chr9:137742291-137742332	2	N/A	23	15	31,30,29,28,27,26,25,24,23,22,21,20,18,17,11	11	22	23	26	31	.	EHMT1	EHMT1	0	EHMT1_intron		cg10615711	chr9:137781164	38852.5	.	EHMT1	EHMT1	CpG:_31_Island		241	-0.011127	0.20244	2.0573e-13	4.01929e-07		1	-0.386665	7.58945e-12	0.14951
chr9:137742291-137742332	2	N/A	23	15	31,30,29,28,27,26,25,24,23,22,21,20,18,17,11	11	22	23	26	31	.	EHMT1	EHMT1	0	EHMT1_intron		cg21197594	chr9:137762529	20217.5	EHMT1-IT1	EHMT1	EHMT1	.		245	0.013686	0.26493	5.6432e-18	1.1025e-11		1	0.535985	7.20775e-30	0.28728
chr9:137726088-137726108	2	GT	11	4	13,12,11,10	10	11	11	12	13	.	EHMT1	EHMT1	0	EHMT1_intron		cg21197594	chr9:137762529	36431	EHMT1-IT1	EHMT1	EHMT1	.		245	0.053414	0.225	3.7721e-15	7.36944e-09		1	0.468241	5.1025e-21	0.21925
chr9:137649459-137649490	4	AAAC	8	6	10,9,8,7,6,5	5	8	8	8	10	.	EHMT1	EHMT1	0	EHMT1_intron		cg08709962	chr9:137604570	-44904.5	ARRDC1	.	ARRDC1	CpG:_153_Shore_N		234	0.052833	0.15922	2.3523e-10	0.000459562		1	0.313579	1.09917e-05	0.098332
chr9:137611563-137611588	3	AAC	9	4	10,9,8,5	5	9	9	9	10	.	ARRDC1	ARRDC1	0	ARRDC1_intron		cg08709962	chr9:137604570	-7005.5	ARRDC1	.	ARRDC1	CpG:_153_Shore_N		234	0.082705	0.23457	3.6386e-15	7.10862e-09		1	0.45246	2.36128e-18	0.20472
chr9:137261980-137262005	2	AG	13	5	16,15,14,13,12	12	15	15	15	16	.	NELFB	NELFB	0	NELFB_intron		cg21174903	chr9:137252736	-9256.5	C9orf173,C9orf173-AS1	C9orf173,C9orf173-AS1	C9orf173	CpG:_117_Shelf_N		243	0.032396	0.30034	1.8904e-20	3.69322e-14		1	0.435224	2.09389e-17	0.18942
chr9:137261980-137262005	2	AG	13	5	16,15,14,13,12	12	15	15	15	16	.	NELFB	NELFB	0	NELFB_intron		cg14333086	chr9:137268249	6256.5	.	NELFB	NELFB	.		234	-0.091973	0.49229	5.2796e-36	1.03146e-29		1	-0.672949	1.01441e-56	0.45286
chr9:137119949-137119972	2	AT	12	7	15,14,13,12,11,9,8	8	8	8	11	15	.	.	DPP7	5217	.		cg03126904	chr9:137123803	3842.5	.	.	DPP7	.		244	0.032636	0.2442	1.9839e-16	3.87589e-10		1	0.657229	2.15457e-54	0.43195
chr9:137038261-137038288	2	CT/AT	15	4	16,15,14,12	12	12	15	15	16	.	.	NPDC1	1175	.		cg23203273	chr9:137032042	-6232.5	FUT7	C9orf139,FUT7	FUT7	CpG:_58_Shore_S		244	0.023735	0.15569	1.6248e-10	0.000317432		1	0.419988	2.40591e-15	0.17639
chr9:137038261-137038288	2	CT/AT	15	4	16,15,14,12	12	12	15	15	16	.	.	NPDC1	1175	.		cg13757845	chr9:137032288	-5986.5	FUT7	C9orf139,FUT7	FUT7	CpG:_58_Shore_S		245	0.015278	0.17218	1.2927e-11	2.52551e-05		1	0.521555	3.95171e-28	0.27202
chr9:137004832-137004857	2	CT	16	3	16,15,14	14	14	14	16	16	.	.	ABCA2	2377	.		cg12389126	chr9:136981764	-23080.5	LCNL1	.	PTGDS	CpG:_88_Shelf_N,CpG:_92_Shelf_S		242	-0.060352	0.3537	1.5341e-24	2.99713e-18		1	-0.621369	6.91961e-46	0.3861
chr9:137004832-137004857	2	CT	16	3	16,15,14	14	14	14	16	16	.	.	ABCA2	2377	.		cg19285473	chr9:136981832	-23012.5	LCNL1	.	PTGDS	CpG:_88_Shelf_N,CpG:_92_Shelf_S		242	-0.04602	0.38577	3.2753e-27	6.39886e-21		1	-0.629174	1.96861e-47	0.39586
chr9:136569398-136569439	2	GT	23	3	23,22,15	15	22	22	23	23	.	.	NALT1	19655	.		cg14424963	chr9:136578447	9028.5	.	.	NALT1	.		245	-0.04818	0.20241	1.3033e-13	2.54622e-07		1	-0.554581	1.90701e-33	0.30756
chr9:135927967-135927983	2	AC	13	3	15,14,13	13	13	13	15	15	.	.	UBAC1	4986	.		cg00655706	chr9:135960345	32370	UBAC1	UBAC1	UBAC1	CpG:_73_Shore_N		236	0.027395	0.20625	2.0702e-13	4.04449e-07		1	0.437264	7.61607e-17	0.1912
chr9:135927905-135927916	2	AC	9	4	9,8,7,6	6	6	9	9	9	.	.	UBAC1	5053	.		cg00655706	chr9:135960345	32434.5	UBAC1	UBAC1	UBAC1	CpG:_73_Shore_N		242	-0.017503	0.18813	1.6031e-12	3.13193e-06		1	-0.428894	2.6872e-16	0.18395
chr9:135642599-135642648	2	CT/GT	26	8	27,26,25,24,23,22,20,19	19	22	23	25	27	.	.	GLT6D1	3060	.		cg13555662	chr9:135662858	20234.5	LCN9	.	LCN9	.		244	-0.020328	0.17395	1.0934e-11	2.13614e-05		1	-0.349256	1.2276e-08	0.12198
chr9:135332241-135332283	2	GT	22	13	26,25,24,23,22,21,20,19,18,17,15,13,12	12	12	21	21	26	.	.	C9orf62	10966	.		cg11776763	chr9:135332151	-111	.	.	C9orf62	.		244	-0.0062	0.1665	3.3106e-11	6.46782e-05		1	-0.484242	1.55033e-22	0.23449
chr9:135107132-135107174	5	CTGGG	9	4	10,9,8,6	6	6	6	6	10	.	OLFM1	OLFM1	0	OLFM1_intron		cg14549951	chr9:135107124	-29	.	OLFM1	OLFM1	CpG:_17_Shore_S		244	-0.030399	0.22592	3.715e-15	7.25788e-09		1	-0.522944	1.52106e-28	0.27347
chr9:134932820-134932843	2	AC	12	7	15,14,13,12,11,10,8	8	12	12	13	15	.	.	FCN1	14909	.		cg18597176	chr9:134930626	-2205.5	.	.	FCN1	.		244	0.033267	0.18603	1.7808e-12	3.4791e-06		1	0.4687	5.06688e-21	0.21968
chr9:134388283-134388305	2	GT	12	8	27,25,24,23,22,21,20,12	12	22	22	22	27	.	RXRA	RXRA	0	RXRA_intron		cg00753924	chr9:134406967	18673	RXRA	RXRA	RXRA	CpG:_21_Shore_N		244	-0.029547	0.54828	1.196e-43	2.33659e-37		1	-0.722246	2.41726e-70	0.52164
chr9:134089773-134089858	2	GT/AG	44	12	49,46,45,44,43,42,41,40,39,38,37,36	36	42	43	44	49	.	.	BRD3	21748	.		cg14434109	chr9:134054549	-35266.5	LOC100130548	BRD3,LOC100130548	LOC100130548	CpG:_19_Shore_S		238	-0.024562	0.15998	1.4787e-10	0.000288889		1	-0.449222	8.67702e-18	0.2018
chr9:134042793-134042819	2	AC	15	6	15,14,13,12,11,8	8	11	14	14	15	.	BRD3	BRD3	0	BRD3_intron		cg14472181	chr9:134056087	13281	LOC100130548	BRD3,LOC100130548	LOC100130548	CpG:_19_Shore_S		240	-0.025305	0.17148	2.3201e-11	4.53271e-05		1	-0.535378	1.25213e-29	0.28663
chr9:134042793-134042819	2	AC	15	6	15,14,13,12,11,8	8	11	14	14	15	.	BRD3	BRD3	0	BRD3_intron		cg14434109	chr9:134054549	11743	LOC100130548	BRD3,LOC100130548	LOC100130548	CpG:_19_Shore_S		234	-0.053683	0.53749	1.0131e-40	1.97926e-34		1	-0.744735	2.35423e-76	0.55463
chr9:134042647-134042765	2	AC/AT	62	12	64,63,62,61,60,59,58,57,56,55,54,53	53	54	62	62	64	.	BRD3	BRD3	0	BRD3_intron		cg14472181	chr9:134056087	13381	LOC100130548	BRD3,LOC100130548	LOC100130548	CpG:_19_Shore_S		231	-0.010396	0.1806	1.5141e-11	2.95805e-05		1	-0.547092	1.96118e-30	0.29931
chr9:134042647-134042765	2	AC/AT	62	12	64,63,62,61,60,59,58,57,56,55,54,53	53	54	62	62	64	.	BRD3	BRD3	0	BRD3_intron		cg14434109	chr9:134054549	11843	LOC100130548	BRD3,LOC100130548	LOC100130548	CpG:_19_Shore_S		224	-0.022053	0.55355	9.5593e-41	1.86757e-34		1	-0.75032	6.6855e-76	0.56298
chr9:133940673-133940708	2	GT	21	15	31,30,29,28,27,26,25,24,23,22,21,20,19,18,14	14	19	22	24	31	.	VAV2	VAV2	0	VAV2_intron		cg19324472	chr9:133939723	-967.5	.	VAV2	VAV2	.		240	0.006263	0.18045	6.2071e-12	1.21266e-05		1	0.37272	1.76216e-10	0.13892
chr9:133720647-133720658	2	AG	6	4	8,7,6,4	4	6	6	7	8	.	SARDH	SARDH	0	SARDH_intron		cg14255237	chr9:133707256	-13396.5	.	SARDH	SARDH	.		243	-0.190692	0.17539	9.742e-12	1.90327e-05		1	-0.449989	5.77587e-19	0.20249
chr9:133700716-133700753	2	AC	22	5	24,23,22,21,19	19	21	22	22	24	.	SARDH	SARDH	0	SARDH_intron		cg01283420	chr9:133667139	-33595.5	.	SARDH	SARDH	.		243	-0.09108	0.25001	8.9271e-17	1.74406e-10		1	-0.450411	6.46411e-19	0.20287
chr9:133700716-133700753	2	AC	22	5	24,23,22,21,19	19	21	22	22	24	.	SARDH	SARDH	0	SARDH_intron		cg03371378	chr9:133703539	2804.5	.	SARDH	SARDH	CpG:_24_Shore_S,CpG:_37_Shore_S		245	0.067038	0.29963	1.4922e-20	2.91527e-14		1	0.560901	9.42437e-35	0.31461
chr9:133700716-133700753	2	AC	22	5	24,23,22,21,19	19	21	22	22	24	.	SARDH	SARDH	0	SARDH_intron		cg03810616	chr9:133680742	-19992.5	.	SARDH	SARDH	.		244	0.278133	0.31493	1.2041e-21	2.35241e-15		0	0	0	0
chr9:133700716-133700753	2	AC	22	5	24,23,22,21,19	19	21	22	22	24	.	SARDH	SARDH	0	SARDH_intron		cg13458384	chr9:133702217	1482.5	.	SARDH	SARDH	CpG:_24_Shore_S,CpG:_37_Shore_N		244	0.072417	0.35618	6.177e-25	1.20678e-18		1	0.534537	1.86368e-30	0.28573
chr9:133700716-133700753	2	AC	22	5	24,23,22,21,19	19	21	22	22	24	.	SARDH	SARDH	0	SARDH_intron		cg05493344	chr9:133701942	1207.5	.	SARDH	SARDH	CpG:_24_Shore_S,CpG:_37_Shore_N		245	0.101051	0.38479	1.9043e-27	3.72037e-21		1	0.510069	8.56153e-27	0.26017
chr9:133700716-133700753	2	AC	22	5	24,23,22,21,19	19	21	22	22	24	.	SARDH	SARDH	0	SARDH_intron		cg13717350	chr9:133701869	1134.5	.	SARDH	SARDH	CpG:_24_Shore_S,CpG:_37_Shore_N		244	0.257352	0.4853	9.1769e-37	1.79286e-30		1	0.81201	7.325e-107	0.65936
chr9:133700716-133700753	2	AC	22	5	24,23,22,21,19	19	21	22	22	24	.	SARDH	SARDH	0	SARDH_intron		cg14255237	chr9:133707256	6521.5	.	SARDH	SARDH	.		243	0.29531	0.52319	1.2293e-40	2.40165e-34		1	0.828106	1.07758e-115	0.68576
chr9:133654098-133654131	5	ATTTT	9	4	12,11,10,9	9	9	9	11	12	.	DBH	DBH	0	DBH_intron		cg03810616	chr9:133680742	26627.5	.	SARDH	SARDH	.		244	-0.129215	0.16921	2.2165e-11	4.33031e-05		0	0	0	0
chr9:133654098-133654131	5	ATTTT	9	4	12,11,10,9	9	9	9	11	12	.	DBH	DBH	0	DBH_intron		cg01283420	chr9:133667139	13024.5	.	SARDH	SARDH	.		243	0.051704	0.19627	4.1976e-13	8.20073e-07		1	0.462266	1.18955e-19	0.21369
chr9:133263201-133263234	3	GTT	11	3	12,11,6	6	6	11	11	12	.	ABO	ABO	0	ABO_intron		cg24072567	chr9:133276155	12950.5	ABO	.	ABO	CpG:_145_Shore_S		243	0.023117	0.18818	1.4302e-12	2.79414e-06		1	0.462407	7.94688e-20	0.21382
chr9:133263201-133263234	3	GTT	11	3	12,11,6	6	6	11	11	12	.	ABO	ABO	0	ABO_intron		cg06818865	chr9:133276506	13337.5	ABO	.	ABO	CpG:_145_Shore_S		245	0.005924	0.19084	7.7133e-13	1.50692e-06		1	0.544252	4.49334e-31	0.29621
chr9:133263201-133263234	3	GTT	11	3	12,11,6	6	6	11	11	12	.	ABO	ABO	0	ABO_intron		cg17813872	chr9:133257464	-5769.5	.	ABO	ABO	CpG:_69_Shore_S		235	-0.039514	0.31793	4.0144e-21	7.84281e-15		1	-0.560776	9.67317e-34	0.31447
chr9:132045414-132045463	2	AC	27	9	30,29,28,27,26,25,24,23,22	22	24	26	26	30	.	MED27	MED27	0	MED27_intron		cg16669300	chr9:132007076	-38362.5	.	MED27	MED27	.		245	0.047575	0.18527	1.7998e-12	3.51622e-06		1	0.374793	5.36637e-11	0.14047
chr9:131979832-131979862	4	CTGG	8	6	13,12,11,10,9,8	8	9	11	11	13	.	MED27	MED27	0	MED27_intron		cg10772782	chr9:131980432	585	.	MED27	MED27	.		245	-0.018795	0.15278	2.2839e-10	0.000446199		1	-0.514743	2.86591e-27	0.26496
chr9:131979832-131979862	4	CTGG	8	6	13,12,11,10,9,8	8	9	11	11	13	.	MED27	MED27	0	MED27_intron		cg21799585	chr9:132003375	23528	.	MED27	MED27	.		243	0.027394	0.19289	7.0154e-13	1.37058e-06		1	0.354486	3.6853e-09	0.12566
chr9:131979832-131979862	4	CTGG	8	6	13,12,11,10,9,8	8	9	11	11	13	.	MED27	MED27	0	MED27_intron		cg04152446	chr9:131981642	1795	.	MED27	MED27	.		245	-0.037821	0.24036	3.2134e-16	6.27792e-10		1	-0.628896	3.74383e-47	0.39551
chr9:131979832-131979862	4	CTGG	8	6	13,12,11,10,9,8	8	9	11	11	13	.	MED27	MED27	0	MED27_intron		cg16669300	chr9:132007076	27229	.	MED27	MED27	.		245	0.072253	0.37287	1.9918e-26	3.89132e-20		1	0.63871	1.25097e-49	0.40795
chr9:131761959-131761990	2	GT	16	12	23,22,21,20,19,18,17,16,15,14,13,10	10	13	15	15	23	.	.	RAPGEF1	22016	.		cg07709065	chr9:131762004	29.5	.	.	RAPGEF1	CpG:_35_Shore_N		245	-0.011299	0.272	1.7197e-18	3.35973e-12		1	-0.410707	1.38498e-14	0.16868
chr9:131333295-131333329	6	GTTTTT	6	4	8,7,6,5	5	6	6	7	8	.	.	PLPP7	24035	.		cg05967736	chr9:131309269	-24043	.	.	PLPP7	CpG:_29_Shore_S		240	0.033338	0.1973	5.016e-13	9.79961e-07		1	0.483498	1.68974e-22	0.23377
chr9:131332070-131332108	5	GTTTT	8	3	9,8,6	6	6	6	8	9	.	.	PLPP7	22810	.		cg05967736	chr9:131309269	-22820	.	.	PLPP7	CpG:_29_Shore_S		175	0.020943	0.22347	3.9654e-11	7.74708e-05		1	0.516778	2.85084e-19	0.26706
chr9:131072141-131072155	4	AGGG	5	3	8,7,5	5	7	7	7	8	.	LAMC3	LAMC3	0	LAMC3_intron		cg03776060	chr9:131097188	25040	AIF1L	AIF1L	AIF1L	CpG:_101_Island		244	-0.042392	0.21549	1.9176e-14	3.74636e-08		1	-0.390333	4.10283e-05	0.15236
chr9:130448423-130448445	2	AC	13	10	24,20,19,18,17,16,14,13,12,10	10	12	13	18	24	.	ASS1	ASS1	0	ASS1_intron		cg27371952	chr9:130448461	27	.	ASS1	ASS1	CpG:_81_Shelf_S		222	-0.00505	0.24825	2.4828e-15	4.85057e-09		0	0	0	0
chr9:130169987-130170037	2	GT	26	5	27,26,25,24,22	22	26	26	26	27	.	.	NCS1	2367	.		cg05251000	chr9:130173385	3373	NCS1	NCS1	NCS1	CpG:_23_Shore_S,CpG:_58_Shore_S		243	-0.025343	0.15873	1.1379e-10	0.000222308		1	-0.445421	1.76639e-18	0.1984
chr9:129569211-129569241	6	CCGGGG	6	3	7,6,4	4	6	6	6	7	.	.	NTMT1	39643	.		cg00220243	chr9:129567856	-1370	.	.	NTMT1	CpG:_24_Shore_N		244	0.10719	0.26046	1.3836e-17	2.7031e-11		1	0.577339	8.27182e-38	0.33332
chr9:129462301-129462351	5	AAAAG	11	4	12,11,10,9	9	9	10	11	12	.	.	LINC00963	26309	.		cg14854366	chr9:129489230	26904	LINC00963	LINC00963	LINC00963	CpG:_63_Shore_S		245	0.03892	0.16467	3.9581e-11	7.73282e-05		1	0.413896	1.1183e-13	0.17131
chr9:129462301-129462351	5	AAAAG	11	4	12,11,10,9	9	9	10	11	12	.	.	LINC00963	26309	.		cg13523245	chr9:129491105	28779	.	LINC00963	LINC00963	CpG:_63_Shelf_S		245	0.030262	0.23548	7.066e-16	1.38046e-09		1	0.546242	6.44532e-30	0.29838
chr9:129437023-129437060	2	GT/CG	22	3	22,21,19	19	21	21	21	22	.	.	LINC00963	51600	.		cg02016195	chr9:129436543	-498.5	.	.	LINC00963	CpG:_59_Shore_N		244	-0.118112	0.22715	3.0542e-15	5.9669e-09		1	-0.557683	1.8876e-34	0.31101
chr9:129411218-129411243	4	ATTT	8	3	10,9,8	8	8	8	9	10	.	.	LINC01503	63742	.		cg13571972	chr9:129415069	3838.5	.	.	LINC01503	CpG:_113_Shore_S		245	0.084233	0.21929	9.3211e-15	1.82104e-08		1	0.484376	2.58502e-23	0.23462
chr9:129407994-129408037	2	AC	22	7	33,28,26,25,24,23,22	22	22	22	23	33	.	.	LINC01503	60518	.		cg13571972	chr9:129415069	7053.5	.	.	LINC01503	CpG:_113_Shore_S		245	0.036334	0.17705	6.2317e-12	1.21747e-05		1	0.53768	3.58097e-31	0.2891
chr9:129389404-129389435	2	GT	16	10	20,19,18,17,16,15,14,13,12,11	11	14	14	16	20	.	.	LINC01503	41928	.		cg04410368	chr9:129392815	3395.5	.	.	LINC01503	.		245	0.048602	0.54739	1.0192e-43	1.99118e-37		1	0.726223	2.28298e-73	0.5274
chr9:129188808-129188870	4	N/A	16	11	24,23,22,21,20,19,18,17,16,15,14	14	16	17	20	24	.	.	IER5L	10548	.		cg14082660	chr9:129168011	-20828	.	.	IER5L	.		243	-0.005021	0.1972	3.6422e-13	7.11566e-07		1	-0.428684	3.85286e-16	0.18377
chr9:129183404-129183435	4	ATTC	8	4	10,9,8,7	7	8	9	9	10	.	.	IER5L	5144	.		cg14082660	chr9:129168011	-15408.5	.	.	IER5L	.		243	0.021494	0.16901	2.5091e-11	4.90195e-05		1	0.428987	1.2826e-16	0.18403
chr9:129025607-129025655	4	AAGG/AGGC	12	9	23,22,21,20,19,18,17,13,12	12	12	15	21	23	.	SH3GLB2	SH3GLB2	0	SH3GLB2_intron		cg03722198	chr9:129029467	3836	SH3GLB2	.	SH3GLB2	CpG:_34_Shore_S		244	0.007402	0.17003	1.9623e-11	3.83369e-05		1	0.483073	2.85671e-22	0.23336
chr9:128847646-128847683	3	AAC	13	4	15,14,13,12	12	13	13	14	15	KYAT1	KYAT1	KYAT1	0	KYAT1_intron		cg14439753	chr9:128815745	-31919.5	.	.	ENDOG	CpG:_126_Shelf_N		245	-0.045412	0.14908	3.9253e-10	0.000766874		1	-0.466187	3.85971e-21	0.21733
chr9:128832898-128832938	3	AAC	14	11	19,18,17,16,15,14,13,12,11,10,9	9	9	9	15	19	.	.	KYAT1	4	.		cg14439753	chr9:128815745	-17173	.	.	ENDOG	CpG:_126_Shelf_N		245	-0.012897	0.32575	1.4141e-22	2.76268e-16		1	-0.562779	5.45876e-35	0.31672
chr9:128832522-128832547	2	AC	13	4	16,15,14,13	13	13	15	15	16	.	.	KYAT1	395	.		cg14439753	chr9:128815745	-16789.5	.	.	ENDOG	CpG:_126_Shelf_N		244	0.040524	0.35271	1.1911e-24	2.32702e-18		1	0.578861	1.50141e-37	0.33508
chr9:128813543-128813577	4	AAAT	10	7	15,14,13,12,11,10,9	9	9	11	12	15	.	.	TBC1D13	3112	.		cg14439753	chr9:128815745	2185	.	.	ENDOG	CpG:_126_Shelf_N		245	0.026436	0.26345	7.2149e-18	1.40955e-11		1	0.532053	6.32161e-30	0.28308
chr9:128812691-128812717	4	ATTT	7	5	11,10,9,8,7	7	7	9	9	11	.	.	TBC1D13	2260	.		cg14439753	chr9:128815745	3041	.	.	ENDOG	CpG:_126_Shelf_N		245	0.040208	0.36168	1.7338e-25	3.38727e-19		1	0.587026	8.93618e-40	0.3446
chr9:128210349-128210379	3	ATT	10	8	17,16,15,14,13,12,11,10	10	10	13	13	17	.	DNM1	DNM1	0	DNM1_intron		cg19686849	chr9:128211295	931	.	DNM1	DNM1	.		236	-0.015567	0.16294	1.1594e-10	0.000226508		1	-0.453486	2.80171e-19	0.20565
chr9:128210349-128210379	3	ATT	10	8	17,16,15,14,13,12,11,10	10	10	13	13	17	.	DNM1	DNM1	0	DNM1_intron		cg13642260	chr9:128193101	-17263	CIZ1	CIZ1	CIZ1	CpG:_41_Island		244	0.046609	0.25794	2.0981e-17	4.099e-11		1	0.595071	5.08215e-41	0.35411
chr9:128210349-128210379	3	ATT	10	8	17,16,15,14,13,12,11,10	10	10	13	13	17	.	DNM1	DNM1	0	DNM1_intron		cg10071929	chr9:128192856	-17508	CIZ1	CIZ1	CIZ1	CpG:_41_Shore_N,CpG:_72_Shore_S		244	0.063518	0.33162	5.9386e-23	1.16021e-16		1	0.612405	3.00724e-44	0.37504
chr9:128210349-128210379	3	ATT	10	8	17,16,15,14,13,12,11,10	10	10	13	13	17	.	DNM1	DNM1	0	DNM1_intron		cg09976142	chr9:128193157	-17207	CIZ1	CIZ1	CIZ1	CpG:_41_Island		243	0.073748	0.35974	3.9391e-25	7.6957e-19		1	0.658141	1.72192e-54	0.43315
chr9:128183749-128183784	4	GTTT	9	4	10,9,8,7	7	8	8	9	10	.	CIZ1	CIZ1	0	CIZ1_intron		cg13642260	chr9:128193101	9334.5	CIZ1	CIZ1	CIZ1	CpG:_41_Island		245	-0.117881	0.16014	7.7355e-11	0.000151126		1	-0.672711	2.28474e-58	0.45254
chr9:128183749-128183784	4	GTTT	9	4	10,9,8,7	7	8	8	9	10	.	CIZ1	CIZ1	0	CIZ1_intron		cg09976142	chr9:128193157	9390.5	CIZ1	CIZ1	CIZ1	CpG:_41_Island		244	-0.177936	0.20412	1.1241e-13	2.19612e-07		1	-0.726994	8.89077e-74	0.52852
chr9:128183749-128183784	4	GTTT	9	4	10,9,8,7	7	8	8	9	10	.	CIZ1	CIZ1	0	CIZ1_intron		cg10071929	chr9:128192856	9089.5	CIZ1	CIZ1	CIZ1	CpG:_41_Shore_N,CpG:_72_Shore_S		245	-0.16028	0.20561	7.9358e-14	1.55039e-07		1	-0.700956	9.76086e-66	0.49134
chr9:128154271-128154325	6	AGGGTT/AACCCT	9	3	10,9,8	8	8	9	9	10	.	.	LCN2	819	.		cg13642260	chr9:128193101	38803	CIZ1	CIZ1	CIZ1	CpG:_41_Island		239	0.136391	0.15382	3.277e-10	0.000640218		1	0.541406	9.12292e-32	0.29312
chr9:128154271-128154325	6	AGGGTT/AACCCT	9	3	10,9,8	8	8	9	9	10	.	.	LCN2	819	.		cg10071929	chr9:128192856	38558	CIZ1	CIZ1	CIZ1	CpG:_41_Shore_N,CpG:_72_Shore_S		239	0.201361	0.23024	3.632e-15	7.09573e-09		1	0.576463	1.46065e-37	0.33231
chr9:128154271-128154325	6	AGGGTT/AACCCT	9	3	10,9,8	8	8	9	9	10	.	.	LCN2	819	.		cg09976142	chr9:128193157	38859	CIZ1	CIZ1	CIZ1	CpG:_41_Island		238	0.231242	0.23971	9.4471e-16	1.84565e-09		1	0.578921	4.27587e-38	0.33515
chr9:128104832-128104869	3	ATT	14	8	17,16,15,14,13,12,11,10	10	12	12	12	17	.	SLC25A25	SLC25A25	0	SLC25A25_intron		cg11884704	chr9:128092034	-12816.5	SLC25A25	SLC25A25	SLC25A25	.		245	-0.032555	0.15549	1.5358e-10	0.000300045		1	-0.527181	4.12514e-29	0.27792
chr9:128104832-128104869	3	ATT	14	8	17,16,15,14,13,12,11,10	10	12	12	12	17	.	SLC25A25	SLC25A25	0	SLC25A25_intron		cg14294859	chr9:128100277	-4573.5	SLC25A25	SLC25A25	SLC25A25	.		244	-0.086464	0.18427	2.3245e-12	4.54131e-06		1	-0.539166	8.28004e-31	0.2907
chr9:128076048-128076074	5	ATTTT	5	3	7,6,5	5	5	5	5	7	.	SLC25A25	SLC25A25	0	SLC25A25_intron		cg03724308	chr9:128098304	22243	SLC25A25	SLC25A25	SLC25A25	.		245	0.047441	0.16217	5.7326e-11	0.000111996		1	0.495096	7.01318e-25	0.24512
chr9:128076048-128076074	5	ATTTT	5	3	7,6,5	5	5	5	5	7	.	SLC25A25	SLC25A25	0	SLC25A25_intron		cg14294859	chr9:128100277	24216	SLC25A25	SLC25A25	SLC25A25	.		244	0.301374	0.32905	9.4742e-23	1.85095e-16		1	0.596506	3.35449e-41	0.35582
chr9:127919912-127919955	5	AAAAT	9	6	11,10,9,8,7,6	6	9	9	9	11	.	.	PIP5KL1	926	.		cg00133391	chr9:127931259	11325.5	PIP5KL1	.	PIP5KL1	CpG:_55_Shore_S		245	-0.027914	0.1627	5.3019e-11	0.000103582		0	0	0	0
chr9:127801457-127801475	2	GT	10	3	11,10,8	8	8	10	10	11	FPGS	.	FPGS	1383	.		cg03883921	chr9:127809990	8524	.	FPGS	FPGS	.		244	0.133912	0.6034	1.6557e-50	3.23469e-44		1	0.720985	3.092e-71	0.51982
chr9:127605452-127605478	4	GTTT	7	4	8,7,6,5	5	7	7	8	8	.	.	STXBP1	6799	.		cg10038635	chr9:127562296	-43169	.	FAM129B	FAM129B	.		245	0.068108	0.15112	2.9146e-10	0.000569417		1	0.43795	1.14417e-17	0.1918
chr9:127556457-127556493	4	ATTC	9	4	10,9,8,7	7	8	9	9	10	.	NIBAN2	NIBAN2	0	NIBAN2_intron		cg05514971	chr9:127567309	10834	FAM129B	FAM129B	FAM129B	CpG:_33_Shore_N,CpG:_65_Shore_N		243	-0.0582	0.14971	4.2252e-10	0.000825465		1	-0.328649	2.75434e-07	0.10801
chr9:127439181-127439222	2	AC	22	5	24,23,22,21,20	20	20	20	22	24	.	ZNF79	ZNF79	0	ZNF79_intron		cg13773818	chr9:127423541	-15660.5	ZNF79	.	ZNF79	CpG:_66_Shore_N		235	-0.042049	0.1563	3.2542e-10	0.000635763		0	0	0	0
chr9:127368930-127368954	5	AAAAC	5	3	7,6,5	5	5	5	6	7	.	GARNL3	GARNL3	0	GARNL3_intron		cg06326800	chr9:127354139	-14803	.	GARNL3	GARNL3	.		245	-0.116929	0.31209	1.6502e-21	3.22395e-15		1	-0.52192	1.84387e-28	0.2724
chr9:127361272-127361294	2	AG	12	3	14,13,12	12	12	12	12	14	.	GARNL3	GARNL3	0	GARNL3_intron		cg06843131	chr9:127396011	34728	SLC2A8	.	SLC2A8	CpG:_121_Shore_N,CpG:_22_Shore_N		242	-0.090356	0.2317	1.9354e-15	3.78113e-09		1	-0.531357	4.15529e-30	0.28234
chr9:127073447-127073487	2	GT	21	14	31,30,29,28,27,26,25,24,22,21,19,18,17,10	10	21	21	29	31	.	RALGPS1	RALGPS1	0	RALGPS1_intron		cg20910519	chr9:127092351	18884	.	ANGPTL2,RALGPS1	RALGPS1	.		244	0.007519	0.20445	1.0682e-13	2.08691e-07		1	0.55727	1.63103e-32	0.31055
chr9:127071114-127071131	2	AT	9	4	10,9,8,7	7	7	9	9	10	.	RALGPS1	RALGPS1	0	RALGPS1_intron		cg20910519	chr9:127092351	21228.5	.	ANGPTL2,RALGPS1	RALGPS1	.		244	-0.036918	0.29858	2.146e-20	4.19258e-14		1	-0.562139	1.24422e-34	0.316
chr9:127071024-127071051	2	CT/AT	14	4	17,16,15,14	14	14	14	15	17	.	RALGPS1	RALGPS1	0	RALGPS1_intron		cg20910519	chr9:127092351	21313.5	.	ANGPTL2,RALGPS1	RALGPS1	.		244	0.057589	0.26748	4.3061e-18	8.4127e-12		1	0.526279	3.40519e-28	0.27697
chr9:127055201-127055240	4	ATCT/CTGT	10	6	13,12,11,10,9,8	8	8	10	11	13	.	RALGPS1	RALGPS1	0	RALGPS1_intron		cg20910519	chr9:127092351	37130.5	.	ANGPTL2,RALGPS1	RALGPS1	.		242	-0.01951	0.19286	7.8646e-13	1.53648e-06		1	-0.459162	7.4444e-20	0.21083
chr9:127054997-127055040	2	AG	25	18	33,32,31,30,29,28,27,26,25,24,23,22,21,20,19,18,17,13	13	13	23	25.75	33	.	RALGPS1	RALGPS1	0	RALGPS1_intron		cg20910519	chr9:127092351	37332.5	.	ANGPTL2,RALGPS1	RALGPS1	.		244	-0.004909	0.21624	1.7064e-14	3.33374e-08		1	-0.481259	2.39319e-21	0.23161
chr9:127045731-127045797	2	AC	34	14	36,35,34,33,32,31,30,29,28,27,26,25,24,22	22	30	31.5	33.25	36	.	RALGPS1	RALGPS1	0	RALGPS1_intron		cg20910519	chr9:127092351	46587	.	ANGPTL2,RALGPS1	RALGPS1	.		241	-0.009987	0.14991	4.8512e-10	0.000947764		1	-0.351895	7.95687e-09	0.12383
chr9:126952629-126952701	2	AG/GT	39	18	49,48,47,46,45,44,43,42,41,40,39,38,37,36,35,34,33,30	30	39	39	45	49	.	RALGPS1	RALGPS1	0	RALGPS1_intron		cg08433538	chr9:126914435	-38230	RALGPS1	.	RALGPS1	CpG:_23_Shore_N,CpG:_71_Shore_N		241	0.011644	0.35687	1.0573e-24	2.06562e-18		1	0.54495	2.92816e-30	0.29697
chr9:126668444-126668469	3	ATT	9	11	20,18,17,16,15,14,13,12,11,10,9	9	9	9	12	20	.	LMX1B	LMX1B	0	LMX1B_intron		cg04048392	chr9:126681569	13112.5	.	LMX1B	LMX1B	CpG:_38_Shore_N		243	0.02849	0.24767	1.3038e-16	2.54719e-10		1	0.396497	4.07445e-13	0.15721
chr9:126410142-126410173	2	GT	18	9	22,21,20,19,18,17,16,15,14	14	17	17	19	22	NRON	MVB12B,NRON	MVB12B,NRON	0	MVB12B_intron,NRON_3utr		cg09518226	chr9:126411869	1711.5	NRON	MVB12B	MVB12B	.		245	0.08576	0.37578	1.1275e-26	2.20276e-20		1	0.6805	1.02502e-59	0.46308
chr9:126409300-126409346	2	GT	26	15	31,30,29,28,27,26,25,24,23,22,21,20,18,16,15	15	21	26	27	31	NRON	MVB12B,NRON	MVB12B,NRON	0	MVB12B_intron,NRON_3utr		cg09518226	chr9:126411869	2546	NRON	MVB12B	MVB12B	.		244	-0.036971	0.32036	4.5604e-22	8.90952e-16		1	-0.608235	1.36233e-41	0.36995
chr9:126336755-126336781	2	AC	14	8	21,20,19,18,17,16,15,14	14	15	15	17	21	.	MVB12B	MVB12B	0	MVB12B_intron		cg21354140	chr9:126317630	-19138	.	.	MVB12B	.		244	0.031145	0.22398	5.0512e-15	9.86838e-09		0	0	0	0
chr9:125975970-125975997	5	AAAAT	6	5	10,9,8,7,6	6	6	9	9	10	.	.	PBX3	8595	.		cg07715621	chr9:125953779	-22204.5	.	PBX3	PBX3	.		244	-0.117577	0.65233	1.9158e-57	3.74284e-51		1	-0.791524	1.03457e-96	0.62651
chr9:125970219-125970277	2	GT	30	13	32,31,30,29,28,27,26,25,24,23,22,19,18	18	18	18	28	32	.	.	PBX3	2844	.		cg07715621	chr9:125953779	-16469	.	PBX3	PBX3	.		244	0.032244	0.67575	4.0771e-61	7.96531e-55		1	0.782208	2.94206e-89	0.61185
chr9:125948706-125948736	2	GT/AT	16	3	18,17,16	16	16	17	17	18	.	PBX3	PBX3	0	PBX3_intron		cg07715621	chr9:125953779	5058	.	PBX3	PBX3	.		244	-0.325547	0.63532	6.2846e-55	1.2278e-48		1	-0.798711	3.15836e-101	0.63794
chr9:125885799-125885819	2	GT	11	4	12,11,10,9	9	10	10	11	12	.	PBX3	PBX3	0	PBX3_intron		cg00238698	chr9:125842686	-43123	.	PBX3	PBX3	.		245	0.030596	0.18959	9.3426e-13	1.82524e-06		1	0.682158	2.74338e-60	0.46534
chr9:125885799-125885819	2	GT	11	4	12,11,10,9	9	10	10	11	12	.	PBX3	PBX3	0	PBX3_intron		cg15044533	chr9:125886543	734	.	PBX3	PBX3	.		245	0.062584	0.19828	2.4657e-13	4.81716e-07		1	0.649938	2.01285e-52	0.42242
chr9:125885799-125885819	2	GT	11	4	12,11,10,9	9	10	10	11	12	.	PBX3	PBX3	0	PBX3_intron		cg11654592	chr9:125840364	-45445	.	PBX3	PBX3	.		234	0.049323	0.26688	2.2957e-17	4.48504e-11		1	0.667997	2.87413e-56	0.44622
chr9:125885799-125885819	2	GT	11	4	12,11,10,9	9	10	10	11	12	.	PBX3	PBX3	0	PBX3_intron		cg18896820	chr9:125889156	3347	.	PBX3	PBX3	.		224	0.090655	0.33768	1.2555e-21	2.45283e-15		1	0.664598	8.51768e-55	0.44169
chr9:125853986-125854002	2	AC	9	4	10,9,8,7	7	9	10	10	10	.	PBX3	PBX3	0	PBX3_intron		cg17086741	chr9:125889543	35549	.	PBX3	PBX3	.		245	-0.02718	0.16629	3.1117e-11	6.07923e-05		1	-0.420595	1.04438e-15	0.1769
chr9:125853986-125854002	2	AC	9	4	10,9,8,7	7	9	10	10	10	.	PBX3	PBX3	0	PBX3_intron		cg15044533	chr9:125886543	32549	.	PBX3	PBX3	.		245	-0.049907	0.18161	3.1327e-12	6.12026e-06		1	-0.656407	3.3911e-54	0.43087
chr9:125853986-125854002	2	AC	9	4	10,9,8,7	7	9	10	10	10	.	PBX3	PBX3	0	PBX3_intron		cg18896820	chr9:125889156	35162	.	PBX3	PBX3	.		224	-0.06876	0.26562	1.3431e-16	2.62397e-10		1	-0.694435	9.51402e-63	0.48224
chr9:125853986-125854002	2	AC	9	4	10,9,8,7	7	9	10	10	10	.	PBX3	PBX3	0	PBX3_intron		cg00238698	chr9:125842686	-11308	.	PBX3	PBX3	.		245	-0.031817	0.2953	3.1791e-20	6.21091e-14		1	-0.738058	3.03014e-77	0.54473
chr9:125853986-125854002	2	AC	9	4	10,9,8,7	7	9	10	10	10	.	PBX3	PBX3	0	PBX3_intron		cg11654592	chr9:125840364	-13630	.	PBX3	PBX3	.		234	-0.057682	0.45571	1.7532e-32	3.42517e-26		1	-0.74405	9.21336e-79	0.55361
chr9:125801785-125801825	2	AC	23	13	32,31,30,29,28,27,26,25,24,23,22,21,20	20	23	26	27	32	.	PBX3	PBX3	0	PBX3_intron		cg00238698	chr9:125842686	40881	.	PBX3	PBX3	.		245	-0.006929	0.25176	5.0018e-17	9.77187e-11		1	-0.619169	8.52531e-45	0.38337
chr9:125801785-125801825	2	AC	23	13	32,31,30,29,28,27,26,25,24,23,22,21,20	20	23	26	27	32	.	PBX3	PBX3	0	PBX3_intron		cg11654592	chr9:125840364	38559	.	PBX3	PBX3	.		234	-0.010355	0.29365	2.9275e-19	5.71937e-13		1	-0.634074	1.34973e-47	0.40205
chr9:125793367-125793392	2	AT	15	14	25,23,22,21,20,19,18,17,16,15,14,12,10,9	9	15	17	18	25	.	PBX3	PBX3	0	PBX3_intron		cg15734589	chr9:125823175	29795.5	.	PBX3	PBX3	.		221	-0.019985	0.18642	1.8913e-11	3.69498e-05		0	0	0	0
chr9:125793367-125793392	2	AT	15	14	25,23,22,21,20,19,18,17,16,15,14,12,10,9	9	15	17	18	25	.	PBX3	PBX3	0	PBX3_intron		cg00238698	chr9:125842686	49306.5	.	PBX3	PBX3	.		223	-0.007188	0.26837	1.0323e-16	2.01677e-10		1	-0.511654	7.83805e-25	0.26179
chr9:125793367-125793392	2	AT	15	14	25,23,22,21,20,19,18,17,16,15,14,12,10,9	9	15	17	18	25	.	PBX3	PBX3	0	PBX3_intron		cg11654592	chr9:125840364	46984.5	.	PBX3	PBX3	.		216	-0.011013	0.32957	2.4712e-20	4.82791e-14		1	-0.502494	1.48119e-23	0.2525
chr9:125791282-125791381	4	CTGT/ATCT	26	12	32,31,30,29,28,27,26,25,24,23,21,20	20	25	26	28	32	.	PBX3	PBX3	0	PBX3_intron		cg11654592	chr9:125840364	49032.5	.	PBX3	PBX3	.		234	0.015488	0.38927	1.1993e-26	2.34304e-20		1	0.625724	1.7657e-46	0.39153
chr9:125629055-125629092	2	AC	19	13	27,24,23,22,21,20,19,18,17,16,14,13,12	12	16	18	19	27	.	MAPKAP1	MAPKAP1	0	MAPKAP1_intron		cg16144450	chr9:125652970	23896.5	.	MAPKAP1	MAPKAP1	.		244	0.012039	0.19495	4.5931e-13	8.9734e-07		1	0.402952	8.54665e-14	0.16237
chr9:125628867-125628908	3	AAC	14	3	15,14,13	13	13	13	15	15	.	MAPKAP1	MAPKAP1	0	MAPKAP1_intron		cg16144450	chr9:125652970	24082.5	.	MAPKAP1	MAPKAP1	.		244	0.031302	0.26378	7.9828e-18	1.55958e-11		1	0.525243	8.08919e-29	0.27588
chr9:125417591-125417623	5	AAAAG	7	4	8,7,6,5	5	5	7	7	8	.	.	MAPKAP1	19771	.		cg13590414	chr9:125410966	-6641	.	.	MAPKAP1	CpG:_110_Shelf_S		244	0.039249	0.1985	2.6668e-13	5.21005e-07		1	0.477535	3.41067e-22	0.22804
chr9:125417591-125417623	5	AAAAG	7	4	8,7,6,5	5	5	7	7	8	.	.	MAPKAP1	19771	.		cg14078157	chr9:125410496	-7111	.	.	MAPKAP1	CpG:_110_Shore_S		233	0.042656	0.26664	2.7919e-17	5.45445e-11		1	0.560678	2.66136e-34	0.31436
chr9:125400424-125400468	4	ATTT	13	6	14,13,12,11,10,9	9	9	13	13	14	.	.	GAPVD1	33218	.		cg13590414	chr9:125410966	10520	.	.	MAPKAP1	CpG:_110_Shelf_S		245	0.020801	0.21615	1.5278e-14	2.98482e-08		1	0.504113	6.02349e-26	0.25413
chr9:125400424-125400468	4	ATTT	13	6	14,13,12,11,10,9	9	9	13	13	14	.	.	GAPVD1	33218	.		cg14078157	chr9:125410496	10050	.	.	MAPKAP1	CpG:_110_Shore_S		234	0.0211	0.25495	1.5258e-16	2.98091e-10		1	0.578887	9.84464e-38	0.33511
chr9:125382026-125382071	5	ATTTT	9	7	13,12,11,10,9,8,7	7	9	9	11	13	.	.	GAPVD1	14820	.		cg14078157	chr9:125410496	28447.5	.	.	MAPKAP1	CpG:_110_Shore_S		234	-0.02606	0.1713	4.2388e-11	8.28122e-05		1	-0.380487	3.86108e-11	0.14477
chr9:125250904-125250947	2	AC/GT	22	9	28,27,26,25,24,23,22,21,20	20	22	23	26	28	.	.	HSPA5	9562	.		cg10400423	chr9:125242494	-8431.5	HSPA5	.	HSPA5	CpG:_88_Shore_S		230	-0.030123	0.23413	6.6934e-15	1.30767e-08		1	-0.530179	2.94265e-27	0.28109
chr9:125232218-125232270	2	AC/AG	27	7	31,30,29,28,27,26,25	25	27	29	29	31	.	RABEPK	RABEPK	0	RABEPK_intron		cg10997785	chr9:125242418	10174	HSPA5	.	HSPA5	CpG:_88_Shore_S		244	-0.034191	0.22021	9.1553e-15	1.78864e-08		1	-0.512016	1.12219e-26	0.26216
chr9:125232218-125232270	2	AC/AG	27	7	31,30,29,28,27,26,25	25	27	29	29	31	.	RABEPK	RABEPK	0	RABEPK_intron		cg10400423	chr9:125242494	10250	HSPA5	.	HSPA5	CpG:_88_Shore_S		245	-0.049248	0.30316	8.0334e-21	1.56946e-14		1	-0.579465	1.76527e-37	0.33578
chr9:124472436-124472521	5	GTTTT	17	4	16,15,14,13	13	14	14	16	16	.	.	NR5A1	8715	.		cg01786973	chr9:124487470	14991.5	.	NR5A1	NR5A1	CpG:_34_Island		245	-0.042118	0.18317	2.4743e-12	4.83397e-06		1	-0.474236	6.17499e-21	0.2249
chr9:124472436-124472521	5	GTTTT	17	4	16,15,14,13	13	14	14	16	16	.	.	NR5A1	8715	.		cg09039879	chr9:124468455	-4023.5	.	.	NR5A1	.		244	-0.032098	0.19163	7.6162e-13	1.48795e-06		1	-0.504093	8.6273e-25	0.25411
chr9:124472436-124472521	5	GTTTT	17	4	16,15,14,13	13	14	14	16	16	.	.	NR5A1	8715	.		cg14219918	chr9:124487283	14804.5	.	NR5A1	NR5A1	CpG:_34_Island		245	-0.051408	0.20136	1.5339e-13	2.99673e-07		1	-0.479802	1.26043e-21	0.23021
chr9:124472436-124472521	5	GTTTT	17	4	16,15,14,13	13	14	14	16	16	.	.	NR5A1	8715	.		cg08256357	chr9:124468648	-3830.5	.	.	NR5A1	.		245	-0.038172	0.21144	3.2004e-14	6.25253e-08		1	-0.531451	1.13121e-28	0.28244
chr9:124247692-124247721	4	AAAT	8	4	10,9,8,6	6	8	8	8	10	.	.	NEK6	9885	.		cg16453157	chr9:124223367	-24339.5	.	.	NEK6	.		245	-0.044839	0.18997	8.8074e-13	1.72068e-06		1	-0.557611	3.39952e-34	0.31093
chr9:124247692-124247721	4	AAAT	8	4	10,9,8,6	6	8	8	8	10	.	.	NEK6	9885	.		cg16416819	chr9:124260259	12552.5	.	NEK6	NEK6	CpG:_53_Shore_S		245	0.059355	0.33249	4.1309e-23	8.07042e-17		1	0.711203	9.87283e-69	0.50581
chr9:124209079-124209113	4	GTTT	10	4	11,10,9,8	8	10	11	11	11	.	.	NEK6	48493	.		cg16453157	chr9:124223367	14271	.	.	NEK6	.		245	-0.029819	0.15278	2.2852e-10	0.000446453		1	-0.528545	2.17924e-29	0.27936
chr9:124042849-124042889	2	AT/AC	21	13	33,31,30,29,28,27,26,25,24,23,22,21,20	20	21	22	27	33	.	.	LHX2	9549	.		cg25162573	chr9:124047305	4436	.	.	LHX2	CpG:_53_Shore_S		244	0.003705	0.17888	5.2322e-12	1.0222e-05		1	0.342082	5.30706e-08	0.11702
chr9:123941881-123941932	2	AC	26	3	28,27,26	26	26	26	26	28	.	.	DENND1A	11744	.		cg26672917	chr9:123941421	-485.5	.	.	DENND1A	.		245	0.036852	0.25251	4.4206e-17	8.63639e-11		1	0.508272	9.83172e-27	0.25834
chr9:123607459-123607580	2	AG/AC/AG/GT	61	7	62,61,60,57,56,55,54	54	57	61	61	62	.	DENND1A	DENND1A	0	DENND1A_intron		cg10515967	chr9:123637730	30210.5	.	DENND1A	DENND1A	.		240	0.017645	0.18661	2.4881e-12	4.86093e-06		1	0.535789	2.72478e-22	0.28707
chr9:123395458-123395526	2	CT/GT/AG	35	12	47,45,44,43,42,41,40,39,37,36,35,34	34	36	36	43	47	.	DENND1A	DENND1A	0	DENND1A_intron		cg13404038	chr9:123361065	-34427	.	CRB2	CRB2	.		236	0.015172	0.20701	1.8469e-13	3.60823e-07		1	0.35526	1.33778e-08	0.12621
chr9:122195969-122195990	4	ATTT	6	8	13,12,11,10,9,8,7,6	6	6	6	10	13	.	MORN5	MORN5	0	MORN5_intron		cg06453184	chr9:122191152	-4827.5	.	MORN5	MORN5	.		241	0.008428	0.22937	3.194e-15	6.24002e-09		1	0.593153	2.27261e-40	0.35183
chr9:122066189-122066243	3	GTT/GGT	18	5	20,19,18,17,16	16	17	18	18	20	.	TTLL11	TTLL11	0	TTLL11_intron		cg09972281	chr9:122021280	-44936	.	TTLL11	TTLL11	.		243	0.117065	0.34268	9.5916e-24	1.87388e-17		1	0.548534	5.51122e-32	0.30089
chr9:121553027-121553081	5	CCTCT	11	8	13,12,11,10,9,8,7,6	6	7	8	9	13	.	.	DAB2IP	14021	.		cg24505117	chr9:121506105	-46949	.	.	GGTA1P	.		245	0.025522	0.17754	5.7873e-12	1.13065e-05		1	0.5155	4.27469e-26	0.26574
chr9:121544096-121544159	2	GT/AT	32	13	36,35,34,33,32,31,30,29,28,27,24,23,22	22	29	29	31	36	.	.	DAB2IP	22943	.		cg05469443	chr9:121559409	15281.5	.	.	DAB2IP	.		245	-0.018401	0.1713	1.4745e-11	2.88069e-05		1	-0.469947	7.53425e-21	0.22085
chr9:121544096-121544159	2	GT/AT	32	13	36,35,34,33,32,31,30,29,28,27,24,23,22	22	29	29	31	36	.	.	DAB2IP	22943	.		cg13780516	chr9:121500272	-43855.5	GGTA1P	.	GGTA1P	CpG:_80_Island		245	0.015926	0.34949	1.7546e-24	3.42791e-18		1	0.4531	7.01239e-19	0.2053
chr9:121544096-121544159	2	GT/AT	32	13	36,35,34,33,32,31,30,29,28,27,24,23,22	22	29	29	31	36	.	.	DAB2IP	22943	.		cg24505117	chr9:121506105	-38022.5	.	.	GGTA1P	.		245	0.02314	0.38552	1.6452e-27	3.21418e-21		1	0.698291	1.14566e-63	0.48761
chr9:121544096-121544159	2	GT/AT	32	13	36,35,34,33,32,31,30,29,28,27,24,23,22	22	29	29	31	36	.	.	DAB2IP	22943	.		cg13607226	chr9:121500420	-43707.5	GGTA1P	.	GGTA1P	CpG:_80_Shore_S		245	0.041397	0.50537	5.1263e-39	1.00151e-32		1	0.780807	2.3004e-91	0.60966
chr9:121544096-121544159	2	GT/AT	32	13	36,35,34,33,32,31,30,29,28,27,24,23,22	22	29	29	31	36	.	.	DAB2IP	22943	.		cg08151264	chr9:121500347	-43780.5	GGTA1P	.	GGTA1P	CpG:_80_Shore_S		245	0.028482	0.54258	3.6996e-43	7.2278e-37		1	0.715304	1.46097e-68	0.51166
chr9:121480031-121480073	5	CTTTT	9	4	13,12,11,9	9	9	9	12	13	.	GGTA1P	GGTA1P	0	GGTA1P_intron		cg13780516	chr9:121500272	20221	GGTA1P	.	GGTA1P	CpG:_80_Island		245	0.024564	0.39438	2.789e-28	5.44879e-22		1	0.40603	2.95987e-11	0.16486
chr9:121480031-121480073	5	CTTTT	9	4	13,12,11,9	9	9	9	12	13	.	GGTA1P	GGTA1P	0	GGTA1P_intron		cg24505117	chr9:121506105	26054	.	.	GGTA1P	.		245	0.035248	0.42432	5.6777e-31	1.10924e-24		1	0.6584	1.65247e-45	0.43349
chr9:121480031-121480073	5	CTTTT	9	4	13,12,11,9	9	9	9	12	13	.	GGTA1P	GGTA1P	0	GGTA1P_intron		cg26938497	chr9:121485680	5628	.	GGTA1P	GGTA1P	.		245	0.036459	0.48234	1.3239e-36	2.58646e-30		1	0.688135	5.87766e-52	0.47353
chr9:121480031-121480073	5	CTTTT	9	4	13,12,11,9	9	9	9	12	13	.	GGTA1P	GGTA1P	0	GGTA1P_intron		cg14116294	chr9:121456108	-23944	.	GGTA1P	GGTA1P	.		245	-0.064361	0.50345	8.2296e-39	1.60779e-32		1	-0.711829	1.11047e-57	0.5067
chr9:121480031-121480073	5	CTTTT	9	4	13,12,11,9	9	9	9	12	13	.	GGTA1P	GGTA1P	0	GGTA1P_intron		cg13607226	chr9:121500420	20369	GGTA1P	.	GGTA1P	CpG:_80_Shore_S		245	0.061828	0.53476	2.9218e-42	5.70823e-36		1	0.700086	8.9769e-55	0.49012
chr9:121480031-121480073	5	CTTTT	9	4	13,12,11,9	9	9	9	12	13	.	GGTA1P	GGTA1P	0	GGTA1P_intron		cg24863559	chr9:121465111	-14941	.	GGTA1P	GGTA1P	.		245	-0.074769	0.58881	8.4944e-49	1.65953e-42		1	-0.823523	5.71382e-95	0.67819
chr9:121480031-121480073	5	CTTTT	9	4	13,12,11,9	9	9	9	12	13	.	GGTA1P	GGTA1P	0	GGTA1P_intron		cg08151264	chr9:121500347	20296	GGTA1P	.	GGTA1P	CpG:_80_Shore_S		245	0.043858	0.61031	1.2221e-51	2.38758e-45		1	0.674159	7.84999e-49	0.45449
chr9:121458626-121458694	4	AAAT	17	7	20,19,18,17,16,15,14	14	16	17	18	20	.	GGTA1P	GGTA1P	0	GGTA1P_intron		cg24863559	chr9:121465111	6451	.	GGTA1P	GGTA1P	.		245	-0.046731	0.15071	3.0947e-10	0.000604602		1	-0.506932	2.78585e-26	0.25698
chr9:121458626-121458694	4	AAAT	17	7	20,19,18,17,16,15,14	14	16	17	18	20	.	GGTA1P	GGTA1P	0	GGTA1P_intron		cg13780516	chr9:121500272	41613	GGTA1P	.	GGTA1P	CpG:_80_Island		245	0.022051	0.20825	5.2658e-14	1.02876e-07		1	0.487975	9.84268e-24	0.23812
chr9:121458626-121458694	4	AAAT	17	7	20,19,18,17,16,15,14	14	16	17	18	20	.	GGTA1P	GGTA1P	0	GGTA1P_intron		cg24505117	chr9:121506105	47446	.	.	GGTA1P	.		245	0.031935	0.22822	2.2588e-15	4.41295e-09		1	0.634705	4.42953e-49	0.40285
chr9:121458626-121458694	4	AAAT	17	7	20,19,18,17,16,15,14	14	16	17	18	20	.	GGTA1P	GGTA1P	0	GGTA1P_intron		cg14116294	chr9:121456108	-2552	.	GGTA1P	GGTA1P	.		245	-0.058398	0.27158	1.8465e-18	3.60745e-12		1	-0.686236	1.63996e-61	0.47092
chr9:121458626-121458694	4	AAAT	17	7	20,19,18,17,16,15,14	14	16	17	18	20	.	GGTA1P	GGTA1P	0	GGTA1P_intron		cg26938497	chr9:121485680	27020	.	GGTA1P	GGTA1P	.		245	0.034329	0.2802	4.2861e-19	8.37362e-13		1	0.645066	2.05944e-51	0.41611
chr9:121458626-121458694	4	AAAT	17	7	20,19,18,17,16,15,14	14	16	17	18	20	.	GGTA1P	GGTA1P	0	GGTA1P_intron		cg08151264	chr9:121500347	41688	GGTA1P	.	GGTA1P	CpG:_80_Shore_S		245	0.040133	0.33485	2.6763e-23	5.22861e-17		1	0.663355	9.26934e-56	0.44004
chr9:121458626-121458694	4	AAAT	17	7	20,19,18,17,16,15,14	14	16	17	18	20	.	GGTA1P	GGTA1P	0	GGTA1P_intron		cg13607226	chr9:121500420	41761	GGTA1P	.	GGTA1P	CpG:_80_Shore_S		245	0.0639	0.37426	1.5161e-26	2.96196e-20		1	0.720958	1.04648e-71	0.51978
chr9:121442713-121442738	2	GT	13	7	16,15,14,13,12,11,10	10	13	13	14	16	.	.	GGTA1P	12303	.		cg24863559	chr9:121465111	22385.5	.	GGTA1P	GGTA1P	.		243	-0.097111	0.19363	6.2689e-13	1.22474e-06		1	-0.538386	2.76491e-31	0.28986
chr9:121442713-121442738	2	GT	13	7	16,15,14,13,12,11,10	10	13	13	14	16	.	.	GGTA1P	12303	.		cg14116294	chr9:121456108	13382.5	.	GGTA1P	GGTA1P	.		243	-0.114264	0.31437	1.6099e-21	3.14521e-15		1	-0.698878	1.39762e-65	0.48843
chr9:121442713-121442738	2	GT	13	7	16,15,14,13,12,11,10	10	13	13	14	16	.	.	GGTA1P	12303	.		cg26938497	chr9:121485680	42954.5	.	GGTA1P	GGTA1P	.		243	0.068637	0.33568	3.4744e-23	6.78783e-17		1	0.650953	2.92992e-53	0.42374
chr9:121411157-121411180	2	AC	12	13	24,23,22,21,20,19,18,17,16,15,14,12,11	11	17	17	19	24	.	.	STOM	40854	.		cg14116294	chr9:121456108	44939.5	.	GGTA1P	GGTA1P	.		245	-0.032711	0.35971	2.5234e-25	4.92989e-19		1	-0.640328	9.25251e-50	0.41002
chr9:121334765-121334819	2	GT	29	17	33,31,30,29,28,27,26,25,24,23,22,21,20,19,18,16,13	13	21	21	26	33	.	.	GSN	1924	.		cg06927938	chr9:121288946	-45846	.	GSN	GSN	.		241	0.005418	0.15695	1.7557e-10	0.000343006		1	0.371026	1.26207e-10	0.13766
chr9:121334765-121334819	2	GT	29	17	33,31,30,29,28,27,26,25,24,23,22,21,20,19,18,16,13	13	21	21	26	33	.	.	GSN	1924	.		cg14365564	chr9:121370801	36009	STOM	.	STOM	CpG:_85_Island		244	0.007183	0.19028	9.3571e-13	1.82807e-06		1	0.325822	6.81293e-07	0.10616
chr9:121334765-121334819	2	GT	29	17	33,31,30,29,28,27,26,25,24,23,22,21,20,19,18,16,13	13	21	21	26	33	.	.	GSN	1924	.		cg18676053	chr9:121370816	36024	STOM	.	STOM	CpG:_85_Island		244	0.009766	0.25269	4.9769e-17	9.72322e-11		1	0.362781	6.72034e-10	0.13161
chr9:121283672-121283721	4	ATTC	13	6	15,14,13,12,11,9	9	9	12	12	15	GSN-AS1	GSN,GSN-AS1	GSN,GSN-AS1	0	GSN-AS1_3utr,GSN_intron		cg02025602	chr9:121283998	301.5	GSN-AS1	GSN,GSN-AS1	GSN-AS1	.		245	0.014464	0.18809	1.1737e-12	2.29302e-06		1	0.420559	1.56019e-15	0.17687
chr9:120945081-120945108	2	AC	17	12	31,30,29,28,27,26,25,24,23,22,18,17	17	17	24	24	31	.	C5-OT1	C5-OT1	0	C5-OT1_intron		cg00725213	chr9:120928393	-16701.5	TRAF1	TRAF1	TRAF1	CpG:_86_Shore_N		206	-0.007492	0.19859	1.9176e-11	3.74636e-05		1	-0.364829	5.46346e-07	0.1331
chr9:120887622-120887676	2	AC	29	12	30,29,28,27,26,25,24,23,22,21,20,19	19	23	24	29	30	.	PHF19	PHF19	0	PHF19_intron		cg00725213	chr9:120928393	40744	TRAF1	TRAF1	TRAF1	CpG:_86_Shore_N		244	0.007838	0.1518	2.87e-10	0.000560703		1	0.390602	2.97847e-12	0.15257
chr9:120887622-120887676	2	AC	29	12	30,29,28,27,26,25,24,23,22,21,20,19	19	23	24	29	30	.	PHF19	PHF19	0	PHF19_intron		cg09419670	chr9:120843388	-44261	PSMD5,PSMD5-AS1	PSMD5-AS1	PSMD5-AS1	CpG:_51_Shore_S		244	-0.029131	0.17659	7.3713e-12	1.44011e-05		1	-0.369662	2.09037e-10	0.13665
chr9:120858812-120858858	2	AC	24	13	32,31,30,29,28,27,26,25,24,23,22,21,20	20	25	25	27	32	.	PHF19	PHF19	0	PHF19_intron		cg14255062	chr9:120844397	-14438	PSMD5,PSMD5-AS1	PSMD5-AS1	PSMD5-AS1	CpG:_51_Shore_S		241	-0.009826	0.15271	3.2391e-10	0.000632813		1	-0.51183	2.19764e-26	0.26197
chr9:120858812-120858858	2	AC	24	13	32,31,30,29,28,27,26,25,24,23,22,21,20	20	25	25	27	32	.	PHF19	PHF19	0	PHF19_intron		cg03515999	chr9:120844054	-14781	PSMD5,PSMD5-AS1	PSMD5-AS1	PSMD5-AS1	CpG:_51_Shore_S		242	-0.01098	0.16945	2.5845e-11	5.04926e-05		1	-0.535266	7.84099e-30	0.28651
chr9:120858812-120858858	2	AC	24	13	32,31,30,29,28,27,26,25,24,23,22,21,20	20	25	25	27	32	.	PHF19	PHF19	0	PHF19_intron		cg21717724	chr9:120842236	-16599	PSMD5,PSMD5-AS1	PSMD5	PSMD5	CpG:_51_Shore_N		239	-0.036995	0.18061	6.7088e-12	1.31068e-05		1	-0.491782	1.22042e-23	0.24185
chr9:120858812-120858858	2	AC	24	13	32,31,30,29,28,27,26,25,24,23,22,21,20	20	25	25	27	32	.	PHF19	PHF19	0	PHF19_intron		cg03499324	chr9:120843841	-14994	PSMD5,PSMD5-AS1	PSMD5-AS1	PSMD5-AS1	CpG:_51_Shore_S		242	-0.024095	0.18855	1.5064e-12	2.94301e-06		1	-0.467942	1.70514e-20	0.21897
chr9:120858812-120858858	2	AC	24	13	32,31,30,29,28,27,26,25,24,23,22,21,20	20	25	25	27	32	.	PHF19	PHF19	0	PHF19_intron		cg09419670	chr9:120843388	-15447	PSMD5,PSMD5-AS1	PSMD5-AS1	PSMD5-AS1	CpG:_51_Shore_S		241	-0.041759	0.19549	5.8965e-13	1.15198e-06		1	-0.517513	3.39169e-27	0.26782
chr9:120853807-120853826	2	AT	10	8	19,18,17,16,13,12,11,10	10	10	10	10	19	.	CUTALP	CUTALP	0	CUTALP_5utr		cg14255062	chr9:120844397	-9419.5	PSMD5,PSMD5-AS1	PSMD5-AS1	PSMD5-AS1	CpG:_51_Shore_S		244	-0.010575	0.2039	1.1616e-13	2.26938e-07		1	-0.466701	6.99615e-21	0.21781
chr9:120853807-120853826	2	AT	10	8	19,18,17,16,13,12,11,10	10	10	10	10	19	.	CUTALP	CUTALP	0	CUTALP_5utr		cg21717724	chr9:120842236	-11580.5	PSMD5,PSMD5-AS1	PSMD5	PSMD5	CpG:_51_Shore_N		242	-0.037329	0.20809	7.709e-14	1.50608e-07		1	-0.39512	6.05598e-13	0.15612
chr9:120853807-120853826	2	AT	10	8	19,18,17,16,13,12,11,10	10	10	10	10	19	.	CUTALP	CUTALP	0	CUTALP_5utr		cg03515999	chr9:120844054	-9762.5	PSMD5,PSMD5-AS1	PSMD5-AS1	PSMD5-AS1	CpG:_51_Shore_S		245	-0.011908	0.23036	1.6066e-15	3.13877e-09		1	-0.405882	4.73078e-14	0.16474
chr9:120853807-120853826	2	AT	10	8	19,18,17,16,13,12,11,10	10	10	10	10	19	.	CUTALP	CUTALP	0	CUTALP_5utr		cg09419670	chr9:120843388	-10428.5	PSMD5,PSMD5-AS1	PSMD5-AS1	PSMD5-AS1	CpG:_51_Shore_S		244	-0.044832	0.25828	1.9853e-17	3.87862e-11		1	-0.429185	1.65834e-16	0.1842
chr9:120841578-120841615	5	AAAAC	8	3	9,8,7	7	8	8	8	9	CUTALP,PSMD5	PSMD5	PSMD5	0	PSMD5_intron		cg09586646	chr9:120843292	1695.5	PSMD5,PSMD5-AS1	PSMD5-AS1	PSMD5-AS1	CpG:_51_Island		245	-0.106689	0.16056	7.2788e-11	0.000142204		1	-0.346165	1.0738e-08	0.11983
chr9:120841578-120841615	5	AAAAC	8	3	9,8,7	7	8	8	8	9	CUTALP,PSMD5	PSMD5	PSMD5	0	PSMD5_intron		cg10011799	chr9:120792371	-49225.5	FBXW2,LOC100288842	FBXW2	FBXW2	CpG:_61_Shore_N		245	0.075464	0.18779	1.2276e-12	2.39833e-06		1	0.455082	1.27403e-19	0.2071
chr9:120841578-120841615	5	AAAAC	8	3	9,8,7	7	8	8	8	9	CUTALP,PSMD5	PSMD5	PSMD5	0	PSMD5_intron		cg03499324	chr9:120843841	2244.5	PSMD5,PSMD5-AS1	PSMD5-AS1	PSMD5-AS1	CpG:_51_Shore_S		245	-0.142483	0.27739	6.9062e-19	1.34924e-12		1	-0.397643	2.64296e-13	0.15812
chr9:120841578-120841615	5	AAAAC	8	3	9,8,7	7	8	8	8	9	CUTALP,PSMD5	PSMD5	PSMD5	0	PSMD5_intron		cg14255062	chr9:120844397	2800.5	PSMD5,PSMD5-AS1	PSMD5-AS1	PSMD5-AS1	CpG:_51_Shore_S		244	-0.0708	0.33293	4.6735e-23	9.13048e-17		1	-0.597629	1.305e-41	0.35716
chr9:120841578-120841615	5	AAAAC	8	3	9,8,7	7	8	8	8	9	CUTALP,PSMD5	PSMD5	PSMD5	0	PSMD5_intron		cg09419670	chr9:120843388	1791.5	PSMD5,PSMD5-AS1	PSMD5-AS1	PSMD5-AS1	CpG:_51_Shore_S		244	-0.270835	0.34337	6.824e-24	1.33318e-17		1	-0.54572	2.18902e-32	0.29781
chr9:120841578-120841615	5	AAAAC	8	3	9,8,7	7	8	8	8	9	CUTALP,PSMD5	PSMD5	PSMD5	0	PSMD5_intron		cg21717724	chr9:120842236	639.5	PSMD5,PSMD5-AS1	PSMD5	PSMD5	CpG:_51_Shore_N		242	-0.260292	0.36947	7.7568e-26	1.51542e-19		1	-0.51613	9.64087e-28	0.26639
chr9:120841578-120841615	5	AAAAC	8	3	9,8,7	7	8	8	8	9	CUTALP,PSMD5	PSMD5	PSMD5	0	PSMD5_intron		cg03515999	chr9:120844054	2457.5	PSMD5,PSMD5-AS1	PSMD5-AS1	PSMD5-AS1	CpG:_51_Shore_S		245	-0.082321	0.40119	6.9931e-29	1.36622e-22		1	-0.557315	2.6226e-34	0.3106
chr9:120830887-120830903	2	AT	9	4	12,11,10,9	9	10	10	10	12	.	PSMD5	PSMD5	0	PSMD5_intron		cg09586646	chr9:120843292	12397	PSMD5,PSMD5-AS1	PSMD5-AS1	PSMD5-AS1	CpG:_51_Island		245	0.114127	0.20273	1.2396e-13	2.42177e-07		1	0.387324	2.448e-12	0.15002
chr9:120830887-120830903	2	AT	9	4	12,11,10,9	9	10	10	10	12	.	PSMD5	PSMD5	0	PSMD5_intron		cg14255062	chr9:120844397	13502	PSMD5,PSMD5-AS1	PSMD5-AS1	PSMD5-AS1	CpG:_51_Shore_S		244	0.053903	0.2082	5.9713e-14	1.16659e-07		1	0.518816	3.87146e-28	0.26917
chr9:120830887-120830903	2	AT	9	4	12,11,10,9	9	10	10	10	12	.	PSMD5	PSMD5	0	PSMD5_intron		cg03515999	chr9:120844054	13159	PSMD5,PSMD5-AS1	PSMD5-AS1	PSMD5-AS1	CpG:_51_Shore_S		245	0.062417	0.25451	3.1798e-17	6.21228e-11		1	0.64605	9.31671e-52	0.41738
chr9:120830887-120830903	2	AT	9	4	12,11,10,9	9	10	10	10	12	.	PSMD5	PSMD5	0	PSMD5_intron		cg09419670	chr9:120843388	12493	PSMD5,PSMD5-AS1	PSMD5-AS1	PSMD5-AS1	CpG:_51_Shore_S		244	0.248777	0.31964	5.1864e-22	1.01325e-15		1	0.591185	2.7927e-40	0.3495
chr9:120830887-120830903	2	AT	9	4	12,11,10,9	9	10	10	10	12	.	PSMD5	PSMD5	0	PSMD5_intron		cg21717724	chr9:120842236	11341	PSMD5,PSMD5-AS1	PSMD5	PSMD5	CpG:_51_Shore_N		242	0.233609	0.32881	1.4812e-22	2.89378e-16		1	0.565933	1.28793e-35	0.32028
chr9:120830887-120830903	2	AT	9	4	12,11,10,9	9	10	10	10	12	.	PSMD5	PSMD5	0	PSMD5_intron		cg03499324	chr9:120843841	12946	PSMD5,PSMD5-AS1	PSMD5-AS1	PSMD5-AS1	CpG:_51_Shore_S		245	0.16953	0.43334	8.2602e-32	1.61377e-25		1	0.681799	2.49987e-60	0.46485
chr9:120813371-120813405	2	GT	18	11	24,23,22,21,20,19,18,17,16,13,12	12	17	17	18	24	.	.	PSMD5	2649	.		cg09586646	chr9:120843292	29904	PSMD5,PSMD5-AS1	PSMD5-AS1	PSMD5-AS1	CpG:_51_Island		244	-0.026393	0.19438	5.0108e-13	9.78945e-07		1	-0.349414	1.11407e-08	0.12209
chr9:120813371-120813405	2	GT	18	11	24,23,22,21,20,19,18,17,16,13,12	12	17	17	18	24	.	.	PSMD5	2649	.		cg10011799	chr9:120792371	-21017	FBXW2,LOC100288842	FBXW2	FBXW2	CpG:_61_Shore_N		244	0.018178	0.21617	1.7243e-14	3.36871e-08		1	0.548288	6.02016e-32	0.30062
chr9:120813371-120813405	2	GT	18	11	24,23,22,21,20,19,18,17,16,13,12	12	17	17	18	24	.	.	PSMD5	2649	.		cg14255062	chr9:120844397	31009	PSMD5,PSMD5-AS1	PSMD5-AS1	PSMD5-AS1	CpG:_51_Shore_S		243	-0.014831	0.28942	1.2442e-19	2.43076e-13		1	-0.593793	6.3588e-40	0.35259
chr9:120813371-120813405	2	GT	18	11	24,23,22,21,20,19,18,17,16,13,12	12	17	17	18	24	.	.	PSMD5	2649	.		cg03499324	chr9:120843841	30453	PSMD5,PSMD5-AS1	PSMD5-AS1	PSMD5-AS1	CpG:_51_Shore_S		244	-0.032749	0.28974	9.9121e-20	1.9365e-13		1	-0.447783	3.24096e-18	0.20051
chr9:120813371-120813405	2	GT	18	11	24,23,22,21,20,19,18,17,16,13,12	12	17	17	18	24	.	.	PSMD5	2649	.		cg21717724	chr9:120842236	28848	PSMD5,PSMD5-AS1	PSMD5	PSMD5	CpG:_51_Shore_N		241	-0.056156	0.34165	1.7694e-23	3.45682e-17		1	-0.537289	3.23274e-30	0.28868
chr9:120813371-120813405	2	GT	18	11	24,23,22,21,20,19,18,17,16,13,12	12	17	17	18	24	.	.	PSMD5	2649	.		cg03515999	chr9:120844054	30666	PSMD5,PSMD5-AS1	PSMD5-AS1	PSMD5-AS1	CpG:_51_Shore_S		244	-0.01726	0.35073	1.727e-24	3.37399e-18		1	-0.550318	2.37557e-32	0.30285
chr9:120813371-120813405	2	GT	18	11	24,23,22,21,20,19,18,17,16,13,12	12	17	17	18	24	.	.	PSMD5	2649	.		cg09419670	chr9:120843388	30000	PSMD5,PSMD5-AS1	PSMD5-AS1	PSMD5-AS1	CpG:_51_Shore_S		243	-0.06529	0.3942	4.7933e-28	9.36453e-22		1	-0.566321	5.23502e-35	0.32072
chr9:120808355-120808398	3	ATT	15	4	20,16,15,14	14	15	15	15	20	.	.	B3GNT10	6628	.		cg14255062	chr9:120844397	36020.5	PSMD5,PSMD5-AS1	PSMD5-AS1	PSMD5-AS1	CpG:_51_Shore_S		244	0.04433	0.14788	5.0777e-10	0.000992015		1	0.470956	1.23981e-21	0.2218
chr9:120808355-120808398	3	ATT	15	4	20,16,15,14	14	15	15	15	20	.	.	B3GNT10	6628	.		cg21717724	chr9:120842236	33859.5	PSMD5,PSMD5-AS1	PSMD5	PSMD5	CpG:_51_Shore_N		242	0.162918	0.16307	6.5915e-11	0.000128776		1	0.414813	4.28566e-15	0.17207
chr9:120808355-120808398	3	ATT	15	4	20,16,15,14	14	15	15	15	20	.	.	B3GNT10	6628	.		cg10011799	chr9:120792371	-16005.5	FBXW2,LOC100288842	FBXW2	FBXW2	CpG:_61_Shore_N		245	-0.068095	0.17301	1.1421e-11	2.23129e-05		1	-0.547586	1.0879e-32	0.29985
chr9:120808355-120808398	3	ATT	15	4	20,16,15,14	14	15	15	15	20	.	.	B3GNT10	6628	.		cg09419670	chr9:120843388	35011.5	PSMD5,PSMD5-AS1	PSMD5-AS1	PSMD5-AS1	CpG:_51_Shore_S		244	0.189498	0.19046	9.1095e-13	1.7797e-06		1	0.441984	3.95817e-18	0.19535
chr9:120714260-120714290	3	CGG	10	3	11,10,8	8	8	8	10	11	MEGF9	MEGF9	MEGF9	0	MEGF9_cds		cg12846730	chr9:120756039	41764	.	.	FBXW2	.		241	0.041233	0.19716	4.5843e-13	8.95621e-07		1	0.50021	1.82967e-25	0.25021
chr9:119318845-119318885	2	GT	22	10	27,26,25,24,23,22,21,20,19,17	17	20	22	23	27	.	BRINP1	BRINP1	0	BRINP1_intron		cg13682325	chr9:119348902	30037	.	BRINP1	BRINP1	.		245	0.012151	0.15495	1.6613e-10	0.000324563		1	0.310651	9.9889e-06	0.096504
chr9:119297815-119297844	3	AAT	10	3	13,11,10	10	10	10	11	13	.	BRINP1	BRINP1	0	BRINP1_intron		cg08453065	chr9:119289880	-7949.5	.	BRINP1	BRINP1	.		243	0.074138	0.21587	2.0464e-14	3.99799e-08		1	0.315244	8.37811e-06	0.099379
chr9:117686256-117686284	2	GT	15	14	27,26,25,24,23,22,21,20,19,18,17,16,12,11	11	19	22	22	27	.	.	TLR4	18119	.		cg23520270	chr9:117697011	10741	.	.	TLR4	.		238	0.029427	0.20565	1.7923e-13	3.50156e-07		1	0.528337	6.31945e-28	0.27914
chr9:117003531-117003554	2	GT	12	25	38,37,35,34,33,32,31,30,29,28,27,26,25,24,23,22,21,20,19,18,17,16,15,14,12	12	21	27	31	38	.	ASTN2	ASTN2	0	ASTN2_intron		cg14564229	chr9:116985827	-17715.5	.	ASTN2	ASTN2	.		244	-0.003944	0.2679	4.0142e-18	7.84242e-12		1	-0.606729	1.34501e-38	0.36812
chr9:117003531-117003554	2	GT	12	25	38,37,35,34,33,32,31,30,29,28,27,26,25,24,23,22,21,20,19,18,17,16,15,14,12	12	21	27	31	38	.	ASTN2	ASTN2	0	ASTN2_intron		cg13071082	chr9:116990813	-12729.5	.	ASTN2	ASTN2	.		243	-0.010978	0.31501	1.4365e-21	2.80645e-15		1	-0.648706	8.90408e-47	0.42082
chr9:116978443-116978523	2	CT/AC	41	9	48,47,46,45,44,43,42,41,40	40	41	41	42	48	.	ASTN2	ASTN2	0	ASTN2_intron		cg14564229	chr9:116985827	7344	.	ASTN2	ASTN2	.		245	0.010882	0.16435	4.1482e-11	8.10421e-05		1	0.432816	1.23792e-16	0.18733
chr9:116978443-116978523	2	CT/AC	41	9	48,47,46,45,44,43,42,41,40	40	41	41	42	48	.	ASTN2	ASTN2	0	ASTN2_intron		cg13071082	chr9:116990813	12330	.	ASTN2	ASTN2	.		244	0.031026	0.20142	1.7041e-13	3.32925e-07		1	0.46759	1.14515e-20	0.21864
chr9:116925852-116925890	2	AC	20	5	23,22,21,20,18	18	21	21	22	23	.	ASTN2	ASTN2	0	ASTN2_intron		cg06806493	chr9:116935689	9818	.	ASTN2	ASTN2	.		241	-0.069229	0.17418	1.4171e-11	2.76855e-05		1	-0.354006	4.33557e-09	0.12532
chr9:116586813-116586861	2	AC	25	18	38,36,35,34,33,32,31,30,29,28,27,26,25,24,23,22,21,20	20	26	32	33	38	.	ASTN2	ASTN2	0	ASTN2_intron		cg01606801	chr9:116549427	-37410	.	ASTN2,ASTN2-AS1	ASTN2	.		244	-0.012901	0.33678	2.3064e-23	4.50594e-17		1	-0.533592	1.00647e-29	0.28472
chr9:116586813-116586861	2	AC	25	18	38,36,35,34,33,32,31,30,29,28,27,26,25,24,23,22,21,20	20	26	32	33	38	.	ASTN2	ASTN2	0	ASTN2_intron		cg24998347	chr9:116549324	-37513	.	ASTN2,ASTN2-AS1	ASTN2	.		243	-0.016912	0.3939	5.0904e-28	9.94496e-22		1	-0.597277	1.03084e-39	0.35674
chr9:116578620-116578667	2	GT	24	15	30,29,28,27,26,25,24,23,22,21,20,19,18,14,13	13	21	21.5	24	30	.	ASTN2	ASTN2	0	ASTN2_intron		cg01990027	chr9:116550647	-27996.5	.	ASTN2,ASTN2-AS1	ASTN2	.		244	-0.012187	0.20422	1.1055e-13	2.15978e-07		1	-0.354133	7.28311e-09	0.12541
chr9:116578620-116578667	2	GT	24	15	30,29,28,27,26,25,24,23,22,21,20,19,18,14,13	13	21	21.5	24	30	.	ASTN2	ASTN2	0	ASTN2_intron		cg01606801	chr9:116549427	-29216.5	.	ASTN2,ASTN2-AS1	ASTN2	.		245	-0.015991	0.41699	2.6683e-30	5.21298e-24		1	-0.671327	1.90331e-56	0.45068
chr9:116578620-116578667	2	GT	24	15	30,29,28,27,26,25,24,23,22,21,20,19,18,14,13	13	21	21.5	24	30	.	ASTN2	ASTN2	0	ASTN2_intron		cg24998347	chr9:116549324	-29319.5	.	ASTN2,ASTN2-AS1	ASTN2	.		244	-0.021616	0.517	4.0665e-40	7.9446e-34		1	-0.721658	6.97129e-69	0.52079
chr9:116573014-116573053	2	AC	20	7	26,25,24,22,21,20,19	19	20	22	22	26	.	ASTN2	ASTN2	0	ASTN2_intron		cg01990027	chr9:116550647	-22386.5	.	ASTN2,ASTN2-AS1	ASTN2	.		244	0.02458	0.19576	4.0561e-13	7.92428e-07		1	0.370945	2.17239e-10	0.1376
chr9:116573014-116573053	2	AC	20	7	26,25,24,22,21,20,19	19	20	22	22	26	.	ASTN2	ASTN2	0	ASTN2_intron		cg01606801	chr9:116549427	-23606.5	.	ASTN2,ASTN2-AS1	ASTN2	.		245	0.033703	0.44033	1.8118e-32	3.53966e-26		1	0.701484	7.4585e-65	0.49208
chr9:116573014-116573053	2	AC	20	7	26,25,24,22,21,20,19	19	20	22	22	26	.	ASTN2	ASTN2	0	ASTN2_intron		cg24998347	chr9:116549324	-23709.5	.	ASTN2,ASTN2-AS1	ASTN2	.		244	0.045378	0.54034	9.914e-43	1.93687e-36		1	0.759269	9.40049e-82	0.57649
chr9:116563377-116563417	6	AAAAAT	7	4	8,7,6,5	5	7	7	7	8	.	ASTN2	ASTN2	0	ASTN2_intron		cg01606801	chr9:116549427	-13970	.	ASTN2,ASTN2-AS1	ASTN2	.		245	-0.116341	0.35941	2.6769e-25	5.22978e-19		1	-0.684032	8.74631e-61	0.4679
chr9:116563377-116563417	6	AAAAAT	7	4	8,7,6,5	5	7	7	7	8	.	ASTN2	ASTN2	0	ASTN2_intron		cg24998347	chr9:116549324	-14073	.	ASTN2,ASTN2-AS1	ASTN2	.		244	-0.158689	0.45422	1.1425e-33	2.23207e-27		1	-0.716624	1.21125e-68	0.51355
chr9:116551991-116552046	6	ACATAT	9	3	11,9,7	7	9	9	9	11	.	ASTN2,ASTN2-AS1	ASTN2,ASTN2-AS1	0	ASTN2-AS1_intron,ASTN2_intron		cg01990027	chr9:116550647	-1371.5	.	ASTN2,ASTN2-AS1	ASTN2	.		244	0.064778	0.20181	1.6029e-13	3.13154e-07		1	0.361082	8.18687e-10	0.13038
chr9:116551991-116552046	6	ACATAT	9	3	11,9,7	7	9	9	9	11	.	ASTN2,ASTN2-AS1	ASTN2,ASTN2-AS1	0	ASTN2-AS1_intron,ASTN2_intron		cg01606801	chr9:116549427	-2591.5	.	ASTN2,ASTN2-AS1	ASTN2	.		245	0.102356	0.59593	1.0114e-49	1.97594e-43		1	0.774364	5.62788e-91	0.59964
chr9:116551991-116552046	6	ACATAT	9	3	11,9,7	7	9	9	9	11	.	ASTN2,ASTN2-AS1	ASTN2,ASTN2-AS1	0	ASTN2-AS1_intron,ASTN2_intron		cg24998347	chr9:116549324	-2694.5	.	ASTN2,ASTN2-AS1	ASTN2	.		244	0.138696	0.74234	3.2378e-73	6.32559e-67		1	0.854482	1.75656e-129	0.73014
chr9:11591730-11591756	2	AC	14	4	15,14,13,12	12	14	14	14	15	.	.	PTPRD-AS2	971311	.		cg04232681	chr9:11618265	26522	.	.	PTPRD-AS2	CpG:_37_Island		245	-0.071104	0.16601	3.2441e-11	6.3379e-05		0	0	0	0
chr9:11591730-11591756	2	AC	14	4	15,14,13,12	12	14	14	14	15	.	.	PTPRD-AS2	971311	.		cg14390656	chr9:11618691	26948	.	.	PTPRD-AS2	CpG:_37_Shore_S		243	-0.100691	0.1859	2.0178e-12	3.94212e-06		1	-0.293031	0.000131437	0.085867
chr9:115616859-115616966	4	AAGG	27	11	31,30,29,28,27,26,25,24,23,22,21	21	23	25	28	31	.	.	LOC101928775	122704	.		cg09992948	chr9:115591718	-25194.5	.	.	LOC101928775	.		221	0.035977	0.26281	3.2829e-16	6.4137e-10		1	0.500719	4.86448e-20	0.25072
chr9:115604928-115604966	2	AC	20	4	22,21,20,19	19	20	20	20	22	.	.	LOC101928775	134704	.		cg09992948	chr9:115591718	-13229	.	.	LOC101928775	.		222	-0.289964	0.50649	1.3766e-35	2.68942e-29		1	-0.595735	8.82461e-34	0.3549
chr9:115242508-115242575	2	AT	36	12	49,48,47,46,45,44,40,39,38,37,36,26	26	36	36	37	49	.	DEC1	DEC1	0	DEC1_intron		cg12203575	chr9:115282650	40108.5	.	DEC1	DEC1	.		241	-0.011231	0.17759	8.5621e-12	1.67275e-05		1	-0.526403	1.99602e-28	0.2771
chr9:115161996-115162016	2	AT	11	13	31,30,29,28,27,26,25,24,15,13,12,11,10	10	11	11	11	31	.	DEC1	DEC1	0	DEC1_intron		cg26174004	chr9:115207356	45350	.	DEC1	DEC1	.		245	-0.015855	0.22712	2.6942e-15	5.26358e-09		1	-0.633719	3.42829e-48	0.4016
chr9:114930603-114930640	2	GT	20	7	29,21,20,19,18,17,16	16	18	18	20	29	TNFSF8	.	TNFSF8	9	.		cg10912203	chr9:114894353	-36268.5	.	TNFSF8	TNFSF8	.		243	-0.053702	0.46551	1.2332e-34	2.40927e-28		1	-0.827315	1.68106e-112	0.68445
chr9:114929951-114929989	2	AT/AG	20	3	22,21,20	20	20	20	22	22	TNFSF8	TNFSF8	TNFSF8	0	TNFSF8_intron		cg10912203	chr9:114894353	-35617	.	TNFSF8	TNFSF8	.		241	0.085313	0.5189	7.5846e-40	1.48178e-33		1	0.833271	2.83479e-117	0.69434
chr9:114929875-114929920	2	AT	23	5	26,24,23,22,21	21	21	22	23	26	TNFSF8	TNFSF8	TNFSF8	0	TNFSF8_intron		cg10912203	chr9:114894353	-35544.5	.	TNFSF8	TNFSF8	.		243	-0.082877	0.32972	1.0277e-22	2.00779e-16		1	-0.550191	2.82246e-33	0.30271
chr9:114901035-114901055	2	GT	11	3	13,11,10	10	10	10	11	13	.	TNFSF8	TNFSF8	0	TNFSF8_intron		cg10912203	chr9:114894353	-6692	.	TNFSF8	TNFSF8	.		242	-0.176899	0.69097	3.8955e-63	7.61052e-57		1	-0.905218	4.09637e-173	0.81942
chr9:114866765-114866794	2	GT	15	8	19,18,17,16,15,14,13,11	11	15	16	17	19	.	.	TNFSF8	26549	.		cg10912203	chr9:114894353	27573.5	.	TNFSF8	TNFSF8	.		243	0.034734	0.18617	1.9393e-12	3.78875e-06		1	0.421462	1.25344e-15	0.17763
chr9:114506693-114506736	4	ATTT	12	6	15,14,13,12,11,10	10	10	10	12	15	WHRN	.	WHRN	1221	.		cg13826055	chr9:114496863	-9851.5	.	DFNB31	DFNB31	.		245	-0.02879	0.22167	6.4038e-15	1.25109e-08		1	-0.552485	6.08789e-33	0.30524
chr9:114506478-114506509	2	AC	16	4	17,16,15,14	14	14	16	16	17	WHRN	.	WHRN	1006	.		cg03481131	chr9:114504503	-1990.5	DFNB31	DFNB31	DFNB31	CpG:_168_Island		245	-0.039636	0.25346	3.7823e-17	7.38937e-11		1	-0.569192	4.25023e-36	0.32398
chr9:114506478-114506509	2	AC	16	4	17,16,15,14	14	14	16	16	17	WHRN	.	WHRN	1006	.		cg24488810	chr9:114504536	-1957.5	DFNB31	DFNB31	DFNB31	CpG:_168_Island		245	-0.040917	0.27922	5.0649e-19	9.89514e-13		1	-0.529934	1.13394e-29	0.28083
chr9:114506478-114506509	2	AC	16	4	17,16,15,14	14	14	16	16	17	WHRN	.	WHRN	1006	.		cg13826055	chr9:114496863	-9630.5	.	DFNB31	DFNB31	.		245	0.052717	0.52162	8.717e-41	1.70301e-34		1	0.793013	3.17989e-98	0.62887
chr9:114486886-114487018	2	GT/AT	68	16	68,58,57,56,54,53,52,51,50,49,47,46,45,44,43,41	41	46	46	51	68	.	WHRN	WHRN	0	WHRN_intron		cg13826055	chr9:114496863	9911	.	DFNB31	DFNB31	.		234	-0.01011	0.25576	1.3443e-16	2.62632e-10		1	-0.690695	4.8819e-60	0.47706
chr9:113666148-113666173	4	AAAT	7	4	11,9,8,7	7	7	7	8	11	.	.	RGS3	68406	.		cg21252047	chr9:113657563	-8597.5	.	.	RGS3	.		245	-0.057715	0.19577	3.6266e-13	7.08518e-07		1	-0.471285	1.12487e-21	0.22211
chr9:113657624-113657643	2	AC	11	3	12,11,9	9	11	11	11	12	.	.	RGS3	59882	.		cg21252047	chr9:113657563	-70.5	.	.	RGS3	.		245	-0.147237	0.54735	1.0305e-43	2.01326e-37		1	-0.772587	7.22302e-90	0.59689
chr9:112857756-112857812	4	ATGC/ATCC	15	6	18,17,16,15,14,13	13	14	15	15	18	.	SNX30	SNX30	0	SNX30_intron		cg25023975	chr9:112836653	-21131	.	SNX30	SNX30	.		245	-0.020285	0.20249	1.2877e-13	2.51574e-07		1	-0.41562	5.17826e-15	0.17274
chr9:112822530-112822555	5	GTTTT	5	3	6,5,4	4	5	6	6	6	.	SNX30	SNX30	0	SNX30_intron		cg09011334	chr9:112852784	30241.5	.	SNX30	SNX30	.		224	-0.041998	0.1854	1.5878e-11	3.10204e-05		1	-0.553652	7.70964e-18	0.30653
chr9:112391179-112391202	3	AAT	8	6	14,13,12,11,10,8	8	8	8	8	14	.	HSDL2	HSDL2	0	HSDL2_intron		cg11203771	chr9:112378573	-12617.5	HSDL2	.	HSDL2	CpG:_76_Shore_N		244	0.044764	0.21196	3.3299e-14	6.50553e-08		1	0.453927	1.96901e-19	0.20605
chr9:112376157-112376178	2	AT	11	12	20,19,18,17,16,15,14,12,11,10,9,6	6	10	11	11	20	.	.	HSDL2	3731	.		cg11203771	chr9:112378573	2405.5	HSDL2	.	HSDL2	CpG:_76_Shore_N		202	0.02341	0.3369	1.3836e-19	2.7031e-13		1	0.557817	4.01748e-28	0.31116
chr9:112365155-112365199	4	ATCT	11	3	11,10,9	9	10	10	11	11	.	.	HSDL2	14710	.		cg11203771	chr9:112378573	13396	HSDL2	.	HSDL2	CpG:_76_Shore_N		244	0.100725	0.18792	1.3388e-12	2.61557e-06		1	0.442063	6.00724e-18	0.19542
chr9:112342730-112342752	3	AAG	8	12	22,19,18,16,15,14,13,12,11,10,9,8	8	8	8	15	22	.	.	PTBP3	9067	.		cg11203771	chr9:112378573	35832	HSDL2	.	HSDL2	CpG:_76_Shore_N		244	0.015025	0.18294	2.8428e-12	5.55389e-06		1	0.340015	4.9968e-08	0.11561
chr9:112181157-112181194	2	AC	20	14	31,30,29,28,27,26,25,24,23,22,21,20,19,17	17	24	26	28	31	.	.	SUSD1	5861	.		cg13873269	chr9:112175735	-5440.5	SUSD1	MIR3134	MIR3134	CpG:_79_Shore_S		244	0.01248	0.24625	1.423e-16	2.78007e-10		1	0.601141	2.55938e-41	0.36137
chr9:112181157-112181194	2	AC	20	14	31,30,29,28,27,26,25,24,23,22,21,20,19,17	17	24	26	28	31	.	.	SUSD1	5861	.		cg04230060	chr9:112175712	-5463.5	SUSD1	MIR3134	MIR3134	CpG:_79_Shore_S		244	0.015284	0.29005	9.3912e-20	1.83473e-13		1	0.635138	2.17924e-48	0.4034
chr9:112176496-112176584	4	AGAT	22	12	28,27,26,25,24,23,22,21,20,19,18,17	17	20	21	23	28	SUSD1	.	SUSD1	1200	.		cg14195117	chr9:112174303	-2237	SUSD1	MIR3134,SUSD1	SUSD1	CpG:_79_Shore_N		245	0.008802	0.15192	2.592e-10	0.000506391		0	0	0	0
chr9:111891412-111891437	4	ATTT	7	3	8,7,5	5	7	7	8	8	.	.	UGCG	5377	.		cg26641130	chr9:111867105	-24319.5	.	.	UGCG	.		238	-0.045572	0.15343	3.7756e-10	0.000737628		1	-0.489449	5.67193e-23	0.23956
chr9:111850822-111850869	3	ATT	17	7	18,17,16,15,14,13,12	12	14	15	16	18	.	.	UGCG	45945	.		cg26641130	chr9:111867105	16259.5	.	.	UGCG	.		241	-0.02239	0.19877	3.5887e-13	7.01114e-07		1	-0.429849	4.36787e-16	0.18477
chr9:111781725-111781753	4	AAAT	7	8	14,13,12,11,10,9,8,7	7	9	9	11	14	SHOC1	SHOC1	SHOC1	0	SHOC1_intron		cg06643227	chr9:111794959	13220	C9orf84	C9orf84	C9orf84	CpG:_22_Shore_N		242	-0.011651	0.1726	1.624e-11	3.17276e-05		0	0	0	0
chr9:111781725-111781753	4	AAAT	7	8	14,13,12,11,10,9,8,7	7	9	9	11	14	SHOC1	SHOC1	SHOC1	0	SHOC1_intron		cg13688329	chr9:111795110	13371	C9orf84	.	C9orf84	CpG:_22_Island		244	-0.009113	0.17287	1.2855e-11	2.51144e-05		0	0	0	0
chr9:111781725-111781753	4	AAAT	7	8	14,13,12,11,10,9,8,7	7	9	9	11	14	SHOC1	SHOC1	SHOC1	0	SHOC1_intron		cg13314167	chr9:111795273	13534	C9orf84	.	C9orf84	CpG:_22_Island		243	-0.017661	0.19345	6.4451e-13	1.25916e-06		1	-0.448676	1.03256e-18	0.20131
chr9:111748740-111748829	4	CCTT	23	4	23,22,21,19	19	23	23	23	23	.	SHOC1	SHOC1	0	SHOC1_intron		cg13688329	chr9:111795110	46325.5	C9orf84	.	C9orf84	CpG:_22_Island		233	0.022432	0.21921	4.2688e-14	8.33983e-08		0	0	0	0
chr9:111748740-111748829	4	CCTT	23	4	23,22,21,19	19	23	23	23	23	.	SHOC1	SHOC1	0	SHOC1_intron		cg06643227	chr9:111794959	46174.5	C9orf84	C9orf84	C9orf84	CpG:_22_Shore_N		232	0.028863	0.22426	2.2724e-14	4.43952e-08		0	0	0	0
chr9:111187892-111187910	2	AT	10	4	15,14,13,10	10	10	10	13	15	.	.	MIR7702	83246	.		cg24562906	chr9:111148452	-39449	.	.	LPAR1	.		242	-0.03744	0.36033	4.414e-25	8.6235e-19		1	-0.650469	3.46392e-52	0.42311
chr9:110032692-110032779	4	AAAT	23	7	24,23,22,21,20,19,18	18	18	21	22	24	.	PALM2-AKAP2	PALM2-AKAP2	0	PALM2-AKAP2_intron		cg14768206	chr9:110027884	-4851.5	.	PALM2-AKAP2	PALM2-AKAP2	.		245	-0.037565	0.37324	1.8504e-26	3.61507e-20		1	-0.760184	1.38713e-83	0.57788
chr9:109969089-109969113	2	AC	14	15	26,25,24,23,22,21,20,19,18,17,16,15,14,13,11	11	15	15	16	26	.	PALM2-AKAP2	PALM2-AKAP2	0	PALM2-AKAP2_intron		cg12578540	chr9:109968484	-617	.	PALM2-AKAP2	PALM2-AKAP2	.		242	-0.015461	0.24413	2.6657e-16	5.2079e-10		1	-0.616701	1.68198e-44	0.38032
chr9:109873443-109873497	5	AAAAT	11	9	14,13,12,11,10,9,8,7,6	6	6	8	10	14	.	PALM2-AKAP2	PALM2-AKAP2	0	PALM2-AKAP2_intron		cg11358988	chr9:109880626	7156	.	PALM2,PALM2-AKAP2	PALM2-AKAP2	.		245	0.018728	0.21072	3.5832e-14	7.00039e-08		1	0.39105	1.49941e-12	0.15292
chr9:109320481-109320510	6	CCGCTG	5	5	7,6,5,4,3	3	5	5	5	7	EPB41L4B	EPB41L4B	EPB41L4B	0	EPB41L4B_5utr		cg14306058	chr9:109316300	-4195.5	.	EPB41L4B	EPB41L4B	CpG:_116_Shelf_N		245	-0.080463	0.23835	4.4477e-16	8.68934e-10		1	-0.416053	3.84582e-15	0.1731
chr9:109318151-109318181	2	GT	16	9	20,18,17,16,15,14,13,12,10	10	14	15	15.75	20	.	EPB41L4B	EPB41L4B	0	EPB41L4B_intron		cg14306058	chr9:109316300	-1866	.	EPB41L4B	EPB41L4B	CpG:_116_Shelf_N		245	0.042407	0.61248	6.1961e-52	1.21051e-45		1	0.707404	2.64844e-67	0.50042
chr9:108858824-108858872	2	AC	25	11	28,27,26,25,24,23,22,21,19,18,17	17	17	23	25	28	.	.	ACTL7B	2839	.		cg18412092	chr9:108858442	-406	.	.	ACTL7B	CpG:_67_Shelf_S		245	0.015589	0.51178	1.0462e-39	2.04393e-33		1	0.753983	3.70566e-81	0.56849
chr9:108808963-108809003	2	AC/CT	23	6	25,24,23,22,21,20	20	22	23	23	25	.	.	ACTL7B	45586	.		cg13837146	chr9:108786469	-22514	.	.	ACTL7B	.		243	0.119146	0.21671	1.795e-14	3.50684e-08		1	0.38735	3.67767e-12	0.15004
chr9:108463084-108463193	2	AT	58	20	61,60,59,58,57,55,53,52,51,50,49,48,47,44,38,37,36,35,34,33	33	34	49	50	61	.	.	ACTL7B	391396	.		cg10619899	chr9:108478655	15516.5	.	.	ACTL7B	.		231	0.002678	0.17517	3.2762e-11	6.40061e-05		1	0.428742	2.8342e-14	0.18382
chr9:106856569-106856585	2	AT	9	4	11,10,9,8	8	8	9	9	11	.	.	ZNF462	6581	.		cg09042911	chr9:106844529	-12048	.	.	ZNF462	.		245	0.030973	0.15353	2.0469e-10	0.000399897		1	0.33541	9.67923e-08	0.1125
chr9:106854815-106854840	2	GT	13	4	15,14,13,12	12	12	13	13	15	.	.	ZNF462	8326	.		cg09042911	chr9:106844529	-10298.5	.	.	ZNF462	.		245	0.031637	0.19937	2.0847e-13	4.07282e-07		1	0.329074	2.86787e-07	0.10829
chr9:106848307-106848322	2	AT	8	3	9,8,7	7	7	8	8	9	.	.	ZNF462	14844	.		cg09042911	chr9:106844529	-3785.5	.	.	ZNF462	.		245	0.034938	0.21007	3.9633e-14	7.74298e-08		1	0.359277	8.26125e-10	0.12908
chr9:105731296-105731323	3	ATT	9	4	10,9,8,7	7	9	9	9	10	.	TMEM38B	TMEM38B	0	TMEM38B_intron		cg22141473	chr9:105693167	-38142.5	TMEM38B	.	TMEM38B	CpG:_89_Shore_N		244	-0.037465	0.15509	1.7741e-10	0.000346601		1	-0.298164	4.41093e-05	0.088902
chr9:105716375-105716391	2	GT	9	9	21,19,18,17,16,15,14,13,9	9	9	9	14	21	.	TMEM38B	TMEM38B	0	TMEM38B_intron		cg22141473	chr9:105693167	-23216	TMEM38B	.	TMEM38B	CpG:_89_Shore_N		244	0.012269	0.36762	6.9487e-26	1.35755e-19		1	0.536489	1.29963e-30	0.28782
chr9:105272963-105272991	2	AT	15	4	17,16,15,14	14	15	15	15	17	.	SLC44A1	SLC44A1	0	SLC44A1_intron		cg06603680	chr9:105270923	-2054	.	SLC44A1	SLC44A1	.		237	0.081628	0.33138	2.5731e-22	5.02699e-16		1	0.6634	1.69888e-53	0.4401
chr9:105256742-105256798	5	ATTTT	11	9	15,14,13,12,11,10,9,8,7	7	11	11	12	15	.	SLC44A1	SLC44A1	0	SLC44A1_intron		cg06603680	chr9:105270923	14153	.	SLC44A1	SLC44A1	.		244	0.021858	0.20535	9.2955e-14	1.81603e-07		1	0.475805	5.00306e-22	0.22639
chr9:105222632-105222666	2	AC	18	10	24,22,21,20,19,18,17,14,13,12	12	18	18	18	24	.	.	SLC44A1	21939	.		cg06603680	chr9:105270923	48274	.	SLC44A1	SLC44A1	.		245	0.017101	0.32013	3.9108e-22	7.64041e-16		1	0.562379	3.60348e-35	0.31627
chr9:105022710-105022789	5	ATTTT	17	11	21,19,18,17,16,15,13,12,8,7,6	6	7	12	17	21	.	.	ABCA1	94556	.		cg00886211	chr9:104993180	-29569.5	.	.	ABCA1	.		245	0.014877	0.44412	7.913e-33	1.54594e-26		1	0.768889	4.23163e-85	0.59119
chr9:104995635-104995780	2	AT/GT/AT	73	8	73,64,63,62,60,55,54,42	42	55	62	73	73	.	.	ABCA1	67481	.		cg00886211	chr9:104993180	-2527.5	.	.	ABCA1	.		152	0.010224	0.39762	3.1568e-18	6.16735e-12		1	0.58031	7.01474e-18	0.33676
chr9:104928892-104928918	4	AAAC	7	3	9,8,7	7	7	7.5	8	9	ABCA1	.	ABCA1	738	.		cg14019050	chr9:104928489	-416	ABCA1	.	ABCA1	CpG:_73_Island		244	-0.114289	0.3939	3.9516e-28	7.72012e-22		1	-0.549026	1.35433e-31	0.30143
chr9:101477212-101477242	4	AAAC	8	5	11,10,9,8,7	7	8	9	10	11	.	TMEM246,TMEM246-AS1	TMEM246-AS1,TMEM246	0	TMEM246-AS1_intron,TMEM246_intron		cg06473925	chr9:101479213	1986	.	TMEM246,TMEM246-AS1	TMEM246-AS1	.		242	0.07217	0.15823	1.3357e-10	0.000260952		1	0.53899	5.25675e-31	0.29051
chr9:101447524-101447543	2	AT	10	14	24,23,22,21,20,19,17,14,13,12,11,10,9,7	7	10	11	11	24	.	.	ALDOB	11751	.		cg12039769	chr9:101449824	2290.5	.	.	ALDOB	CpG:_37_Shore_S		244	-0.006656	0.19775	2.9931e-13	5.84753e-07		1	-0.313421	4.14178e-06	0.098233
chr9:100519414-100519444	4	AAAT	8	3	10,9,8	8	8	8	8.75	10	.	MSANTD3-TMEFF1,TMEFF1	MSANTD3-TMEFF1,TMEFF1	0	MSANTD3-TMEFF1_intron,TMEFF1_intron		cg24365551	chr9:100472659	-46770	TMEFF1	MSANTD3-TMEFF1	MSANTD3-TMEFF1	CpG:_132_Shore_N		245	0.089951	0.28414	2.183e-19	4.26486e-13		1	0.389808	1.41326e-12	0.15195
chr9:100438428-100438445	2	GT	9	4	13,10,9,7	7	9	9	10	13	.	MSANTD3	MSANTD3	0	MSANTD3_intron		cg24365551	chr9:100472659	34222.5	TMEFF1	MSANTD3-TMEFF1	MSANTD3-TMEFF1	CpG:_132_Shore_N		245	0.019146	0.16144	6.3902e-11	0.000124843		1	0.381025	1.04646e-11	0.14518
chr9:100354688-100354707	2	AG	10	3	10,7,5	5	7	10	10	10	TEX10	.	TEX10	1747	.		cg15138245	chr9:100370100	15402.5	.	.	TEX10	.		244	0.062969	0.36226	1.9451e-25	3.80008e-19		1	0.619346	2.33035e-45	0.38359
chr8:9950196-9950217	2	GT	11	5	13,12,11,10,9	9	11	12	12	13	.	.	MIR124-1	46725	.		cg05566310	chr8:9950152	-54.5	.	.	MIR124-1	.		241	0.027383	0.16206	8.3682e-11	0.000163487		1	0.316575	3.72367e-06	0.10022
chr8:98280737-98280802	2	AT/AG	34	18	48,47,46,45,44,43,42,41,40,39,38,37,36,35,34,33,32,31	31	38	43	45	48	.	NIPAL2	NIPAL2	0	NIPAL2_intron		cg12860109	chr8:98247300	-33469.5	.	NIPAL2	NIPAL2	.		237	0.013463	0.2611	3.6426e-17	7.11644e-11		1	0.54647	2.18217e-18	0.29863
chr8:97893562-97893597	4	ATTT	9	6	12,11,10,9,8,6	6	6	10	11	12	.	MATN2	MATN2	0	MATN2_intron		cg19139111	chr8:97893383	-196.5	.	MATN2	MATN2	.		242	-0.015836	0.18005	5.3727e-12	1.04965e-05		1	-0.39365	1.18461e-12	0.15496
chr8:97834548-97834582	2	GT	18	3	18,17,16	16	17	17	17	18	.	LAPTM4B	LAPTM4B	0	LAPTM4B_intron		cg24934137	chr8:97857009	22444	.	.	LAPTM4B	.		242	-0.042853	0.16579	4.4272e-11	8.64929e-05		1	-0.404277	3.65457e-14	0.16344
chr8:97834548-97834582	2	GT	18	3	18,17,16	16	17	17	17	18	.	LAPTM4B	LAPTM4B	0	LAPTM4B_intron		cg12415110	chr8:97822233	-12332	.	LAPTM4B	LAPTM4B	.		245	-0.110035	0.18556	1.723e-12	3.36617e-06		0	0	0	0
chr8:97272266-97272322	2	AC	29	17	33,32,31,30,29,28,27,26,25,24,23,22,21,19,18,17,4	4	25	29	30	33	.	LOC101927066	LOC101927066	0	LOC101927066_intron		cg05130482	chr8:97259721	-12573	.	LOC101927066	LOC101927066	.		244	-0.024314	0.1953	4.3525e-13	8.50335e-07		0	0	0	0
chr8:972617-972644	4	ATTT	7	6	12,11,10,9,8,7	7	7	7	10	12	.	DLGAP2	DLGAP2	0	DLGAP2_intron		cg20449379	chr8:1018983	46352.5	.	ERICH1-AS1	ERICH1-AS1	CpG:_15_Shore_S		235	-0.010466	0.17952	1.1784e-11	2.3022e-05		1	-0.349971	4.04528e-08	0.12248
chr8:96687150-96687227	5	CTTTT	17	3	18,17,16	16	17	17	17	18	.	CPQ	CPQ	0	CPQ_intron		cg22516649	chr8:96706706	19517.5	.	CPQ	CPQ	.		237	-0.110485	0.21861	2.8278e-14	5.52459e-08		1	-0.380697	2.11797e-09	0.14493
chr8:96279819-96279854	4	AAAT	9	6	12,11,10,9,8,6	6	8	9	9	12	.	PTDSS1	PTDSS1	0	PTDSS1_intron		cg02454318	chr8:96272799	-7037.5	.	PTDSS1	PTDSS1	.		238	-0.036527	0.15957	1.5691e-10	0.00030655		1	-0.536097	4.14942e-30	0.2874
chr8:96232834-96232860	4	AAAT	7	3	8,7,6	6	6	7	7	8	.	UQCRB	UQCRB	0	UQCRB_intron		cg02454318	chr8:96272799	39952	.	PTDSS1	PTDSS1	.		238	-0.047187	0.18267	5.4882e-12	1.07221e-05		1	-0.450821	1.29386e-18	0.20324
chr8:95474499-95474514	2	CT	11	6	14,13,12,11,10,9	9	11	11	12	14	.	C8orf37-AS1	C8orf37-AS1	0	C8orf37-AS1_intron		cg22405820	chr8:95503939	29432.5	.	C8orf37-AS1	C8orf37-AS1	.		243	0.082873	0.25683	2.9289e-17	5.7221e-11		1	0.54	2.4525e-30	0.2916
chr8:95469517-95469532	2	AG	9	3	9,8,7	7	9	9	9	9	.	C8orf37-AS1	C8orf37-AS1	0	C8orf37-AS1_intron		cg22405820	chr8:95503939	34414.5	.	C8orf37-AS1	C8orf37-AS1	.		244	-0.236811	0.3047	7.3595e-21	1.4378e-14		1	-0.620105	2.94636e-46	0.38453
chr8:95089463-95089476	2	AT	10	5	13,12,11,10,9	9	10	10	11	13	.	NDUFAF6	NDUFAF6	0	NDUFAF6_intron		cg05705068	chr8:95090301	831.5	.	.	LOC105375650	.		245	-0.065017	0.3287	8.2638e-23	1.61447e-16		1	-0.605012	5.79544e-43	0.36604
chr8:94977599-94977620	2	CT	11	3	12,11,9	9	9	9	11	12	.	NDUFAF6	NDUFAF6	0	NDUFAF6_intron		cg12838385	chr8:94949850	-27759.5	TP53INP1	.	TP53INP1	CpG:_130_Island		245	0.01666	0.1631	4.9977e-11	9.76386e-05		1	0.422493	5.92111e-16	0.1785
chr8:94977599-94977620	2	CT	11	3	12,11,9	9	9	9	11	12	.	NDUFAF6	NDUFAF6	0	NDUFAF6_intron		cg23172400	chr8:94950139	-27470.5	TP53INP1	.	TP53INP1	CpG:_130_Island		245	0.047905	0.20211	1.3657e-13	2.66813e-07		1	0.413255	5.6733e-15	0.17078
chr8:94977599-94977620	2	CT	11	3	12,11,9	9	9	9	11	12	.	NDUFAF6	NDUFAF6	0	NDUFAF6_intron		cg06542216	chr8:94949947	-27662.5	TP53INP1	.	TP53INP1	CpG:_130_Island		243	0.042541	0.2165	1.8531e-14	3.62035e-08		1	0.495964	6.13389e-25	0.24598
chr8:94977599-94977620	2	CT	11	3	12,11,9	9	9	9	11	12	.	NDUFAF6	NDUFAF6	0	NDUFAF6_intron		cg16049864	chr8:94949856	-27753.5	TP53INP1	.	TP53INP1	CpG:_130_Island		245	0.035348	0.22332	4.9272e-15	9.62612e-09		1	0.480375	7.60139e-23	0.23076
chr8:94977599-94977620	2	CT	11	3	12,11,9	9	9	9	11	12	.	NDUFAF6	NDUFAF6	0	NDUFAF6_intron		cg13393036	chr8:94950143	-27466.5	TP53INP1	.	TP53INP1	CpG:_130_Island		245	0.066544	0.22647	2.9884e-15	5.83835e-09		1	0.498046	3.17088e-25	0.24805
chr8:94977599-94977620	2	CT	11	3	12,11,9	9	9	9	11	12	.	NDUFAF6	NDUFAF6	0	NDUFAF6_intron		cg09323728	chr8:94950124	-27485.5	TP53INP1	.	TP53INP1	CpG:_130_Island		245	0.056982	0.23063	1.5389e-15	3.0065e-09		1	0.475037	3.73639e-22	0.22566
chr8:94977599-94977620	2	CT	11	3	12,11,9	9	9	9	11	12	.	NDUFAF6	NDUFAF6	0	NDUFAF6_intron		cg20039814	chr8:94950155	-27454.5	TP53INP1	.	TP53INP1	CpG:_130_Shore_S		244	0.071859	0.24688	1.2844e-16	2.50929e-10		1	0.483343	3.09239e-23	0.23362
chr8:94977599-94977620	2	CT	11	3	12,11,9	9	9	9	11	12	.	NDUFAF6	NDUFAF6	0	NDUFAF6_intron		cg18059933	chr8:94950235	-27374.5	TP53INP1	.	TP53INP1	CpG:_130_Shore_S		245	0.079622	0.25747	1.9504e-17	3.81044e-11		1	0.50706	1.98036e-26	0.25711
chr8:94940446-94940470	2	GT	13	6	14,13,12,11,10,8	8	10	10	13	14	.	NDUFAF6,TP53INP1	NDUFAF6,TP53INP1	0	NDUFAF6_intron,TP53INP1_intron		cg12838385	chr8:94949850	9392	TP53INP1	.	TP53INP1	CpG:_130_Island		245	0.012354	0.21336	2.3707e-14	4.63157e-08		1	0.476319	1.9741e-22	0.22688
chr8:94940446-94940470	2	GT	13	6	14,13,12,11,10,8	8	10	10	13	14	.	NDUFAF6,TP53INP1	NDUFAF6,TP53INP1	0	NDUFAF6_intron,TP53INP1_intron		cg23172400	chr8:94950139	9681	TP53INP1	.	TP53INP1	CpG:_130_Island		245	0.036225	0.27494	1.0464e-18	2.04432e-12		1	0.483973	1.95245e-23	0.23423
chr8:94940446-94940470	2	GT	13	6	14,13,12,11,10,8	8	10	10	13	14	.	NDUFAF6,TP53INP1	NDUFAF6,TP53INP1	0	NDUFAF6_intron,TP53INP1_intron		cg13393036	chr8:94950143	9685	TP53INP1	.	TP53INP1	CpG:_130_Island		245	0.047705	0.2769	7.5155e-19	1.46828e-12		1	0.565889	6.04071e-36	0.32023
chr8:94940446-94940470	2	GT	13	6	14,13,12,11,10,8	8	10	10	13	14	.	NDUFAF6,TP53INP1	NDUFAF6,TP53INP1	0	NDUFAF6_intron,TP53INP1_intron		cg09323728	chr8:94950124	9666	TP53INP1	.	TP53INP1	CpG:_130_Island		245	0.040712	0.28008	4.3752e-19	8.5477e-13		1	0.529131	6.58077e-30	0.27998
chr8:94940446-94940470	2	GT	13	6	14,13,12,11,10,8	8	10	10	13	14	.	NDUFAF6,TP53INP1	NDUFAF6,TP53INP1	0	NDUFAF6_intron,TP53INP1_intron		cg06542216	chr8:94949947	9489	TP53INP1	.	TP53INP1	CpG:_130_Island		243	0.032275	0.29661	3.6102e-20	7.05314e-14		1	0.553127	9.1609e-34	0.30595
chr8:94940446-94940470	2	GT	13	6	14,13,12,11,10,8	8	10	10	13	14	.	NDUFAF6,TP53INP1	NDUFAF6,TP53INP1	0	NDUFAF6_intron,TP53INP1_intron		cg18059933	chr8:94950235	9777	TP53INP1	.	TP53INP1	CpG:_130_Shore_S		245	0.056416	0.30751	3.7277e-21	7.2827e-15		1	0.573062	3.97168e-37	0.3284
chr8:94940446-94940470	2	GT	13	6	14,13,12,11,10,8	8	10	10	13	14	.	NDUFAF6,TP53INP1	NDUFAF6,TP53INP1	0	NDUFAF6_intron,TP53INP1_intron		cg16049864	chr8:94949856	9398	TP53INP1	.	TP53INP1	CpG:_130_Island		245	0.027082	0.31188	1.715e-21	3.35054e-15		1	0.532353	2.07647e-30	0.2834
chr8:94940446-94940470	2	GT	13	6	14,13,12,11,10,8	8	10	10	13	14	.	NDUFAF6,TP53INP1	NDUFAF6,TP53INP1	0	NDUFAF6_intron,TP53INP1_intron		cg20039814	chr8:94950155	9697	TP53INP1	.	TP53INP1	CpG:_130_Shore_S		244	0.053786	0.32903	9.5171e-23	1.85933e-16		1	0.556678	2.3143e-34	0.30989
chr8:94931588-94931610	2	AC	12	6	17,16,15,14,13,10	10	14	14	15	17	.	NDUFAF6,TP53INP1	NDUFAF6,TP53INP1	0	NDUFAF6_intron,TP53INP1_intron		cg12838385	chr8:94949850	18251	TP53INP1	.	TP53INP1	CpG:_130_Island		245	0.024716	0.18303	2.5274e-12	4.93771e-06		1	0.453674	2.36911e-19	0.20582
chr8:94931588-94931610	2	AC	12	6	17,16,15,14,13,10	10	14	14	15	17	.	NDUFAF6,TP53INP1	NDUFAF6,TP53INP1	0	NDUFAF6_intron,TP53INP1_intron		cg13393036	chr8:94950143	18544	TP53INP1	.	TP53INP1	CpG:_130_Island		245	0.089924	0.21089	3.4898e-14	6.81792e-08		1	0.529254	1.44047e-29	0.28011
chr8:94931588-94931610	2	AC	12	6	17,16,15,14,13,10	10	14	14	15	17	.	NDUFAF6,TP53INP1	NDUFAF6,TP53INP1	0	NDUFAF6_intron,TP53INP1_intron		cg09323728	chr8:94950124	18525	TP53INP1	.	TP53INP1	CpG:_130_Island		245	0.077797	0.21921	9.4456e-15	1.84536e-08		1	0.4824	6.14602e-23	0.23271
chr8:94931588-94931610	2	AC	12	6	17,16,15,14,13,10	10	14	14	15	17	.	NDUFAF6,TP53INP1	NDUFAF6,TP53INP1	0	NDUFAF6_intron,TP53INP1_intron		cg18059933	chr8:94950235	18636	TP53INP1	.	TP53INP1	CpG:_130_Shore_S		245	0.103526	0.22195	6.1246e-15	1.19654e-08		1	0.547686	2.14713e-32	0.29996
chr8:94931588-94931610	2	AC	12	6	17,16,15,14,13,10	10	14	14	15	17	.	NDUFAF6,TP53INP1	NDUFAF6,TP53INP1	0	NDUFAF6_intron,TP53INP1_intron		cg06542216	chr8:94949947	18348	TP53INP1	.	TP53INP1	CpG:_130_Island		243	0.061212	0.22761	3.2381e-15	6.32618e-09		1	0.533592	3.09865e-30	0.28472
chr8:94931588-94931610	2	AC	12	6	17,16,15,14,13,10	10	14	14	15	17	.	NDUFAF6,TP53INP1	NDUFAF6,TP53INP1	0	NDUFAF6_intron,TP53INP1_intron		cg23172400	chr8:94950139	18540	TP53INP1	.	TP53INP1	CpG:_130_Island		245	0.071846	0.2318	1.2742e-15	2.48937e-09		1	0.495732	1.01073e-24	0.24575
chr8:94931588-94931610	2	AC	12	6	17,16,15,14,13,10	10	14	14	15	17	.	NDUFAF6,TP53INP1	NDUFAF6,TP53INP1	0	NDUFAF6_intron,TP53INP1_intron		cg20039814	chr8:94950155	18556	TP53INP1	.	TP53INP1	CpG:_130_Shore_S		244	0.0981	0.23387	1.047e-15	2.04549e-09		1	0.553796	1.77788e-33	0.30669
chr8:94931588-94931610	2	AC	12	6	17,16,15,14,13,10	10	14	14	15	17	.	NDUFAF6,TP53INP1	NDUFAF6,TP53INP1	0	NDUFAF6_intron,TP53INP1_intron		cg16049864	chr8:94949856	18257	TP53INP1	.	TP53INP1	CpG:_130_Island		245	0.052251	0.24882	8.0955e-17	1.58159e-10		1	0.54439	6.10335e-32	0.29636
chr8:94711380-94711427	3	ATT	16	8	17,16,15,14,13,12,11,10	10	11	14	15	17	.	.	ESRP1	3915	.		cg17775812	chr8:94705636	-5767.5	.	ESRP1	ESRP1	.		158	0.013604	0.33119	2.5877e-15	5.05551e-09		0	0	0	0
chr8:94638208-94638230	3	AAC	8	4	11,10,9,8	8	8	8	10	11	LOC100288748	LOC100288748	LOC100288748	0	LOC100288748_3utr		cg06699564	chr8:94638871	652	LOC100288748	LOC100288748	LOC100288748	CpG:_39_Shore_N,CpG:_51_Shore_N		245	0.049512	0.18353	2.3448e-12	4.58097e-06		0	0	0	0
chr8:94638208-94638230	3	AAC	8	4	11,10,9,8	8	8	8	10	11	LOC100288748	LOC100288748	LOC100288748	0	LOC100288748_3utr		cg03189153	chr8:94638728	509	LOC100288748	LOC100288748	LOC100288748	CpG:_39_Shore_N,CpG:_51_Shore_N		245	0.079251	0.38107	3.9819e-27	7.77932e-21		1	0.580345	4.36435e-38	0.3368
chr8:9268148-9268192	4	ATTC	11	6	12,11,10,9,8,7	7	9	9	10	12	.	.	LOC157273	56859	.		cg11070274	chr8:9249100	-19070	.	.	LOC101929128	.		245	-0.119718	0.16182	6.0347e-11	0.000117898		1	-0.44699	2.54998e-18	0.1998
chr8:9268148-9268192	4	ATTC	11	6	12,11,10,9,8,7	7	9	9	10	12	.	.	LOC157273	56859	.		cg25960393	chr8:9249049	-19121	.	.	LOC101929128	.		245	-0.126588	0.16398	4.388e-11	8.5727e-05		1	-0.457296	1.58026e-19	0.20912
chr8:92632723-92632751	2	GT	16	7	21,20,19,18,17,16,14	14	16	16	18	21	.	LOC102724710	LOC102724710	0	LOC102724710_intron		cg19478735	chr8:92627073	-5664	.	LOC102724710	LOC102724710	.		245	0.047917	0.20319	1.1558e-13	2.25805e-07		1	0.60784	1.9878e-43	0.36947
chr8:9161955-9162015	4	AAAC/AAAG	15	8	16,15,14,13,12,11,10,9	9	10	13	14	16	.	.	PPP1R3B	10417	.		cg23217680	chr8:9171946	9961	.	.	LOC101929128	.		244	0.029727	0.2026	1.4196e-13	2.77343e-07		1	0.32915	2.83322e-07	0.10834
chr8:9100265-9100280	3	AAT	6	3	6,5,4	4	4	6	6	6	.	.	ERI1	163	.		cg06386266	chr8:9103420	3147.5	.	.	PPP1R3B	.		245	-0.011514	0.18683	1.4201e-12	2.77441e-06		1	-0.632677	1.2388e-48	0.40028
chr8:9067924-9067944	2	AC	11	7	15,14,13,12,11,10,9	9	11	11	13	15	.	ERI1	ERI1	0	ERI1_intron		cg13945661	chr8:9037682	-30252	.	.	ERI1	.		170	0.06239	0.30381	6.7706e-15	1.32275e-08		1	0.569034	1.46707e-22	0.3238
chr8:9067383-9067420	2	GT	20	11	25,24,23,22,21,20,19,18,17,15,11	11	18	18	21	25	.	ERI1	ERI1	0	ERI1_intron		cg13945661	chr8:9037682	-29719.5	.	.	ERI1	.		170	0.02293	0.23576	1.9309e-11	3.77234e-05		1	0.583935	5.48284e-25	0.34098
chr8:88591142-88591172	3	GTT	10	5	11,10,9,8,7	7	10	10	10	11	.	.	MMP16	263660	.		cg09462937	chr8:88554617	-36540	.	.	MMP16	.		245	-0.044555	0.38174	3.4836e-27	6.8058e-21		1	-0.554121	1.57295e-33	0.30705
chr8:88562261-88562401	4	ATCT	36	5	36,35,34,33,32	32	34	34	35	36	.	.	MMP16	234779	.		cg09462937	chr8:88554617	-7714	.	.	MMP16	.		242	-0.038508	0.20486	1.2657e-13	2.47276e-07		1	-0.426673	4.85821e-12	0.18205
chr8:88556291-88556345	4	ATGT	14	8	17,16,15,14,13,12,11,9	9	14	14	14	17	.	.	MMP16	228809	.		cg09462937	chr8:88554617	-1701	.	.	MMP16	.		245	-0.043844	0.37545	1.2012e-26	2.34675e-20		1	-0.55612	3.46587e-34	0.30927
chr8:88551185-88551232	5	GTTTT	10	6	12,11,10,9,8,6	6	8	9	9	12	.	.	MMP16	223703	.		cg09462937	chr8:88554617	3408.5	.	.	MMP16	.		244	-0.04056	0.42651	4.7232e-31	9.22757e-25		1	-0.55089	1.91843e-32	0.30348
chr8:88529645-88529675	2	AC	16	3	18,17,16	16	16	16	16	18	.	.	MMP16	202163	.		cg09462937	chr8:88554617	24957	.	.	MMP16	.		245	0.119295	0.4034	4.4565e-29	8.70653e-23		1	0.594971	4.26334e-41	0.35399
chr8:8852471-8852517	2	AC	24	6	25,24,23,22,21,20	20	21	24	24	25	.	MFHAS1	MFHAS1	0	MFHAS1_intron		cg00459354	chr8:8851487	-1007	.	MFHAS1	MFHAS1	.		245	-0.034722	0.32	4.0027e-22	7.81995e-16		1	-0.695687	1.14177e-63	0.48398
chr8:88518683-88518770	2	AT	44	3	44,35,32	32	35	44	44	44	.	.	MMP16	191201	.		cg09462937	chr8:88554617	35890.5	.	.	MMP16	.		243	-0.008777	0.26103	1.4678e-17	2.8676e-11		1	-0.435006	7.11418e-17	0.18923
chr8:88509130-88509154	2	AT	13	6	17,16,15,14,13,12	12	13	13	14	17	.	.	MMP16	181648	.		cg09462937	chr8:88554617	45475	.	.	MMP16	.		244	-0.033419	0.19868	2.5944e-13	5.0686e-07		1	-0.407958	2.41863e-14	0.16643
chr8:88505083-88505117	5	AAAAC	7	5	11,10,9,8,7	7	7	7	8	11	.	.	MMP16	177601	.		cg09462937	chr8:88554617	49517	.	.	MMP16	.		245	0.043123	0.20042	1.774e-13	3.46581e-07		1	0.433647	8.13186e-17	0.18805
chr8:8832049-8832089	2	CG/AC	23	11	29,28,27,26,25,24,23,22,21,20,19	19	21	24	26	29	.	MFHAS1	MFHAS1	0	MFHAS1_intron		cg05986838	chr8:8786020	-46049	.	MFHAS1	MFHAS1	.		242	0.012134	0.15765	1.4532e-10	0.000283907		1	0.547932	6.86206e-32	0.30023
chr8:8832049-8832089	2	CG/AC	23	11	29,28,27,26,25,24,23,22,21,20,19	19	21	24	26	29	.	MFHAS1	MFHAS1	0	MFHAS1_intron		cg19034770	chr8:8783743	-48326	.	.	MFHAS1	.		240	0.034802	0.28983	1.9493e-19	3.80829e-13		1	0.716429	4.68361e-69	0.51327
chr8:8826248-8826277	2	GT	15	10	22,21,20,19,18,17,16,15,14,13	13	16	16	18	22	.	MFHAS1	MFHAS1	0	MFHAS1_intron		cg00128506	chr8:8783788	-42474.5	.	.	MFHAS1	.		147	0.06106	0.2758	8.5625e-12	1.67283e-05		1	0.616579	1.58599e-24	0.38017
chr8:8826248-8826277	2	GT	15	10	22,21,20,19,18,17,16,15,14,13	13	16	16	18	22	.	MFHAS1	MFHAS1	0	MFHAS1_intron		cg15867437	chr8:8782576	-43686.5	.	.	MFHAS1	.		244	0.01168	0.1898	1.0059e-12	1.9652e-06		1	0.45676	1.82995e-19	0.20863
chr8:8826248-8826277	2	GT	15	10	22,21,20,19,18,17,16,15,14,13	13	16	16	18	22	.	MFHAS1	MFHAS1	0	MFHAS1_intron		cg05986838	chr8:8786020	-40242.5	.	MFHAS1	MFHAS1	.		245	0.024223	0.19104	7.4806e-13	1.46146e-06		1	0.469734	5.4846e-21	0.22065
chr8:8826248-8826277	2	GT	15	10	22,21,20,19,18,17,16,15,14,13	13	16	16	18	22	.	MFHAS1	MFHAS1	0	MFHAS1_intron		cg19034770	chr8:8783743	-42519.5	.	.	MFHAS1	.		243	0.069984	0.35223	1.6222e-24	3.16924e-18		1	0.632092	7.7116e-48	0.39954
chr8:8824522-8824568	2	AC	25	10	27,26,25,24,23,22,21,18,17,11	11	11	11	24	27	.	MFHAS1	MFHAS1	0	MFHAS1_intron		cg05986838	chr8:8786020	-38525	.	MFHAS1	MFHAS1	.		151	-0.005617	0.24721	8.3571e-11	0.00016327		1	-0.640945	3.75166e-27	0.41081
chr8:8824522-8824568	2	AC	25	10	27,26,25,24,23,22,21,18,17,11	11	11	11	24	27	.	MFHAS1	MFHAS1	0	MFHAS1_intron		cg19034770	chr8:8783743	-40802	.	.	MFHAS1	.		151	-0.014442	0.43193	4.9664e-20	9.70271e-14		1	-0.806592	1.1107e-58	0.65059
chr8:8761147-8761180	5	ATTTT	7	3	8,7,6	6	7	7	7	8	.	.	MFHAS1	22175	.		cg17263012	chr8:8789428	28264.5	.	MFHAS1	MFHAS1	.		245	0.029011	0.17181	1.368e-11	2.67262e-05		1	0.491009	3.85188e-24	0.24109
chr8:8761147-8761180	5	ATTTT	7	3	8,7,6	6	7	7	7	8	.	.	MFHAS1	22175	.		cg15867437	chr8:8782576	21412.5	.	.	MFHAS1	.		244	0.039303	0.2004	1.9924e-13	3.89249e-07		1	0.465747	7.17173e-21	0.21692
chr8:8761147-8761180	5	ATTTT	7	3	8,7,6	6	7	7	7	8	.	.	MFHAS1	22175	.		cg20497631	chr8:8789930	28766.5	.	MFHAS1	MFHAS1	.		244	0.06949	0.21133	3.6727e-14	7.17524e-08		1	0.346482	1.22973e-08	0.12005
chr8:8761147-8761180	5	ATTTT	7	3	8,7,6	6	7	7	7	8	.	.	MFHAS1	22175	.		cg00128506	chr8:8783788	22624.5	.	.	MFHAS1	.		147	0.201589	0.33669	1.3362e-14	2.61049e-08		1	0.68884	2.03321e-35	0.4745
chr8:8749747-8749766	3	GTT	7	3	8,7,6	6	7	7	7	8	.	.	MFHAS1	33589	.		cg20497631	chr8:8789930	40173.5	.	MFHAS1	MFHAS1	.		244	-0.055843	0.15716	1.3108e-10	0.000256087		1	-0.46088	2.24148e-20	0.21241
chr8:8749747-8749766	3	GTT	7	3	8,7,6	6	7	7	7	8	.	.	MFHAS1	33589	.		cg17263012	chr8:8789428	39671.5	.	MFHAS1	MFHAS1	.		245	-0.026617	0.16661	2.9699e-11	5.8022e-05		1	-0.618789	5.57034e-46	0.3829
chr8:8749747-8749766	3	GTT	7	3	8,7,6	6	7	7	7	8	.	.	MFHAS1	33589	.		cg00128506	chr8:8783788	34031.5	.	.	MFHAS1	.		147	-0.17061	0.28437	3.56e-12	6.95507e-06		1	-0.772962	1.46355e-52	0.59747
chr8:86711817-86711879	2	CT/AT	32	5	33,32,31,30,29	29	30	30	32	33	.	CNGB3	CNGB3	0	CNGB3_intron		cg13002622	chr8:86724826	12978	.	CNGB3	CNGB3	.		245	-0.032915	0.16683	2.8716e-11	5.61016e-05		1	-0.286674	0.000434536	0.082182
chr8:86524849-86524871	4	CTTT	6	11	18,17,16,15,14,13,9,8,7,6,5	5	6	8	8	18	.	CPNE3	CPNE3	0	CPNE3_intron		cg15253520	chr8:86509140	-15719	RMDN1	RMDN1	RMDN1	CpG:_47_Shore_S		245	-0.011157	0.15536	1.5656e-10	0.000305867		0	0	0	0
chr8:86524849-86524871	4	CTTT	6	11	18,17,16,15,14,13,9,8,7,6,5	5	6	8	8	18	.	CPNE3	CPNE3	0	CPNE3_intron		cg18183698	chr8:86509148	-15711	RMDN1	RMDN1	RMDN1	CpG:_47_Shore_S		245	-0.010476	0.15867	9.6204e-11	0.000187951		0	0	0	0
chr8:86128351-86128380	4	AAAT/AAAC	8	3	9,8,7	7	8	8	8	9	.	ATP6V0D2	ATP6V0D2	0	ATP6V0D2_intron		cg18125233	chr8:86176699	48333.5	.	.	ATP6V0D2	.		243	0.117704	0.33705	2.702e-23	5.27882e-17		1	0.62558	2.58423e-47	0.39135
chr8:86104845-86104879	2	AC	18	13	28,27,26,25,24,23,22,21,20,19,18,17,16	16	18	19	24	28	.	ATP6V0D2	ATP6V0D2	0	ATP6V0D2_intron		cg15541630	chr8:86069541	-35321	PSKH2	PSKH2	PSKH2	CpG:_40_Island		245	0.008122	0.17753	5.8012e-12	1.13336e-05		1	0.352746	7.23339e-09	0.12443
chr8:86104845-86104879	2	AC	18	13	28,27,26,25,24,23,22,21,20,19,18,17,16	16	18	19	24	28	.	ATP6V0D2	ATP6V0D2	0	ATP6V0D2_intron		cg27340506	chr8:86069816	-35046	PSKH2	.	PSKH2	CpG:_40_Island		242	0.009856	0.1894	1.3244e-12	2.58744e-06		1	0.30042	6.96816e-05	0.090252
chr8:86104845-86104879	2	AC	18	13	28,27,26,25,24,23,22,21,20,19,18,17,16	16	18	19	24	28	.	ATP6V0D2	ATP6V0D2	0	ATP6V0D2_intron		cg17788832	chr8:86069425	-35437	PSKH2	PSKH2	PSKH2	CpG:_40_Island		244	0.007103	0.21638	1.6695e-14	3.26165e-08		1	0.372089	1.85904e-10	0.13845
chr8:86104845-86104879	2	AC	18	13	28,27,26,25,24,23,22,21,20,19,18,17,16	16	18	19	24	28	.	ATP6V0D2	ATP6V0D2	0	ATP6V0D2_intron		cg04470072	chr8:86069785	-35077	PSKH2	.	PSKH2	CpG:_40_Island		243	0.00622	0.25781	2.4927e-17	4.86991e-11		1	0.31975	2.86415e-06	0.10224
chr8:86104845-86104879	2	AC	18	13	28,27,26,25,24,23,22,21,20,19,18,17,16	16	18	19	24	28	.	ATP6V0D2	ATP6V0D2	0	ATP6V0D2_intron		cg00001099	chr8:86069324	-35538	PSKH2	PSKH2	PSKH2	CpG:_40_Shore_N		244	0.019258	0.28147	4.0774e-19	7.96589e-13		1	0.42332	1.76032e-15	0.1792
chr8:86104845-86104879	2	AC	18	13	28,27,26,25,24,23,22,21,20,19,18,17,16	16	18	19	24	28	.	ATP6V0D2	ATP6V0D2	0	ATP6V0D2_intron		cg26186954	chr8:86069779	-35083	PSKH2	.	PSKH2	CpG:_40_Island		234	0.014916	0.30509	4.3236e-20	8.44689e-14		1	0.456903	6.45158e-19	0.20876
chr8:86104845-86104879	2	AC	18	13	28,27,26,25,24,23,22,21,20,19,18,17,16	16	18	19	24	28	.	ATP6V0D2	ATP6V0D2	0	ATP6V0D2_intron		cg20982735	chr8:86069794	-35068	PSKH2	.	PSKH2	CpG:_40_Island		245	0.017292	0.3281	9.2263e-23	1.80251e-16		1	0.398986	5.10329e-13	0.15919
chr8:86095171-86095211	4	AAAT	10	7	13,12,11,10,9,8,7	7	9	10	10	13	.	.	ATP6V0D2	3699	.		cg20982735	chr8:86069794	-25397	PSKH2	.	PSKH2	CpG:_40_Island		245	0.057845	0.15644	1.3354e-10	0.000260893		0	0	0	0
chr8:86095171-86095211	4	AAAT	10	7	13,12,11,10,9,8,7	7	9	10	10	13	.	.	ATP6V0D2	3699	.		cg26186954	chr8:86069779	-25412	PSKH2	.	PSKH2	CpG:_40_Island		234	0.058974	0.17908	1.3892e-11	2.71404e-05		0	0	0	0
chr8:86095171-86095211	4	AAAT	10	7	13,12,11,10,9,8,7	7	9	10	10	13	.	.	ATP6V0D2	3699	.		cg00001099	chr8:86069324	-25867	PSKH2	PSKH2	PSKH2	CpG:_40_Shore_N		244	0.073115	0.17449	1.0098e-11	1.97282e-05		0	0	0	0
chr8:86088094-86088152	5	AAAAT	12	11	22,21,20,19,18,17,16,15,14,13,12	12	12	14	18	22	.	.	ATP6V0D2	10758	.		cg00001099	chr8:86069324	-18799	PSKH2	PSKH2	PSKH2	CpG:_40_Shore_N		242	0.014652	0.15415	2.4177e-10	0.000472339		0	0	0	0
chr8:86088094-86088152	5	AAAAT	12	11	22,21,20,19,18,17,16,15,14,13,12	12	12	14	18	22	.	.	ATP6V0D2	10758	.		cg04470072	chr8:86069785	-18338	PSKH2	.	PSKH2	CpG:_40_Island		242	0.005431	0.18747	1.772e-12	3.4619e-06		0	0	0	0
chr8:86088094-86088152	5	AAAAT	12	11	22,21,20,19,18,17,16,15,14,13,12	12	12	14	18	22	.	.	ATP6V0D2	10758	.		cg20982735	chr8:86069794	-18329	PSKH2	.	PSKH2	CpG:_40_Island		243	0.014223	0.21218	3.6333e-14	7.09827e-08		0	0	0	0
chr8:86088094-86088152	5	AAAAT	12	11	22,21,20,19,18,17,16,15,14,13,12	12	12	14	18	22	.	.	ATP6V0D2	10758	.		cg26186954	chr8:86069779	-18344	PSKH2	.	PSKH2	CpG:_40_Island		234	0.013489	0.23198	5.4104e-15	1.05701e-08		1	0.332956	3.70801e-07	0.11086
chr8:86055954-86056003	2	AT/GT	25	4	27,26,25,24	24	24	25	26	27	.	PSKH2	PSKH2	0	PSKH2_intron		cg00001099	chr8:86069324	13345.5	PSKH2	PSKH2	PSKH2	CpG:_40_Shore_N		244	0.055143	0.16245	6.0239e-11	0.000117687		1	0.320765	1.24167e-06	0.10289
chr8:86055954-86056003	2	AT/GT	25	4	27,26,25,24	24	24	25	26	27	.	PSKH2	PSKH2	0	PSKH2_intron		cg04470072	chr8:86069785	13806.5	PSKH2	.	PSKH2	CpG:_40_Island		243	0.019085	0.17066	1.966e-11	3.84092e-05		1	0.321636	1.12875e-06	0.10345
chr8:86055954-86056003	2	AT/GT	25	4	27,26,25,24	24	24	25	26	27	.	PSKH2	PSKH2	0	PSKH2_intron		cg20982735	chr8:86069794	13815.5	PSKH2	.	PSKH2	CpG:_40_Island		245	0.051142	0.20264	1.2576e-13	2.45694e-07		1	0.314083	3.90434e-06	0.098648
chr8:86055954-86056003	2	AT/GT	25	4	27,26,25,24	24	24	25	26	27	.	PSKH2	PSKH2	0	PSKH2_intron		cg26186954	chr8:86069779	13800.5	PSKH2	.	PSKH2	CpG:_40_Island		234	0.047587	0.22005	3.3168e-14	6.47993e-08		1	0.397492	4.61099e-13	0.158
chr8:85415150-85415195	4	AAAC	12	3	13,12,11	11	12	12	12	13	.	.	CA3	23664	.		cg22927247	chr8:85438966	23793.5	CA3	CA3	CA3	CpG:_33_Island		231	-0.067147	0.20467	4.6969e-13	9.17619e-07		1	-0.504718	8.92855e-26	0.25474
chr8:8529296-8529322	4	AAAT	7	3	9,8,7	7	7	8	8	9	.	.	PRAG1	142858	.		cg14469574	chr8:8508279	-21030	.	.	SGK223	.		223	-0.085874	0.23188	2.4015e-14	4.69174e-08		0	0	0	0
chr8:8529296-8529322	4	AAAT	7	3	9,8,7	7	7	8	8	9	.	.	PRAG1	142858	.		cg16423305	chr8:8520455	-8854	.	.	SGK223	.		213	-0.168996	0.41465	2.453e-26	4.79235e-20		0	0	0	0
chr8:8523793-8523887	4	AGAT	24	12	28,27,26,25,24,23,22,21,20,19,18,17	17	22	23	24	28	.	.	PRAG1	137355	.		cg16423305	chr8:8520455	-3385	.	.	SGK223	.		225	-0.024272	0.1741	6.8456e-11	0.00013374		1	-0.476256	5.1393e-21	0.22682
chr8:8523793-8523887	4	AGAT	24	12	28,27,26,25,24,23,22,21,20,19,18,17	17	22	23	24	28	.	.	PRAG1	137355	.		cg14469574	chr8:8508279	-15561	.	.	SGK223	.		244	-0.020414	0.25704	2.4337e-17	4.75465e-11		1	-0.448676	1.29693e-18	0.20131
chr8:837657-837724	2	GT/AT	34	3	36,35,34	34	34	34	35	36	.	DLGAP2	DLGAP2	0	DLGAP2_intron		cg07178994	chr8:866998	29307.5	.	ERICH1-AS1	ERICH1-AS1	.		245	0.107255	0.2281	2.3042e-15	4.50165e-09		1	0.385136	5.05043e-12	0.14833
chr8:8268074-8268113	2	GT	20	11	24,23,22,21,20,19,18,17,16,15,14	14	15	20	20	24	.	.	FAM86B3P	23210	.		cg06636001	chr8:8227981	-40112.5	FAM86B3P	.	FAM86B3P	CpG:_119_Island		155	-0.004671	0.22411	4.9467e-10	0.000966422		1	-0.528763	3.90591e-29	0.27959
chr8:8268074-8268113	2	GT	20	11	24,23,22,21,20,19,18,17,16,15,14	14	15	20	20	24	.	.	FAM86B3P	23210	.		cg15556689	chr8:8228322	-39771.5	FAM86B3P	.	FAM86B3P	CpG:_119_Island		242	-0.010576	0.16708	3.6619e-11	7.15414e-05		1	-0.522159	3.77613e-28	0.27265
chr8:8268074-8268113	2	GT	20	11	24,23,22,21,20,19,18,17,16,15,14	14	15	20	20	24	.	.	FAM86B3P	23210	.		cg26468374	chr8:8228589	-39504.5	FAM86B3P	FAM86B3P	FAM86B3P	CpG:_119_Island		234	-0.00537	0.20948	1.6201e-13	3.16514e-07		1	-0.565111	5.71519e-35	0.31935
chr8:8268074-8268113	2	GT	20	11	24,23,22,21,20,19,18,17,16,15,14	14	15	20	20	24	.	.	FAM86B3P	23210	.		cg15462221	chr8:8228622	-39471.5	FAM86B3P	FAM86B3P	FAM86B3P	CpG:_119_Island		182	-0.013309	0.27697	2.3464e-14	4.58409e-08		1	-0.533029	8.77176e-30	0.28412
chr8:8268074-8268113	2	GT	20	11	24,23,22,21,20,19,18,17,16,15,14	14	15	20	20	24	.	.	FAM86B3P	23210	.		cg14343924	chr8:8228624	-39469.5	FAM86B3P	FAM86B3P	FAM86B3P	CpG:_119_Island		182	-0.016553	0.30278	8.5277e-16	1.66603e-09		1	-0.555383	2.44897e-33	0.30845
chr8:8268074-8268113	2	GT	20	11	24,23,22,21,20,19,18,17,16,15,14	14	15	20	20	24	.	.	FAM86B3P	23210	.		cg16837680	chr8:8227452	-40641.5	FAM86B3P	.	FAM86B3P	CpG:_119_Shore_N		174	-0.024964	0.36761	7.6099e-19	1.48672e-12		1	-0.622519	8.31078e-46	0.38753
chr8:82447314-82447366	2	AT	30	19	35,34,33,32,31,30,29,28,27,26,25,24,23,22,21,20,19,18,12	12	20	27	30	35	.	.	LOC101927141	464738	.		cg25434864	chr8:82441518	-5822	.	.	LOC101927141	.		219	-0.011354	0.17805	7.2433e-11	0.00014151		0	0	0	0
chr8:82437761-82437794	5	GTTTT	8	3	9,8,7	7	7	7.5	8	9	.	.	LOC101927141	474310	.		cg25434864	chr8:82441518	3740.5	.	.	LOC101927141	.		239	-0.199452	0.4588	1.9222e-33	3.75534e-27		1	-0.647372	1.41119e-49	0.41909
chr8:823311-823340	3	ATT	10	4	11,10,9,8	8	9	9	9	11	.	DLGAP2	DLGAP2	0	DLGAP2_intron		cg01143440	chr8:823114	-211.5	.	ERICH1-AS1	ERICH1-AS1	.		245	0.046889	0.1946	4.3393e-13	8.47756e-07		1	0.450033	2.51592e-18	0.20253
chr8:823311-823340	3	ATT	10	4	11,10,9,8	8	9	9	9	11	.	DLGAP2	DLGAP2	0	DLGAP2_intron		cg07178994	chr8:866998	43672.5	.	ERICH1-AS1	ERICH1-AS1	.		245	0.178674	0.30465	6.1713e-21	1.20567e-14		1	0.609623	1.8091e-42	0.37164
chr8:81862954-81862976	2	GT	12	7	17,16,15,14,13,12,11	11	12	12	15	17	.	.	SNX16	20669	.		cg17211192	chr8:81842240	-20725	SNX16	SNX16	SNX16	CpG:_44_Island		182	0.008469	0.2	2.4674e-10	0.000482049		1	0.550264	5.67956e-33	0.30279
chr8:81796366-81796415	2	AC	25	15	27,26,25,24,23,22,21,20,19,18,17,16,15,14,12	12	14	20	23	27	.	.	SNX16	3168	.		cg27398817	chr8:81842262	45871.5	SNX16	SNX16	SNX16	CpG:_44_Shore_S		182	0.004347	0.20702	1.0985e-10	0.000214611		1	0.509402	1.95041e-26	0.25949
chr8:81693484-81693524	2	GT/AT	21	8	25,24,23,22,21,20,19,18	18	22	22	23	25	SLC10A5	.	SLC10A5	107	.		cg07162097	chr8:81721855	28351	ZFAND1	.	ZFAND1	CpG:_53_Shore_S		245	0.021799	0.15085	3.0309e-10	0.000592138		0	0	0	0
chr8:81688665-81688693	4	AAAG	7	7	12,11,10,9,8,7,6	6	7	7	7	12	.	.	IMPA1	2312	.		cg00450487	chr8:81720974	32295	ZFAND1	ZFAND1	ZFAND1	CpG:_53_Island		245	0.027977	0.17552	7.8432e-12	1.5323e-05		1	0.544206	5.4801e-32	0.29616
chr8:81625021-81625039	2	AC	12	6	21,20,19,18,13,12	12	12	12	12	21	.	IMPA1P1	IMPA1P1	0	IMPA1P1_intron		cg18380562	chr8:81643934	18904	.	.	IMPA1	.		240	-0.004422	0.16921	3.2374e-11	6.32481e-05		1	-0.347088	1.51736e-08	0.12047
chr8:81377203-81377224	2	AC	11	4	14,13,12,11	11	11	12	12	14	.	.	PMP2	63104	.		cg03741590	chr8:81369695	-7518.5	.	.	PMP2	.		245	-0.04779	0.18094	3.4691e-12	6.77748e-06		1	-0.532607	4.39273e-30	0.28367
chr8:80925516-80925538	4	ACGC	6	3	7,6,5	5	6	7	7	7	.	.	PAG1	42273	.		cg08595989	chr8:80915477	-10050	.	.	ZNF704	.		241	-0.17655	0.40172	1.7686e-28	3.45526e-22		1	-0.722246	4.12593e-72	0.52164
chr8:80892145-80892169	2	AC	13	6	14,13,12,11,10,9	9	9	11	13	14	.	.	ZNF704	17365	.		cg08595989	chr8:80915477	23320	.	.	ZNF704	.		241	0.04115	0.29735	4.5403e-20	8.87025e-14		1	0.580129	8.871e-38	0.33655
chr8:80878254-80878312	4	AAGG	15	10	18,17,16,15,14,13,12,11,10,9	9	12	14	15	18	.	.	ZNF704	3474	.		cg08595989	chr8:80915477	37194	.	.	ZNF704	.		240	0.034363	0.15805	1.6362e-10	0.000319659		1	0.426063	8.14811e-16	0.18153
chr8:80148318-80148345	2	GT	15	12	26,25,24,23,22,21,20,19,18,17,16,15	15	15	18	20	26	.	TPD52	TPD52	0	TPD52_intron		cg04714581	chr8:80134805	-13526.5	.	TPD52	TPD52	.		244	-0.011606	0.16796	2.6653e-11	5.20712e-05		1	-0.518344	2.20253e-27	0.26868
chr8:79670339-79670401	2	CT/AC	32	8	37,36,35,34,33,32,31,30	30	31	32	34	37	.	.	STMN2	4182	.		cg21171155	chr8:79684582	14212	.	.	STMN2	.		245	-0.019918	0.19232	6.1551e-13	1.2025e-06		1	-0.362229	6.99106e-10	0.13121
chr8:79670339-79670401	2	CT/AC	32	8	37,36,35,34,33,32,31,30	30	31	32	34	37	.	.	STMN2	4182	.		cg22956084	chr8:79685254	14884	.	.	STMN2	.		245	-0.007684	0.21532	1.7419e-14	3.4031e-08		1	-0.358357	1.5065e-09	0.12842
chr8:78686432-78686464	4	ATTT	8	4	10,9,8,7	7	7	7	8	10	.	ZC2HC1A	ZC2HC1A	0	ZC2HC1A_intron		cg07654569	chr8:78665561	-20887	ZC2HC1A	.	ZC2HC1A	CpG:_53_Shore_N		243	0.084685	0.37762	1.2671e-26	2.4755e-20		1	0.565791	9.2576e-36	0.32012
chr8:78686432-78686464	4	ATTT	8	4	10,9,8,7	7	7	7	8	10	.	ZC2HC1A	ZC2HC1A	0	ZC2HC1A_intron		cg21140145	chr8:78665406	-21042	ZC2HC1A	.	ZC2HC1A	CpG:_53_Shore_N		243	0.192068	0.61349	1.172e-51	2.2897e-45		1	0.738898	7.16977e-78	0.54597
chr8:78686432-78686464	4	ATTT	8	4	10,9,8,7	7	7	7	8	10	.	ZC2HC1A	ZC2HC1A	0	ZC2HC1A_intron		cg03983883	chr8:78665383	-21065	ZC2HC1A	.	ZC2HC1A	CpG:_53_Shore_N		244	0.255955	0.61855	1.4665e-52	2.86506e-46		1	0.738471	6.73678e-78	0.54534
chr8:78235562-78235592	2	AC	16	5	17,16,15,14,13	13	15	16	16	17	.	.	PKIA	280748	.		cg14238973	chr8:78232231	-3346	.	.	PKIA	.		245	-0.097572	0.33298	3.7772e-23	7.3794e-17		1	-0.583147	2.04104e-38	0.34006
chr8:78079012-78079023	2	AT	9	3	11,10,9	9	9	9	10	11	.	.	PKIA	437317	.		cg00738934	chr8:78084044	5026.5	.	.	PKIA	.		233	0.130371	0.36943	6.342e-25	1.23902e-18		1	0.719535	9.00743e-68	0.51773
chr8:78070219-78070287	4	AAAG	17	10	21,20,19,18,17,16,15,14,13,10	10	16	17	18	21	.	.	PKIA	446053	.		cg00738934	chr8:78084044	13791	.	.	PKIA	.		231	0.02712	0.15783	3.7272e-10	0.000728172		1	0.30531	0.000215301	0.093214
chr8:78051932-78052057	3	ATT	42	3	44,43,42	42	43	43	44	44	.	.	PKIA	464283	.		cg00738934	chr8:78084044	32049.5	.	.	PKIA	.		245	0.096368	0.23901	3.996e-16	7.80687e-10		1	0.577408	1.1372e-36	0.3334
chr8:77646710-77646742	2	AC/AT	19	7	24,23,22,21,20,19,18	18	19	20	21	24	.	.	LOC102724874	170380	.		cg14433904	chr8:77606192	-40534	.	.	LOC102724874	.		245	-0.041431	0.22032	7.922e-15	1.5477e-08		1	-0.585483	3.28207e-39	0.34279
chr8:77608421-77608453	4	ATCT	8	3	9,8,7	7	7	7	8	9	.	.	LOC102724874	132091	.		cg14433904	chr8:77606192	-2245	.	.	LOC102724874	.		245	0.117788	0.45497	7.1273e-34	1.39244e-27		1	0.710444	3.37681e-68	0.50473
chr8:77040086-77040116	2	GT	16	9	23,22,21,20,19,18,17,16,15	15	16	20	21	23	.	.	PEX2	39043	.		cg00451054	chr8:77001085	-39016	PEX2	.	PEX2	CpG:_78_Shore_S		245	-0.009454	0.18266	2.6753e-12	5.22665e-06		1	-0.422078	1.18818e-15	0.17815
chr8:77040086-77040116	2	GT	16	9	23,22,21,20,19,18,17,16,15	15	16	20	21	23	.	.	PEX2	39043	.		cg22944540	chr8:77001105	-38996	PEX2	.	PEX2	CpG:_78_Shore_S		241	-0.019169	0.26631	8.3813e-18	1.63743e-11		1	-0.434223	5.68269e-17	0.18855
chr8:77040086-77040116	2	GT	16	9	23,22,21,20,19,18,17,16,15	15	16	20	21	23	.	.	PEX2	39043	.		cg05205432	chr8:77001050	-39051	PEX2	.	PEX2	CpG:_78_Shore_S		244	-0.032169	0.38971	9.1487e-28	1.78735e-21		1	-0.589847	2.24677e-39	0.34792
chr8:77040086-77040116	2	GT	16	9	23,22,21,20,19,18,17,16,15	15	16	20	21	23	.	.	PEX2	39043	.		cg21856807	chr8:77001058	-39043	PEX2	.	PEX2	CpG:_78_Shore_S		244	-0.037866	0.43801	4.0185e-32	7.85082e-26		1	-0.618256	8.08234e-45	0.38224
chr8:77035715-77035735	2	AT	11	17	29,28,27,26,25,24,23,22,21,20,19,18,17,16,15,13,11	11	17	19	19	29	.	.	PEX2	34672	.		cg21856807	chr8:77001058	-34667	PEX2	.	PEX2	CpG:_78_Shore_S		241	-0.021102	0.16321	7.0765e-11	0.000138251		0	0	0	0
chr8:77035715-77035735	2	AT	11	17	29,28,27,26,25,24,23,22,21,20,19,18,17,16,15,13,11	11	17	19	19	29	.	.	PEX2	34672	.		cg05205432	chr8:77001050	-34675	PEX2	.	PEX2	CpG:_78_Shore_S		241	-0.019079	0.16369	6.5987e-11	0.000128917		0	0	0	0
chr8:77026593-77026670	2	AG	40	19	46,45,44,43,42,41,40,39,38,37,36,35,34,33,32,31,30,29,28	28	33	34	37	46	.	.	PEX2	25550	.		cg22944540	chr8:77001105	-25526.5	PEX2	.	PEX2	CpG:_78_Shore_S		239	-0.009952	0.21643	3.0774e-14	6.01222e-08		1	-0.391918	4.99328e-10	0.1536
chr8:77026593-77026670	2	AG	40	19	46,45,44,43,42,41,40,39,38,37,36,35,34,33,32,31,30,29,28	28	33	34	37	46	.	.	PEX2	25550	.		cg05205432	chr8:77001050	-25581.5	PEX2	.	PEX2	CpG:_78_Shore_S		242	-0.014146	0.23858	6.4872e-16	1.26738e-09		1	-0.479041	3.22276e-18	0.22948
chr8:77026593-77026670	2	AG	40	19	46,45,44,43,42,41,40,39,38,37,36,35,34,33,32,31,30,29,28	28	33	34	37	46	.	.	PEX2	25550	.		cg21856807	chr8:77001058	-25573.5	PEX2	.	PEX2	CpG:_78_Shore_S		242	-0.016912	0.27768	1.0781e-18	2.10625e-12		1	-0.503329	6.49151e-21	0.25334
chr8:77012351-77012391	4	ATTT	10	4	11,10,9,8	8	9	10	10	11	.	.	PEX2	11308	.		cg22944540	chr8:77001105	-11266	PEX2	.	PEX2	CpG:_78_Shore_S		241	-0.085267	0.28125	6.9901e-19	1.36563e-12		1	-0.474226	7.93514e-22	0.22489
chr8:77012351-77012391	4	ATTT	10	4	11,10,9,8	8	9	10	10	11	.	.	PEX2	11308	.		cg05205432	chr8:77001050	-11321	PEX2	.	PEX2	CpG:_78_Shore_S		244	-0.129953	0.34479	5.2417e-24	1.02406e-17		1	-0.61371	3.32807e-44	0.37664
chr8:77012351-77012391	4	ATTT	10	4	11,10,9,8	8	9	10	10	11	.	.	PEX2	11308	.		cg21856807	chr8:77001058	-11313	PEX2	.	PEX2	CpG:_78_Shore_S		244	-0.151541	0.38033	5.8637e-27	1.14557e-20		1	-0.624163	2.9403e-46	0.38958
chr8:75425063-75425103	4	ATTT	10	7	14,13,12,11,10,9,8	8	10	12	12	14	.	HNF4G	HNF4G	0	HNF4G_intron		cg18894440	chr8:75408998	-16085	.	.	CASC9	CpG:_69_Shore_S		243	-0.025803	0.17368	1.256e-11	2.45381e-05		0	0	0	0
chr8:73996318-73996440	4	CCTT/CTTT	31	17	34,33,32,31,30,29,28,27,26,24,23,22,21,20,19,18,17	17	20	30	34	34	.	LY96	LY96	0	LY96_intron		cg17586533	chr8:73975764	-20615	TMEM70	.	TMEM70	CpG:_64_Shore_N		242	0.012258	0.18074	4.8513e-12	9.47784e-06		0	0	0	0
chr8:73992837-73992876	2	GT	20	17	28,27,26,25,24,23,22,21,20,19,18,17,16,14,12,11,10	10	16	20	20	28	.	LY96	LY96	0	LY96_intron		cg23732024	chr8:73991566	-1290.5	LY96	LY96	LY96	.		243	-0.014125	0.17089	1.8998e-11	3.71158e-05		1	-0.501059	3.33551e-25	0.25106
chr8:73992837-73992876	2	GT	20	17	28,27,26,25,24,23,22,21,20,19,18,17,16,14,12,11,10	10	16	20	20	28	.	LY96	LY96	0	LY96_intron		cg02266544	chr8:73992300	-556.5	LY96	LY96	LY96	.		243	-0.026718	0.26167	1.3208e-17	2.58041e-11		1	-0.605161	2.68974e-42	0.36622
chr8:73881454-73881552	2	AT	50	7	53,52,51,50,49,45,44	44	50	50	50	53	.	LINC01617	LINC01617	0	LINC01617_intron		cg12682382	chr8:73875683	-5820	.	UBE2W	UBE2W	CpG:_109_Shelf_N		239	-0.100837	0.71311	3.3628e-66	6.5698e-60		1	-0.889713	2.7653e-159	0.79159
chr8:738675-738711	5	CTGGG	7	5	9,8,7,6,4	4	7	8	8	9	.	DLGAP2,LOC401442	DLGAP2,LOC401442	0	DLGAP2_intron,LOC401442_5utr		cg19002941	chr8:691497	-47196	.	ERICH1	ERICH1	CpG:_85_Shelf_S		244	-0.050531	0.18971	1.0198e-12	1.99235e-06		0	0	0	0
chr8:73858880-73858909	2	GT	15	5	17,16,15,14,13	13	14	14	14	17	.	UBE2W	UBE2W	0	UBE2W_intron		cg12682382	chr8:73875683	16788.5	.	UBE2W	UBE2W	CpG:_109_Shelf_N		228	0.176762	0.2049	6.4445e-13	1.25904e-06		1	0.639672	8.22191e-49	0.40918
chr8:73832137-73832152	2	AT	9	3	12,10,9	9	9	9	9	12	.	UBE2W	UBE2W	0	UBE2W_intron		cg12682382	chr8:73875683	43538.5	.	UBE2W	UBE2W	CpG:_109_Shelf_N		230	0.461555	0.69017	6.1678e-60	1.20498e-53		1	0.89738	8.13108e-163	0.80529
chr8:73675371-73675403	2	AC	17	10	24,23,22,21,20,19,18,17,16,15	15	18	18	19	24	.	STAU2	STAU2	0	STAU2_intron		cg06069019	chr8:73702812	27425	.	STAU2	STAU2	.		244	-0.008529	0.22337	5.5552e-15	1.0853e-08		1	-0.540851	7.58612e-31	0.29252
chr8:73669638-73669671	2	CT	17	10	24,22,21,20,19,18,17,16,15,14	14	16	16	18	24	.	STAU2	STAU2	0	STAU2_intron		cg06069019	chr8:73702812	33157.5	.	STAU2	STAU2	.		245	-0.005534	0.14895	3.9999e-10	0.000781448		1	-0.362808	5.39084e-10	0.13163
chr8:735311-735365	3	AAT	20	6	20,19,18,17,16,15	15	18	18	19	20	.	.	DLGAP2	2263	.		cg18002480	chr8:722007	-13331	.	ERICH1	ERICH1	.		244	-0.094296	0.17126	1.6343e-11	3.19288e-05		1	-0.543709	2.2636e-31	0.29562
chr8:735311-735365	3	AAT	20	6	20,19,18,17,16,15	15	18	18	19	20	.	.	DLGAP2	2263	.		cg26684319	chr8:722406	-12932	.	ERICH1	ERICH1	.		232	-0.055913	0.23198	7.0701e-15	1.38126e-08		1	-0.628673	4.1915e-47	0.39523
chr8:735311-735365	3	AAT	20	6	20,19,18,17,16,15	15	18	18	19	20	.	.	DLGAP2	2263	.		cg21650737	chr8:724525	-10813	.	ERICH1	ERICH1	.		245	-0.091114	0.22566	3.3965e-15	6.63564e-09		1	-0.535126	5.87002e-30	0.28636
chr8:735311-735365	3	AAT	20	6	20,19,18,17,16,15	15	18	18	19	20	.	.	DLGAP2	2263	.		cg17179911	chr8:724434	-10904	.	ERICH1	ERICH1	.		242	-0.091455	0.24431	2.5918e-16	5.06352e-10		1	-0.564526	1.55064e-34	0.31869
chr8:735311-735365	3	AAT	20	6	20,19,18,17,16,15	15	18	18	19	20	.	.	DLGAP2	2263	.		cg07874755	chr8:753701	18363	.	ERICH1-AS1	ERICH1-AS1	.		245	-0.101302	0.30089	1.197e-20	2.33854e-14		1	-0.531771	1.36425e-29	0.28278
chr8:73436565-73436603	4	ATTT	10	7	15,14,13,12,11,10,9	9	11	13	13	15	.	STAU2,STAU2-AS1	STAU2-AS1,STAU2	0	STAU2-AS1_intron,STAU2_intron		cg05293319	chr8:73438336	1752	.	STAU2,STAU2-AS1	STAU2	.		242	0.014142	0.16291	6.7464e-11	0.000131802		1	0.368293	1.76866e-10	0.13564
chr8:733527-733597	2	AC/AG	36	12	43,41,40,39,38,37,36,35,34,33,32,31	31	35	35	37	43	.	.	ERICH1	2304	.		cg00395995	chr8:724959	-8603	.	ERICH1	ERICH1	.		245	-0.005703	0.15477	1.7062e-10	0.000333335		1	-0.445601	1.96568e-17	0.19856
chr8:733527-733597	2	AC/AG	36	12	43,41,40,39,38,37,36,35,34,33,32,31	31	35	35	37	43	.	.	ERICH1	2304	.		cg14755254	chr8:687813	-45749	.	ERICH1	ERICH1	CpG:_85_Island		244	-0.067441	0.15557	1.6544e-10	0.000323215		1	-0.4032	4.43716e-13	0.16257
chr8:733527-733597	2	AC/AG	36	12	43,41,40,39,38,37,36,35,34,33,32,31	31	35	35	37	43	.	.	ERICH1	2304	.		cg07874755	chr8:753701	20139	.	ERICH1-AS1	ERICH1-AS1	.		245	-0.030648	0.24992	6.765e-17	1.32166e-10		1	-0.435259	2.37929e-16	0.18945
chr8:733527-733597	2	AC/AG	36	12	43,41,40,39,38,37,36,35,34,33,32,31	31	35	35	37	43	.	.	ERICH1	2304	.		cg26684319	chr8:722406	-11156	.	ERICH1	ERICH1	.		232	-0.021665	0.30896	3.2672e-20	6.38303e-14		1	-0.600641	4.73372e-40	0.36077
chr8:733527-733597	2	AC/AG	36	12	43,41,40,39,38,37,36,35,34,33,32,31	31	35	35	37	43	.	.	ERICH1	2304	.		cg22307444	chr8:722057	-11505	.	ERICH1	ERICH1	.		243	-0.046839	0.32065	5.2572e-22	1.02708e-15		1	-0.563924	2.39788e-33	0.31801
chr8:733527-733597	2	AC/AG	36	12	43,41,40,39,38,37,36,35,34,33,32,31	31	35	35	37	43	.	.	ERICH1	2304	.		cg18002480	chr8:722007	-11555	.	ERICH1	ERICH1	.		244	-0.043324	0.32864	1.0211e-22	1.99489e-16		1	-0.649438	4.89775e-50	0.42177
chr8:733527-733597	2	AC/AG	36	12	43,41,40,39,38,37,36,35,34,33,32,31	31	35	35	37	43	.	.	ERICH1	2304	.		cg17179911	chr8:724434	-9128	.	ERICH1	ERICH1	.		242	-0.036199	0.35133	2.3869e-24	4.66321e-18		1	-0.598456	2.95419e-39	0.35815
chr8:733527-733597	2	AC/AG	36	12	43,41,40,39,38,37,36,35,34,33,32,31	31	35	35	37	43	.	.	ERICH1	2304	.		cg21650737	chr8:724525	-9037	.	ERICH1	ERICH1	.		245	-0.039474	0.38435	2.0758e-27	4.05543e-21		1	-0.598682	1.71894e-39	0.35842
chr8:72928670-72928714	2	AC	23	8	27,24,23,22,21,20,19,18	18	20	22	23	27	.	KCNB2	KCNB2	0	KCNB2_intron		cg24726538	chr8:72929282	590	.	KCNB2	KCNB2	.		245	0.022582	0.15698	1.2341e-10	0.000241102		1	0.391395	9.1284e-13	0.15319
chr8:72227353-72227411	2	GT/AG	30	6	32,31,30,29,28,27	27	28	29	30	32	.	LOC392232	LOC392232	0	LOC392232_intron		cg24367294	chr8:72195053	-32329	.	.	LOC392232	.		225	0.02643	0.27163	4.5418e-17	8.87318e-11		1	0.593591	8.46933e-38	0.35235
chr8:72199916-72199982	2	GT/AG	35	17	44,43,42,41,40,39,38,37,36,35,34,33,32,31,30,29,28	28	31	34	35	44	.	.	LOC392232	2770	.		cg24367294	chr8:72195053	-4896	.	.	LOC392232	.		236	0.008629	0.32639	7.5889e-22	1.48262e-15		1	0.586541	1.0014e-35	0.34403
chr8:72197714-72197798	5	AACAT	17	11	24,23,22,21,20,19,18,17,16,15,14	14	17	18	20	24	.	.	LOC392232	4954	.		cg24367294	chr8:72195053	-2703	.	.	LOC392232	.		237	-0.012851	0.3529	5.3476e-24	1.04474e-17		1	-0.619831	2.40708e-43	0.38419
chr8:72182003-72182056	4	AGAT	14	8	21,20,19,18,17,16,15,14	14	16	16	17	21	.	.	LOC392232	20696	.		cg24367294	chr8:72195053	13023.5	.	.	LOC392232	.		237	-0.020017	0.29623	1.1203e-19	2.1887e-13		1	-0.511449	2.4617e-25	0.26158
chr8:72176775-72176821	2	AC/AT	26	9	35,34,33,32,31,29,28,27,26	26	26	27	33	35	.	.	LOC392232	25931	.		cg24367294	chr8:72195053	18255	.	.	LOC392232	.		237	-0.010198	0.5297	2.2704e-40	4.43561e-34		1	-0.764958	5.90741e-81	0.58516
chr8:72166157-72166179	3	ATT	8	5	13,12,10,9,8	8	8	9	9	13	.	.	LOC392232	36573	.		cg24367294	chr8:72195053	28885	.	.	LOC392232	.		237	-0.019725	0.15853	1.9879e-10	0.00038837		1	-0.403832	3.21923e-13	0.16308
chr8:72155613-72155710	2	AC/AG	52	15	59,58,57,56,55,54,53,52,51,50,49,48,47,46,44	44	49	51	55	59	.	.	LOC392232	47042	.		cg24367294	chr8:72195053	39391.5	.	.	LOC392232	.		237	-0.007594	0.3161	3.7483e-21	7.32294e-15		1	-0.629349	1.27793e-43	0.39608
chr8:71841214-71841245	2	GT	16	5	19,18,17,16,12	12	16	16	17	19	MSC-AS1	.	MSC	297	.		cg24142603	chr8:71841653	423.5	MSC-AS1	MSC	MSC	CpG:_74_Island		244	-0.028962	0.16267	5.8298e-11	0.000113895		1	-0.354542	2.59637e-09	0.1257
chr8:71841214-71841245	2	GT	16	5	19,18,17,16,12	12	16	16	17	19	MSC-AS1	.	MSC	297	.		cg10430243	chr8:71840653	-576.5	.	.	MSC	CpG:_74_Shore_N		244	0.066682	0.26977	2.9373e-18	5.73851e-12		1	0.483642	4.21812e-23	0.23391
chr8:7094365-7094383	2	AG	10	3	12,11,10	10	10	10	11	12	.	.	DEFA5	37627	.		cg18055051	chr8:7093678	-696	.	.	DEFA5	CpG:_73_Shore_S		243	0.046077	0.26932	3.7111e-18	7.25026e-12		1	0.602271	1.23788e-41	0.36273
chr8:70842548-70842578	2	AC	16	11	22,21,20,19,18,17,16,15,14,13,10	10	15	16	20	22	.	.	XKR9	106607	.		cg11510499	chr8:70805305	-37258	.	.	XKR9	.		244	0.011598	0.19228	6.8994e-13	1.34792e-06		0	0	0	0
chr8:70757549-70757606	4	ATGT/ATTT	15	7	18,17,16,15,14,13,12	12	12	15	15	18	.	.	XKR9	21608	.		cg11510499	chr8:70805305	47727.5	.	.	XKR9	.		245	-0.015166	0.1909	7.6471e-13	1.49399e-06		0	0	0	0
chr8:69834736-69834780	2	AC	28	16	35,34,33,32,31,30,29,28,27,26,25,24,23,22,20,19	19	20	30	32	35	SLCO5A1	SLCO5A1	SLCO5A1	0	SLCO5A1_intron		cg03719092	chr8:69832646	-2112	SLCO5A1	SLCO5A1	SLCO5A1	CpG:_235_Island		245	0.005041	0.2498	6.8948e-17	1.34702e-10		1	0.476844	3.0599e-20	0.22738
chr8:69722777-69722807	2	GT	16	12	24,23,22,21,20,19,18,17,16,15,14,13	13	16	18	19	24	.	SLCO5A1	SLCO5A1	0	SLCO5A1_intron		cg20211463	chr8:69711385	-11407	.	SLCO5A1	SLCO5A1	.		225	-0.010981	0.15945	5.0718e-10	0.000990862		1	-0.28748	0.000714296	0.082645
chr8:69722777-69722807	2	GT	16	12	24,23,22,21,20,19,18,17,16,15,14,13	13	16	18	19	24	.	SLCO5A1	SLCO5A1	0	SLCO5A1_intron		cg01989508	chr8:69711589	-11203	.	SLCO5A1	SLCO5A1	.		219	-0.042242	0.18741	2.039e-11	3.98353e-05		1	-0.394208	6.86304e-12	0.1554
chr8:6912532-6912583	5	GTTTT	11	4	12,11,10,9	9	9	9	10	12	.	.	DEFA6	12114	.		cg06059003	chr8:6901266	-11291.5	.	.	DEFB1	.		242	-0.078902	0.27914	8.4417e-19	1.64923e-12		1	-0.506379	3.33825e-26	0.25642
chr8:6902910-6902932	2	GT	12	9	18,17,16,15,14,13,12,9,8	8	8	8	12	18	.	.	DEFA6	21765	.		cg06059003	chr8:6901266	-1655	.	.	DEFB1	.		242	-0.022152	0.25832	2.6694e-17	5.21513e-11		1	-0.509362	1.46265e-26	0.25945
chr8:686765-686782	2	AG	11	3	13,12,11	11	11	11	12	13	.	ERICH1	ERICH1	0	ERICH1_intron		cg09221709	chr8:672011	-14762.5	.	ERICH1	ERICH1	CpG:_28_Shore_N		245	-0.039059	0.15936	8.6814e-11	0.000169606		0	0	0	0
chr8:686765-686782	2	AG	11	3	13,12,11	11	11	11	12	13	.	ERICH1	ERICH1	0	ERICH1_intron		cg17179911	chr8:724434	37660.5	.	ERICH1	ERICH1	.		242	0.124221	0.16268	6.9834e-11	0.000136433		0	0	0	0
chr8:686765-686782	2	AG	11	3	13,12,11	11	11	11	12	13	.	ERICH1	ERICH1	0	ERICH1_intron		cg21650737	chr8:724525	37751.5	.	ERICH1	ERICH1	.		245	0.140823	0.19994	1.9081e-13	3.7278e-07		0	0	0	0
chr8:686765-686782	2	AG	11	3	13,12,11	11	11	11	12	13	.	ERICH1	ERICH1	0	ERICH1_intron		cg19660806	chr8:638740	-48033.5	.	ERICH1	ERICH1	.		245	-0.087594	0.20382	1.0474e-13	2.04627e-07		0	0	0	0
chr8:686765-686782	2	AG	11	3	13,12,11	11	11	11	12	13	.	ERICH1	ERICH1	0	ERICH1_intron		cg18332212	chr8:705208	18434.5	.	ERICH1	ERICH1	CpG:_32_Shelf_S		244	0.053872	0.21054	4.1552e-14	8.11789e-08		0	0	0	0
chr8:686765-686782	2	AG	11	3	13,12,11	11	11	11	12	13	.	ERICH1	ERICH1	0	ERICH1_intron		cg12992745	chr8:677358	-9415.5	.	ERICH1	ERICH1	CpG:_248_Shore_S		245	-0.032519	0.23016	1.6587e-15	3.24055e-09		0	0	0	0
chr8:686765-686782	2	AG	11	3	13,12,11	11	11	11	12	13	.	ERICH1	ERICH1	0	ERICH1_intron		cg08454824	chr8:687468	694.5	.	ERICH1	ERICH1	CpG:_85_Island		245	0.142693	0.24447	1.6488e-16	3.22121e-10		0	0	0	0
chr8:686765-686782	2	AG	11	3	13,12,11	11	11	11	12	13	.	ERICH1	ERICH1	0	ERICH1_intron		cg20780944	chr8:677132	-9641.5	.	ERICH1	ERICH1	CpG:_248_Shore_S		245	-0.091939	0.30178	1.0226e-20	1.99782e-14		0	0	0	0
chr8:686765-686782	2	AG	11	3	13,12,11	11	11	11	12	13	.	ERICH1	ERICH1	0	ERICH1_intron		cg22307444	chr8:722057	35283.5	.	ERICH1	ERICH1	.		243	0.231937	0.3196	6.3426e-22	1.23913e-15		0	0	0	0
chr8:686765-686782	2	AG	11	3	13,12,11	11	11	11	12	13	.	ERICH1	ERICH1	0	ERICH1_intron		cg18002480	chr8:722007	35233.5	.	ERICH1	ERICH1	.		244	0.213612	0.32542	1.8311e-22	3.57737e-16		0	0	0	0
chr8:686765-686782	2	AG	11	3	13,12,11	11	11	11	12	13	.	ERICH1	ERICH1	0	ERICH1_intron		cg12641240	chr8:688330	1556.5	.	ERICH1	ERICH1	CpG:_85_Shore_S		234	0.24628	0.44624	1.3096e-31	2.55853e-25		0	0	0	0
chr8:686765-686782	2	AG	11	3	13,12,11	11	11	11	12	13	.	ERICH1	ERICH1	0	ERICH1_intron		cg14755254	chr8:687813	1039.5	.	ERICH1	ERICH1	CpG:_85_Island		244	0.655917	0.60154	2.9218e-50	5.70823e-44		0	0	0	0
chr8:686765-686782	2	AG	11	3	13,12,11	11	11	11	12	13	.	ERICH1	ERICH1	0	ERICH1_intron		cg01053087	chr8:687909	1135.5	.	ERICH1	ERICH1	CpG:_85_Island		238	0.455848	0.62404	4.8155e-52	9.4079e-46		0	0	0	0
chr8:6851798-6851820	2	AC	12	4	13,12,11,10	10	11	11	12	13	.	.	GS1-24F4.2	9346	.		cg12400130	chr8:6841832	-9977	.	GS1-24F4.2	GS1-24F4.2	.		216	0.08733	0.29972	2.7386e-18	5.35032e-12		1	0.625684	8.2129e-42	0.39148
chr8:6850742-6850757	2	AC	8	4	10,9,8,7	7	8	8	9	10	.	.	GS1-24F4.2	8290	.		cg19210176	chr8:6878106	27356.5	DEFB1	.	DEFB1	.		244	-0.071524	0.17381	1.1167e-11	2.18166e-05		1	-0.45236	4.2745e-19	0.20463
chr8:6850742-6850757	2	AC	8	4	10,9,8,7	7	8	8	9	10	.	.	GS1-24F4.2	8290	.		cg12400130	chr8:6841832	-8917.5	.	GS1-24F4.2	GS1-24F4.2	.		217	-0.088671	0.35113	5.834e-22	1.13977e-15		1	-0.649392	8.39592e-47	0.42171
chr8:67930784-67930821	2	GT	20	10	23,22,21,20,19,18,17,16,15,14	14	19	21	21	23	.	.	PREX2	21225	.		cg22107011	chr8:67901952	-28850.5	.	.	PREX2	.		243	-0.025083	0.29921	2.2982e-20	4.48992e-14		1	-0.651583	1.00864e-51	0.42456
chr8:67922411-67922429	2	AT	10	4	13,12,11,10	10	10	10	10	13	.	.	PREX2	29617	.		cg22107011	chr8:67901952	-20468	.	.	PREX2	.		243	0.082017	0.37214	3.6691e-26	7.16821e-20		1	0.719812	1.1422e-71	0.51813
chr8:67050548-67050584	2	GT	19	9	26,25,24,23,22,21,20,19,18	18	19	19	19	26	.	COPS5	COPS5	0	COPS5_intron		cg24190223	chr8:67066338	15772	CSPP1	CSPP1	CSPP1	CpG:_85_Shore_S		244	0.028949	0.19429	5.0818e-13	9.92816e-07		1	0.55235	5.3417e-33	0.30509
chr8:66164922-66164975	4	AAGG	14	8	16,15,14,13,12,11,10,8	8	12	13	14	16	.	TRIM55	TRIM55	0	TRIM55_intron		cg10646924	chr8:66124396	-40552.5	.	.	TRIM55	.		245	0.031627	0.3527	9.5705e-25	1.86976e-18		1	0.575422	1.83572e-37	0.33111
chr8:66018738-66018753	2	AT	9	3	11,10,9	9	9	9	10	11	.	DNAJC5B	DNAJC5B	0	DNAJC5B_intron		cg23266840	chr8:66023009	4263.5	DNAJC5B	DNAJC5B	DNAJC5B	.		245	-0.066669	0.20251	1.2844e-13	2.50929e-07		1	-0.724162	9.63284e-72	0.52441
chr8:66015555-66015586	2	AG	16	3	18,16,15	15	15	16	16	18	.	DNAC5B	DNAJC5B	0	DNAJC5B_intron		cg23266840	chr8:66023009	7438.5	DNAJC5B	DNAJC5B	DNAJC5B	.		245	0.06669	0.18515	1.8332e-12	3.58147e-06		1	0.735411	1.58045e-76	0.54083
chr8:655661-655717	4	CCTT	14	10	19,17,16,15,14,13,12,11,10,9	9	11	12	14	19	.	ERICH1	ERICH1	0	ERICH1_intron		cg12992745	chr8:677358	21669	.	ERICH1	ERICH1	CpG:_248_Shore_S		245	-0.006976	0.19512	4.0071e-13	7.82855e-07		1	-0.437093	5.18119e-17	0.19105
chr8:655661-655717	4	CCTT	14	10	19,17,16,15,14,13,12,11,10,9	9	11	12	14	19	.	ERICH1	ERICH1	0	ERICH1_intron		cg20780944	chr8:677132	21443	.	ERICH1	ERICH1	CpG:_248_Shore_S		245	-0.018797	0.23236	1.1663e-15	2.27857e-09		1	-0.43527	6.65809e-17	0.18946
chr8:655661-655717	4	CCTT	14	10	19,17,16,15,14,13,12,11,10,9	9	11	12	14	19	.	ERICH1	ERICH1	0	ERICH1_intron		cg08454824	chr8:687468	31779	.	ERICH1	ERICH1	CpG:_85_Island		245	0.034452	0.2625	8.4547e-18	1.65177e-11		1	0.576637	1.03501e-36	0.33251
chr8:655661-655717	4	CCTT	14	10	19,17,16,15,14,13,12,11,10,9	9	11	12	14	19	.	ERICH1	ERICH1	0	ERICH1_intron		cg12641240	chr8:688330	32641	.	ERICH1	ERICH1	CpG:_85_Shore_S		234	0.046497	0.28545	1.1334e-18	2.21429e-12		1	0.607478	9.61679e-41	0.36903
chr8:655661-655717	4	CCTT	14	10	19,17,16,15,14,13,12,11,10,9	9	11	12	14	19	.	ERICH1	ERICH1	0	ERICH1_intron		cg01053087	chr8:687909	32220	.	ERICH1	ERICH1	CpG:_85_Island		238	0.09526	0.51026	1.8836e-38	3.67993e-32		1	0.701449	2.45935e-62	0.49203
chr8:655661-655717	4	CCTT	14	10	19,17,16,15,14,13,12,11,10,9	9	11	12	14	19	.	ERICH1	ERICH1	0	ERICH1_intron		cg14755254	chr8:687813	32124	.	ERICH1	ERICH1	CpG:_85_Island		244	0.142592	0.52292	9.076e-41	1.77315e-34		1	0.691115	7.61157e-62	0.47764
chr8:64678882-64678910	2	GT	15	5	18,17,16,15,14	14	15	17	17	18	.	CYP7B1	CYP7B1	0	CYP7B1_intron		cg21034416	chr8:64670131	-8765	.	CYP7B1	CYP7B1	.		244	0.114606	0.44931	3.3965e-33	6.63564e-27		1	0.699786	5.48225e-66	0.4897
chr8:64643193-64643213	2	AC	12	3	13,12,11	11	11	11	12	13	.	CYP7B1	CYP7B1	0	CYP7B1_intron		cg21034416	chr8:64670131	26928	.	CYP7B1	CYP7B1	.		187	-0.229095	0.54001	5.0595e-33	9.88459e-27		1	-0.771414	9.46019e-68	0.59508
chr8:64541967-64542004	2	CT	19	4	22,21,20,19	19	19	19	21	22	.	.	LOC401463	32305	.		cg26789941	chr8:64550125	8139.5	.	.	LOC401463	.		245	-0.043129	0.26351	7.1509e-18	1.39705e-11		1	-0.553417	1.7127e-33	0.30627
chr8:64539839-64539861	3	ATC	8	4	11,10,9,8	8	8	8	10	11	.	.	LOC401463	34448	.		cg26789941	chr8:64550125	10275	.	.	LOC401463	.		245	-0.044523	0.27821	6.0116e-19	1.17447e-12		1	-0.566392	7.27548e-36	0.3208
chr8:64530908-64530942	2	AT	18	4	21,20,19,18	18	18	18	18	21	.	.	LOC401463	43367	.		cg26789941	chr8:64550125	19200	.	.	LOC401463	.		245	-0.04006	0.16187	5.9948e-11	0.000117119		1	-0.404685	4.76758e-14	0.16377
chr8:64373123-64373156	2	AG	17	5	19,18,17,16,15	15	15	15	15	19	MIR124-2HG	.	MIR124-2HG	62	.		cg27272679	chr8:64382078	8938.5	.	MIR124-2HG	MIR124-2HG	CpG:_68_Shelf_S		222	0.02981	0.18467	2.165e-11	4.2297e-05		1	0.533807	4.06368e-27	0.28495
chr8:6428746-6428769	2	AC	14	5	16,15,14,13,11	11	14	14	14	16	.	MCPH1	MCPH1	0	MCPH1_intron		cg02672830	chr8:6428930	172.5	.	MCPH1	MCPH1	.		232	0.127295	0.54033	1.082e-40	2.11387e-34		1	0.671952	7.27822e-57	0.45152
chr8:6329280-6329293	2	AT	8	3	9,8,7	7	8	8	8	9	.	.	LOC100287015	74263	.		cg07834475	chr8:6374630	45343.5	.	.	LOC100287015	.		211	0.137713	0.19453	1.8646e-11	3.64281e-05		1	0.568999	1.26912e-31	0.32376
chr8:62858037-62858077	3	GTT	15	3	17,16,15	15	16	16	16	17	.	NKAIN3	NKAIN3	0	NKAIN3_intron		cg12194929	chr8:62864196	6139	.	NKAIN3	NKAIN3	.		245	-0.189203	0.23036	1.607e-15	3.13955e-09		1	-0.44423	5.28905e-18	0.19734
chr8:62858037-62858077	3	GTT	15	3	17,16,15	15	16	16	16	17	.	NKAIN3	NKAIN3	0	NKAIN3_intron		cg20602954	chr8:62864203	6146	.	NKAIN3	NKAIN3	.		244	-0.221274	0.23378	1.0627e-15	2.07617e-09		1	-0.458105	1.2625e-19	0.20986
chr8:62838130-62838152	2	GT	12	7	16,15,14,13,12,11,8	8	13	14	14	16	.	NKAIN3	NKAIN3	0	NKAIN3_intron		cg20602954	chr8:62864203	26062	.	NKAIN3	NKAIN3	.		244	-0.106212	0.3091	3.3868e-21	6.61669e-15		1	-0.571594	4.34379e-36	0.32672
chr8:62838130-62838152	2	GT	12	7	16,15,14,13,12,11,8	8	13	14	14	16	.	NKAIN3	NKAIN3	0	NKAIN3_intron		cg12194929	chr8:62864196	26055	.	NKAIN3	NKAIN3	.		245	-0.095523	0.335	2.6044e-23	5.08814e-17		1	-0.574717	1.23345e-36	0.3303
chr8:6243989-6244029	4	AAAT	10	5	11,10,9,8,7	7	7	7	10	11	.	.	LOC100287015	159527	.		cg25286849	chr8:6257590	13581	.	.	LOC100287015	.		222	-0.100116	0.40985	5.3337e-27	1.04203e-20		1	-0.565447	1.67253e-32	0.31973
chr8:6242373-6242408	2	AT/GT	21	9	23,22,21,20,17,16,15,14,13	13	14	21	21	23	.	.	LOC100287015	161148	.		cg25286849	chr8:6257590	15199.5	.	.	LOC100287015	.		216	-0.02767	0.18613	3.3284e-11	6.5026e-05		1	-0.416785	2.4754e-13	0.17371
chr8:61719283-61719328	2	AG/GT	23	10	36,34,33,32,31,30,29,24,23,22	22	23	31	31	36	.	.	MIR4470	4425	.		cg16322188	chr8:61733412	14106.5	.	.	MIR4470	.		244	-0.016743	0.37316	2.3798e-26	4.64934e-20		1	-0.658293	2.06375e-53	0.43335
chr8:614607-614618	2	GT	6	3	7,6,4	4	6	6	7	7	.	.	ERICH1	128	.		cg19660806	chr8:638740	24127.5	.	ERICH1	ERICH1	.		245	-0.088781	0.22543	3.5247e-15	6.8861e-09		0	0	0	0
chr8:61261976-61262025	2	GT	25	13	29,28,27,26,25,24,23,22,21,19,18,17,16	16	24	26	27	29	.	.	CLVS1	25945	.		cg00465312	chr8:61259953	-2047.5	.	.	CLVS1	.		245	-0.020548	0.26723	3.8399e-18	7.5019e-12		0	0	0	0
chr8:61248645-61248661	2	AT	9	3	10,9,8	8	9	9	9	10	.	.	CLVS1	39309	.		cg00465312	chr8:61259953	11300	.	.	CLVS1	.		245	0.106691	0.23381	9.2356e-16	1.80433e-09		1	0.278271	0.000994075	0.077435
chr8:61130241-61130286	4	AAAT	12	7	16,15,14,13,12,11,10	10	12	12	13.25	16	.	.	CLVS1	157684	.		cg08599672	chr8:61122898	-7365.5	.	.	LOC100130298	.		233	-0.025108	0.24691	6.2162e-16	1.21444e-09		1	-0.528819	1.20532e-29	0.27965
chr8:61122570-61122612	2	AC	22	16	30,29,28,27,26,25,24,23,22,21,20,19,18,17,16,11	11	20	22	23	30	.	.	LOC100130298	154823	.		cg08599672	chr8:61122898	307	.	.	LOC100130298	.		234	-0.012866	0.36025	2.72e-24	5.31398e-18		1	-0.431937	1.54408e-16	0.18657
chr8:61112180-61112243	2	AC/AG	32	9	38,37,36,35,34,33,32,31,30	30	32	32	35	38	.	.	LOC100130298	144433	.		cg18509524	chr8:61140035	27823.5	.	.	CLVS1	CpG:_66_Shore_S		244	0.014987	0.15218	2.7148e-10	0.000530382		1	0.353765	2.82187e-09	0.12515
chr8:60905320-60905360	3	AAT	14	4	16,15,14,13	13	14	14	14	16	.	.	CHD7	37294	.		cg18576936	chr8:60903995	-1345	.	.	CHD7	.		245	-0.13848	0.1567	1.2842e-10	0.00025089		1	-0.368565	1.24667e-10	0.13584
chr8:58851810-58851849	4	AAAT	10	4	11,10,9,8	8	9	9	10	11	.	TOX	TOX	0	TOX_intron		cg06362710	chr8:58856697	4867.5	.	TOX	TOX	.		243	0.130421	0.37622	1.6642e-26	3.2513e-20		1	0.583644	1.09066e-38	0.34064
chr8:58851142-58851212	2	CT/AC	36	12	42,41,40,39,38,37,36,35,34,32,31,27	27	36	36	37	42	.	TOX	TOX	0	TOX_intron		cg06362710	chr8:58856697	5520	.	TOX	TOX	.		243	-0.035379	0.20249	1.6197e-13	3.16436e-07		1	-0.398497	9.62619e-13	0.1588
chr8:58637018-58637058	2	AC	21	6	23,22,21,20,19,17	17	19	21	21	23	.	NSMAF	NSMAF	0	NSMAF_intron		cg00890658	chr8:58649891	12853	.	NSMAF	NSMAF	.		245	0.019046	0.15888	9.3147e-11	0.000181978		1	0.434546	3.43475e-17	0.18883
chr8:58604511-58604570	2	AT	30	4	33,32,31,30	30	30	32	32	33	.	NSMAF	NSMAF	0	NSMAF_intron		cg00890658	chr8:58649891	45350.5	.	NSMAF	NSMAF	.		245	0.021465	0.17056	1.6479e-11	3.21945e-05		1	0.49973	2.8483e-25	0.24973
chr8:58549219-58549296	2	AT/AC/AT	39	7	43,42,41,40,39,38,37	37	39	39	40	43	.	.	SDCBP	3628	.		cg25020271	chr8:58552571	3313.5	SDCBP	.	SDCBP	CpG:_72_Shore_N		243	0.039709	0.15364	2.3891e-10	0.000466751		1	0.318418	2.19294e-06	0.10139
chr8:57575876-57575934	5	ATTTT	13	10	19,18,17,16,15,14,13,12,11,10	10	13	13.5	17	19	.	.	LOC286178	170215	.		cg23739762	chr8:57575423	-482	.	.	LOC286178	.		244	-0.022966	0.26939	3.1317e-18	6.11831e-12		1	-0.50895	3.05559e-26	0.25903
chr8:57563518-57563573	4	AAGG	14	9	19,18,17,16,15,14,13,12,10	10	14	15	16	19	.	.	LOC286178	182576	.		cg23739762	chr8:57575423	11877.5	.	.	LOC286178	.		244	-0.034121	0.21422	2.3391e-14	4.56983e-08		1	-0.486004	2.36108e-23	0.2362
chr8:57274044-57274082	4	AAAT	10	5	12,11,10,9,8	8	10	10	10	12	.	.	LINC00588	5461	.		cg17080227	chr8:57280687	6624	LINC00588	LINC00588	LINC00588	CpG:_32_Shore_S		245	-0.132302	0.16461	3.996e-11	7.80687e-05		1	-0.378153	1.936e-11	0.143
chr8:57274044-57274082	4	AAAT	10	5	12,11,10,9,8	8	10	10	10	12	.	.	LINC00588	5461	.		cg22535103	chr8:57279943	5880	LINC00588	LINC00588	LINC00588	CpG:_32_Island		243	-0.128821	0.23474	1.0436e-15	2.03885e-09		1	-0.488375	9.98949e-24	0.23851
chr8:57223629-57223671	2	AG	24	10	27,26,25,24,23,22,21,20,19,17	17	20	23	24	27	.	LINC01606	LINC01606	0	LINC01606_intron		cg04160749	chr8:57260012	36362	LOC286177	.	LOC286177	CpG:_117_Island		245	0.03023	0.20467	9.1833e-14	1.79411e-07		1	0.358971	5.81913e-09	0.12886
chr8:57223629-57223671	2	AG	24	10	27,26,25,24,23,22,21,20,19,17	17	20	23	24	27	.	LINC01606	LINC01606	0	LINC01606_intron		cg02725872	chr8:57202453	-21197	.	.	LINC01606	.		243	0.046177	0.37867	1.0327e-26	2.01756e-20		1	0.588821	2.0291e-37	0.34671
chr8:57190678-57190732	2	GT/AG	28	9	29,28,27,26,25,24,23,22,21	21	26	28	28	29	.	.	LINC01606	27544	.		cg08449448	chr8:57143942	-46763	.	.	LINC01606	CpG:_27_Shore_S,CpG:_63_Shore_S		238	-0.017924	0.16837	4.4192e-11	8.63366e-05		1	-0.300643	7.78207e-05	0.090386
chr8:57190678-57190732	2	GT/AG	28	9	29,28,27,26,25,24,23,22,21	21	26	28	28	29	.	.	LINC01606	27544	.		cg20374114	chr8:57205235	14530	.	.	LINC01606	CpG:_19_Shelf_N		180	0.018027	0.22453	1.8353e-11	3.58557e-05		0	0	0	0
chr8:57190678-57190732	2	GT/AG	28	9	29,28,27,26,25,24,23,22,21	21	26	28	28	29	.	.	LINC01606	27544	.		cg08280861	chr8:57143032	-47673	.	.	LINC01606	CpG:_63_Island		239	-0.046889	0.20187	2.8213e-13	5.51189e-07		1	-0.388278	8.11327e-12	0.15076
chr8:57190678-57190732	2	GT/AG	28	9	29,28,27,26,25,24,23,22,21	21	26	28	28	29	.	.	LINC01606	27544	.		cg08219700	chr8:57143467	-47238	.	.	LINC01606	CpG:_27_Island		240	-0.042821	0.25853	3.4932e-17	6.82456e-11		1	-0.462169	1.37641e-19	0.2136
chr8:57190678-57190732	2	GT/AG	28	9	29,28,27,26,25,24,23,22,21	21	26	28	28	29	.	.	LINC01606	27544	.		cg11062466	chr8:57143317	-47388	.	.	LINC01606	CpG:_27_Shore_N,CpG:_63_Shore_S		240	-0.084395	0.3377	4.4787e-23	8.7499e-17		1	-0.480333	8.30255e-22	0.23072
chr8:57184193-57184246	4	ATTT	15	8	17,16,15,14,13,12,11,10	10	14	15	15	17	.	.	LINC01606	34030	.		cg08449448	chr8:57143942	-40277.5	.	.	LINC01606	CpG:_27_Shore_S,CpG:_63_Shore_S		242	-0.032814	0.27946	7.9915e-19	1.56128e-12		1	-0.417911	2.01892e-15	0.17465
chr8:57184193-57184246	4	ATTT	15	8	17,16,15,14,13,12,11,10	10	14	15	15	17	.	.	LINC01606	34030	.		cg02725872	chr8:57202453	18233.5	.	.	LINC01606	.		243	0.06974	0.30353	1.0851e-20	2.11993e-14		1	0.569113	2.96105e-36	0.32389
chr8:57184193-57184246	4	ATTT	15	8	17,16,15,14,13,12,11,10	10	14	15	15	17	.	.	LINC01606	34030	.		cg08219700	chr8:57143467	-40752.5	.	.	LINC01606	CpG:_27_Island		244	-0.070279	0.34993	2.0062e-24	3.91945e-18		1	-0.576177	1.64385e-37	0.33198
chr8:57184193-57184246	4	ATTT	15	8	17,16,15,14,13,12,11,10	10	14	15	15	17	.	.	LINC01606	34030	.		cg08280861	chr8:57143032	-41187.5	.	.	LINC01606	CpG:_63_Island		243	-0.093149	0.38695	2.0292e-27	3.96439e-21		1	-0.582065	1.40232e-38	0.3388
chr8:57184193-57184246	4	ATTT	15	8	17,16,15,14,13,12,11,10	10	14	15	15	17	.	.	LINC01606	34030	.		cg11062466	chr8:57143317	-40902.5	.	.	LINC01606	CpG:_27_Shore_N,CpG:_63_Shore_S		244	-0.145083	0.49979	2.859e-38	5.58554e-32		1	-0.647094	5.34816e-52	0.41873
chr8:57129217-57129249	2	GT	18	12	24,23,22,21,20,19,18,17,16,14,13,12	12	18	18	18	24	.	.	LINC01606	89027	.		cg11062466	chr8:57143317	14084	.	.	LINC01606	CpG:_27_Shore_N,CpG:_63_Shore_S		243	0.071176	0.15644	1.5892e-10	0.000310477		1	0.383719	7.44675e-12	0.14724
chr8:57129217-57129249	2	GT	18	12	24,23,22,21,20,19,18,17,16,14,13,12	12	18	18	18	24	.	.	LINC01606	89027	.		cg08280861	chr8:57143032	13799	.	.	LINC01606	CpG:_63_Island		242	0.052293	0.15958	1.0978e-10	0.000214474		1	0.373818	6.08632e-11	0.13974
chr8:56863443-56863468	2	AG	13	3	13,12,10	10	10	10	13	13	.	.	IMPAD1	94463	.		cg10342016	chr8:56890063	26607.5	.	.	IMPAD1	.		185	0.050378	0.2844	5.4945e-15	1.07344e-08		1	0.542384	2.61692e-24	0.29418
chr8:56671388-56671436	2	AC	25	10	31,30,29,27,26,25,24,23,21,19	19	24	25	25	31	.	.	LINC00968	111566	.		cg10449644	chr8:56688744	17332	.	.	LINC00968	.		244	0.017277	0.14826	4.8005e-10	0.000937859		1	0.543213	9.44864e-32	0.29508
chr8:56448616-56448659	2	GT	22	6	25,24,23,22,21,20	20	20	22	22	25	PENK	LOC101929415	LOC101929415	0	LOC101929415_intron		cg19413350	chr8:56438508	-10129.5	.	.	PENK	CpG:_26_Island		244	-0.043479	0.14898	4.325e-10	0.000844962		0	0	0	0
chr8:56448616-56448659	2	GT	22	6	25,24,23,22,21,20	20	20	22	22	25	PENK	LOC101929415	LOC101929415	0	LOC101929415_intron		cg09654669	chr8:56438426	-10211.5	.	.	PENK	CpG:_26_Island		244	-0.023813	0.16806	2.6272e-11	5.13268e-05		1	-0.292098	0.000138666	0.085321
chr8:56440626-56440652	2	GT	15	6	18,17,16,15,14,13	13	15	15	16	18	.	.	PENK	305	.		cg11919837	chr8:56438176	-2463	.	.	PENK	CpG:_26_Shore_N		245	-0.068259	0.17848	5.0256e-12	9.81836e-06		1	-0.372142	6.87146e-11	0.13849
chr8:56440626-56440652	2	GT	15	6	18,17,16,15,14,13	13	15	15	16	18	.	.	PENK	305	.		cg21220214	chr8:56438389	-2250	.	.	PENK	CpG:_26_Island		243	-0.0291	0.19354	6.3601e-13	1.24255e-06		1	-0.380631	1.05335e-11	0.14488
chr8:56440626-56440652	2	GT	15	6	18,17,16,15,14,13	13	15	15	16	18	.	.	PENK	305	.		cg07080864	chr8:56447397	6758	LOC101929415,PENK	LOC101929415	LOC101929415	CpG:_15_Island		244	-0.055688	0.28526	2.1349e-19	4.17089e-13		1	-0.526137	3.09141e-29	0.27682
chr8:56440626-56440652	2	GT	15	6	18,17,16,15,14,13	13	15	15	16	18	.	.	PENK	305	.		cg09015433	chr8:56447411	6772	LOC101929415,PENK	LOC101929415	LOC101929415	CpG:_15_Island		245	-0.117614	0.28846	1.0383e-19	2.0285e-13		1	-0.576359	1.52597e-37	0.33219
chr8:56440626-56440652	2	GT	15	6	18,17,16,15,14,13	13	15	15	16	18	.	.	PENK	305	.		cg19413350	chr8:56438508	-2131	.	.	PENK	CpG:_26_Island		245	-0.094772	0.30285	8.4773e-21	1.65618e-14		1	-0.568463	4.66991e-36	0.32315
chr8:56440626-56440652	2	GT	15	6	18,17,16,15,14,13	13	15	15	16	18	.	.	PENK	305	.		cg09654669	chr8:56438426	-2213	.	.	PENK	CpG:_26_Island		245	-0.05248	0.34916	1.8676e-24	3.64867e-18		1	-0.652127	3.55044e-53	0.42527
chr8:56408954-56408990	2	AC	19	3	21,20,19	19	19	19	20	21	.	.	SDR16C6P	18245	.		cg24793642	chr8:56438626	29654	.	.	PENK	CpG:_26_Island		230	-0.092085	0.20145	8.4279e-13	1.64653e-06		0	0	0	0
chr8:56408954-56408990	2	AC	19	3	21,20,19	19	19	19	20	21	.	.	SDR16C6P	18245	.		cg07776626	chr8:56438216	29244	.	.	PENK	CpG:_26_Shore_N		210	-0.04941	0.22149	5.6777e-13	1.10924e-06		1	-0.507435	1.81679e-21	0.25749
chr8:56408954-56408990	2	AC	19	3	21,20,19	19	19	19	20	21	.	.	SDR16C6P	18245	.		cg17761419	chr8:56438190	29218	.	.	PENK	CpG:_26_Shore_N		245	-0.109748	0.24356	1.9113e-16	3.73405e-10		1	-0.425652	3.63284e-16	0.18118
chr8:56408954-56408990	2	AC	19	3	21,20,19	19	19	19	20	21	.	.	SDR16C6P	18245	.		cg11919837	chr8:56438176	29204	.	.	PENK	CpG:_26_Shore_N		245	-0.112151	0.30252	8.9804e-21	1.75447e-14		1	-0.43636	2.65431e-17	0.19041
chr8:56408954-56408990	2	AC	19	3	21,20,19	19	19	19	20	21	.	.	SDR16C6P	18245	.		cg21220214	chr8:56438389	29417	.	.	PENK	CpG:_26_Island		243	-0.046572	0.3094	3.8719e-21	7.56441e-15		1	-0.404883	5.45759e-14	0.16393
chr8:56408954-56408990	2	AC	19	3	21,20,19	19	19	19	20	21	.	.	SDR16C6P	18245	.		cg09015433	chr8:56447411	38439	LOC101929415,PENK	LOC101929415	LOC101929415	CpG:_15_Island		245	-0.168261	0.3707	3.0382e-26	5.93564e-20		1	-0.644903	2.9309e-51	0.4159
chr8:56408954-56408990	2	AC	19	3	21,20,19	19	19	19	20	21	.	.	SDR16C6P	18245	.		cg07080864	chr8:56447397	38425	LOC101929415,PENK	LOC101929415	LOC101929415	CpG:_15_Island		244	-0.081324	0.38061	5.5468e-27	1.08366e-20		1	-0.591743	3.37798e-40	0.35016
chr8:56408954-56408990	2	AC	19	3	21,20,19	19	19	19	20	21	.	.	SDR16C6P	18245	.		cg19413350	chr8:56438508	29536	.	.	PENK	CpG:_26_Island		245	-0.152894	0.4949	6.6016e-38	1.28973e-31		1	-0.656453	7.73822e-54	0.43093
chr8:56408954-56408990	2	AC	19	3	21,20,19	19	19	19	20	21	.	.	SDR16C6P	18245	.		cg09654669	chr8:56438426	29454	.	.	PENK	CpG:_26_Island		245	-0.084806	0.57248	9.7551e-47	1.90582e-40		1	-0.753353	2.1487e-82	0.56754
chr8:55815919-55815964	4	ATTT	12	5	14,13,12,10,7	7	12	12	12	14	.	TGS1	TGS1	0	TGS1_intron		cg17803471	chr8:55774890	-41051.5	TGS1,TMEM68	TGS1	TGS1	CpG:_77_Shore_S		245	-0.033102	0.16271	5.2926e-11	0.0001034		1	-0.516004	8.62436e-28	0.26626
chr8:54549062-54549108	4	ATTT	13	9	16,15,14,13,12,11,10,9,8	8	9	12	14	16	.	.	RP1	66988	.		cg22329875	chr8:54508642	-40443	.	.	SOX17	.		245	-0.041059	0.2199	8.4634e-15	1.65347e-08		1	-0.526906	4.5507e-29	0.27763
chr8:54509613-54509634	3	ATT	7	3	8,7,6	6	6	7	7	8	.	.	SOX17	48722	.		cg22329875	chr8:54508642	-981.5	.	.	SOX17	.		245	0.151999	0.2701	2.3687e-18	4.62766e-12		1	0.578559	6.11118e-38	0.33473
chr8:54499480-54499501	2	AG	12	4	13,12,11,10	10	10	12	12	13	.	.	SOX17	38589	.		cg22329875	chr8:54508642	9151.5	.	.	SOX17	.		245	0.123406	0.30688	4.1671e-21	8.14114e-15		1	0.749987	2.27496e-81	0.56248
chr8:54196030-54196052	2	GT	12	12	26,24,23,22,21,20,19,18,17,16,13,12	12	12	19	19	26	.	.	MRPL15	47517	.		cg11783602	chr8:54174524	-21517	.	.	MRPL15	.		245	-0.014987	0.21314	2.4513e-14	4.78903e-08		1	-0.389564	3.73542e-12	0.15176
chr8:54196030-54196052	2	GT	12	12	26,24,23,22,21,20,19,18,17,16,13,12	12	12	19	19	26	.	.	MRPL15	47517	.		cg06042504	chr8:54174763	-21278	.	.	MRPL15	.		244	-0.01415	0.23879	4.7543e-16	9.28833e-10		1	-0.407333	7.02512e-14	0.16592
chr8:54196030-54196052	2	GT	12	12	26,24,23,22,21,20,19,18,17,16,13,12	12	12	19	19	26	.	.	MRPL15	47517	.		cg20636351	chr8:54174840	-21201	.	.	MRPL15	.		245	-0.018312	0.30053	1.2737e-20	2.48839e-14		1	-0.450921	1.41223e-18	0.20333
chr8:54196030-54196052	2	GT	12	12	26,24,23,22,21,20,19,18,17,16,13,12	12	12	19	19	26	.	.	MRPL15	47517	.		cg02235343	chr8:54192047	-3994	.	.	MRPL15	.		238	0.007277	0.36	1.1562e-24	2.25883e-18		1	0.537727	3.89397e-30	0.28915
chr8:54196030-54196052	2	GT	12	12	26,24,23,22,21,20,19,18,17,16,13,12	12	12	19	19	26	.	.	MRPL15	47517	.		cg04303488	chr8:54192050	-3991	.	.	MRPL15	.		238	0.012422	0.44364	6.9409e-32	1.35602e-25		1	0.549936	3.93116e-32	0.30243
chr8:54170135-54170157	2	GT	15	5	16,15,14,13,12	12	13	13	15	16	.	.	MRPL15	21622	.		cg02235343	chr8:54192047	21901	.	.	MRPL15	.		238	-0.018906	0.25081	1.6292e-16	3.18292e-10		1	-0.460717	2.9816e-20	0.21226
chr8:54170135-54170157	2	GT	15	5	16,15,14,13,12	12	13	13	15	16	.	.	MRPL15	21622	.		cg04303488	chr8:54192050	21904	.	.	MRPL15	.		238	-0.031484	0.29415	1.3322e-19	2.60268e-13		1	-0.490275	4.84314e-24	0.24037
chr8:54170135-54170157	2	GT	15	5	16,15,14,13,12	12	13	13	15	16	.	.	MRPL15	21622	.		cg11783602	chr8:54174524	4378	.	.	MRPL15	.		245	0.060722	0.33977	1.0785e-23	2.10703e-17		1	0.436429	2.10603e-17	0.19047
chr8:54170135-54170157	2	GT	15	5	16,15,14,13,12	12	13	13	15	16	.	.	MRPL15	21622	.		cg06042504	chr8:54174763	4617	.	.	MRPL15	.		244	0.058298	0.39388	3.9729e-28	7.76174e-22		1	0.47244	1.03561e-21	0.2232
chr8:54170135-54170157	2	GT	15	5	16,15,14,13,12	12	13	13	15	16	.	.	MRPL15	21622	.		cg20636351	chr8:54174840	4694	.	.	MRPL15	.		245	0.071839	0.44911	2.6263e-33	5.13092e-27		1	0.501687	1.31619e-25	0.25169
chr8:52438588-52438610	2	GT	12	3	14,13,12	12	12	13	13	14	.	.	ST18	28710	.		cg21737226	chr8:52414108	-24491	.	.	ST18	.		244	0.099037	0.16016	8.4417e-11	0.000164923		0	0	0	0
chr8:51909230-51909252	2	GT	12	7	19,18,15,14,13,12,11	11	12	12	12	19	.	.	PCMTD1	10045	.		cg17249938	chr8:51888967	-20274	.	PCMTD1	PCMTD1	.		245	0.011301	0.17061	1.6351e-11	3.19445e-05		1	0.565075	2.67389e-35	0.31931
chr8:51909230-51909252	2	GT	12	7	19,18,15,14,13,12,11	11	12	12	12	19	.	.	PCMTD1	10045	.		cg13387498	chr8:51884322	-24919	.	PCMTD1	PCMTD1	.		229	0.016397	0.21646	1.0587e-13	2.06835e-07		1	0.468594	4.06662e-21	0.21958
chr8:51867477-51867520	2	GT	23	13	26,25,24,23,22,21,20,19,18,16,14,13,12	12	20	22	23	26	.	PCMTD1	PCMTD1	0	PCMTD1_intron		cg13387498	chr8:51884322	16823.5	.	PCMTD1	PCMTD1	.		229	-0.008281	0.18072	1.8248e-11	3.56506e-05		1	-0.361442	1.25299e-09	0.13064
chr8:5149140-5149171	2	AC	16	3	18,17,16	16	16	16	16	18	.	.	CSMD1	154227	.		cg11875917	chr8:5122975	-26180.5	.	.	CSMD1	CpG:_80_Island		236	0.072828	0.15928	1.9541e-10	0.000381767		1	0.311223	3.70018e-05	0.09686
chr8:5149140-5149171	2	AC	16	3	18,17,16	16	16	16	16	18	.	.	CSMD1	154227	.		cg05542364	chr8:5170216	21060.5	.	.	CSMD1	.		236	-0.069184	0.21794	3.5537e-14	6.94276e-08		1	-0.358371	1.85164e-09	0.12843
chr8:5149140-5149171	2	AC	16	3	18,17,16	16	16	16	16	18	.	.	CSMD1	154227	.		cg09862711	chr8:5145862	-3293.5	.	.	CSMD1	.		245	-0.077295	0.21589	1.5919e-14	3.11005e-08		0	0	0	0
chr8:5136185-5136222	2	AC	20	11	24,23,22,21,20,19,18,17,16,15,14	14	18	20	21	24	.	.	CSMD1	141272	.		cg11875917	chr8:5122975	-13228.5	.	.	CSMD1	CpG:_80_Island		236	0.014544	0.27857	2.5051e-18	4.89414e-12		1	0.43036	5.1166e-15	0.18521
chr8:5116212-5116242	2	GT	17	9	23,22,21,20,19,18,17,16,15	15	17	17	20	23	.	.	CSMD1	121299	.		cg11875917	chr8:5122975	6748	.	.	CSMD1	CpG:_80_Island		235	0.018265	0.15358	4.7695e-10	0.000931803		1	0.475983	3.40343e-20	0.22656
chr8:50376697-50376785	2	AT/AG	45	14	54,53,52,51,49,48,46,45,44,43,42,41,40,39	39	43	43	44	54	.	SNTG1	SNTG1	0	SNTG1_intron		cg13788620	chr8:50393948	17207	.	SNTG1	SNTG1	.		243	-0.009368	0.21931	1.1954e-14	2.33542e-08		1	-0.345398	1.64847e-07	0.1193
chr8:50376697-50376785	2	AT/AG	45	14	54,53,52,51,49,48,46,45,44,43,42,41,40,39	39	43	43	44	54	.	SNTG1	SNTG1	0	SNTG1_intron		cg23051267	chr8:50394133	17392	.	SNTG1	SNTG1	.		243	-0.027235	0.43476	1.0798e-31	2.10957e-25		1	-0.60339	8.6549e-39	0.36408
chr8:49316745-49316793	5	ATTTT	10	5	13,12,11,10,9	9	10	11	12	13	.	.	LOC100507464	179970	.		cg01324838	chr8:49298691	-18078	.	.	LOC100507464	.		245	-0.043759	0.16108	6.7357e-11	0.000131593		1	-0.519885	6.96248e-28	0.27028
chr8:49316745-49316793	5	ATTTT	10	5	13,12,11,10,9	9	10	11	12	13	.	.	LOC100507464	179970	.		cg02001299	chr8:49307508	-9261	.	.	LOC100507464	.		245	-0.056063	0.22928	1.9095e-15	3.73053e-09		1	-0.458443	1.0216e-19	0.21017
chr8:49310859-49310888	2	AG	15	6	20,19,17,16,15,10	10	10	17	19	20	.	.	LOC100507464	185875	.		cg01324838	chr8:49298691	-12182.5	.	.	LOC100507464	.		244	0.014664	0.36103	2.4614e-25	4.80876e-19		1	0.699493	3.0368e-62	0.48929
chr8:49310859-49310888	2	AG	15	6	20,19,17,16,15,10	10	10	17	19	20	.	.	LOC100507464	185875	.		cg02001299	chr8:49307508	-3365.5	.	.	LOC100507464	.		244	0.019361	0.54597	2.2231e-43	4.3432e-37		1	0.720486	3.25995e-68	0.5191
chr8:49294429-49294504	4	AGAT	19	7	22,21,20,19,18,17,16	16	18	19	20	22	.	.	LOC100507464	202259	.		cg01324838	chr8:49298691	4224.5	.	.	LOC100507464	.		245	-0.049544	0.21401	2.1402e-14	4.18124e-08		0	0	0	0
chr8:49294429-49294504	4	AGAT	19	7	22,21,20,19,18,17,16	16	18	19	20	22	.	.	LOC100507464	202259	.		cg02001299	chr8:49307508	13041.5	.	.	LOC100507464	.		245	-0.061849	0.28922	9.1184e-20	1.78143e-13		0	0	0	0
chr8:49265154-49265187	2	AC	18	8	20,19,18,17,16,15,14,12	12	16	16	19	20	.	.	PPDPFL	189062	.		cg01324838	chr8:49298691	33520.5	.	.	LOC100507464	.		233	-0.03059	0.25926	8.9919e-17	1.75672e-10		1	-0.61929	5.61399e-44	0.38352
chr8:49265154-49265187	2	AC	18	8	20,19,18,17,16,15,14,12	12	16	16	19	20	.	.	PPDPFL	189062	.		cg02001299	chr8:49307508	42337.5	.	.	LOC100507464	.		233	-0.039671	0.38991	1.3617e-26	2.66031e-20		1	-0.626586	1.82261e-45	0.39261
chr8:49220772-49220797	2	GT	13	4	16,15,14,13	13	13	15	15	16	.	.	PPDPFL	144680	.		cg02168270	chr8:49198419	-22365.5	.	.	C8orf22	.		243	-0.168411	0.59852	1.1547e-49	2.2559e-43		1	-0.830277	3.8419e-117	0.68936
chr8:49214163-49214194	2	AC	16	14	27,26,25,24,23,22,21,20,19,18,17,16,15,10	10	16	17	26	27	.	.	PPDPFL	138071	.		cg02168270	chr8:49198419	-15759.5	.	.	C8orf22	.		243	0.039562	0.75809	3.1678e-76	6.18884e-70		1	0.913526	4.86291e-179	0.83453
chr8:49209382-49209401	2	AT	12	10	27,26,23,15,14,13,12,10,9,8	8	9	9	13	27	.	.	PPDPFL	133290	.		cg02168270	chr8:49198419	-10972.5	.	.	C8orf22	.		139	-0.051063	0.50815	7.3728e-23	1.4404e-16		1	-0.909527	1.75766e-89	0.82724
chr8:49188522-49188560	2	GT/AT	20	7	23,22,21,20,19,18,15	15	18	20	21	23	.	.	PPDPFL	112430	.		cg02168270	chr8:49198419	9878	.	.	C8orf22	.		244	0.099986	0.38037	5.8194e-27	1.13692e-20		1	0.735731	2.9399e-74	0.5413
chr8:49181014-49181083	4	AGAT	18	5	20,19,18,17,16	16	17	18	18	20	.	.	PPDPFL	104922	.		cg27505123	chr8:49152241	-28807.5	.	.	C8orf22	.		240	0.02064	0.20862	9.0057e-14	1.75942e-07		1	0.531705	3.80216e-29	0.28271
chr8:49181014-49181083	4	AGAT	18	5	20,19,18,17,16	16	17	18	18	20	.	.	PPDPFL	104922	.		cg02168270	chr8:49198419	17370.5	.	.	C8orf22	.		241	-0.142351	0.38144	9.7473e-27	1.9043e-20		1	-0.607429	1.92588e-42	0.36897
chr8:49170488-49170572	5	AAAAT	17	10	20,19,18,17,16,15,14,13,12,11	11	14	16	18	20	.	.	PPDPFL	94396	.		cg02168270	chr8:49198419	27889	.	.	C8orf22	.		244	0.071221	0.48046	2.8596e-36	5.58671e-30		1	0.771972	1.93896e-88	0.59594
chr8:48904719-48904743	2	AC	13	7	17,16,15,14,13,12,11	11	12	13	13	17	.	.	S.I2	12855	.		cg22283653	chr8:48911649	6918	.	.	S.I2	CpG:_17_Shore_S		245	0.03266	0.15484	1.6883e-10	0.000329838		1	0.396321	5.49811e-13	0.15707
chr8:48441696-48441733	2	GT	20	3	21,20,11	11	20	20	20	21	.	.	LOC101929268	109834	.		cg08774009	chr8:48396534	-45180.5	.	.	LOC101929268	CpG:_45_Island		243	-0.056055	0.15861	1.1579e-10	0.000226215		1	-0.332024	2.14146e-07	0.11024
chr8:48413948-48413990	5	AAAAC	9	5	11,10,9,8,7	7	8	9	9	11	.	.	LOC101929268	137577	.		cg12093413	chr8:48432318	18349	.	.	LOC101929268	.		245	-0.029146	0.19098	7.5481e-13	1.47465e-06		1	-0.490571	4.40976e-24	0.24066
chr8:48413948-48413990	5	AAAAC	9	5	11,10,9,8,7	7	8	9	9	11	.	.	LOC101929268	137577	.		cg08774009	chr8:48396534	-17435	.	.	LOC101929268	CpG:_45_Island		245	0.069194	0.23403	8.9168e-16	1.74205e-09		1	0.488487	8.41217e-24	0.23862
chr8:48235890-48235940	3	ATT	17	6	19,18,17,16,15,10	10	17	17	17	19	.	.	UBE2V2	171183	.		cg15572684	chr8:48274352	38437	.	.	UBE2V2	.		244	-0.01024	0.19597	3.9291e-13	7.67616e-07		1	-0.468124	1.11411e-20	0.21914
chr8:4780416-4780455	4	CTGT/ACCT	10	4	13,12,11,10	10	10	10	10	13	.	CSMD1	CSMD1	0	CSMD1_intron		cg08236285	chr8:4780062	-373.5	.	CSMD1	CSMD1	.		245	-0.065969	0.15615	1.394e-10	0.000272342		1	-0.383888	4.08404e-12	0.14737
chr8:47685478-47685520	4	ATTT	11	6	14,13,12,11,10,9	9	11	12	13	14	.	SPIDR	SPIDR	0	SPIDR_intron		cg14986668	chr8:47697593	12094	.	SPIDR	SPIDR	.		239	-0.029209	0.19041	1.5714e-12	3.07e-06		1	-0.477692	2.89939e-19	0.22819
chr8:47658545-47658587	3	GTT	15	9	18,17,16,15,14,13,12,11,10	10	14	15	16	18	SPIDR	SPIDR	SPIDR	0	SPIDR_intron		cg14986668	chr8:47697593	39027	.	SPIDR	SPIDR	.		245	-0.018784	0.20059	1.7266e-13	3.37321e-07		1	-0.409561	1.51124e-14	0.16774
chr8:4579259-4579289	2	AT	18	4	19,18,17,16	16	18	18	18	19	.	CSMD1	CSMD1	0	CSMD1_intron		cg06055669	chr8:4542052	-37222	.	CSMD1	CSMD1	.		245	-0.209606	0.19356	5.0862e-13	9.93676e-07		1	-0.460087	1.04902e-19	0.21168
chr8:42777867-42777907	4	AAAT	10	6	12,11,10,9,8,7	7	9	10	10	12	.	.	CHRNA6	9082	.		cg00694350	chr8:42761338	-16549	.	CHRNA6	CHRNA6	.		244	-0.024788	0.16919	2.2215e-11	4.34008e-05		1	-0.305238	1.78919e-05	0.09317
chr8:42755270-42755286	4	GTTT	4	4	8,6,5,4	4	4	4	6	8	.	CHRNA6	CHRNA6	0	CHRNA6_intron		cg00694350	chr8:42761338	6060	.	CHRNA6	CHRNA6	.		244	0.030385	0.1767	7.2496e-12	1.41633e-05		1	0.328375	3.07203e-07	0.10783
chr8:42708475-42708497	2	AC	12	9	19,18,17,16,15,14,13,12,11	11	15	16	16	19	.	CHRNB3	CHRNB3	0	CHRNB3_intron		cg04071194	chr8:42695935	-12551	CHRNB3	.	CHRNB3	.		245	-0.007969	0.1638	4.5035e-11	8.79835e-05		1	-0.477483	3.04169e-22	0.22799
chr8:42681446-42681472	3	AAT	9	12	20,19,18,17,16,15,14,13,12,11,9,6	6	14	16	16	20	.	.	CHRNB3	15894	.		cg04071194	chr8:42695935	14476	CHRNB3	.	CHRNB3	.		245	-0.005793	0.28336	2.4978e-19	4.87988e-13		1	-0.455807	2.37107e-19	0.20776
chr8:42303055-42303177	2	AG	62	6	62,61,60,59,58,57	57	62	62	62	62	.	IKBKB	IKBKB	0	IKBKB_intron		cg23363015	chr8:42265866	-37250	.	LOC101929897	LOC101929897	.		204	0.025932	0.24953	2.834e-14	5.5367e-08		0	0	0	0
chr8:42274525-42274547	3	GTT	8	3	9,8,7	7	8	8	8	9	.	IKBKB	IKBKB	0	IKBKB_intron		cg23363015	chr8:42265866	-8670	.	LOC101929897	LOC101929897	.		245	0.103582	0.25986	1.3116e-17	2.56243e-11		1	0.611465	2.30706e-44	0.37389
chr8:42273420-42273439	2	AT	10	4	11,10,9,8	8	10	10	10	11	.	IKBKB	IKBKB	0	IKBKB_intron		cg23363015	chr8:42265866	-7563.5	.	LOC101929897	LOC101929897	.		245	0.075431	0.22243	5.6734e-15	1.1084e-08		1	0.667952	2.04221e-57	0.44616
chr8:42262427-42262458	4	ATTT	8	6	13,12,11,10,9,8	8	8	8	8	13	.	LOC101929897	LOC101929897	0	LOC101929897_intron		cg23363015	chr8:42265866	3423.5	.	LOC101929897	LOC101929897	.		245	-0.035833	0.33304	3.7351e-23	7.29715e-17		1	-0.767327	8.3879e-88	0.58879
chr8:42249418-42249458	2	GT/AT	22	12	32,31,30,29,28,27,26,24,23,22,21,20	20	22	22	22	32	.	.	LOC101929897	5865	.		cg12091331	chr8:42207796	-41642	PLAT	.	PLAT	.		244	-0.031742	0.15089	3.2758e-10	0.000639983		1	-0.463605	1.32085e-20	0.21493
chr8:42249418-42249458	2	GT/AT	22	12	32,31,30,29,28,27,26,24,23,22,21,20	20	22	22	22	32	.	.	LOC101929897	5865	.		cg23363015	chr8:42265866	16428	.	LOC101929897	LOC101929897	.		244	-0.016138	0.19578	4.045e-13	7.9026e-07		1	-0.659447	6.27619e-55	0.43487
chr8:42249418-42249458	2	GT/AT	22	12	32,31,30,29,28,27,26,24,23,22,21,20	20	22	22	22	32	.	.	LOC101929897	5865	.		cg14540792	chr8:42207634	-41804	PLAT	PLAT	PLAT	.		242	-0.034021	0.2037	1.5103e-13	2.95063e-07		1	-0.478278	1.62588e-22	0.22875
chr8:42249418-42249458	2	GT/AT	22	12	32,31,30,29,28,27,26,24,23,22,21,20	20	22	22	22	32	.	.	LOC101929897	5865	.		cg02252925	chr8:42207756	-41682	PLAT	.	PLAT	.		244	-0.017859	0.21104	3.8446e-14	7.51108e-08		1	-0.460022	3.62619e-20	0.21162
chr8:42249418-42249458	2	GT/AT	22	12	32,31,30,29,28,27,26,24,23,22,21,20	20	22	22	22	32	.	.	LOC101929897	5865	.		cg22038738	chr8:42207155	-42283	PLAT	PLAT	PLAT	.		244	-0.022513	0.24546	1.6163e-16	3.15772e-10		1	-0.515878	1.05102e-27	0.26613
chr8:42203970-42204039	2	AT/AC	36	13	45,44,42,41,40,39,38,37,36,35,34,33,30	30	36	36	37	45	.	PLAT	PLAT	0	PLAT_intron		cg12765042	chr8:42207780	3775.5	PLAT	.	PLAT	.		243	-0.025512	0.15571	1.7681e-10	0.000345428		1	-0.408363	6.10061e-13	0.16676
chr8:42203970-42204039	2	AT/AC	36	13	45,44,42,41,40,39,38,37,36,35,34,33,30	30	36	36	37	45	.	PLAT	PLAT	0	PLAT_intron		cg12091331	chr8:42207796	3791.5	PLAT	.	PLAT	.		243	-0.030037	0.16826	2.8008e-11	5.47184e-05		1	-0.421319	3.37661e-14	0.17751
chr8:42203970-42204039	2	AT/AC	36	13	45,44,42,41,40,39,38,37,36,35,34,33,30	30	36	36	37	45	.	PLAT	PLAT	0	PLAT_intron		cg02252925	chr8:42207756	3751.5	PLAT	.	PLAT	.		243	-0.014913	0.18325	3.0084e-12	5.87742e-06		1	-0.391701	2.10446e-11	0.15343
chr8:42203970-42204039	2	AT/AC	36	13	45,44,42,41,40,39,38,37,36,35,34,33,30	30	36	36	37	45	.	PLAT	PLAT	0	PLAT_intron		cg22038738	chr8:42207155	3150.5	PLAT	PLAT	PLAT	.		243	-0.019023	0.22022	1.0371e-14	2.02615e-08		1	-0.419774	4.3479e-14	0.17621
chr8:42203970-42204039	2	AT/AC	36	13	45,44,42,41,40,39,38,37,36,35,34,33,30	30	36	36	37	45	.	PLAT	PLAT	0	PLAT_intron		cg14540792	chr8:42207634	3629.5	PLAT	PLAT	PLAT	.		242	-0.032076	0.23395	1.3551e-15	2.64742e-09		1	-0.437984	6.06733e-16	0.19183
chr8:42194216-42194283	2	AG/GT	36	19	45,44,43,42,41,40,39,38,37,36,35,34,33,31,30,29,27,26,25	25	29	30	35.75	45	.	PLAT	PLAT	0	PLAT_intron		cg12054981	chr8:42179869	-14380.5	.	PLAT	PLAT	.		244	0.013164	0.14981	3.8349e-10	0.000749213		1	0.456673	3.377e-19	0.20855
chr8:42194216-42194283	2	AG/GT	36	19	45,44,43,42,41,40,39,38,37,36,35,34,33,31,30,29,27,26,25	25	29	30	35.75	45	.	PLAT	PLAT	0	PLAT_intron		cg24514275	chr8:42179652	-14597.5	.	PLAT	PLAT	.		244	0.008308	0.15329	2.3105e-10	0.000451395		1	0.454753	5.67682e-19	0.2068
chr8:42194216-42194283	2	AG/GT	36	19	45,44,43,42,41,40,39,38,37,36,35,34,33,31,30,29,27,26,25	25	29	30	35.75	45	.	PLAT	PLAT	0	PLAT_intron		cg17828057	chr8:42180009	-14240.5	.	PLAT	PLAT	.		243	0.010548	0.18036	4.6393e-12	9.06366e-06		1	0.461443	8.13969e-20	0.21293
chr8:41663085-41663141	2	GT/CT/GT	29	8	34,33,32,31,30,29,28,26	26	31	32	32	34	.	ANK1	ANK1	0	ANK1_intron		cg01678292	chr8:41665355	2242	ANK1	ANK1	ANK1	.		245	-0.019529	0.16472	3.93e-11	7.67792e-05		1	-0.412104	3.7129e-14	0.16983
chr8:41663085-41663141	2	GT/CT/GT	29	8	34,33,32,31,30,29,28,26	26	31	32	32	34	.	ANK1	ANK1	0	ANK1_intron		cg09232650	chr8:41666239	3126	ANK1	ANK1	ANK1	.		244	0.049468	0.34369	6.4304e-24	1.25629e-17		1	0.640133	1.88256e-48	0.40977
chr8:41658898-41658936	4	AAAT	10	7	12,11,10,9,8,7,6	6	6	10	11	12	MIR486-1,MIR486-2	ANK1	ANK1	0	ANK1_intron		cg10034027	chr8:41651648	-7269	.	.	ANK1	CpG:_27_Shore_S,CpG:_58_Shore_N		245	0.018903	0.15071	3.095e-10	0.000604661		1	0.375233	4.19972e-11	0.1408
chr8:41658898-41658936	4	AAAT	10	7	12,11,10,9,8,7,6	6	6	10	11	12	MIR486-1,MIR486-2	ANK1	ANK1	0	ANK1_intron		cg21772509	chr8:41646321	-12596	NKX6-3	NKX6-3	NKX6-3	CpG:_38_Shore_N		234	-0.024072	0.16134	1.7434e-10	0.000340603		1	-0.350571	5.99824e-09	0.1229
chr8:41658898-41658936	4	AAAT	10	7	12,11,10,9,8,7,6	6	6	10	11	12	MIR486-1,MIR486-2	ANK1	ANK1	0	ANK1_intron		cg07161603	chr8:41651099	-7818	.	.	ANK1	CpG:_27_Shore_S		244	-0.011012	0.1621	6.3415e-11	0.000123892		0	0	0	0
chr8:41655130-41655153	2	GT	12	5	15,14,13,12,11	11	11	12	14	15	.	ANK1	ANK1	0	ANK1_3utr		cg00088007	chr8:41647047	-8094.5	NKX6-3	NKX6-3	NKX6-3	CpG:_38_Shore_S		244	0.017329	0.23038	1.8287e-15	3.57268e-09		1	0.287863	0.000254998	0.082865
chr8:41655130-41655153	2	GT	12	5	15,14,13,12,11	11	11	12	14	15	.	ANK1	ANK1	0	ANK1_3utr		cg21772509	chr8:41646321	-8820.5	NKX6-3	NKX6-3	NKX6-3	CpG:_38_Shore_N		234	0.062006	0.49508	2.7767e-36	5.42476e-30		1	0.617049	2.0796e-45	0.38075
chr8:41636930-41636949	4	GTTT	5	4	7,5,4,3	3	4	5	5	7	.	.	NKX6-3	8228	.		cg21772509	chr8:41646321	9381.5	NKX6-3	NKX6-3	NKX6-3	CpG:_38_Shore_N		234	-0.133416	0.38343	3.6474e-26	7.12582e-20		1	-0.589915	7.46418e-40	0.348
chr8:41603897-41603925	4	AATG	7	6	11,10,9,8,7,6	6	7	8	9	11	.	GPAT4	GPAT4	0	GPAT4_intron		cg25897519	chr8:41569896	-34015	.	LOC102723729	LOC102723729	CpG:_73_Shelf_S		245	-0.025073	0.16955	1.9166e-11	3.7444e-05		1	-0.430744	7.3896e-17	0.18554
chr8:41582663-41582700	2	AG/GT	19	7	27,24,23,22,21,20,19	19	19	20	22	27	.	GPAT4	GPAT4	0	GPAT4_intron		cg25897519	chr8:41569896	-12785.5	.	LOC102723729	LOC102723729	CpG:_73_Shelf_S		245	0.020616	0.17851	4.9996e-12	9.76757e-06		1	0.436738	2.68152e-17	0.19074
chr8:41582663-41582700	2	AG/GT	19	7	27,24,23,22,21,20,19	19	19	20	22	27	.	GPAT4	GPAT4	0	GPAT4_intron		cg21145212	chr8:41577527	-5154.5	GPAT4,LOC102723729	LOC102723729	LOC102723729	CpG:_100_Shore_N		244	0.021393	0.18853	1.221e-12	2.38543e-06		1	0.421841	1.14163e-15	0.17795
chr8:41558240-41558282	2	AT	23	4	24,23,22,9	9	23	23	23	24	.	LOC102723729	LOC102723729	0	LOC102723729_intron		cg12174341	chr8:41566823	8562	.	LOC102723729	LOC102723729	CpG:_73_Island		240	-0.005104	0.17205	2.1356e-11	4.17226e-05		1	-0.401335	8.76275e-13	0.16107
chr8:41556186-41556219	2	AT/AC	20	4	23,22,20,19	19	20	20	22	23	.	LOC102723729	LOC102723729	0	LOC102723729_intron		cg25897519	chr8:41569896	13693.5	.	LOC102723729	LOC102723729	CpG:_73_Shelf_S		244	0.026898	0.20103	1.8091e-13	3.53438e-07		1	0.640094	4.72178e-50	0.40972
chr8:41433933-41433956	4	ATCT	6	4	8,7,6,5	5	6	7	7	8	.	.	SNORD65B	7207	.		cg14770361	chr8:41421168	-12776.5	.	.	GOLGA7	.		245	-0.049024	0.17206	1.3163e-11	2.57162e-05		1	-0.463185	9.12371e-21	0.21454
chr8:41255960-41256004	2	GT	23	8	30,29,28,27,26,25,24,23	23	23	23	27	30	.	.	SFRP1	5958	.		cg25927227	chr8:41269699	13717	.	SFRP1	SFRP1	.		243	0.019765	0.28424	3.0131e-19	5.8866e-13		1	0.472186	1.11755e-21	0.22296
chr8:41255960-41256004	2	GT	23	8	30,29,28,27,26,25,24,23	23	23	23	27	30	.	.	SFRP1	5958	.		cg25569470	chr8:41250972	-5010	.	.	SFRP1	.		245	0.037014	0.70336	4.5811e-66	8.94996e-60		1	0.763033	3.68785e-86	0.58222
chr8:41224384-41224426	2	AC	22	10	27,26,25,24,23,22,21,20,19,18	18	22	22	23	27	.	.	SFRP1	37536	.		cg25569470	chr8:41250972	26567	.	.	SFRP1	.		245	0.025955	0.155	1.649e-10	0.00032216		1	0.496387	9.49132e-25	0.2464
chr8:41028510-41028544	4	ATTT	9	6	14,13,12,11,10,9	9	9	11	11	14	.	.	ZMAT4	130685	.		cg08208317	chr8:40984654	-43873	.	.	ZMAT4	.		245	0.012646	0.16182	6.0344e-11	0.000117892		0	0	0	0
chr8:40995690-40995713	2	AC	13	4	13,12,11,10	10	10	10	11	13	.	.	ZMAT4	97865	.		cg08208317	chr8:40984654	-11047.5	.	.	ZMAT4	.		245	-0.014964	0.20477	9.0404e-14	1.7662e-07		0	0	0	0
chr8:40973060-40973095	2	GT	18	4	20,19,18,17	17	18	19	20	20	.	.	ZMAT4	75235	.		cg08208317	chr8:40984654	11576.5	.	.	ZMAT4	.		245	0.02339	0.27764	6.6211e-19	1.29354e-12		0	0	0	0
chr8:40708543-40708611	2	AC/CT	35	14	42,41,40,39,38,37,36,35,34,33,32,30,29,28	28	32	34	37	42	.	ZMAT4	ZMAT4	0	ZMAT4_intron		cg18440960	chr8:40665310	-43267	.	ZMAT4	ZMAT4	.		244	0.014307	0.15157	2.9659e-10	0.000579439		1	0.511517	2.35991e-23	0.26165
chr8:40530510-40530542	2	AC	18	13	26,25,24,23,22,21,20,19,18,17,16,15,14	14	17	20	21	26	.	.	ZMAT4	50	.		cg16112795	chr8:40524637	-5889	.	.	ZMAT4	.		241	-0.029288	0.44953	7.963e-33	1.55571e-26		1	-0.755857	9.47018e-83	0.57132
chr8:40522445-40522489	2	AT	26	17	38,29,28,27,26,25,24,23,22,21,20,19,18,17,16,15,7	7	21	23	25	38	.	.	ZMAT4	8103	.		cg16112795	chr8:40524637	2170	.	.	ZMAT4	.		242	0.018107	0.24719	1.6278e-16	3.18018e-10		1	0.593902	1.27703e-36	0.35272
chr8:40515563-40515591	2	AT	18	13	30,29,28,27,26,25,24,23,21,20,19,18,17	17	19	25	26	30	.	.	ZMAT4	15001	.		cg16112795	chr8:40524637	9060	.	.	ZMAT4	.		243	-0.02116	0.45676	8.8132e-34	1.72181e-27		1	-0.712959	1.54794e-63	0.50831
chr8:40502423-40502452	2	GT	16	7	17,16,15,14,13,12,11	11	14	14	14	17	.	.	ZMAT4	28140	.		cg16112795	chr8:40524637	22199.5	.	.	ZMAT4	.		245	-0.037963	0.24235	2.3261e-16	4.54443e-10		1	-0.522542	1.26769e-28	0.27305
chr8:40497221-40497324	6	AGAGGG	17	5	21,19,18,17,16	16	17	17	18.25	21	.	.	ZMAT4	33268	.		cg16112795	chr8:40524637	27364.5	.	.	ZMAT4	.		244	0.057299	0.42423	7.6535e-31	1.49524e-24		1	0.687634	1.70866e-54	0.47284
chr8:39951027-39951063	5	AAAAC	8	6	13,12,11,10,9,8	8	10	10	11	13	.	IDO2	IDO2	0	IDO2_intron		cg12565636	chr8:39939978	-11067	.	IDO2	IDO2	.		244	-0.025414	0.18599	1.7919e-12	3.50078e-06		0	0	0	0
chr8:39568347-39568391	2	AG	26	13	36,34,33,32,31,30,29,28,27,26,25,24,22	22	26	27	29.25	36	.	LOC100130964	LOC100130964	0	LOC100130964_intron		cg10387963	chr8:39522893	-45476	ADAM3A	ADAM3A	ADAM3A	CpG:_30_Island		195	0.05341	0.20096	4.9735e-11	9.71658e-05		1	0.401373	1.36889e-11	0.1611
chr8:39092332-39092356	2	AC	13	5	16,15,14,13,12	12	13	13	15	16	.	ADAM9	ADAM9	0	ADAM9_intron		cg03780701	chr8:39107867	15523	ADAM32	ADAM32	ADAM32	CpG:_47_Island		233	0.040062	0.17931	1.4877e-11	2.90647e-05		1	0.373858	8.19666e-11	0.13977
chr8:38907819-38907865	4	ATGT	12	6	14,13,12,11,10,9	9	12	12	13	14	.	PLEKHA2	PLEKHA2	0	PLEKHA2_intron		cg04142296	chr8:38900014	-7828	PLEKHA2	.	PLEKHA2	CpG:_77_Shore_N		244	0.031853	0.15366	2.1883e-10	0.000427522		1	0.377783	2.6455e-11	0.14272
chr8:38731738-38731769	3	AAC	12	9	16,15,14,13,12,11,10,9,8	8	12	13	13	16	.	TACC1	TACC1	0	TACC1_intron		cg01591028	chr8:38704785	-26968.5	.	.	TACC1	.		245	-0.029805	0.1918	6.661e-13	1.30134e-06		1	-0.60431	1.99406e-42	0.36519
chr8:38709779-38709827	2	GT	26	20	31,30,29,28,27,26,25,24,23,22,21,20,19,18,17,16,15,14,11,10	10	14	21.5	27	31	.	.	TACC1	18359	.		cg01591028	chr8:38704785	-5018	.	.	TACC1	.		244	-0.004666	0.15133	3.0743e-10	0.000600617		1	-0.436016	8.4108e-17	0.19011
chr8:37228276-37228316	3	AAT	14	3	14,13,12	12	12	12	12	14	.	MIR1268A	MIR1268A	0	MIR1268A_intron		cg01272629	chr8:37224923	-3373	.	MIR1268A	MIR1268A	.		243	0.114989	0.29433	5.347e-20	1.04463e-13		1	0.542522	5.0704e-32	0.29433
chr8:37228276-37228316	3	AAT	14	3	14,13,12	12	12	12	12	14	.	MIR1268A	MIR1268A	0	MIR1268A_intron		cg23224142	chr8:37225019	-3277	.	MIR1268A	MIR1268A	.		243	0.11143	0.32481	2.4946e-22	4.87363e-16		1	0.480302	7.77521e-23	0.23069
chr8:37200530-37200570	3	AAC	14	5	14,13,12,11,9	9	9	13	13	14	.	MIR1268A	MIR1268A	0	MIR1268A_intron		cg23224142	chr8:37225019	24469	.	MIR1268A	MIR1268A	.		242	0.016807	0.17672	8.8172e-12	1.72259e-05		0	0	0	0
chr8:3556393-3556414	2	AT	14	17	31,29,27,26,25,24,23,22,21,20,19,18,17,16,15,14,13	13	14	17	23	31	.	CSMD1	CSMD1	0	CSMD1_intron		cg16761276	chr8:3555206	-1197.5	.	CSMD1	CSMD1	.		220	-0.009214	0.21747	2.8065e-13	5.48297e-07		1	-0.446397	1.51045e-14	0.19927
chr8:3541576-3541597	5	AAAAT	4	3	5,4,3	3	3	4	4	5	.	CSMD1	CSMD1	0	CSMD1_intron		cg16761276	chr8:3555206	13619.5	.	CSMD1	CSMD1	.		225	0.075847	0.20489	9.1648e-13	1.7905e-06		1	0.382871	6.32082e-10	0.14659
chr8:35413258-35413309	2	GT	27	12	36,35,34,33,32,31,30,29,28,27,26,22	22	29	29	33	36	.	UNC5D	UNC5D	0	UNC5D_intron		cg26764980	chr8:35377711	-35572.5	.	UNC5D	UNC5D	.		237	-0.00922	0.17233	2.7407e-11	5.35442e-05		0	0	0	0
chr8:35413258-35413309	2	GT	27	12	36,35,34,33,32,31,30,29,28,27,26,22	22	29	29	33	36	.	UNC5D	UNC5D	0	UNC5D_intron		cg14667123	chr8:35378076	-35207.5	.	UNC5D	UNC5D	.		237	-0.023165	0.26209	3.105e-17	6.06615e-11		1	-0.386031	7.3708e-12	0.14902
chr8:35371177-35371204	2	AC	14	5	15,14,13,12,10	10	12	14	14	15	.	UNC5D	UNC5D	0	UNC5D_intron		cg26764980	chr8:35377711	6520.5	.	UNC5D	UNC5D	.		244	0.023626	0.26901	3.3366e-18	6.51862e-12		1	0.301591	2.93286e-05	0.090957
chr8:35371177-35371204	2	AC	14	5	15,14,13,12,10	10	12	14	14	15	.	UNC5D	UNC5D	0	UNC5D_intron		cg14667123	chr8:35378076	6885.5	.	UNC5D	UNC5D	.		244	0.057408	0.37704	1.1169e-26	2.18205e-20		1	0.435821	1.99347e-17	0.18994
chr8:35199606-35199649	2	AT/AC	22	13	33,32,31,30,29,28,27,26,25,24,23,22,21	21	22	26	27	33	.	.	UNC5D	35826	.		cg11173447	chr8:35152211	-47416.5	.	.	UNC5D	.		243	0.043193	0.26092	1.496e-17	2.92269e-11		1	0.542245	9.47429e-32	0.29403
chr8:35129394-35129416	3	AAT	8	11	20,19,18,17,16,15,14,13,12,11,8	8	8	14	15	20	.	.	UNC5D	106059	.		cg11173447	chr8:35152211	22806	.	.	UNC5D	.		243	0.032212	0.18708	1.6901e-12	3.3019e-06		1	0.489704	1.00239e-23	0.23981
chr8:33850482-33850502	2	AG	12	4	15,14,13,12	12	12	12	13	15	.	.	DUSP26	250377	.		cg04338863	chr8:33813101	-37391	.	.	DUSP26	.		245	0.047571	0.24002	3.3906e-16	6.62411e-10		1	0.347203	1.07083e-08	0.12055
chr8:33847486-33847563	4	CCTT	21	17	28,26,25,24,23,22,21,20,19,18,17,16,15,14,13,12,11	11	15	20	21	28	.	.	DUSP26	247381	.		cg04338863	chr8:33813101	-34423.5	.	.	DUSP26	.		242	-0.005921	0.17356	1.4082e-11	2.75116e-05		1	-0.299067	0.000818961	0.089441
chr8:33811909-33811965	2	AC	30	15	39,38,37,36,35,34,33,32,31,30,29,28,27,25,24	24	27	31	32	39	.	.	DUSP26	211804	.		cg04338863	chr8:33813101	1164	.	.	DUSP26	.		244	-0.007958	0.17851	5.5336e-12	1.08108e-05		1	-0.375153	1.25332e-10	0.14074
chr8:31303760-31303807	4	ATTT	12	7	12,11,10,9,8,7,6	6	8	8	9	12	.	.	WRN	127890	.		cg06237677	chr8:31286354	-17429.5	.	.	WRN	.		245	-0.014408	0.1522	2.4867e-10	0.000485819		1	-0.382243	1.02457e-11	0.14611
chr8:31287988-31288047	2	CT/AC	32	10	35,34,33,32,31,30,29,28,27,26	26	28	29	32	35	.	.	WRN	112118	.		cg06237677	chr8:31286354	-1663.5	.	.	WRN	.		241	-0.008562	0.1784	7.5954e-12	1.48389e-05		1	-0.435339	4.27822e-17	0.18952
chr8:31282467-31282502	2	AC	18	8	25,24,23,22,21,19,18,17	17	18	23	23	25	.	.	WRN	106597	.		cg06237677	chr8:31286354	3869.5	.	.	WRN	.		244	0.008604	0.24927	8.6948e-17	1.69868e-10		1	0.457154	1.84668e-19	0.20899
chr8:30944863-30944886	2	AC	13	3	14,13,12	12	12	13	13	14	.	.	TEX15	31856	.		cg11626186	chr8:30923589	-21285.5	.	.	PURG	.		245	0.049476	0.15536	1.5641e-10	0.000305574		1	0.388549	2.03047e-12	0.15097
chr8:30167692-30167714	4	CTTT	6	4	9,8,7,6	6	6	6	6	9	.	DCTN6	DCTN6	0	DCTN6_intron		cg04374813	chr8:30155373	-12330	DCTN6	MIR548O2	MIR548O2	CpG:_51_Shore_N		243	-0.040118	0.17164	1.6985e-11	3.31831e-05		1	-0.34703	7.49686e-09	0.12043
chr8:30083752-30083791	4	ATTC	11	6	12,11,10,9,8,7	7	9	9	9	12	SARAF	.	SARAF	545	.		cg08386913	chr8:30083574	-197.5	SARAF	MIR548O2	MIR548O2	CpG:_62_Shore_S		242	-0.033869	0.21291	3.6623e-14	7.15493e-08		1	-0.517977	6.04189e-28	0.2683
chr8:29823768-29823817	2	GT/AG	25	4	28,27,26,25	25	25	25	26	28	.	LOC101929470	LOC101929470	0	LOC101929470_intron		cg02102922	chr8:29835753	11960.5	.	.	LOC101929470	.		242	-0.040365	0.23301	1.5735e-15	3.0741e-09		1	-0.593296	2.135e-40	0.352
chr8:29814286-29814316	4	AAAT	8	5	10,9,8,7,5	5	7	8	8	10	.	.	LOC101929470	688	.		cg02102922	chr8:29835753	21452	.	.	LOC101929470	.		242	0.035091	0.22188	9.0765e-15	1.77325e-08		1	0.497464	5.07353e-25	0.24747
chr8:29051358-29051375	4	AACC	5	3	6,5,3	3	5	5	6	6	.	HMBOX1	HMBOX1	0	HMBOX1_3utr,HMBOX1_5utr		cg20212339	chr8:29051395	28.5	.	HMBOX1	HMBOX1	.		245	-0.029597	0.16423	4.2286e-11	8.26129e-05		1	-0.331134	1.86849e-07	0.10965
chr8:28652661-28652701	2	AT	21	3	22,21,12	12	21	21	22	22	.	.	EXTL3-AS1	45702	.		cg05141217	chr8:28633861	-18820	.	.	FZD3	.		242	0.370793	0.42075	2.7589e-30	5.38998e-24		1	0.890758	7.0997e-160	0.79345
chr8:28652026-28652060	2	GT	18	7	27,26,24,23,22,19,18	18	18	18	23	27	.	.	EXTL3-AS1	46343	.		cg23665710	chr8:28619160	-32883	.	.	FZD3	CpG:_99_Shelf_N		243	0.015776	0.23568	8.9882e-16	1.756e-09		1	0.612283	3.37563e-43	0.37489
chr8:28652026-28652060	2	GT	18	7	27,26,24,23,22,19,18	18	18	18	23	27	.	.	EXTL3-AS1	46343	.		cg05141217	chr8:28633861	-18182	.	.	FZD3	.		242	0.097356	0.49463	1.9735e-37	3.85557e-31		1	0.796756	1.73701e-97	0.63482
chr8:28635716-28635744	2	AC	15	14	28,27,26,25,24,23,22,21,17,16,15,14,13,12	12	15	15	17	28	.	.	FZD3	61449	.		cg23665710	chr8:28619160	-16570	.	.	FZD3	CpG:_99_Shelf_N		243	0.008962	0.2085	6.4201e-14	1.25428e-07		1	0.665477	6.68628e-56	0.44286
chr8:28635716-28635744	2	AC	15	14	28,27,26,25,24,23,22,21,17,16,15,14,13,12	12	15	15	17	28	.	.	FZD3	61449	.		cg05141217	chr8:28633861	-1869	.	.	FZD3	.		242	0.073049	0.75764	8.0796e-76	1.57849e-69		1	0.935318	2.8205e-209	0.87482
chr8:28610216-28610244	2	GT	15	13	26,25,24,23,22,21,20,19,18,17,16,15,14	14	15	15	19	26	.	.	FZD3	35949	.		cg23665710	chr8:28619160	8930	.	.	FZD3	CpG:_99_Shelf_N		243	0.017741	0.24506	1.9908e-16	3.88937e-10		1	0.680632	1.29227e-59	0.46326
chr8:28610216-28610244	2	GT	15	13	26,25,24,23,22,21,20,19,18,17,16,15,14	14	15	15	19	26	.	.	FZD3	35949	.		cg05141217	chr8:28633861	23631	.	.	FZD3	.		242	0.097448	0.41224	1.6037e-29	3.1331e-23		1	0.849641	5.79192e-127	0.72189
chr8:27803550-27803578	2	AC	15	7	20,19,18,17,16,15,14	14	16	16	17	20	.	ESCO2	ESCO2	0	ESCO2_3utr		cg09039475	chr8:27772075	-31489	CCDC25	CCDC25	CCDC25	CpG:_54_Shore_N		244	-0.039428	0.18984	1.0001e-12	1.95387e-06		1	-0.489326	1.70469e-23	0.23944
chr8:27803550-27803578	2	AC	15	7	20,19,18,17,16,15,14	14	16	16	17	20	.	ESCO2	ESCO2	0	ESCO2_3utr		cg03651525	chr8:27772921	-30643	CCDC25,ESCO2	.	CCDC25	CpG:_45_Shore_N,CpG:_54_Shore_S		244	-0.088622	0.23763	5.7283e-16	1.11912e-09		1	-0.597846	8.75708e-41	0.35742
chr8:27774167-27774193	4	ATTT	7	4	9,8,7,6	6	6	6	7	9	CCDC25,ESCO2	.	ESCO2	361	.		cg04425710	chr8:27773403	-777	CCDC25,ESCO2	.	CCDC25	CpG:_45_Shore_N,CpG:_54_Shore_S		245	0.051068	0.16326	4.8776e-11	9.52922e-05		1	0.400999	1.7495e-13	0.1608
chr8:27774167-27774193	4	ATTT	7	4	9,8,7,6	6	6	6	7	9	CCDC25,ESCO2	.	ESCO2	361	.		cg09473948	chr8:27773631	-549	CCDC25,ESCO2	.	ESCO2	CpG:_45_Shore_N,CpG:_54_Shore_S		245	0.022487	0.19886	2.256e-13	4.40748e-07		1	0.549409	1.34606e-32	0.30185
chr8:27774167-27774193	4	ATTT	7	4	9,8,7,6	6	6	6	7	9	CCDC25,ESCO2	.	ESCO2	361	.		cg12564175	chr8:27773469	-711	CCDC25,ESCO2	.	CCDC25	CpG:_45_Shore_N,CpG:_54_Shore_S		244	0.026926	0.28963	1.0091e-19	1.97145e-13		1	0.388986	2.3648e-12	0.15131
chr8:27774167-27774193	4	ATTT	7	4	9,8,7,6	6	6	6	7	9	CCDC25,ESCO2	.	ESCO2	361	.		cg25944311	chr8:27773621	-559	CCDC25,ESCO2	.	ESCO2	CpG:_45_Shore_N,CpG:_54_Shore_S		245	0.026326	0.29587	2.875e-20	5.6168e-14		1	0.655103	2.15164e-53	0.42916
chr8:27774167-27774193	4	ATTT	7	4	9,8,7,6	6	6	6	7	9	CCDC25,ESCO2	.	ESCO2	361	.		cg13943716	chr8:27775375	1195	ESCO2	ESCO2	ESCO2	CpG:_45_Shore_S		245	0.074545	0.33924	1.1902e-23	2.32526e-17		1	0.576871	2.77783e-37	0.33278
chr8:27738602-27738625	2	GT	12	6	16,15,14,13,12,10	10	10	12	12	16	.	CCDC25	CCDC25	0	CCDC25_intron		cg25944311	chr8:27773621	35007.5	CCDC25,ESCO2	.	ESCO2	CpG:_45_Shore_N,CpG:_54_Shore_S		245	0.009209	0.17997	4.0154e-12	7.84477e-06		1	0.489347	8.50417e-24	0.23946
chr8:27738602-27738625	2	GT	12	6	16,15,14,13,12,10	10	10	12	12	16	.	CCDC25	CCDC25	0	CCDC25_intron		cg13943716	chr8:27775375	36761.5	ESCO2	ESCO2	ESCO2	CpG:_45_Shore_S		245	0.029063	0.25632	2.3588e-17	4.60832e-11		1	0.492138	3.5888e-24	0.2422
chr8:27593373-27593427	5	ACGTT	11	12	18,16,15,14,13,12,11,10,9,8,7,5	5	9	10	12	18	.	.	CLU	3490	.		cg13879655	chr8:27593260	-140	.	.	CLU	CpG:_27_Shore_S		244	-0.019847	0.27988	5.3401e-19	1.04328e-12		1	-0.530368	4.34105e-29	0.28129
chr8:27593373-27593427	5	ACGTT	11	12	18,16,15,14,13,12,11,10,9,8,7,5	5	9	10	12	18	.	.	CLU	3490	.		cg04803944	chr8:27593327	-73	.	.	CLU	CpG:_27_Shore_S		244	-0.026795	0.46105	2.4743e-34	4.83397e-28		1	-0.640601	1.35202e-46	0.41037
chr8:27487344-27487433	5	CTCTT	18	10	23,22,21,20,19,18,17,16,15,14	14	17	18	19	23	.	.	EPHX2	3710	.		cg25399743	chr8:27490660	3271.5	EPHX2	.	EPHX2	CpG:_29_Shore_N		193	-0.0388	0.22657	2.6311e-12	5.1403e-06		1	-0.497061	1.02876e-10	0.24707
chr8:27479236-27479288	2	CT/AC	27	8	31,30,29,28,27,25,24,22	22	27	27	27	31	CHRNA2	CHRNA2	CHRNA2	0	CHRNA2_5utr		cg02953306	chr8:27479109	-153	CHRNA2	CHRNA2	CHRNA2	.		225	0.025789	0.16661	1.9143e-10	0.000373991		1	0.471953	1.33475e-20	0.22274
chr8:27479236-27479288	2	CT/AC	27	8	31,30,29,28,27,25,24,22	22	27	27	27	31	CHRNA2	CHRNA2	CHRNA2	0	CHRNA2_5utr		cg00421144	chr8:27479158	-104	CHRNA2	CHRNA2	CHRNA2	.		243	0.029994	0.22721	3.4494e-15	6.73899e-09		1	0.507238	3.40441e-26	0.25729
chr8:27421279-27421327	4	ATTT	13	9	15,14,13,12,11,10,9,7,5	5	7	12	12	15	.	PTK2B	PTK2B	0	PTK2B_intron		cg00402801	chr8:27391025	-30278	.	PTK2B	PTK2B	.		245	-0.04784	0.48208	1.4064e-36	2.74764e-30		1	-0.789132	1.28969e-94	0.62273
chr8:27403750-27403787	3	CTG/CCT	14	3	15,14,13	13	13	13	14	15	.	PTK2B	PTK2B	0	PTK2B_intron		cg18462755	chr8:27395270	-8498.5	.	PTK2B	PTK2B	.		240	-0.0902	0.35977	7.6973e-25	1.5038e-18		1	-0.42936	1.75705e-16	0.18435
chr8:27403750-27403787	3	CTG/CCT	14	3	15,14,13	13	13	13	14	15	.	PTK2B	PTK2B	0	PTK2B_intron		cg00402801	chr8:27391025	-12743.5	.	PTK2B	PTK2B	.		240	0.234294	0.554	1.2893e-43	2.51887e-37		1	0.814138	3.32631e-107	0.66282
chr8:27371546-27371562	2	AT	9	5	14,12,11,10,9	9	9	9	11	14	.	PTK2B	PTK2B	0	PTK2B_intron		cg00402801	chr8:27391025	19471	.	PTK2B	PTK2B	.		245	0.105961	0.35429	7.0839e-25	1.38396e-18		1	0.656849	8.27574e-54	0.43145
chr8:25485181-25485211	3	AAT	11	6	14,13,12,11,10,9	9	9	10	12	14	.	CDCA2	CDCA2	0	CDCA2_intron		cg05005217	chr8:25460122	-25074	CDCA2,KCTD9	CDCA2	CDCA2	CpG:_128_Shore_S		245	-0.013335	0.20769	5.7477e-14	1.12291e-07		1	-0.572381	1.28e-35	0.32762
chr8:25471358-25471374	3	CTT	6	5	11,10,9,8,6	6	8	8	10	11	.	CDCA2	CDCA2	0	CDCA2_intron		cg05005217	chr8:25460122	-11244	CDCA2,KCTD9	CDCA2	CDCA2	CpG:_128_Shore_S		245	-0.018062	0.21227	2.8102e-14	5.4902e-08		1	-0.586558	2.06766e-39	0.34405
chr8:25468533-25468574	2	GT	23	8	30,29,28,27,26,25,24,23	23	25	28	28	30	.	CDCA2	CDCA2	0	CDCA2_intron		cg05005217	chr8:25460122	-8431.5	CDCA2,KCTD9	CDCA2	CDCA2	CpG:_128_Shore_S		245	0.010654	0.16557	3.4638e-11	6.76712e-05		1	0.546416	3.43866e-32	0.29857
chr8:25426232-25426264	2	AC	18	8	22,21,20,19,18,17,16,15	15	16	16	20	22	GNRH1	.	GNRH1	1193	.		cg05005217	chr8:25460122	33874	CDCA2,KCTD9	CDCA2	CDCA2	CpG:_128_Shore_S		245	-0.009862	0.24924	7.556e-17	1.47619e-10		1	-0.594458	4.776e-40	0.35338
chr8:2541228-2541333	2	AT	43	9	58,57,56,55,43,42,41,27,26	26	43	55	56	58	.	LOC101927815	LOC101927815	0	LOC101927815_intron		cg14356225	chr8:2526468	-14792.5	.	.	LOC101927815	.		240	-0.007257	0.21232	5.1141e-14	9.99126e-08		1	-0.415837	2.7653e-14	0.17292
chr8:2494145-2494164	3	ATT	7	3	9,8,7	7	7	7	7	9	.	.	LOC101927815	35939	.		cg16165967	chr8:2481770	-12390.5	.	.	LOC101927815	CpG:_20_Shore_S		243	-0.061408	0.17167	1.6915e-11	3.30463e-05		1	-0.370513	1.63268e-10	0.13728
chr8:2494145-2494164	3	ATT	7	3	9,8,7	7	7	7	7	9	.	.	LOC101927815	35939	.		cg02362850	chr8:2482764	-11396.5	.	.	LOC101927815	CpG:_20_Shore_S		244	0.046843	0.1851	2.0506e-12	4.0062e-06		1	0.317962	3.47175e-06	0.1011
chr8:2489841-2489876	4	ATTT	10	5	14,13,12,11,10	10	10	10	11	14	.	.	LOC101927815	40227	.		cg16165967	chr8:2481770	-8094.5	.	.	LOC101927815	CpG:_20_Shore_S		244	-0.020727	0.1553	1.7214e-10	0.000336305		1	-0.388652	3.00254e-12	0.15105
chr8:2489841-2489876	4	ATTT	10	5	14,13,12,11,10	10	10	10	11	14	.	.	LOC101927815	40227	.		cg02362850	chr8:2482764	-7100.5	.	.	LOC101927815	CpG:_20_Shore_S		245	0.01893	0.23876	4.1623e-16	8.13176e-10		1	0.351084	8.12286e-09	0.12326
chr8:24504024-24504076	5	AAAAT	11	7	14,13,12,11,10,9,8	8	8	11	11	14	.	ADAM7,LOC101929294,LOC101929315	LOC101929294,ADAM7,LOC101929315	0	ADAM7_intron,LOC101929294_intron,LOC101929315_intron		cg26826339	chr8:24508573	4523	.	ADAM7,LOC101929294,LOC101929315	LOC101929294	.		243	0.015825	0.38191	5.4709e-27	1.06883e-20		1	0.821693	5.39162e-113	0.67518
chr8:24499798-24499854	2	AC	30	11	32,31,30,29,28,27,26,25,24,23,22	22	26	29	30	32	.	ADAM7,LOC101929294,LOC101929315	LOC101929294,ADAM7,LOC101929315	0	ADAM7_intron,LOC101929294_intron,LOC101929315_intron		cg26826339	chr8:24508573	8747	.	ADAM7,LOC101929294,LOC101929315	LOC101929294	.		243	0.0074	0.18911	1.2442e-12	2.43076e-06		1	0.791391	3.16971e-96	0.6263
chr8:24498550-24498564	2	AT	8	4	11,10,9,8	8	8	8	10	11	.	ADAM7,LOC101929294,LOC101929315	LOC101929294,ADAM7,LOC101929315	0	ADAM7_intron,LOC101929294_intron,LOC101929315_intron		cg26826339	chr8:24508573	10016	.	ADAM7,LOC101929294,LOC101929315	LOC101929294	.		243	-0.0239	0.39192	7.5576e-28	1.47651e-21		1	-0.854512	4.49236e-130	0.73019
chr8:24460703-24460786	2	AT/GT/AT	43	3	43,42,41	41	41	42	43	43	.	ADAM7,LOC101929294	LOC101929294,ADAM7	0	ADAM7_intron,LOC101929294_intron		cg17897391	chr8:24439590	-21154.5	ADAM7	LOC101929294	LOC101929294	.		245	0.075245	0.20273	1.2413e-13	2.42509e-07		1	0.434385	3.22295e-17	0.18869
chr8:23853036-23853069	4	AAAG	9	8	16,13,12,11,10,9,8,7	7	9	9	10	16	STC1	STC1	STC1	0	STC1_intron		cg16688533	chr8:23855503	2450.5	STC1	.	STC1	.		244	-0.067854	0.17384	1.1124e-11	2.17326e-05		1	-0.503875	1.17099e-25	0.25389
chr8:23752574-23752610	2	AC	19	9	23,22,21,20,19,18,17,16,15	15	19	20	21	23	.	.	NKX2-6	45977	.		cg21590108	chr8:23751544	-1048	.	.	NKX2-6	.		148	0.013844	0.3121	1.6035e-13	3.13271e-07		1	0.605021	4.70279e-23	0.36605
chr8:23752574-23752610	2	AC	19	9	23,22,21,20,19,18,17,16,15	15	19	20	21	23	.	.	NKX2-6	45977	.		cg03324961	chr8:23748088	-4504	.	.	NKX2-6	.		244	0.027841	0.22679	3.2343e-15	6.31875e-09		1	0.414849	6.22021e-15	0.1721
chr8:23752574-23752610	2	AC	19	9	23,22,21,20,19,18,17,16,15	15	19	20	21	23	.	.	NKX2-6	45977	.		cg04899715	chr8:23751911	-681	.	.	NKX2-6	.		243	0.053922	0.55396	3.8676e-44	7.55601e-38		1	0.717726	2.16397e-70	0.51513
chr8:23330333-23330394	5	AAAAC	13	4	14,13,12,11	11	12	12	13	14	.	LOXL2	LOXL2	0	LOXL2_intron		cg12060669	chr8:23321770	-8593.5	.	LOXL2	LOXL2	.		245	0.428009	0.58785	1.1286e-48	2.20491e-42		1	0.798373	9.51716e-100	0.6374
chr8:23328710-23328757	2	GT	24	18	39,38,37,36,35,34,33,31,30,29,28,27,26,25,24,23,21,19	19	24	26	28	39	.	LOXL2	LOXL2	0	LOXL2_intron		cg12060669	chr8:23321770	-6963.5	.	LOXL2	LOXL2	.		245	-0.058399	0.31278	1.459e-21	2.8504e-15		1	-0.566798	2.41922e-35	0.32126
chr8:23318426-23318461	2	AC	20	12	24,23,22,21,20,19,18,17,16,15,14,8	8	17	17	20	24	.	LOXL2	LOXL2	0	LOXL2_intron		cg12060669	chr8:23321770	3326.5	.	LOXL2	LOXL2	.		244	0.07468	0.37721	1.0814e-26	2.1127e-20		1	0.636585	2.85984e-49	0.40524
chr8:23215518-23215562	4	AAAT/AAAC	11	3	11,10,9	9	10	10	11	11	.	TNFRSF10A	TNFRSF10A	0	TNFRSF10A_intron		cg26530341	chr8:23225840	10300	LOC389641,TNFRSF10A	LOC389641	LOC389641	CpG:_82_Shore_S		245	-0.05245	0.14891	4.0245e-10	0.000786254		1	-0.299568	4.06329e-05	0.089741
chr8:2317645-2317680	6	ATTTTT	7	3	7,6,5	5	6	7	7	7	.	.	LOC101927815	123487	.		cg11900328	chr8:2317279	-383.5	.	.	LOC101927815	.		207	0.138373	0.17543	3.3685e-10	0.000658094		0	-0.380197	5.57797e-06	0.14455
chr8:23093586-23093639	2	AC	27	15	28,27,26,25,24,23,22,21,20,19,18,17,16,15,12	12	22	23	24	28	.	LOC254896	LOC254896	0	LOC254896_intron		cg06781213	chr8:23083857	-9755.5	LOC254896	.	LOC286059	.		244	0.005135	0.15008	3.6842e-10	0.000719771		1	0.36885	1.70264e-10	0.13605
chr8:2274004-2274035	2	AT	18	9	26,25,21,20,19,18,17,16,13	13	18	18	20.75	26	.	.	MYOM2	126669	.		cg24320225	chr8:2292250	18241.5	.	.	MYOM2	CpG:_25_Shelf_N		212	-0.019415	0.31061	1.068e-18	2.08652e-12		1	-0.552838	4.8586e-15	0.30563
chr8:22707938-22707995	2	GT	30	14	34,33,32,31,30,29,28,27,26,25,24,23,22,21	21	23	24	29	34	.	.	PEBP4	5256	.		cg03720745	chr8:22703932	-4034.5	.	.	PEBP4	CpG:_37_Shore_S		245	0.014915	0.20798	5.4877e-14	1.07212e-07		1	0.457231	6.64361e-19	0.20906
chr8:22305168-22305212	4	ATTT	11	6	15,14,13,12,11,10	10	11	12	13	15	.	PIWIL2	PIWIL2	0	PIWIL2_intron		cg02463440	chr8:22275419	-29771	LOC100507071,PIWIL2	PIWIL2	PIWIL2	CpG:_47_Island		244	0.02155	0.20334	1.2665e-13	2.47432e-07		1	0.367546	1.91719e-10	0.13509
chr8:22305168-22305212	4	ATTT	11	6	15,14,13,12,11,10	10	11	12	13	15	.	PIWIL2	PIWIL2	0	PIWIL2_intron		cg09517075	chr8:22275491	-29699	LOC100507071,PIWIL2	PIWIL2	PIWIL2	CpG:_47_Island		245	0.024455	0.23285	1.0781e-15	2.10625e-09		1	0.425476	3.80236e-16	0.18103
chr8:22305168-22305212	4	ATTT	11	6	15,14,13,12,11,10	10	11	12	13	15	.	PIWIL2	PIWIL2	0	PIWIL2_intron		cg05079448	chr8:22287588	-17602	.	PIWIL2	PIWIL2	.		245	-0.015574	0.24122	2.7922e-16	5.45504e-10		1	-0.361026	8.28729e-10	0.13034
chr8:22305168-22305212	4	ATTT	11	6	15,14,13,12,11,10	10	11	12	13	15	.	PIWIL2	PIWIL2	0	PIWIL2_intron		cg10137597	chr8:22275201	-29989	LOC100507071,PIWIL2	.	LOC100507071	CpG:_47_Shore_N		245	0.03657	0.24722	1.0527e-16	2.05663e-10		1	0.433751	5.19294e-17	0.18814
chr8:22305168-22305212	4	ATTT	11	6	15,14,13,12,11,10	10	11	12	13	15	.	PIWIL2	PIWIL2	0	PIWIL2_intron		cg26039829	chr8:22275413	-29777	LOC100507071,PIWIL2	PIWIL2	PIWIL2	CpG:_47_Island		245	0.035163	0.26439	6.1771e-18	1.2068e-11		1	0.425382	3.89201e-16	0.18095
chr8:22305168-22305212	4	ATTT	11	6	15,14,13,12,11,10	10	11	12	13	15	.	PIWIL2	PIWIL2	0	PIWIL2_intron		cg07298985	chr8:22275563	-29627	LOC100507071,PIWIL2	PIWIL2	PIWIL2	CpG:_47_Island		245	0.038655	0.28321	2.5589e-19	4.99925e-13		1	0.378589	1.90756e-11	0.14333
chr8:22305168-22305212	4	ATTT	11	6	15,14,13,12,11,10	10	11	12	13	15	.	PIWIL2	PIWIL2	0	PIWIL2_intron		cg02788857	chr8:22275446	-29744	LOC100507071,PIWIL2	PIWIL2	PIWIL2	CpG:_47_Island		242	0.032189	0.29276	8.3554e-20	1.63237e-13		1	0.454456	1.91615e-19	0.20653
chr8:22305168-22305212	4	ATTT	11	6	15,14,13,12,11,10	10	11	12	13	15	.	PIWIL2	PIWIL2	0	PIWIL2_intron		cg18135555	chr8:22275479	-29711	LOC100507071,PIWIL2	PIWIL2	PIWIL2	CpG:_47_Island		243	0.054765	0.33316	5.4996e-23	1.07444e-16		1	0.539138	4.19385e-31	0.29067
chr8:22210432-22210487	2	CT/AC	30	8	39,38,37,36,35,30,29,28	28	30	30	37	39	.	BMP1	BMP1	0	BMP1_intron		cg19750024	chr8:22210676	216.5	.	BMP1	BMP1	.		241	-0.009255	0.33732	3.8957e-23	7.61091e-17		1	-0.607478	1.23958e-38	0.36903
chr8:22074253-22074287	4	GTTT	9	3	11,10,9	9	10	10	10	11	.	DMTN	DMTN	0	DMTN_intron		cg10296516	chr8:22087475	13205	FAM160B2	.	FAM160B2	CpG:_25_Shore_N		239	-0.151357	0.301	3.4791e-20	6.79701e-14		1	-0.527523	3.64478e-28	0.27828
chr8:22071078-22071113	4	ATTT	9	4	12,9,8,7	7	7	7	7	12	.	DMTN	DMTN	0	DMTN_intron		cg10296516	chr8:22087475	16379.5	FAM160B2	.	FAM160B2	CpG:_25_Shore_N		239	0.099987	0.22303	1.113e-14	2.17443e-08		1	0.468305	6.07614e-20	0.21931
chr8:22060384-22060432	2	CT	25	6	28,27,26,25,24,23	23	25	25	25	28	.	DMTN	DMTN	0	DMTN_intron		cg10296516	chr8:22087475	27067	FAM160B2	.	FAM160B2	CpG:_25_Shore_N		239	0.065935	0.23401	2.0161e-15	3.93879e-09		1	0.452504	2.07471e-18	0.20476
chr8:21970370-21970392	2	AC	12	6	16,15,14,13,12,11	11	12	12	14	16	.	XPO7	XPO7	0	XPO7_intron		cg13359135	chr8:22002884	32503	.	XPO7	XPO7	.		243	0.057187	0.28354	3.3929e-19	6.62861e-13		1	0.784022	3.88105e-94	0.61469
chr8:21970370-21970392	2	AC	12	6	16,15,14,13,12,11	11	12	12	14	16	.	XPO7	XPO7	0	XPO7_intron		cg22859405	chr8:21978120	7739	.	XPO7	XPO7	.		245	0.018433	0.3047	6.1152e-21	1.19471e-14		1	0.562672	4.70259e-35	0.3166
chr8:21914216-21914254	2	AC/AG	20	4	22,21,20,19	19	19	20	20	22	DOK2	.	DOK2	527	.		cg16476235	chr8:21914157	-78	DOK2	.	DOK2	CpG:_35_Shore_S		244	0.06216	0.2036	1.217e-13	2.37762e-07		1	0.511253	4.26041e-27	0.26138
chr8:2137565-2137582	2	GT	11	7	17,16,15,13,12,11,10	10	11	11	11	17	.	MYOM2	MYOM2	0	MYOM2_intron		cg08174789	chr8:2130124	-7448.5	.	MYOM2	MYOM2	CpG:_31_Island		199	-0.069467	0.25432	3.1038e-14	6.0638e-08		1	-0.353001	4.57673e-08	0.12461
chr8:20782459-20782523	2	GT/AG	33	14	46,44,43,42,41,39,38,37,36,35,34,33,32,31	31	33	34	36	46	.	.	SNORD3F	167534	.		cg20305683	chr8:20789925	7434	.	.	LOC102467222	.		245	-0.07242	0.21933	9.2602e-15	1.80914e-08		1	-0.541932	8.94714e-32	0.29369
chr8:20375275-20375337	4	ATCC	16	5	18,17,16,15,14	14	16	16	17	18	.	.	LZTS1	71313	.		cg20198337	chr8:20350046	-25260	.	.	LZTS1-AS1	.		243	0.033227	0.15027	3.8955e-10	0.000761052		1	0.289897	0.000203987	0.08404
chr8:20371552-20371572	2	AT	13	4	15,14,13,12	12	12	13	13	15	.	.	LZTS1	67590	.		cg20198337	chr8:20350046	-21516	.	.	LZTS1-AS1	.		243	-0.052152	0.14943	4.403e-10	0.000860201		1	-0.353963	2.71519e-09	0.12529
chr8:20196737-20196762	3	AAG	10	4	12,11,10,9	9	10	10	10	12	ATP6V1B2	.	ATP6V1B2	619	.		cg04395689	chr8:20196861	111.5	ATP6V1B2	.	ATP6V1B2	CpG:_49_Shore_N		241	0.073462	0.18021	5.8097e-12	1.13502e-05		0	0	0	0
chr8:20077343-20077385	2	AT	22	20	30,29,28,27,26,25,24,23,22,21,20,19,18,17,16,15,14,13,12,11	11	13	13	22	30	.	.	SLC18A1	67470	.		cg10350306	chr8:20078080	716	.	.	SLC18A1	.		230	0.005452	0.20125	8.6756e-13	1.69493e-06		1	0.403621	1.07329e-10	0.16291
chr8:1993923-1993959	2	AC	20	17	32,31,30,29,28,27,26,25,24,23,22,21,20,19,18,17,13	13	20	22	26	32	.	KBTBD11	KBTBD11	0	KBTBD11_intron		cg17826006	chr8:2007030	13089	.	.	KBTBD11	CpG:_18_Shore_N		240	-0.005515	0.15471	2.6465e-10	0.000517039		1	-0.350742	1.20785e-08	0.12302
chr8:19668342-19668360	2	AC	10	5	13,12,11,10,6	6	10	10.5	12	13	.	CSGALNACT1	CSGALNACT1	0	CSGALNACT1_intron		cg00002190	chr8:19697522	29171	.	.	CSGALNACT1	.		243	0.028711	0.18456	2.4676e-12	4.82088e-06		1	0.308587	1.20227e-05	0.095226
chr8:19664627-19664681	2	AC	29	7	30,29,28,27,25,24,23	23	28	29	29	30	.	CSGALNACT1	CSGALNACT1	0	CSGALNACT1_intron		cg00002190	chr8:19697522	32868	.	.	CSGALNACT1	.		244	0.04458	0.34296	7.3627e-24	1.43843e-17		1	0.417864	5.3926e-15	0.17461
chr8:19603048-19603088	2	AC	21	10	23,22,21,20,19,18,17,16,15,10	10	20	20	20	23	CSGALNACT1	CSGALNACT1	CSGALNACT1	0	CSGALNACT1_intron		cg04066265	chr8:19602732	-336	CSGALNACT1	CSGALNACT1	CSGALNACT1	CpG:_27_Shore_S		240	-0.010659	0.15379	3.0219e-10	0.00059038		1	-0.364033	8.73398e-09	0.13252
chr8:19603048-19603088	2	AC	21	10	23,22,21,20,19,18,17,16,15,10	10	20	20	20	23	CSGALNACT1	CSGALNACT1	CSGALNACT1	0	CSGALNACT1_intron		cg15232539	chr8:19602161	-907	CSGALNACT1	CSGALNACT1	CSGALNACT1	CpG:_27_Shore_N		236	-0.018822	0.21259	7.9817e-14	1.55936e-07		1	-0.516566	1.10399e-24	0.26684
chr8:19603048-19603088	2	AC	21	10	23,22,21,20,19,18,17,16,15,10	10	20	20	20	23	CSGALNACT1	CSGALNACT1	CSGALNACT1	0	CSGALNACT1_intron		cg17470251	chr8:19602485	-583	CSGALNACT1	CSGALNACT1	CSGALNACT1	CpG:_27_Island		235	-0.03488	0.22803	8.6782e-15	1.69543e-08		1	-0.522829	1.58906e-25	0.27335
chr8:19553903-19553926	2	AC	15	7	22,21,20,19,17,16,15	15	15	15	16	22	.	CSGALNACT1	CSGALNACT1	0	CSGALNACT1_intron		cg02854313	chr8:19551512	-2402.5	.	CSGALNACT1	CSGALNACT1	.		241	0.045027	0.25981	2.4336e-17	4.75445e-11		1	0.411327	1.91073e-14	0.16919
chr8:19553583-19553639	2	AT	31	15	46,45,44,43,42,41,40,39,38,37,35,33,32,31,30	30	31	31	39	46	.	CSGALNACT1	CSGALNACT1	0	CSGALNACT1_intron		cg03030292	chr8:19540725	-12886	.	CSGALNACT1	CSGALNACT1	.		240	0.004541	0.15014	5.0981e-10	0.000996001		0	0	0	0
chr8:19553583-19553639	2	AT	31	15	46,45,44,43,42,41,40,39,38,37,35,33,32,31,30	30	31	31	39	46	.	CSGALNACT1	CSGALNACT1	0	CSGALNACT1_intron		cg02854313	chr8:19551512	-2099	.	CSGALNACT1	CSGALNACT1	.		238	0.01832	0.33559	9.9013e-23	1.93439e-16		1	0.515422	2.91602e-24	0.26566
chr8:19530306-19530346	2	AC	21	9	22,21,20,19,18,15,14,12,11	11	15	21	21	22	.	CSGALNACT1	CSGALNACT1	0	CSGALNACT1_intron		cg02854313	chr8:19551512	21186	.	CSGALNACT1	CSGALNACT1	.		241	-0.037282	0.45185	4.8017e-33	9.38094e-27		1	-0.597846	7.00124e-41	0.35742
chr8:19530223-19530260	5	AAAAC	8	5	9,8,7,6,5	5	6	8	8	9	.	CSGALNACT1	CSGALNACT1	0	CSGALNACT1_intron		cg02854313	chr8:19551512	21270.5	.	CSGALNACT1	CSGALNACT1	.		241	-0.127201	0.48181	5.6256e-36	1.09906e-29		1	-0.626418	2.18609e-47	0.3924
chr8:19514476-19514511	2	AT	21	22	35,32,31,30,29,28,27,26,25,24,23,22,21,20,17,16,14,13,12,11,9,8	8	20	21	25	35	.	CSGALNACT1	CSGALNACT1	0	CSGALNACT1_intron		cg11625986	chr8:19515379	885.5	.	CSGALNACT1	CSGALNACT1	.		215	-0.007675	0.2614	1.0208e-15	1.99431e-09		1	-0.661362	1.87062e-36	0.4374
chr8:1949019-1949042	2	GT	13	4	15,14,13,12	12	12	12	13	15	.	ARHGEF10	ARHGEF10	0	ARHGEF10_intron		cg05488778	chr8:1950272	1241.5	.	ARHGEF10	ARHGEF10	.		242	0.046567	0.16823	3.0949e-11	6.04641e-05		1	0.466476	5.81502e-21	0.2176
chr8:1949019-1949042	2	GT	13	4	15,14,13,12	12	12	12	13	15	.	ARHGEF10	ARHGEF10	0	ARHGEF10_intron		cg24833027	chr8:1949803	772.5	.	ARHGEF10	ARHGEF10	CpG:_26_Shelf_S		245	0.170684	0.30616	4.7299e-21	9.24066e-15		1	0.624692	5.12443e-47	0.39024
chr8:19488352-19488415	2	AT	32	16	34,33,32,31,30,29,28,27,26,25,24,23,22,21,20,19	19	22	26	29	34	.	CSGALNACT1	CSGALNACT1	0	CSGALNACT1_intron		cg02988816	chr8:19475763	-12620.5	.	CSGALNACT1	CSGALNACT1	.		244	-0.010236	0.20673	7.5034e-14	1.46592e-07		1	-0.449767	1.84373e-16	0.20229
chr8:19488352-19488415	2	AT	32	16	34,33,32,31,30,29,28,27,26,25,24,23,22,21,20,19	19	22	26	29	34	.	CSGALNACT1	CSGALNACT1	0	CSGALNACT1_intron		cg23998629	chr8:19495225	6841.5	.	CSGALNACT1	CSGALNACT1	.		242	0.008209	0.23754	7.6616e-16	1.49682e-09		1	0.608712	1.49225e-38	0.37053
chr8:19488352-19488415	2	AT	32	16	34,33,32,31,30,29,28,27,26,25,24,23,22,21,20,19	19	22	26	29	34	.	CSGALNACT1	CSGALNACT1	0	CSGALNACT1_intron		cg15923359	chr8:19475848	-12535.5	.	CSGALNACT1	CSGALNACT1	.		244	-0.01659	0.29958	1.8029e-20	3.52227e-14		1	-0.559544	2.44897e-30	0.31309
chr8:19071711-19071728	3	CTT	7	3	9,8,7	7	7	8	8	9	.	.	PSD3	58009	.		cg19414122	chr8:19039121	-32598.5	.	.	PSD3	.		245	-0.116491	0.27183	1.772e-18	3.4619e-12		1	-0.37506	5.07725e-11	0.14067
chr8:19023394-19023446	4	ATTT	13	10	17,16,15,14,13,12,11,10,9,8	8	11	12	14	17	.	.	PSD3	9692	.		cg19414122	chr8:19039121	15701	.	.	PSD3	.		245	0.028716	0.21809	1.1261e-14	2.20003e-08		1	0.559375	5.31704e-34	0.3129
chr8:18991338-18991401	2	AC	32	17	35,34,33,32,31,30,28,26,25,24,23,22,21,20,19,18,17	17	22	32	34	35	.	PSD3	PSD3	0	PSD3_intron		cg19414122	chr8:19039121	47751.5	.	.	PSD3	.		243	0.009478	0.20481	1.1347e-13	2.21683e-07		1	0.5031	2.70247e-25	0.25311
chr8:18955757-18955784	4	ATTT	7	4	10,9,8,7	7	8	8	8	10	.	PSD3	PSD3	0	PSD3_intron		cg02660271	chr8:18957916	2145.5	.	PSD3	PSD3	.		240	-0.102837	0.22552	6.6463e-15	1.29847e-08		1	-0.614671	2.12541e-44	0.37782
chr8:18953304-18953333	2	GT	15	3	16,15,14	14	14	15	15	16	.	PSD3	PSD3	0	PSD3_intron		cg02660271	chr8:18957916	4597.5	.	PSD3	PSD3	.		241	0.109225	0.16009	1.1136e-10	0.000217561		1	0.648344	3.60564e-52	0.42035
chr8:18945068-18945100	2	AC	17	3	19,18,17	17	17	17	18	19	.	PSD3	PSD3	0	PSD3_intron		cg02660271	chr8:18957916	12832	.	PSD3	PSD3	.		241	-0.083752	0.18738	1.9956e-12	3.89874e-06		1	-0.729774	2.41531e-74	0.53257
chr8:18913069-18913124	2	AC	29	10	33,32,31,30,29,28,27,26,25,24	24	28	29	30	33	.	PSD3	PSD3	0	PSD3_intron		cg15717081	chr8:18911451	-1645.5	.	PSD3	PSD3	.		244	-0.026737	0.19816	2.8086e-13	5.48708e-07		1	-0.360153	3.75675e-09	0.12971
chr8:18882208-18882237	4	AAAC	8	3	10,9,8	8	8	8	8	10	.	PSD3	PSD3	0	PSD3_intron		cg15717081	chr8:18911451	29228.5	.	PSD3	PSD3	.		245	0.109126	0.16451	4.0569e-11	7.92584e-05		1	0.366279	2.30647e-10	0.13416
chr8:1866405-1866450	2	AT/AC	23	5	24,23,22,21,17	17	22	22	22.75	24	.	ARHGEF10	ARHGEF10	0	ARHGEF10_intron		cg08425050	chr8:1868600	2172.5	.	ARHGEF10	ARHGEF10	.		245	-0.030654	0.15215	2.5063e-10	0.000489648		1	-0.302255	2.63395e-05	0.091358
chr8:1866405-1866450	2	AT/AC	23	5	24,23,22,21,17	17	22	22	22.75	24	.	ARHGEF10	ARHGEF10	0	ARHGEF10_intron		cg12847536	chr8:1874020	7592.5	.	ARHGEF10	ARHGEF10	CpG:_30_Shore_S		245	-0.09888	0.19796	2.5912e-13	5.06235e-07		1	-0.456979	7.5368e-20	0.20883
chr8:1826332-1826454	2	GT	62	4	62,60,55,54	54	54	62	62	62	.	ARHGEF10	ARHGEF10	0	ARHGEF10_intron		cg11539066	chr8:1816452	-9941	MIR596	.	MIR596	CpG:_75_Island		234	-0.019166	0.17372	3.0013e-11	5.86355e-05		1	-0.394221	2.08136e-11	0.15541
chr8:1826332-1826454	2	GT	62	4	62,60,55,54	54	54	62	62	62	.	ARHGEF10	ARHGEF10	0	ARHGEF10_intron		cg06463230	chr8:1831459	5066	.	ARHGEF10	ARHGEF10	CpG:_16_Island		184	0.009401	0.38738	4.0532e-21	7.91862e-15		1	0.686578	6.17323e-60	0.47139
chr8:18065883-18065911	2	GT	17	8	22,21,20,19,18,17,16,13	13	17	18	19	22	.	ASAH1	ASAH1	0	ASAH1_intron		cg04390231	chr8:18068292	2395	.	ASAH1	ASAH1	.		245	-0.019295	0.19858	2.3539e-13	4.59874e-07		1	-0.680316	7.42072e-59	0.46283
chr8:1798022-1798054	2	GT	17	7	23,22,20,19,18,17,16	16	19	19	19	23	.	.	MIR3674	3071	.		cg00108228	chr8:1802594	4556	MIR3674	.	MIR3674	.		244	-0.05468	0.1895	1.0539e-12	2.05897e-06		1	-0.565394	2.3513e-35	0.31967
chr8:1798022-1798054	2	GT	17	7	23,22,20,19,18,17,16	16	19	19	19	23	.	.	MIR3674	3071	.		cg22756942	chr8:1798194	156	.	.	MIR3674	.		245	0.037341	0.19848	2.3907e-13	4.67064e-07		1	0.338792	5.19822e-08	0.11478
chr8:17900847-17900956	4	CTTT	28	5	33,32,29,28,27	27	28	28	28	33	.	.	FGL1	5310	.		cg19557333	chr8:17905579	4677.5	.	.	FGL1	.		141	0.047728	0.31192	6.1959e-13	1.21047e-06		1	0.530952	1.38662e-13	0.28191
chr8:17679483-17679518	4	ATTT	9	4	10,9,8,7	7	7	7	9	10	.	MTUS1	MTUS1	0	MTUS1_intron		cg27532721	chr8:17676593	-2907.5	.	MTUS1	MTUS1	.		242	-0.138843	0.48152	4.322e-36	8.44376e-30		1	-0.692965	1.72657e-62	0.4802
chr8:17679483-17679518	4	ATTT	9	4	10,9,8,7	7	7	7	9	10	.	MTUS1	MTUS1	0	MTUS1_intron		cg01003893	chr8:17676394	-3106.5	.	MTUS1	MTUS1	.		220	-0.164952	0.60592	5.7377e-46	1.12096e-39		1	-0.755017	1.66603e-79	0.57005
chr8:17679483-17679518	4	ATTT	9	4	10,9,8,7	7	7	7	9	10	.	MTUS1	MTUS1	0	MTUS1_intron		cg13967339	chr8:17676160	-3340.5	.	MTUS1	MTUS1	.		243	-0.183763	0.64851	1.218e-56	2.37957e-50		1	-0.839732	1.94358e-120	0.70515
chr8:17679200-17679214	2	AC	11	3	11,10,9	9	9	9	11	11	.	MTUS1	MTUS1	0	MTUS1_intron		cg27532721	chr8:17676593	-2614	.	MTUS1	MTUS1	.		243	-0.141833	0.50411	1.418e-38	2.7703e-32		1	-0.596615	2.90643e-40	0.35595
chr8:17679200-17679214	2	AC	11	3	11,10,9	9	9	9	11	11	.	MTUS1	MTUS1	0	MTUS1_intron		cg01003893	chr8:17676394	-2813	.	MTUS1	MTUS1	.		221	-0.166281	0.62329	2.5449e-48	4.97189e-42		1	-0.625348	1.46361e-44	0.39106
chr8:17679200-17679214	2	AC	11	3	11,10,9	9	9	9	11	11	.	MTUS1	MTUS1	0	MTUS1_intron		cg13967339	chr8:17676160	-3047	.	MTUS1	MTUS1	.		244	-0.186882	0.67241	1.4107e-60	2.75604e-54		1	-0.690348	2.35032e-61	0.47658
chr8:17374621-17374653	4	AAAT	8	3	9,8,7	7	8	8	8	9	.	MTMR7	MTMR7	0	MTMR7_intron		cg15638882	chr8:17354668	-19969	.	MTMR7	MTMR7	.		241	0.094152	0.19475	6.5981e-13	1.28905e-06		1	0.361386	6.22021e-10	0.1306
chr8:17374621-17374653	4	AAAT	8	3	9,8,7	7	8	8	8	9	.	MTMR7	MTMR7	0	MTMR7_intron		cg27315958	chr8:17349310	-25327	.	MTMR7	MTMR7	.		182	-0.094644	0.31759	1.2071e-16	2.35828e-10		1	-0.706916	4.15098e-58	0.49973
chr8:17374621-17374653	4	AAAT	8	3	9,8,7	7	8	8	8	9	.	MTMR7	MTMR7	0	MTMR7_intron		cg06435363	chr8:17349162	-25475	.	MTMR7	MTMR7	.		239	-0.132836	0.28831	2.9928e-19	5.84694e-13		1	-0.567635	7.9185e-36	0.32221
chr8:17267468-17267486	2	GT	10	4	14,13,12,10	10	12	12	12	14	.	VPS37A	VPS37A	0	VPS37A_intron		cg18284672	chr8:17244469	-23008	.	CNOT7	CNOT7	CpG:_83_Shore_N		244	-0.044648	0.19061	8.8994e-13	1.73865e-06		1	-0.383458	4.86369e-12	0.14704
chr8:17256631-17256668	4	ATTT	10	4	12,11,10,9	9	10	10	10	12	.	VPS37A	VPS37A	0	VPS37A_intron		cg18284672	chr8:17244469	-12180.5	.	CNOT7	CNOT7	CpG:_83_Shore_N		244	-0.026229	0.15334	2.2916e-10	0.000447703		1	-0.426404	2.22152e-16	0.18182
chr8:16190706-16190730	4	CTTT	7	4	12,9,8,7	7	7	7	7	12	MSR1	MSR1	MSR1	0	MSR1_intron		cg16303562	chr8:16192824	2106	MSR1	.	MSR1	.		231	0.050764	0.17554	3.1049e-11	6.06595e-05		0	0	0	0
chr8:1575456-1575490	3	ATT	12	10	19,18,17,16,15,14,13,12,11,10	10	11	11	16	19	.	DLGAP2,DLGAP2-AS1	DLGAP2,DLGAP2-AS1	0	DLGAP2-AS1_intron,DLGAP2_intron		cg13402656	chr8:1563312	-12161	.	DLGAP2	DLGAP2	CpG:_140_Island		245	0.043594	0.41668	2.8466e-30	5.56132e-24		1	0.618765	6.34784e-45	0.38287
chr8:1554288-1554328	4	AAAT	10	3	11,10,9	9	9	10	10	11	.	DLGAP2	DLGAP2	0	DLGAP2_intron		cg13402656	chr8:1563312	9004	.	DLGAP2	DLGAP2	CpG:_140_Island		245	0.254853	0.58008	1.0983e-47	2.14572e-41		1	0.763976	3.49915e-85	0.58366
chr8:15537138-15537151	2	CT	10	3	11,10,9	9	10	11	11	11	.	.	TUSC3	2936	.		cg14639904	chr8:15536174	-970.5	.	.	TUSC3	CpG:_67_Shelf_N		245	0.01697	0.192	6.463e-13	1.26266e-06		0	0	0	0
chr8:1534784-1534827	2	GT	23	3	24,23,21	21	23	24	24	24	.	DLGAP2	DLGAP2	0	DLGAP2_intron		cg13402656	chr8:1563312	28506.5	.	DLGAP2	DLGAP2	CpG:_140_Island		244	-0.083667	0.20874	5.4956e-14	1.07366e-07		1	-0.422978	1.5671e-15	0.17891
chr8:15190329-15190367	4	ATTC	10	4	13,12,11,10	10	10	10	12	13	.	SGCZ	SGCZ	0	SGCZ_intron		cg07548638	chr8:15194169	3821	.	SGCZ	SGCZ	.		244	0.015602	0.19387	5.4193e-13	1.05875e-06		0	0	0	0
chr8:14497549-14497608	2	GT/AG	30	3	31,30,29	29	30	30	30	31	.	SGCZ	SGCZ	0	SGCZ_intron		cg27405903	chr8:14487879	-9699.5	.	SGCZ	SGCZ	.		244	-0.09239	0.17127	1.6303e-11	3.18507e-05		1	-0.693282	2.7375e-63	0.48064
chr8:144874712-144874739	2	AT	14	8	17,16,15,14,13,11,10,9	9	9	10	14	17	.	.	ZNF250	2216	.		cg23761161	chr8:144826584	-48141.5	ZNF7	.	ZNF7	CpG:_143_Island		244	-0.006387	0.20552	9.0513e-14	1.76833e-07		1	-0.397844	2.12325e-13	0.15828
chr8:144482076-144482096	3	CCG	7	4	8,7,6,5	5	6	7	7	8	.	PPP1R16A	PPP1R16A	0	PPP1R16A_intron		cg19682134	chr8:144524979	42894	.	LRRC14,LRRC24	LRRC24	CpG:_61_Island		242	0.064487	0.17295	1.5428e-11	3.01412e-05		1	0.516469	1.1781e-27	0.26674
chr8:144482076-144482096	3	CCG	7	4	8,7,6,5	5	6	7	7	8	.	PPP1R16A	PPP1R16A	0	PPP1R16A_intron		cg08302650	chr8:144524656	42571	.	LRRC14,LRRC24	LRRC24	CpG:_61_Island		242	0.078217	0.17824	7.032e-12	1.37382e-05		1	0.467055	5.57817e-21	0.21814
chr8:144482076-144482096	3	CCG	7	4	8,7,6,5	5	6	7	7	8	.	PPP1R16A	PPP1R16A	0	PPP1R16A_intron		cg17574911	chr8:144501305	19219	.	PPP1R16A	PPP1R16A	CpG:_113_Island		244	0.074709	0.2165	1.6371e-14	3.19835e-08		1	0.540518	2.53569e-31	0.29216
chr8:144482076-144482096	3	CCG	7	4	8,7,6,5	5	6	7	7	8	.	PPP1R16A	PPP1R16A	0	PPP1R16A_intron		cg02140542	chr8:144523517	41432	.	LRRC14,LRRC24	LRRC24	CpG:_125_Shore_S,CpG:_61_Shore_N		232	-0.065273	0.3146	1.2636e-20	2.46866e-14		1	-0.639461	1.44122e-49	0.40891
chr8:144117600-144117630	5	GTTTT	6	6	10,9,8,7,6,5	5	6	6	6	10	.	WDR97	WDR97	0	WDR97_3utr		cg06239191	chr8:144108233	-9382	WDR97	WDR97	WDR97	CpG:_216_Island		245	-0.064141	0.17722	6.0707e-12	1.18601e-05		1	-0.526925	1.6915e-29	0.27765
chr8:144117600-144117630	5	GTTTT	6	6	10,9,8,7,6,5	5	6	6	6	10	.	WDR97	WDR97	0	WDR97_3utr		cg14771070	chr8:144107689	-9926	WDR97	.	WDR97	CpG:_216_Shore_N		244	-0.044898	0.24055	3.5784e-16	6.99101e-10		1	-0.490856	7.02845e-24	0.24094
chr8:144117600-144117630	5	GTTTT	6	6	10,9,8,7,6,5	5	6	6	6	10	.	WDR97	WDR97	0	WDR97_3utr		cg26272248	chr8:144108131	-9484	WDR97	WDR97	WDR97	CpG:_216_Shore_N		245	-0.095771	0.33065	5.7883e-23	1.13084e-16		1	-0.563374	1.99915e-35	0.31739
chr8:144117600-144117630	5	GTTTT	6	6	10,9,8,7,6,5	5	6	6	6	10	.	WDR97	WDR97	0	WDR97_3utr		cg12091641	chr8:144126030	8415	.	.	WDR97	CpG:_45_Island		227	-0.045928	0.37518	9.0664e-25	1.77128e-18		1	-0.463853	1.38854e-20	0.21516
chr8:144117600-144117630	5	GTTTT	6	6	10,9,8,7,6,5	5	6	6	6	10	.	WDR97	WDR97	0	WDR97_3utr		cg07195118	chr8:144108002	-9613	WDR97	WDR97	WDR97	CpG:_216_Shore_N		244	-0.055149	0.35636	5.9753e-25	1.16738e-18		1	-0.566489	5.74925e-36	0.32091
chr8:144117600-144117630	5	GTTTT	6	6	10,9,8,7,6,5	5	6	6	6	10	.	WDR97	WDR97	0	WDR97_3utr		cg10020385	chr8:144104803	-12812	MAF1,SHARPIN	MAF1	MAF1	CpG:_163_Island		244	-0.08719	0.48468	1.062e-36	2.0748e-30		1	-0.739858	2.26928e-78	0.54739
chr8:143630020-143630055	2	AC	18	7	19,18,17,16,15,14,12	12	16	16	17	19	.	.	ZNF623	5964	.		cg01121071	chr8:143608535	-21502.5	PYCRL	PYCRL	PYCRL	CpG:_92_Shore_N		229	0.091206	0.22486	3.0606e-14	5.9794e-08		1	0.524871	3.06264e-25	0.27549
chr8:143630020-143630055	2	AC	18	7	19,18,17,16,15,14,12	12	16	16	17	19	.	.	ZNF623	5964	.		cg00021855	chr8:143608786	-21251.5	PYCRL	PYCRL	PYCRL	CpG:_92_Shore_N		229	0.120543	0.24235	2.2139e-15	4.32523e-09		1	0.540999	1.08596e-27	0.29268
chr8:143559982-143560001	5	AGGGC	5	6	9,8,7,6,5,4	4	5	5	6	9	LOC100310756	GSDMD	GSDMD	0	GSDMD_intron		cg23966224	chr8:143578459	18467.5	NAPRT	.	NAPRT	CpG:_94_Island		242	0.02018	0.1551	2.1073e-10	0.000411697		1	0.462385	1.86364e-20	0.2138
chr8:143559982-143560001	5	AGGGC	5	6	9,8,7,6,5,4	4	5	5	6	9	LOC100310756	GSDMD	GSDMD	0	GSDMD_intron		cg19357499	chr8:143578461	18469.5	NAPRT	.	NAPRT	CpG:_94_Island		245	0.020215	0.1538	1.9682e-10	0.000384521		1	0.474415	5.80249e-22	0.22507
chr8:143559982-143560001	5	AGGGC	5	6	9,8,7,6,5,4	4	5	5	6	9	LOC100310756	GSDMD	GSDMD	0	GSDMD_intron		cg15537850	chr8:143578881	18889.5	NAPRT	.	NAPRT	CpG:_94_Shore_S		244	0.037251	0.15944	9.3752e-11	0.00018316		1	0.288938	0.000226067	0.083485
chr8:143559982-143560001	5	AGGGC	5	6	9,8,7,6,5,4	4	5	5	6	9	LOC100310756	GSDMD	GSDMD	0	GSDMD_intron		cg17244719	chr8:143578831	18839.5	NAPRT	.	NAPRT	CpG:_94_Shore_S		244	0.04087	0.16862	2.4189e-11	4.72573e-05		1	0.305696	1.6602e-05	0.09345
chr8:143559982-143560001	5	AGGGC	5	6	9,8,7,6,5,4	4	5	5	6	9	LOC100310756	GSDMD	GSDMD	0	GSDMD_intron		cg26536354	chr8:143572784	12792.5	MROH6	.	MROH6	CpG:_20_Shore_S		243	0.041189	0.17208	1.5926e-11	3.11141e-05		1	0.332866	1.36413e-07	0.1108
chr8:143559982-143560001	5	AGGGC	5	6	9,8,7,6,5,4	4	5	5	6	9	LOC100310756	GSDMD	GSDMD	0	GSDMD_intron		cg21187068	chr8:143577457	17465.5	NAPRT	NAPRT	NAPRT	CpG:_94_Shore_N		245	0.024135	0.17892	4.7059e-12	9.19378e-06		1	0.295437	7.84373e-05	0.087283
chr8:143559982-143560001	5	AGGGC	5	6	9,8,7,6,5,4	4	5	5	6	9	LOC100310756	GSDMD	GSDMD	0	GSDMD_intron		cg01494348	chr8:143578225	18233.5	NAPRT	NAPRT	NAPRT	CpG:_94_Island		245	0.037964	0.20918	4.5518e-14	8.89272e-08		1	0.485695	1.72722e-23	0.2359
chr8:143559982-143560001	5	AGGGC	5	6	9,8,7,6,5,4	4	5	5	6	9	LOC100310756	GSDMD	GSDMD	0	GSDMD_intron		cg16294143	chr8:143578702	18710.5	NAPRT	.	NAPRT	CpG:_94_Shore_S		245	0.028732	0.24487	1.5434e-16	3.01529e-10		1	0.456289	9.11979e-20	0.2082
chr8:143559982-143560001	5	AGGGC	5	6	9,8,7,6,5,4	4	5	5	6	9	LOC100310756	GSDMD	GSDMD	0	GSDMD_intron		cg13282195	chr8:143578602	18610.5	NAPRT	.	NAPRT	CpG:_94_Shore_S		241	0.063688	0.272	3.2758e-18	6.39983e-12		1	0.476812	3.26426e-22	0.22735
chr8:143559982-143560001	5	AGGGC	5	6	9,8,7,6,5,4	4	5	5	6	9	LOC100310756	GSDMD	GSDMD	0	GSDMD_intron		cg25786937	chr8:143578661	18669.5	NAPRT	.	NAPRT	CpG:_94_Shore_S		245	0.056663	0.27989	4.5143e-19	8.81945e-13		1	0.480229	9.07027e-23	0.23062
chr8:143559982-143560001	5	AGGGC	5	6	9,8,7,6,5,4	4	5	5	6	9	LOC100310756	GSDMD	GSDMD	0	GSDMD_intron		cg17524265	chr8:143577713	17721.5	NAPRT	NAPRT	NAPRT	CpG:_94_Island		245	0.108213	0.33487	2.6641e-23	5.20477e-17		1	0.519577	2.98551e-28	0.26996
chr8:143559982-143560001	5	AGGGC	5	6	9,8,7,6,5,4	4	5	5	6	9	LOC100310756	GSDMD	GSDMD	0	GSDMD_intron		cg08017634	chr8:143577661	17669.5	NAPRT	NAPRT	NAPRT	CpG:_94_Island		245	0.082176	0.35507	6.1155e-25	1.19477e-18		1	0.516672	8.03399e-28	0.26695
chr8:143516526-143516580	2	AC	28	17	31,30,29,28,27,26,25,24,23,22,21,20,19,18,15,13,9	9	24	24	27	31	.	ZC3H3	ZC3H3	0	ZC3H3_intron		cg03367493	chr8:143559924	43371	GSDMD	GSDMD	GSDMD	CpG:_41_Shore_S,CpG:_46_Shore_N		240	-0.00732	0.15489	2.5798e-10	0.000504008		1	-0.309509	1.48013e-05	0.095796
chr8:143516526-143516580	2	AC	28	17	31,30,29,28,27,26,25,24,23,22,21,20,19,18,15,13,9	9	24	24	27	31	.	ZC3H3	ZC3H3	0	ZC3H3_intron		cg22312904	chr8:143557090	40537	GSDMD	GSDMD	GSDMD	CpG:_41_Shore_N		240	-0.009842	0.19937	3.6702e-13	7.17036e-07		1	-0.422469	2.39103e-15	0.17848
chr8:143377036-143377073	2	GT	19	7	21,20,19,18,15,14,13	13	20	20	20	21	.	RHPN1	RHPN1	0	RHPN1_intron		cg14002258	chr8:143350104	-26950.5	.	TOP1MT	TOP1MT	.		241	-0.011899	0.15985	1.1536e-10	0.000225375		1	-0.642339	6.20103e-49	0.4126
chr8:143377036-143377073	2	GT	19	7	21,20,19,18,15,14,13	13	20	20	20	21	.	RHPN1	RHPN1	0	RHPN1_intron		cg23629150	chr8:143334234	-42820.5	TOP1MT	TOP1MT	TOP1MT	CpG:_33_Shore_N		235	-0.025282	0.27685	3.9081e-18	7.63514e-12		1	-0.626833	1.62019e-45	0.39292
chr8:143377036-143377073	2	GT	19	7	21,20,19,18,15,14,13	13	20	20	20	21	.	RHPN1	RHPN1	0	RHPN1_intron		cg12188860	chr8:143334315	-42739.5	TOP1MT	TOP1MT	TOP1MT	CpG:_33_Shore_N		234	-0.030244	0.3003	9.6781e-20	1.89078e-13		1	-0.583635	3.84229e-37	0.34063
chr8:143377036-143377073	2	GT	19	7	21,20,19,18,15,14,13	13	20	20	20	21	.	RHPN1	RHPN1	0	RHPN1_intron		cg19774973	chr8:143338109	-38945.5	.	TOP1MT	TOP1MT	CpG:_33_Shelf_S		219	-0.096121	0.7235	1.6849e-62	3.29174e-56		1	-0.898076	9.25133e-158	0.80654
chr8:143347689-143347732	4	AGCC	11	6	13,12,11,10,9,8	8	9	9	11	13	.	TOP1MT	TOP1MT	0	TOP1MT_intron		cg19774973	chr8:143338109	-9601.5	.	TOP1MT	TOP1MT	CpG:_33_Shelf_S		222	0.090676	0.17634	6.7741e-11	0.000132344		1	0.383575	1.35284e-11	0.14713
chr8:143347689-143347732	4	AGCC	11	6	13,12,11,10,9,8	8	9	9	11	13	.	TOP1MT	TOP1MT	0	TOP1MT_intron		cg22123784	chr8:143355337	7626.5	.	TOP1MT	TOP1MT	.		245	0.045726	0.1756	7.7526e-12	1.5146e-05		1	0.4195	1.6646e-15	0.17598
chr8:143347689-143347732	4	AGCC	11	6	13,12,11,10,9,8	8	9	9	11	13	.	TOP1MT	TOP1MT	0	TOP1MT_intron		cg11975813	chr8:143326730	-20980.5	.	TOP1MT	TOP1MT	.		244	-0.041911	0.20904	5.2476e-14	1.02521e-07		1	-0.663438	8.85142e-56	0.44015
chr8:143341980-143341994	3	ATT	7	3	7,6,5	5	5	5	6	7	.	TOP1MT	TOP1MT	0	TOP1MT_intron		cg19774973	chr8:143338109	-3878	.	TOP1MT	TOP1MT	CpG:_33_Shelf_S		208	0.098558	0.18546	8.4207e-11	0.000164513		1	0.395436	1.52294e-07	0.15637
chr8:143341980-143341994	3	ATT	7	3	7,6,5	5	5	5	6	7	.	TOP1MT	TOP1MT	0	TOP1MT_intron		cg11975813	chr8:143326730	-15257	.	TOP1MT	TOP1MT	.		223	-0.064901	0.37455	2.6201e-24	5.11881e-18		1	-0.751445	2.3744e-56	0.56467
chr8:143268839-143268861	3	CTG	8	14	21,20,19,18,17,16,15,14,13,12,11,10,9,8	8	13	16	17	21	.	GLI4	GLI4	0	GLI4_intron		cg08715432	chr8:143281009	12159	MINCR	MINCR	MINCR	CpG:_73_Shore_S		237	-0.006808	0.15455	3.5041e-10	0.000684586		1	-0.307617	1.91148e-05	0.094628
chr8:143186919-143186947	2	GT	15	4	17,16,15,14	14	15	15	15	17	.	.	LY6H	26266	.		cg22258713	chr8:143186101	-832	.	.	LY6H	CpG:_52_Island		243	0.073473	0.2827	3.9138e-19	7.64627e-13		1	0.57328	8.08273e-37	0.32865
chr8:143186919-143186947	2	GT	15	4	17,16,15,14	14	15	15	15	17	.	.	LY6H	26266	.		cg23193613	chr8:143186308	-625	.	.	LY6H	CpG:_52_Island		243	0.141681	0.37422	2.4528e-26	4.79196e-20		1	0.608679	8.67212e-43	0.37049
chr8:143181971-143182005	2	CT	18	4	21,20,19,18	18	18	20	20	21	.	.	LY6H	21318	.		cg08650125	chr8:143179313	-2675	.	.	LY6H	.		176	0.035617	0.21571	8.4127e-11	0.000164356		1	0.430616	4.01866e-11	0.18543
chr8:143181971-143182005	2	CT	18	4	21,20,19,18	18	18	20	20	21	.	.	LY6H	21318	.		cg19696211	chr8:143169639	-12349	.	.	LY6H	.		176	-0.045527	0.22423	3.1921e-11	6.23631e-05		1	-0.464866	4.35221e-14	0.2161
chr8:143181971-143182005	2	CT	18	4	21,20,19,18	18	18	20	20	21	.	.	LY6H	21318	.		cg04751549	chr8:143179361	-2627	.	.	LY6H	.		177	0.054775	0.28955	1.1276e-14	2.20296e-08		1	0.541876	4.104e-22	0.29363
chr8:143181971-143182005	2	CT	18	4	21,20,19,18	18	18	20	20	21	.	.	LY6H	21318	.		cg15268456	chr8:143179254	-2734	.	.	LY6H	.		177	0.043736	0.30161	2.4733e-15	4.83201e-09		1	0.517223	2.55429e-19	0.26752
chr8:143176728-143176797	4	GTTT	18	7	22,21,20,19,18,17,16	16	17	17	18	22	.	.	LY6H	16075	.		cg19979039	chr8:143174020	-2742.5	.	.	LY6H	.		244	-0.025244	0.14879	4.4443e-10	0.00086827		1	-0.37339	6.17421e-11	0.13942
chr8:143176728-143176797	4	GTTT	18	7	22,21,20,19,18,17,16	16	17	17	18	22	.	.	LY6H	16075	.		cg15268456	chr8:143179254	2491.5	.	.	LY6H	.		244	-0.026926	0.15378	2.1499e-10	0.00042002		1	-0.373938	5.50222e-11	0.13983
chr8:143176728-143176797	4	GTTT	18	7	22,21,20,19,18,17,16	16	17	17	18	22	.	.	LY6H	16075	.		cg08650125	chr8:143179313	2550.5	.	.	LY6H	.		244	-0.026023	0.15445	1.9479e-10	0.000380555		1	-0.282585	0.000592875	0.079854
chr8:143176728-143176797	4	GTTT	18	7	22,21,20,19,18,17,16	16	17	17	18	22	.	.	LY6H	16075	.		cg19696211	chr8:143169639	-7123.5	.	.	LY6H	.		244	0.039239	0.24689	1.282e-16	2.5046e-10		1	0.431266	7.96607e-17	0.18599
chr8:143066149-143066185	5	CTTTT	8	8	14,13,12,11,10,9,8,7	7	10	11	12	14	.	.	C8orf31	11847	.		cg10439896	chr8:143073569	7402	.	.	C8orf31	CpG:_137_Island		241	-0.048135	0.25897	2.792e-17	5.45465e-11		1	-0.477975	7.49021e-22	0.22846
chr8:143066149-143066185	5	CTTTT	8	8	14,13,12,11,10,9,8,7	7	10	11	12	14	.	.	C8orf31	11847	.		cg23986375	chr8:143073875	7708	.	.	C8orf31	CpG:_137_Island		240	-0.036774	0.26746	8.1277e-18	1.58788e-11		1	-0.482587	1.29689e-22	0.23289
chr8:143066149-143066185	5	CTTTT	8	8	14,13,12,11,10,9,8,7	7	10	11	12	14	.	.	C8orf31	11847	.		cg17387571	chr8:143056116	-10051	.	.	C8orf31	.		241	-0.043631	0.38732	3.088e-27	6.03293e-21		1	-0.74195	4.82963e-78	0.55049
chr8:143065726-143065849	4	CTTT	31	9	35,34,33,32,31,30,29,28,27	27	31	34	35	35	.	.	C8orf31	11424	.		cg00002224	chr8:143038982	-26805.5	C8orf31	.	C8orf31	.		214	-0.017203	0.18971	2.5525e-11	4.98674e-05		0	0	0	0
chr8:143065726-143065849	4	CTTT	31	9	35,34,33,32,31,30,29,28,27	27	31	34	35	35	.	.	C8orf31	11424	.		cg23986375	chr8:143073875	8087.5	.	.	C8orf31	CpG:_137_Island		209	0.018949	0.20565	5.3767e-12	1.05043e-05		0	0	0	0
chr8:143065726-143065849	4	CTTT	31	9	35,34,33,32,31,30,29,28,27	27	31	34	35	35	.	.	C8orf31	11424	.		cg21015266	chr8:143039231	-26556.5	C8orf31	C8orf31	C8orf31	.		214	-0.017202	0.26382	8.3634e-16	1.63393e-09		0	0	0	0
chr8:143065726-143065849	4	CTTT	31	9	35,34,33,32,31,30,29,28,27	27	31	34	35	35	.	.	C8orf31	11424	.		cg10439896	chr8:143073569	7781.5	.	.	C8orf31	CpG:_137_Island		210	0.029334	0.28479	7.4354e-17	1.45263e-10		0	0	0	0
chr8:143065726-143065849	4	CTTT	31	9	35,34,33,32,31,30,29,28,27	27	31	34	35	35	.	.	C8orf31	11424	.		cg03029255	chr8:143039264	-26523.5	C8orf31	C8orf31	C8orf31	.		214	-0.028927	0.30211	2.7228e-18	5.31945e-12		0	0	0	0
chr8:143065726-143065849	4	CTTT	31	9	35,34,33,32,31,30,29,28,27	27	31	34	35	35	.	.	C8orf31	11424	.		cg07770222	chr8:143038689	-27098.5	C8orf31	.	C8orf31	.		214	-0.032778	0.30988	8.2045e-19	1.60289e-12		0	0	0	0
chr8:143065726-143065849	4	CTTT	31	9	35,34,33,32,31,30,29,28,27	27	31	34	35	35	.	.	C8orf31	11424	.		cg22915785	chr8:143038694	-27093.5	C8orf31	.	C8orf31	.		214	-0.032322	0.31263	5.3508e-19	1.04537e-12		0	0	0	0
chr8:143065726-143065849	4	CTTT	31	9	35,34,33,32,31,30,29,28,27	27	31	34	35	35	.	.	C8orf31	11424	.		cg03058664	chr8:143039218	-26569.5	C8orf31	C8orf31	C8orf31	.		214	-0.02654	0.31893	1.9972e-19	3.90187e-13		0	0	0	0
chr8:143065726-143065849	4	CTTT	31	9	35,34,33,32,31,30,29,28,27	27	31	34	35	35	.	.	C8orf31	11424	.		cg08540654	chr8:143039200	-26587.5	C8orf31	.	C8orf31	.		214	-0.026861	0.37392	2.4615e-23	4.80896e-17		0	0	0	0
chr8:143065726-143065849	4	CTTT	31	9	35,34,33,32,31,30,29,28,27	27	31	34	35	35	.	.	C8orf31	11424	.		cg22829325	chr8:143039067	-26720.5	C8orf31	.	C8orf31	.		214	-0.03173	0.39578	5.5396e-25	1.08226e-18		0	0	0	0
chr8:143061502-143061531	4	GGTT	8	4	9,8,7,6	6	8	8	8	9	.	.	C8orf31	7200	.		cg17001448	chr8:143070959	9442.5	.	.	C8orf31	CpG:_137_Shore_N		245	-0.074272	0.14973	3.5676e-10	0.000696991		0	0	0	0
chr8:143061502-143061531	4	GGTT	8	4	9,8,7,6	6	8	8	8	9	.	.	C8orf31	7200	.		cg00002224	chr8:143038982	-22534.5	C8orf31	.	C8orf31	.		245	-0.092183	0.16154	6.2924e-11	0.000122933		0	0	0	0
chr8:143061502-143061531	4	GGTT	8	4	9,8,7,6	6	8	8	8	9	.	.	C8orf31	7200	.		cg03029255	chr8:143039264	-22252.5	C8orf31	C8orf31	C8orf31	.		245	-0.13235	0.18325	2.445e-12	4.77672e-06		0	0	0	0
chr8:143061502-143061531	4	GGTT	8	4	9,8,7,6	6	8	8	8	9	.	.	C8orf31	7200	.		cg22915785	chr8:143038694	-22822.5	C8orf31	.	C8orf31	.		245	-0.153128	0.20413	9.9848e-14	1.9507e-07		0	0	0	0
chr8:143061502-143061531	4	GGTT	8	4	9,8,7,6	6	8	8	8	9	.	.	C8orf31	7200	.		cg07770222	chr8:143038689	-22827.5	C8orf31	.	C8orf31	.		245	-0.156284	0.20726	6.1432e-14	1.20018e-07		0	0	0	0
chr8:143061502-143061531	4	GGTT	8	4	9,8,7,6	6	8	8	8	9	.	.	C8orf31	7200	.		cg21015266	chr8:143039231	-22285.5	C8orf31	C8orf31	C8orf31	.		245	-0.097078	0.21103	3.4125e-14	6.6669e-08		0	0	0	0
chr8:143061502-143061531	4	GGTT	8	4	9,8,7,6	6	8	8	8	9	.	.	C8orf31	7200	.		cg22222355	chr8:143072744	11227.5	.	.	C8orf31	CpG:_137_Island		245	0.03301	0.23708	5.4606e-16	1.06682e-09		0	0	0	0
chr8:143061502-143061531	4	GGTT	8	4	9,8,7,6	6	8	8	8	9	.	.	C8orf31	7200	.		cg03058664	chr8:143039218	-22298.5	C8orf31	C8orf31	C8orf31	.		245	-0.142427	0.23909	3.9459e-16	7.70899e-10		0	0	0	0
chr8:143061502-143061531	4	GGTT	8	4	9,8,7,6	6	8	8	8	9	.	.	C8orf31	7200	.		cg08540654	chr8:143039200	-22316.5	C8orf31	.	C8orf31	.		245	-0.144593	0.27097	2.0486e-18	4.00229e-12		0	0	0	0
chr8:143061502-143061531	4	GGTT	8	4	9,8,7,6	6	8	8	8	9	.	.	C8orf31	7200	.		cg22829325	chr8:143039067	-22449.5	C8orf31	.	C8orf31	.		245	-0.184445	0.32195	2.8148e-22	5.49919e-16		1	-0.289503	0.000950659	0.083812
chr8:143061502-143061531	4	GGTT	8	4	9,8,7,6	6	8	8	8	9	.	.	C8orf31	7200	.		cg23986375	chr8:143073875	12358.5	.	.	C8orf31	CpG:_137_Island		240	0.209096	0.62787	5.3259e-53	1.04051e-46		1	0.598164	4.82376e-38	0.3578
chr8:143061502-143061531	4	GGTT	8	4	9,8,7,6	6	8	8	8	9	.	.	C8orf31	7200	.		cg10439896	chr8:143073569	12052.5	.	.	C8orf31	CpG:_137_Island		241	0.283695	0.67598	2.041e-60	3.98744e-54		1	0.660871	3.79982e-50	0.43675
chr8:142843256-142843299	2	AC	22	18	32,31,30,29,28,27,26,25,24,23,22,21,20,19,18,17,16,15	15	17	21	27	32	.	GML	GML	0	GML_intron		cg00245850	chr8:142844097	819.5	.	GML	GML	.		245	0.007811	0.17629	6.9884e-12	1.3653e-05		1	0.422706	2.75492e-15	0.17868
chr8:142809029-142809043	2	GT	10	5	11,10,9,8,7	7	10	11	11	11	.	.	LY6D	22491	.		cg03405983	chr8:142777132	-31904	LYNX1	LYNX1	LYNX1	CpG:_118_Island		241	-0.072465	0.27529	1.8926e-18	3.69752e-12		1	-0.617722	1.92042e-45	0.38158
chr8:142809029-142809043	2	GT	10	5	11,10,9,8,7	7	10	11	11	11	.	.	LY6D	22491	.		cg17888033	chr8:142776998	-32038	LYNX1	LYNX1	LYNX1	CpG:_118_Island		240	-0.084423	0.28028	9.7089e-19	1.8968e-12		1	-0.69084	6.67043e-63	0.47726
chr8:142767888-142767935	4	AATG	12	8	15,14,13,12,11,10,9,8	8	11	12	12	15	SLURP2	LYNX1-SLURP2,SLURP2	SLURP2,LYNX1-SLURP2	0	LYNX1-SLURP2_intron,SLURP2_intron		cg11351841	chr8:142760192	-7719.5	.	.	LYNX1	.		242	0.031145	0.16147	8.3344e-11	0.000162827		1	0.319625	1.7845e-06	0.10216
chr8:142738012-142738033	2	GT	11	4	12,11,10,9	9	9	11	11	12	.	.	THEM6	1086	.		cg11351841	chr8:142760192	22169.5	.	.	LYNX1	.		242	0.04638	0.37428	3.0696e-26	5.99699e-20		1	0.647163	2.64002e-51	0.41882
chr8:142689703-142689725	2	AC	12	4	13,12,11,10	10	11	12	12	13	.	.	PSCA	6979	.		cg13446199	chr8:142681448	-8266	PSCA	PSCA	PSCA	.		242	-0.152199	0.3128	2.569e-21	5.01898e-15		1	-0.620484	5.08195e-46	0.385
chr8:142669164-142669211	2	GT	25	16	30,29,28,27,26,25,24,23,22,21,20,19,18,13,12,11	11	19	23	25	30	JRK,PSCA	JRK	JRK	0	JRK_intron		cg16135527	chr8:142637297	-31955.5	LOC101928087	.	LOC101928087	.		244	-0.00779	0.18931	1.0836e-12	2.117e-06		0	0	0	0
chr8:142548045-142548104	3	ATG	20	4	29,26,23,20	20	20	23	26	29	.	.	ADGRB1	3039	.		cg05262755	chr8:142563712	15637.5	.	.	ADGRB1	CpG:_42_Island		230	0.010717	0.28925	1.2101e-18	2.36414e-12		1	0.459456	3.15679e-18	0.2111
chr8:142469158-142469181	2	GT	16	4	18,17,16,15	15	18	18	18	18	.	ADGRB1	ADGRB1	0	ADGRB1_intron		cg02048922	chr8:142465497	-3672.5	ADGRB1	ADGRB1	ADGRB1	CpG:_72_Shore_S		240	-0.052204	0.15784	1.6863e-10	0.000329447		0	0	0	0
chr8:142469158-142469181	2	GT	16	4	18,17,16,15	15	18	18	18	18	.	ADGRB1	ADGRB1	0	ADGRB1_intron		cg20063965	chr8:142465163	-4006.5	ADGRB1	ADGRB1	ADGRB1	CpG:_72_Shore_S		241	-0.042533	0.27064	4.0993e-18	8.00868e-12		1	-0.497614	1.14435e-24	0.24762
chr8:142469158-142469181	2	GT	16	4	18,17,16,15	15	18	18	18	18	.	ADGRB1	ADGRB1	0	ADGRB1_intron		cg14634760	chr8:142479678	10508.5	.	ADGRB1	ADGRB1	CpG:_27_Shelf_S		241	0.028052	0.28752	2.4267e-19	4.74097e-13		1	0.364993	4.31169e-10	0.13322
chr8:142469158-142469181	2	GT	16	4	18,17,16,15	15	18	18	18	18	.	ADGRB1	ADGRB1	0	ADGRB1_intron		cg04678462	chr8:142479460	10290.5	.	ADGRB1	ADGRB1	CpG:_27_Shore_S		241	0.033758	0.3493	4.3306e-24	8.46056e-18		1	0.487668	2.14557e-23	0.23782
chr8:142122873-142122913	2	AC	21	3	21,20,19	19	20	20	20	21	.	.	MIR4472-1	53426	.		cg25088279	chr8:142118193	-4700	.	.	MIR4472-1	CpG:_18_Shelf_N		236	0.098181	0.2657	2.0285e-17	3.96302e-11		1	0.585952	2.86533e-36	0.34334
chr8:142122781-142122821	2	AC	23	2	22,21	21	22	22	22	22	.	.	MIR4472-1	53518	.		cg25088279	chr8:142118193	-4608	.	.	MIR4472-1	CpG:_18_Shelf_N		241	0.107665	0.30149	2.2238e-20	4.34457e-14		1	0.600974	3.45315e-41	0.36117
chr8:1419442-1419475	2	GT	20	7	22,21,20,19,18,17,16	16	18	19	20	22	.	DLGAP2	DLGAP2	0	DLGAP2_intron		cg25601471	chr8:1416861	-2597.5	.	.	DLGAP2	CpG:_25_Shore_N		234	-0.060375	0.15915	2.3744e-10	0.000463879		1	-0.416809	7.684e-09	0.17373
chr8:1419442-1419475	2	GT	20	7	22,21,20,19,18,17,16	16	18	19	20	22	.	DLGAP2	DLGAP2	0	DLGAP2_intron		cg02490460	chr8:1417336	-2122.5	.	.	DLGAP2	CpG:_25_Island		235	-0.076161	0.18386	6.281e-12	1.2271e-05		1	-0.44652	4.34712e-11	0.19938
chr8:1419442-1419475	2	GT	20	7	22,21,20,19,18,17,16	16	18	19	20	22	.	DLGAP2	DLGAP2	0	DLGAP2_intron		cg12624580	chr8:1395780	-23678.5	.	.	LOC286083	CpG:_14_Shore_N,CpG:_14_Shore_S,CpG:_24_Shore_S,CpG:_58_Shore_S		238	-0.033962	0.18277	5.4087e-12	1.05668e-05		1	-0.442821	7.62938e-11	0.19609
chr8:1419442-1419475	2	GT	20	7	22,21,20,19,18,17,16	16	18	19	20	22	.	DLGAP2	DLGAP2	0	DLGAP2_intron		cg27134251	chr8:1416883	-2575.5	.	.	DLGAP2	CpG:_25_Shore_N		235	-0.084904	0.22514	1.3492e-14	2.63589e-08		1	-0.501827	6.62697e-16	0.25183
chr8:1419206-1419233	2	GT	15	8	17,16,15,14,13,12,11,10	10	11	11.5	14	17	.	DLGAP2	DLGAP2	0	DLGAP2_intron		cg12624580	chr8:1395780	-23439.5	.	.	LOC286083	CpG:_14_Shore_N,CpG:_14_Shore_S,CpG:_24_Shore_S,CpG:_58_Shore_S		240	-0.018295	0.1577	1.7214e-10	0.000336305		1	-0.364527	1.87203e-09	0.13288
chr8:1419206-1419233	2	GT	15	8	17,16,15,14,13,12,11,10	10	11	11.5	14	17	.	DLGAP2	DLGAP2	0	DLGAP2_intron		cg02490460	chr8:1417336	-1883.5	.	.	DLGAP2	CpG:_25_Island		237	-0.0428	0.17931	9.931e-12	1.94019e-05		0	0	0	0
chr8:1419206-1419233	2	GT	15	8	17,16,15,14,13,12,11,10	10	11	11.5	14	17	.	DLGAP2	DLGAP2	0	DLGAP2_intron		cg27134251	chr8:1416883	-2336.5	.	.	DLGAP2	CpG:_25_Shore_N		237	-0.049067	0.22748	7.258e-15	1.41797e-08		1	-0.395361	3.81234e-12	0.15631
chr8:141563606-141563684	4	ATCC	21	10	29,28,27,26,25,24,23,22,21,20	20	21	23	26	29	.	.	MROH5	56377	.		cg20554847	chr8:141548859	-14786	.	.	MROH5	.		214	-0.008015	0.17139	2.8654e-10	0.000559805		1	-0.388754	1.30811e-11	0.15113
chr8:141563606-141563684	4	ATCC	21	10	29,28,27,26,25,24,23,22,21,20	20	21	23	26	29	.	.	MROH5	56377	.		cg24403812	chr8:141541684	-21961	.	.	MROH5	.		216	-0.012118	0.22032	3.1118e-13	6.07943e-07		1	-0.619968	1.3878e-43	0.38436
chr8:141561600-141561626	2	AC	14	3	16,15,14	14	14	15	15	16	.	.	MROH5	54371	.		cg24403812	chr8:141541684	-19929	.	.	MROH5	.		245	-0.048571	0.17922	4.4936e-12	8.77901e-06		1	-0.426239	5.21173e-16	0.18168
chr8:141554360-141554413	2	AG	27	10	29,28,26,24,23,22,21,20,19,15	15	15	22	22	29	.	.	MROH5	47131	.		cg20554847	chr8:141548859	-5527.5	.	.	MROH5	.		243	-0.004566	0.15461	2.0747e-10	0.000405328		0	0	0	0
chr8:141462063-141462106	2	AC	22	16	37,33,32,31,30,29,28,27,26,25,24,23,22,21,20,18	18	22	28	29	37	.	MROH5	MROH5	0	MROH5_intron		cg19593660	chr8:141472922	10837.5	.	MROH5	MROH5	.		243	0.009125	0.17479	1.0641e-11	2.0789e-05		0	0	0	0
chr8:141414062-141414084	2	GT	13	3	14,13,12	12	12	13	13	14	.	PTP4A3	PTP4A3	0	PTP4A3_intron		cg18974499	chr8:141406413	-7660	.	.	PTP4A3	.		245	0.067058	0.1751	8.3531e-12	1.63192e-05		1	0.43901	1.07778e-17	0.19273
chr8:141414062-141414084	2	GT	13	3	14,13,12	12	12	13	13	14	.	PTP4A3	PTP4A3	0	PTP4A3_intron		cg24911891	chr8:141394951	-19122	.	.	PTP4A3	CpG:_93_Shelf_S		217	0.085383	0.34334	2.1261e-21	4.1537e-15		1	0.45664	1.04614e-17	0.20852
chr8:141383359-141383387	4	AAAC	8	5	11,10,9,8,7	7	8	8	10	11	.	.	PTP4A3	8634	.		cg24911891	chr8:141394951	11578	.	.	PTP4A3	CpG:_93_Shelf_S		217	-0.040266	0.3246	4.5039e-20	8.79913e-14		1	-0.474173	1.20648e-19	0.22484
chr8:141271849-141271874	2	AC	15	4	17,16,15,14	14	15	15	16	17	.	.	LOC105375787	15033	.		cg20216313	chr8:141295541	23679.5	.	.	LOC105375787	.		233	-0.088885	0.17732	1.9791e-11	3.86651e-05		1	-0.556273	4.4311e-33	0.30944
chr8:141271849-141271874	2	AC	15	4	17,16,15,14	14	15	15	16	17	.	.	LOC105375787	15033	.		cg03314380	chr8:141276939	5077.5	.	.	LOC105375787	.		232	-0.064988	0.35015	2.6232e-23	5.12487e-17		1	-0.392403	2.38497e-12	0.15398
chr8:141269459-141269490	2	GT	16	5	18,17,16,15,14	14	14	16	16	18	.	.	LOC105375787	12643	.		cg20216313	chr8:141295541	26066.5	.	.	LOC105375787	.		244	0.040575	0.15893	1.0111e-10	0.000197536		1	0.544702	4.56166e-32	0.2967
chr8:141269459-141269490	2	GT	16	5	18,17,16,15,14	14	14	16	16	18	.	.	LOC105375787	12643	.		cg03314380	chr8:141276939	7464.5	.	.	LOC105375787	.		243	0.024807	0.21859	1.3377e-14	2.61342e-08		1	0.370095	1.13372e-10	0.13697
chr8:141239575-141239614	2	AC	20	6	23,21,20,19,18,16	16	19	19	20	23	.	SLC45A4	SLC45A4	0	SLC45A4_intron		cg13037738	chr8:141238781	-813.5	.	SLC45A4	SLC45A4	.		168	0.011416	0.33393	2.3785e-16	4.6468e-10		1	0.586848	4.29075e-26	0.34439
chr8:140830076-140830111	2	AC	18	6	20,19,18,17,16,15	15	15	17	18	20	.	PTK2	PTK2	0	PTK2_intron		cg22262325	chr8:140839489	9395.5	.	PTK2	PTK2	.		244	0.034781	0.26132	1.1998e-17	2.34401e-11		1	0.636585	3.71153e-49	0.40524
chr8:140552729-140552773	2	CG/AC	24	15	29,28,27,26,25,24,23,22,21,20,19,18,17,16,15	15	17	17	23	29	.	AGO2	AGO2	0	AGO2_intron		cg00288598	chr8:140545196	-7555	.	AGO2	AGO2	CpG:_20_Shelf_N		241	0.01063	0.18721	2.0475e-12	4.00014e-06		0	0	0	0
chr8:140269544-140269591	4	AAAT	12	5	13,12,11,10,9	9	9	11	12	13	.	TRAPPC9	TRAPPC9	0	TRAPPC9_intron		cg19435547	chr8:140265061	-4506.5	.	TRAPPC9	TRAPPC9	.		245	0.009533	0.14745	4.9819e-10	0.000973299		1	0.39945	2.28083e-13	0.15956
chr8:140269544-140269591	4	AAAT	12	5	13,12,11,10,9	9	9	11	12	13	.	TRAPPC9	TRAPPC9	0	TRAPPC9_intron		cg12443985	chr8:140265008	-4559.5	.	TRAPPC9	TRAPPC9	.		245	0.016217	0.20084	1.6622e-13	3.24739e-07		1	0.394892	6.37661e-13	0.15594
chr8:140269544-140269591	4	AAAT	12	5	13,12,11,10,9	9	9	11	12	13	.	TRAPPC9	TRAPPC9	0	TRAPPC9_intron		cg01895805	chr8:140256604	-12963.5	.	TRAPPC9	TRAPPC9	.		244	0.027067	0.2456	1.5799e-16	3.0866e-10		1	0.337905	7.83257e-08	0.11418
chr8:140269544-140269591	4	AAAT	12	5	13,12,11,10,9	9	9	11	12	13	.	TRAPPC9	TRAPPC9	0	TRAPPC9_intron		cg24337701	chr8:140265092	-4475.5	.	TRAPPC9	TRAPPC9	.		242	0.067191	0.38537	3.5406e-27	6.91716e-21		1	0.620878	1.42816e-45	0.38549
chr8:140052212-140052248	3	AAC	12	8	13,12,11,10,9,8,7,6	6	7	9	12	13	.	TRAPPC9	TRAPPC9	0	TRAPPC9_intron		cg02642126	chr8:140036419	-15812	.	TRAPPC9	TRAPPC9	.		243	-0.020286	0.18702	1.7038e-12	3.32866e-06		1	-0.412868	1.20673e-14	0.17046
chr8:140052212-140052248	3	AAC	12	8	13,12,11,10,9,8,7,6	6	7	9	12	13	.	TRAPPC9	TRAPPC9	0	TRAPPC9_intron		cg26048923	chr8:140047188	-5043	.	TRAPPC9	TRAPPC9	CpG:_20_Island		245	0.013219	0.1923	6.1689e-13	1.2052e-06		1	0.402467	1.36497e-13	0.16198
chr8:140042201-140042234	2	GT	17	9	19,18,17,16,15,14,13,12,10	10	15	15	17	19	.	TRAPPC9	TRAPPC9	0	TRAPPC9_intron		cg02642126	chr8:140036419	-5798.5	.	TRAPPC9	TRAPPC9	.		243	-0.050745	0.34785	3.6785e-24	7.18658e-18		1	-0.496508	6.87909e-25	0.24652
chr8:138840535-138840558	2	AC	13	7	16,15,14,13,12,11,9	9	13	15	15	16	.	COL22A1	COL22A1	0	COL22A1_intron		cg13892472	chr8:138835662	-4884.5	.	COL22A1	COL22A1	.		244	-0.051437	0.30609	5.7575e-21	1.12483e-14		1	-0.643522	1.58932e-51	0.41412
chr8:138517705-138517731	4	AAAC	7	4	11,9,8,7	7	7	7	8	11	.	.	FAM135B	19976	.		cg24570302	chr8:138500760	-16958	.	.	FAM135B	CpG:_94_Shelf_S		209	0.12431	0.32458	2.2113e-19	4.32015e-13		1	0.603689	1.17489e-37	0.36444
chr8:138507068-138507123	2	AT/AG	29	17	42,41,40,39,38,37,36,35,34,33,32,31,30,29,28,27,23	23	36	37	39	42	.	.	FAM135B	9339	.		cg24570302	chr8:138500760	-6335.5	.	.	FAM135B	CpG:_94_Shelf_S		184	-0.018778	0.35168	7.358e-19	1.43751e-12		0	0	0	0
chr8:138505328-138505347	2	AC	10	4	14,12,11,10	10	10	10	10	14	.	.	FAM135B	7599	.		cg24570302	chr8:138500760	-4577.5	.	.	FAM135B	CpG:_94_Shelf_S		209	0.126568	0.45528	4.0375e-29	7.88794e-23		1	0.820213	8.04437e-100	0.67275
chr8:138504436-138504482	2	GT	28	15	33,32,31,30,29,28,27,26,25,24,23,22,21,20,18	18	25	26	27	33	.	.	FAM135B	6707	.		cg24570302	chr8:138500760	-3699	.	.	FAM135B	CpG:_94_Shelf_S		207	-0.027936	0.3434	1.765e-20	3.44823e-14		1	-0.690355	1.07392e-45	0.47659
chr8:138266778-138266816	2	AC	20	4	21,20,19,7	7	7	7	19	21	.	FAM135B	FAM135B	0	FAM135B_intron		cg00983122	chr8:138260316	-6481	.	FAM135B	FAM135B	.		245	-0.007617	0.18607	1.5953e-12	3.11669e-06		0	0	0	0
chr8:137970657-137970714	2	AT	29	15	39,38,37,36,35,34,33,32,31,30,29,28,27,26,17	17	29	30	34	39	.	LOC401478	LOC401478	0	LOC401478_intron		cg11479389	chr8:137934487	-36198.5	.	.	FAM135B	.		223	0.014884	0.16259	3.968e-10	0.000775216		1	0.605269	1.4852e-33	0.36635
chr8:137246732-137246839	2	AT	54	9	60,59,58,54,53,52,51,50,49	49	49	51	54	60	.	.	LOC101927915	159262	.		cg17571970	chr8:137219417	-27368.5	.	.	LOC101927915	.		225	0.008046	0.23849	6.9049e-15	1.34899e-08		0	0	0	0
chr8:135395107-135395179	2	CT	37	5	39,38,37,36,35	35	37	37	37	39	.	.	KHDRBS3	62277	.		cg14911175	chr8:135372817	-22326	.	.	LINC01591	.		244	-0.063734	0.26701	4.6566e-18	9.09746e-12		1	-0.434856	7.39586e-17	0.1891
chr8:134887046-134887075	2	GT	18	10	25,24,23,22,21,20,19,18,17,16	16	18	18	20	25	.	.	LOC101927845	5148	.		cg03411447	chr8:134891849	4788.5	.	.	LOC101927845	.		245	0.00849	0.18537	1.7746e-12	3.46698e-06		1	0.676964	4.58182e-59	0.45828
chr8:134887046-134887075	2	GT	18	10	25,24,23,22,21,20,19,18,17,16	16	18	18	20	25	.	.	LOC101927845	5148	.		cg24129307	chr8:134886886	-174.5	.	.	LOC101927845	.		244	-0.028018	0.31668	8.8104e-22	1.72126e-15		1	-0.608868	1.55864e-43	0.37072
chr8:133543794-133543823	3	ATC	10	3	11,10,9	9	9	10	10	11	.	ST3GAL1	ST3GAL1	0	ST3GAL1_intron		cg18980148	chr8:133540315	-3493.5	.	ST3GAL1	ST3GAL1	.		244	-0.179096	0.21732	1.4411e-14	2.81543e-08		1	-0.655011	5.53588e-54	0.42904
chr8:133542090-133542135	2	AC	23	5	24,23,22,21,19	19	22	23	23	24	.	ST3GAL1	ST3GAL1	0	ST3GAL1_intron		cg18980148	chr8:133540315	-1797.5	.	ST3GAL1	ST3GAL1	.		245	-0.088254	0.19761	2.7341e-13	5.34153e-07		1	-0.645817	1.80965e-51	0.41708
chr8:133365607-133365632	3	ATT	9	3	11,10,9	9	9.25	10	10	11	.	.	NDRG1	68304	.		cg03208466	chr8:133357077	-8542.5	.	.	NDRG1	.		245	-0.095718	0.25055	6.0993e-17	1.1916e-10		1	-0.634492	2.26693e-49	0.40258
chr8:133258226-133258245	2	AC	10	3	11,10,9	9	10	10	10	11	.	NDRG1	NDRG1	0	NDRG1_intron		cg03638613	chr8:133256068	-2167.5	.	NDRG1	NDRG1	.		242	-0.068694	0.25152	8.0865e-17	1.57984e-10		0	0	0	0
chr8:133217937-133217961	2	AC	13	12	27,26,25,24,23,22,21,19,18,15,14,13	13	13	24	24	27	.	CCN4	CCN4	0	CCN4_intron		cg10191240	chr8:133217858	-91	.	WISP1	WISP1	.		245	0.01359	0.58319	4.4303e-48	8.65534e-42		1	0.725479	1.50211e-69	0.52632
chr8:133087072-133087123	2	AC	26	12	27,26,25,24,23,22,21,20,19,18,17,16	16	18	22	23	27	.	SLA,TG	TG,SLA	0	SLA_intron,TG_intron		cg17281840	chr8:133094144	7046.5	.	SLA,TG	SLA	.		245	-0.011613	0.16552	3.492e-11	6.82222e-05		1	-0.553751	4.54247e-33	0.30664
chr8:133055825-133055872	3	AGC	16	6	19,17,16,15,9,8	8	8	9	16	19	.	PTCSC1,SLA,TG	TG,SLA,PTCSC1	0	PTCSC1_5utr,SLA_intron,TG_intron		cg01666088	chr8:133092235	36385.5	.	SLA,TG	SLA	.		243	-0.007899	0.14839	5.1157e-10	0.000999439		1	-0.335231	1.44192e-07	0.11238
chr8:133055825-133055872	3	AGC	16	6	19,17,16,15,9,8	8	8	9	16	19	.	PTCSC1,SLA,TG	TG,SLA,PTCSC1	0	PTCSC1_5utr,SLA_intron,TG_intron		cg17281840	chr8:133094144	38294.5	.	SLA,TG	SLA	.		245	-0.015866	0.40837	1.6007e-29	3.12724e-23		1	-0.721034	8.98747e-71	0.51989
chr8:133055347-133055407	2	AC	31	14	33,32,31,30,29,28,27,26,25,24,23,22,21,18	18	22	26	31	33	.	PTCSC1,SLA,TG	TG,SLA,PTCSC1	0	PTCSC1_5utr,SLA_intron,TG_intron		cg17281840	chr8:133094144	38766	.	SLA,TG	SLA	.		245	-0.013183	0.34746	2.5669e-24	5.01488e-18		1	-0.696915	2.66723e-64	0.48569
chr8:132986326-132986421	2	AT	51	3	52,51,40	40	51	51	51	52	.	TG	TG	0	TG_intron		cg08498833	chr8:132991651	5277.5	.	TG	TG	.		244	0.005626	0.33473	3.363e-23	6.57019e-17		1	0.412129	2.30275e-14	0.16985
chr8:13267730-13267772	2	GT	22	9	23,22,21,20,19,18,17,16,15	15	20	20	21	23	.	DLC1	DLC1	0	DLC1_intron		cg07538447	chr8:13258192	-9559	.	DLC1	DLC1	.		245	-0.040858	0.17059	1.6395e-11	3.20304e-05		1	-0.434856	7.38216e-17	0.1891
chr8:13264053-13264086	4	ATTT	10	8	16,15,14,13,12,11,10,9	9	10	13	14	16	.	DLC1	DLC1	0	DLC1_intron		cg07538447	chr8:13258192	-5877.5	.	DLC1	DLC1	.		245	0.040227	0.22164	6.4318e-15	1.25656e-08		1	0.379552	1.68085e-11	0.14406
chr8:13253432-13253451	2	GT	10	5	14,13,12,11,10	10	10	10	11	14	.	DLC1	DLC1	0	DLC1_intron		cg07538447	chr8:13258192	4750.5	.	DLC1	DLC1	.		245	0.05649	0.25091	5.7516e-17	1.12367e-10		0	0	0	0
chr8:13221681-13221745	2	GT/AT	33	12	40,38,36,35,34,33,32,31,30,29,28,27	27	33	33	34	40	.	DLC1	DLC1	0	DLC1_intron		cg08286051	chr8:13245224	23511	.	DLC1	DLC1	.		241	0.02049	0.15465	2.4495e-10	0.000478551		0	0	0	0
chr8:13097250-13097275	3	ATT	9	6	14,13,12,11,10,9	9	10	11	12	14	.	DLC1	DLC1	0	DLC1_intron		cg03653585	chr8:13087545	-9717.5	.	DLC1	DLC1	.		242	-0.025072	0.26211	1.4324e-17	2.79844e-11		1	-0.539212	6.86167e-31	0.29075
chr8:13057128-13057160	3	AAT	11	8	19,18,17,16,15,14,13,11	11	11	11	16	19	.	.	DLC1	26201	.		cg03653585	chr8:13087545	30401	.	DLC1	DLC1	.		242	0.008721	0.15956	1.1001e-10	0.000214923		1	0.369986	1.4502e-10	0.13689
chr8:130473668-130473702	2	AC/CT	18	8	25,24,22,21,20,19,18,16	16	18	19	24	25	.	.	ASAP1	29995	.		cg14976422	chr8:130465790	-7895	.	.	ASAP1	.		242	-0.017907	0.2449	2.354e-16	4.59894e-10		1	-0.614882	2.08567e-43	0.37808
chr8:130470462-130470477	2	GT	9	3	10,9,8	8	8	9	9	10	.	.	ASAP1	26789	.		cg14976422	chr8:130465790	-4679.5	.	.	ASAP1	.		242	0.093995	0.25484	4.7143e-17	9.21019e-11		1	0.642853	1.12566e-50	0.41326
chr8:130284843-130284922	2	AC/AG	40	11	50,46,45,44,43,42,41,40,39,38,37	37	40	40	41	50	.	ASAP1	ASAP1	0	ASAP1_intron		cg13954673	chr8:130284539	-343.5	.	ASAP1	ASAP1	.		245	0.033255	0.24542	1.4107e-16	2.75604e-10		1	0.369919	1.36638e-10	0.13684
chr8:12996937-12997009	5	ATTTT	15	11	16,15,14,13,12,11,10,9,8,7,6	6	9	11	12.25	16	.	TRMT9B	TRMT9B	0	TRMT9B_intron		cg14171607	chr8:13033834	36861	.	.	KIAA1456	.		244	-0.015278	0.15997	8.6703e-11	0.000169389		1	-0.383236	1.45302e-11	0.14687
chr8:129681563-129681596	4	ACAT	9	7	15,14,13,12,11,10,9	9	9	9	9	15	CCDC26	.	CCDC26	1325	.		cg00141498	chr8:129679110	-2469.5	CCDC26	CCDC26	CCDC26	.		245	-0.018147	0.19623	3.3795e-13	6.60243e-07		1	-0.674722	3.77672e-59	0.45525
chr8:129663759-129663815	2	AC/AT	29	7	32,31,30,29,28,26,25	25	29	29	31	32	.	CCDC26	CCDC26	0	CCDC26_intron		cg00141498	chr8:129679110	15323	CCDC26	CCDC26	CCDC26	.		244	0.01415	0.1587	1.0459e-10	0.000204334		1	0.395019	1.89065e-12	0.15604
chr8:129456109-129456180	2	CT/GT	38	15	47,46,45,44,43,42,41,40,39,38,37,36,34,33,32	32	38	41	43	47	.	CCDC26	CCDC26	0	CCDC26_intron		cg22285732	chr8:129414732	-41412.5	.	CCDC26	CCDC26	.		245	0.020741	0.14955	3.6662e-10	0.000716254		1	0.28463	0.000701298	0.081014
chr8:129430438-129430471	4	ATTT	9	4	13,12,11,9	9	9	11	11	13	.	CCDC26	CCDC26	0	CCDC26_intron		cg25391231	chr8:129415755	-14699.5	.	CCDC26	CCDC26	.		245	0.052792	0.38301	2.7104e-27	5.29523e-21		1	0.713078	1.35961e-67	0.50848
chr8:129430438-129430471	4	ATTT	9	4	13,12,11,9	9	9	11	11	13	.	CCDC26	CCDC26	0	CCDC26_intron		cg23468312	chr8:129414641	-15813.5	.	CCDC26	CCDC26	.		241	0.09297	0.60041	1.6397e-49	3.20343e-43		1	0.859372	1.5394e-131	0.73852
chr8:129430438-129430471	4	ATTT	9	4	13,12,11,9	9	9	11	11	13	.	CCDC26	CCDC26	0	CCDC26_intron		cg22285732	chr8:129414732	-15722.5	.	CCDC26	CCDC26	.		245	0.131674	0.65781	1.6304e-58	3.18526e-52		1	0.886194	1.61312e-151	0.78534
chr8:129418382-129418415	2	GT	17	5	21,20,19,18,17	17	17	19	19	21	.	CCDC26	CCDC26	0	CCDC26_intron		cg25391231	chr8:129415755	-2643.5	.	CCDC26	CCDC26	.		245	0.034089	0.24838	8.6994e-17	1.69958e-10		1	0.647271	1.89977e-51	0.41896
chr8:129418382-129418415	2	GT	17	5	21,20,19,18,17	17	17	19	19	21	.	CCDC26	CCDC26	0	CCDC26_intron		cg23468312	chr8:129414641	-3757.5	.	CCDC26	CCDC26	.		241	0.069221	0.5141	2.4996e-39	4.88339e-33		1	0.798367	5.77215e-100	0.63739
chr8:129418382-129418415	2	GT	17	5	21,20,19,18,17	17	17	19	19	21	.	CCDC26	CCDC26	0	CCDC26_intron		cg22285732	chr8:129414732	-3666.5	.	CCDC26	CCDC26	.		245	0.095069	0.53333	4.247e-42	8.29724e-36		1	0.815819	2.78879e-108	0.66556
chr8:129398615-129398633	2	AC	11	4	13,12,11,10	10	11	11	12	13	.	CCDC26	CCDC26	0	CCDC26_intron		cg25391231	chr8:129415755	17131	.	CCDC26	CCDC26	.		245	0.079378	0.20988	4.0834e-14	7.97762e-08		1	0.543415	7.34046e-32	0.2953
chr8:129398615-129398633	2	AC	11	4	13,12,11,10	10	11	11	12	13	.	CCDC26	CCDC26	0	CCDC26_intron		cg23468312	chr8:129414641	16017	.	CCDC26	CCDC26	.		241	0.136079	0.30922	5.8131e-21	1.13569e-14		1	0.586677	2.42607e-39	0.34419
chr8:129398615-129398633	2	AC	11	4	13,12,11,10	10	11	11	12	13	.	CCDC26	CCDC26	0	CCDC26_intron		cg22285732	chr8:129414732	16108	.	CCDC26	CCDC26	.		245	0.193275	0.34352	5.371e-24	1.04932e-17		1	0.595693	4.80066e-41	0.35485
chr8:129111492-129111525	4	AAAT	9	3	10,9,8	8	8	9	9	10	.	.	LINC00977	104942	.		cg14866167	chr8:129077217	-34291.5	.	.	LINC00977	.		245	0.09865	0.36346	1.232e-25	2.40692e-19		1	0.709838	6.1885e-69	0.50387
chr8:129090144-129090190	2	CT	25	5	31,29,28,26,25	25	25	25	26	31	.	.	LINC00976	124144	.		cg14866167	chr8:129077217	-12950	.	.	LINC00977	.		245	-0.039915	0.41533	3.7709e-30	7.36709e-24		1	-0.710971	1.08453e-58	0.50548
chr8:129089073-129089111	2	AC	20	9	26,24,23,22,21,20,19,18,17	17	20	20	21	26	.	.	LINC00976	123073	.		cg14866167	chr8:129077217	-11875	.	.	LINC00977	.		245	-0.026812	0.17879	4.7951e-12	9.36804e-06		1	-0.559509	5.04495e-34	0.31305
chr8:129040509-129040529	2	AG	11	3	11,10,9	9	10	10	10	11	.	.	LINC00976	74509	.		cg14866167	chr8:129077217	36698	.	.	LINC00977	.		245	-0.088112	0.17748	5.8406e-12	1.14106e-05		1	-0.51732	5.51318e-28	0.26762
chr8:128177879-128177901	2	GT	14	8	21,20,18,17,16,15,14,13	13	13	14	16	21	.	.	MIR1208	27692	.		cg07018107	chr8:128150160	-27730	MIR1208	MIR1208	MIR1208	.		245	-0.027998	0.45928	2.7011e-34	5.27706e-28		1	-0.617187	5.09174e-45	0.38092
chr8:127831044-127831076	2	GT/AT	17	5	18,17,16,15,14	14	16	16	17	18	.	PVT1	PVT1	0	PVT1_intron		cg16467921	chr8:127788862	-42198	.	.	PVT1	.		245	0.165978	0.14775	4.7656e-10	0.000931041		1	0.359625	7.69496e-10	0.12933
chr8:127831044-127831076	2	GT/AT	17	5	18,17,16,15,14	14	16	16	17	18	.	PVT1	PVT1	0	PVT1_intron		cg15197125	chr8:127847300	16240	.	PVT1	PVT1	.		243	0.055913	0.18401	2.6836e-12	5.24287e-06		1	0.43412	3.451e-17	0.18846
chr8:127817355-127817433	2	AT	40	3	40,39,38	38	39	40	40	40	.	PVT1	PVT1	0	PVT1_intron		cg16467921	chr8:127788862	-28532	.	.	PVT1	.		245	0.257817	0.3164	7.6443e-22	1.49344e-15		1	0.532898	1.28433e-29	0.28398
chr8:12781346-12781381	2	GT	18	5	22,21,20,19,18	18	18	18	21	22	.	LOC340357	LOC340357	0	LOC340357_intron		cg19931644	chr8:12765976	-15387.5	.	.	LOC340357	.		238	0.028398	0.16268	1.0044e-10	0.000196227		1	0.487329	2.37459e-23	0.23749
chr8:127801890-127801932	4	ATTT	11	4	11,10,9,8	8	9	9	10	11	.	PVT1	PVT1	0	PVT1_intron		cg16467921	chr8:127788862	-13049	.	.	PVT1	.		245	0.15421	0.21139	3.2274e-14	6.30527e-08		1	0.542439	7.41935e-32	0.29424
chr8:127793624-127793668	4	AAAT	11	7	13,12,11,10,9,8,6	6	8	10	11	13	PVT1	.	PVT1	865	.		cg16467921	chr8:127788862	-4784	.	.	PVT1	.		245	0.128509	0.71119	1.7651e-67	3.44842e-61		1	0.879739	3.70096e-150	0.77394
chr8:127792273-127792317	4	AAAC	11	4	11,10,9,8	8	8	10	10	11	.	.	PVT1	2216	.		cg16467921	chr8:127788862	-3433	.	.	PVT1	.		245	0.205509	0.8036	7.4621e-88	1.45785e-81		1	0.924316	4.50841e-197	0.85436
chr8:127785794-127785820	4	AAAC	7	4	9,8,7,6	6	7	7	8	9	.	.	PVT1	8713	.		cg16467921	chr8:127788862	3055	.	.	PVT1	.		245	-0.30882	0.63175	1.2398e-54	2.42216e-48		1	-0.840815	6.11059e-123	0.70697
chr8:127774643-127774672	4	AGAT	8	8	16,15,14,13,12,11,10,8	8	8	10	10	16	.	.	PVT1	19861	.		cg16467921	chr8:127788862	14204.5	.	.	PVT1	.		245	-0.061454	0.20311	1.17e-13	2.28579e-07		1	-0.537606	1.0296e-30	0.28902
chr8:127769135-127769169	2	AT	20	18	31,30,29,28,27,26,25,24,23,22,21,20,19,18,17,15,14,13	13	21	25	28	31	.	.	PVT1	25364	.		cg16467921	chr8:127788862	19710	.	.	PVT1	.		226	-0.033035	0.31896	1.9315e-20	3.77351e-14		1	-0.465102	5.50828e-13	0.21632
chr8:12776686-12776739	2	AT/AG	28	10	41,40,39,38,37,36,35,34,29,28	28	36	36	39	41	.	LOC340357	LOC340357	0	LOC340357_intron		cg19931644	chr8:12765976	-10736.5	.	.	LOC340357	.		238	0.013343	0.18261	5.5377e-12	1.08188e-05		1	0.452283	2.19959e-18	0.20456
chr8:12774555-12774626	2	GT/AT	37	20	53,52,51,50,49,48,47,46,45,44,43,42,41,40,39,38,37,36,35,34	34	42	44	50	53	.	LOC340357	LOC340357	0	LOC340357_intron		cg19931644	chr8:12765976	-8614.5	.	.	LOC340357	.		234	0.010854	0.23494	3.4344e-15	6.70968e-09		1	0.606811	1.67051e-34	0.36822
chr8:1270693-1270721	2	GT	15	6	16,15,14,12,9,8	8	14	14	14	16	.	DLGAP2	DLGAP2	0	DLGAP2_intron		cg00154902	chr8:1297443	24996	.	LOC286083	LOC286083	CpG:_58_Island		245	0.155328	0.19855	2.3643e-13	4.61906e-07		1	0.563258	1.79193e-21	0.31726
chr8:126470112-126470138	2	GT	14	9	22,21,20,19,18,17,16,15,14	14	18	19	19	22	.	.	LRATD2	82305	.		cg12374796	chr8:126429208	-40917	.	.	LOC101927657	.		245	-0.028122	0.19549	3.7842e-13	7.39308e-07		0	0	0	0
chr8:125106048-125106072	2	AC	13	8	18,17,16,15,14,13,12,11	11	13	13	15	18	.	NSMCE2	NSMCE2	0	NSMCE2_intron		cg03327945	chr8:125070877	-35183	.	KIAA0196	KIAA0196	.		245	0.020055	0.15555	1.5207e-10	0.000297095		0	0	0	0
chr8:125106048-125106072	2	AC	13	8	18,17,16,15,14,13,12,11	11	13	13	15	18	.	NSMCE2	NSMCE2	0	NSMCE2_intron		cg08270491	chr8:125088501	-17559	.	KIAA0196	KIAA0196	CpG:_39_Shelf_N		242	0.097604	0.4268	7.7774e-31	1.51945e-24		1	0.770071	6.77417e-88	0.59301
chr8:125079103-125079140	2	GT/AT	23	17	35,34,33,32,31,30,29,28,27,26,25,24,23,22,21,19,18	18	24	24	29	35	.	WASHC5	WASHC5	0	WASHC5_intron		cg08270491	chr8:125088501	9379.5	.	KIAA0196	KIAA0196	CpG:_39_Shelf_N		224	0.029315	0.30025	5.9448e-19	1.16142e-12		1	0.63383	1.29568e-30	0.40174
chr8:125052600-125052640	2	AC	21	10	29,28,27,26,25,24,23,22,21,20	20	22	22	26	29	.	WASHC5	WASHC5	0	WASHC5_intron		cg08270491	chr8:125088501	35881	.	KIAA0196	KIAA0196	CpG:_39_Shelf_N		242	0.041072	0.37561	2.3735e-26	4.63704e-20		1	0.710373	1.44359e-67	0.50463
chr8:124256772-124256825	2	AC	27	12	29,28,27,26,25,24,23,22,21,20,19,18	18	20	25	25	29	.	.	LOC101927588	9375	.		cg04043131	chr8:124267231	10432.5	.	.	LOC101927588	.		243	-0.014375	0.21578	2.0763e-14	4.05641e-08		1	-0.594702	5.36245e-40	0.35367
chr8:124253787-124253809	2	AC	15	6	21,20,19,18,16,15	15	15	15	19	21	.	.	LOC101927588	6390	.		cg04043131	chr8:124267231	13433	.	.	LOC101927588	.		244	0.016278	0.1578	1.1931e-10	0.000233092		1	0.567627	3.7959e-35	0.3222
chr8:123423436-123423454	4	CTTT	5	3	5,4,3	3	3	5	5	5	.	WDYHV1	WDYHV1	0	WDYHV1_intron		cg21495321	chr8:123417552	-5893	WDYHV1	WDYHV1	WDYHV1	CpG:_80_Shore_S		243	0.043019	0.2792	7.0733e-19	1.38189e-12		1	0.428462	2.70677e-16	0.18358
chr8:123419734-123419830	4	CCCT	24	4	30,29,25,24	24	24	29	29	30	.	WDYHV1	WDYHV1	0	WDYHV1_intron		cg21495321	chr8:123417552	-2230	WDYHV1	WDYHV1	WDYHV1	CpG:_80_Shore_S		217	-0.015574	0.27033	1.9959e-16	3.89933e-10		0	0	0	0
chr8:123402816-123402844	3	AAT	10	6	13,12,11,10,9,8	8	9	9	10	13	.	.	ATAD2	6370	.		cg21495321	chr8:123417552	14722	WDYHV1	WDYHV1	WDYHV1	CpG:_80_Shore_S		245	0.026321	0.1858	1.6619e-12	3.2468e-06		1	0.406719	3.55122e-14	0.16542
chr8:123177016-123177052	2	AT/AC	19	6	23,21,20,19,18,12	12	19	19	19	23	FAM83A	.	FAM83A	1995	.		cg19924352	chr8:123183162	6128	FAM83A	FAM83A	FAM83A	.		232	0.012643	0.16172	1.9792e-10	0.00038667		1	0.383014	4.32735e-11	0.1467
chr8:123177016-123177052	2	AT/AC	19	6	23,21,20,19,18,12	12	19	19	19	23	FAM83A	.	FAM83A	1995	.		cg26140120	chr8:123207335	30301	.	FAM83A	FAM83A	CpG:_38_Island		232	-0.029961	0.19665	1.3504e-12	2.63824e-06		1	-0.523163	2.99902e-27	0.2737
chr8:123177016-123177052	2	AT/AC	19	6	23,21,20,19,18,12	12	19	19	19	23	FAM83A	.	FAM83A	1995	.		cg24833277	chr8:123182121	5087	FAM83A	FAM83A	FAM83A	.		228	0.014349	0.22412	3.887e-14	7.59392e-08		1	0.665515	1.73143e-53	0.44291
chr8:123177016-123177052	2	AT/AC	19	6	23,21,20,19,18,12	12	19	19	19	23	FAM83A	.	FAM83A	1995	.		cg03789719	chr8:123182004	4970	FAM83A	FAM83A	FAM83A	.		232	0.023264	0.25307	2.7596e-16	5.39135e-10		1	0.580706	2.34856e-36	0.33722
chr8:123177016-123177052	2	AT/AC	19	6	23,21,20,19,18,12	12	19	19	19	23	FAM83A	.	FAM83A	1995	.		cg22384356	chr8:123182952	5918	FAM83A	FAM83A	FAM83A	.		231	0.04303	0.28271	2.9396e-18	5.74301e-12		1	0.649769	5.4337e-50	0.4222
chr8:123177016-123177052	2	AT/AC	19	6	23,21,20,19,18,12	12	19	19	19	23	FAM83A	.	FAM83A	1995	.		cg03531754	chr8:123182072	5038	FAM83A	FAM83A	FAM83A	.		232	0.014899	0.28488	1.7467e-18	3.41248e-12		1	0.710366	2.86983e-65	0.50462
chr8:123177016-123177052	2	AT/AC	19	6	23,21,20,19,18,12	12	19	19	19	23	FAM83A	.	FAM83A	1995	.		cg26820168	chr8:123205656	28622	.	FAM83A	FAM83A	CpG:_38_Shore_N		230	-0.027829	0.31346	2.2385e-20	4.37329e-14		1	-0.557548	2.14283e-32	0.31086
chr8:123177016-123177052	2	AT/AC	19	6	23,21,20,19,18,12	12	19	19	19	23	FAM83A	.	FAM83A	1995	.		cg27053337	chr8:123205458	28424	.	FAM83A	FAM83A	CpG:_38_Shore_N		232	-0.031278	0.35058	2.4283e-23	4.7441e-17		1	-0.547101	7.99406e-31	0.29932
chr8:123177016-123177052	2	AT/AC	19	6	23,21,20,19,18,12	12	19	19	19	23	FAM83A	.	FAM83A	1995	.		cg04398409	chr8:123183195	6161	FAM83A	FAM83A	FAM83A	.		232	0.02585	0.36448	1.9792e-24	3.8667e-18		1	0.597378	2.98747e-39	0.35686
chr8:123177016-123177052	2	AT/AC	19	6	23,21,20,19,18,12	12	19	19	19	23	FAM83A	.	FAM83A	1995	.		cg10955352	chr8:123182976	5942	FAM83A	FAM83A	FAM83A	.		231	0.03686	0.42055	5.9175e-29	1.15608e-22		1	0.709493	5.08175e-65	0.50338
chr8:123177016-123177052	2	AT/AC	19	6	23,21,20,19,18,12	12	19	19	19	23	FAM83A	.	FAM83A	1995	.		cg23067535	chr8:123182893	5859	FAM83A	FAM83A	FAM83A	.		231	0.048865	0.43299	4.8654e-30	9.50539e-24		1	0.744426	1.00382e-75	0.55417
chr8:123167992-123168062	2	AC/AG	38	16	44,43,42,41,40,39,38,37,36,34,33,32,31,30,29,28	28	38	40	40	44	.	.	TBC1D31	2820	.		cg20452672	chr8:123192814	24787	.	FAM83A	FAM83A	.		234	0.005498	0.15498	4.27e-10	0.000834217		0	0	0	0
chr8:123167992-123168062	2	AC/AG	38	16	44,43,42,41,40,39,38,37,36,34,33,32,31,30,29,28	28	38	40	40	44	.	.	TBC1D31	2820	.		cg03789719	chr8:123182004	13977	FAM83A	FAM83A	FAM83A	.		240	0.00932	0.1634	7.5454e-11	0.000147412		1	0.444713	1.58311e-17	0.19777
chr8:123167992-123168062	2	AC/AG	38	16	44,43,42,41,40,39,38,37,36,34,33,32,31,30,29,28	28	38	40	40	44	.	.	TBC1D31	2820	.		cg04116385	chr8:123178974	10947	FAM83A	.	FAM83A	.		240	0.009009	0.19087	1.3179e-12	2.57474e-06		1	0.50546	4.84373e-25	0.25549
chr8:123167992-123168062	2	AC/AG	38	16	44,43,42,41,40,39,38,37,36,34,33,32,31,30,29,28	28	38	40	40	44	.	.	TBC1D31	2820	.		cg14946913	chr8:123179001	10974	FAM83A	.	FAM83A	.		240	0.009905	0.26279	1.7454e-17	3.40994e-11		1	0.560437	2.8344e-33	0.31409
chr8:123167992-123168062	2	AC/AG	38	16	44,43,42,41,40,39,38,37,36,34,33,32,31,30,29,28	28	38	40	40	44	.	.	TBC1D31	2820	.		cg09253736	chr8:123171974	3947	.	.	FAM83A	.		240	0.010519	0.42948	7.765e-31	1.51702e-24		1	0.629484	4.55402e-46	0.39625
chr8:123157709-123157742	2	CG/AC	20	6	28,27,26,22,21,20	20	20	21	21	28	.	TBC1D31	TBC1D31	0	TBC1D31_intron		cg24833277	chr8:123182121	24395.5	FAM83A	FAM83A	FAM83A	.		240	-0.015374	0.15566	2.309e-10	0.000451102		1	-0.643887	6.55807e-51	0.41459
chr8:123157709-123157742	2	CG/AC	20	6	28,27,26,22,21,20	20	20	21	21	28	.	TBC1D31	TBC1D31	0	TBC1D31_intron		cg26820168	chr8:123205656	47930.5	.	FAM83A	FAM83A	CpG:_38_Shore_N		242	0.027651	0.18239	3.7886e-12	7.40167e-06		1	0.541332	2.24246e-31	0.29304
chr8:123157709-123157742	2	CG/AC	20	6	28,27,26,22,21,20	20	20	21	21	28	.	TBC1D31	TBC1D31	0	TBC1D31_intron		cg27053337	chr8:123205458	47732.5	.	FAM83A	FAM83A	CpG:_38_Shore_N		244	0.02996	0.19099	8.3966e-13	1.64042e-06		1	0.530406	9.58723e-30	0.28133
chr8:123157709-123157742	2	CG/AC	20	6	28,27,26,22,21,20	20	20	21	21	28	.	TBC1D31	TBC1D31	0	TBC1D31_intron		cg22384356	chr8:123182952	25226.5	FAM83A	FAM83A	FAM83A	.		243	-0.046478	0.19405	5.8792e-13	1.1486e-06		1	-0.628196	1.50296e-47	0.39463
chr8:123157709-123157742	2	CG/AC	20	6	28,27,26,22,21,20	20	20	21	21	28	.	TBC1D31	TBC1D31	0	TBC1D31_intron		cg03531754	chr8:123182072	24346.5	FAM83A	FAM83A	FAM83A	.		244	-0.01693	0.22928	2.1792e-15	4.25744e-09		1	-0.657609	3.08378e-54	0.43245
chr8:123157709-123157742	2	CG/AC	20	6	28,27,26,22,21,20	20	20	21	21	28	.	TBC1D31	TBC1D31	0	TBC1D31_intron		cg04398409	chr8:123183195	25469.5	FAM83A	FAM83A	FAM83A	.		244	-0.027795	0.25929	1.6792e-17	3.2806e-11		1	-0.578559	1.12959e-37	0.33473
chr8:123157709-123157742	2	CG/AC	20	6	28,27,26,22,21,20	20	20	21	21	28	.	TBC1D31	TBC1D31	0	TBC1D31_intron		cg23067535	chr8:123182893	25167.5	FAM83A	FAM83A	FAM83A	.		243	-0.057827	0.34049	1.4374e-23	2.80821e-17		1	-0.735377	3.52734e-76	0.54078
chr8:123157709-123157742	2	CG/AC	20	6	28,27,26,22,21,20	20	20	21	21	28	.	TBC1D31	TBC1D31	0	TBC1D31_intron		cg10955352	chr8:123182976	25250.5	FAM83A	FAM83A	FAM83A	.		243	-0.044349	0.34445	6.9127e-24	1.35051e-17		1	-0.687532	7.34614e-62	0.4727
chr8:121233722-121233738	2	GT	9	3	10,9,8	8	8	8	9	10	.	.	HAS2	378378	.		cg04216046	chr8:121212388	-21342	.	.	SNTB1	.		245	0.184294	0.45462	7.7033e-34	1.50497e-27		1	0.813222	1.22556e-108	0.66133
chr8:121216633-121216668	2	AG	18	10	22,20,19,18,17,16,14,13,12,9	9	14	14	18	22	.	.	HAS2	395448	.		cg04216046	chr8:121212388	-4262.5	.	.	SNTB1	.		245	0.041616	0.44439	7.4531e-33	1.45609e-26		1	0.797534	1.36869e-99	0.63606
chr8:121195270-121195315	2	GT	23	12	26,25,24,23,22,21,20,19,18,17,16,12	12	19	21	22	26	.	.	SNTB1	383225	.		cg04216046	chr8:121212388	17095.5	.	.	SNTB1	.		245	0.028243	0.19158	6.8916e-13	1.34639e-06		1	0.535733	2.01873e-30	0.28701
chr8:120995308-120995325	2	GT	9	3	10,9,8	8	8	9	9	10	.	.	SNTB1	183263	.		cg05219430	chr8:120993391	-1925.5	.	.	SNTB1	.		244	-0.033617	0.25057	7.0419e-17	1.37575e-10		1	-0.372183	7.92476e-11	0.13852
chr8:1202242-1202313	2	GT	36	9	41,38,37,36,35,34,33,32,31	31	34	35	35	41	.	DLGAP2	DLGAP2	0	DLGAP2_intron		cg13173255	chr8:1206483	4205.5	.	.	ERICH1-AS1	.		216	0.03799	0.22	3.2511e-13	6.35158e-07		1	0.48296	5.77293e-22	0.23325
chr8:119866185-119866221	4	AAAT	9	6	11,10,9,8,7,6	6	8	9	9	11	.	.	DEPTOR	7434	.		cg21029035	chr8:119856511	-9692	DSCC1	.	DSCC1	CpG:_73_Shore_S		244	0.025626	0.17798	5.9884e-12	1.16994e-05		0	0	0	0
chr8:119861486-119861510	4	AATG	6	3	8,7,6	6	6	6	6	8	.	.	DSCC1	5593	.		cg21029035	chr8:119856511	-4987	DSCC1	.	DSCC1	CpG:_73_Shore_S		244	-0.098868	0.24953	8.3407e-17	1.6295e-10		1	-0.296333	5.91269e-05	0.087813
chr8:119627866-119627889	2	AT	13	6	16,15,14,13,12,11	11	12	12	13	16	.	ENPP2	ENPP2	0	ENPP2_intron		cg23155467	chr8:119579280	-48597.5	.	ENPP2	ENPP2	.		245	-0.032973	0.15263	2.3342e-10	0.000456026		0	0	0	0
chr8:119627866-119627889	2	AT	13	6	16,15,14,13,12,11	11	12	12	13	16	.	ENPP2	ENPP2	0	ENPP2_intron		cg02534163	chr8:119638754	10876.5	ENPP2	ENPP2	ENPP2	.		245	0.029322	0.16913	2.0403e-11	3.98607e-05		1	0.4114	9.73639e-15	0.16925
chr8:119404632-119404741	4	AGAT	28	15	31,30,29,28,27,26,25,24,23,22,21,20,19,18,17	17	25	27	28	31	.	.	CCN3	11705	.		cg00614011	chr8:119424239	19552.5	.	NOV	NOV	.		237	0.007528	0.18566	3.9247e-12	7.66757e-06		1	0.456278	1.85444e-19	0.20819
chr8:119398848-119398895	2	GT	24	11	27,26,25,24,23,22,21,20,19,18,15	15	21	23	24	27	.	.	CCN3	17551	.		cg00614011	chr8:119424239	25367.5	.	NOV	NOV	.		237	0.010879	0.17074	3.4493e-11	6.73879e-05		1	0.372465	1.85714e-10	0.13873
chr8:11939478-11939543	4	CTTT	17	13	20,19,18,17,16,15,14,12,11,10,9,7,6	6	6	6	15	20	.	.	DEFB136	34394	.		cg16201336	chr8:11897597	-41913.5	.	.	CTSB	.		230	0.018982	0.30821	5.3807e-20	1.05121e-13		1	0.627662	1.2976e-43	0.39396
chr8:119102211-119102287	4	CCCT/CCTT	20	5	20,19,18,17,15	15	17	17	19	20	.	COLEC10	COLEC10	0	COLEC10_intron		cg18468919	chr8:119072110	-30139	.	COLEC10	COLEC10	.		195	-0.081219	0.5717	2.1978e-37	4.29378e-31		1	-0.80035	3.33335e-57	0.64056
chr8:119091555-119091636	4	AAAG	22	10	27,26,25,24,23,22,21,20,19,18	18	19	19	22	27	.	COLEC10	COLEC10	0	COLEC10_intron		cg18468919	chr8:119072110	-19485.5	.	COLEC10	COLEC10	.		245	-0.050051	0.42915	2.03e-31	3.96595e-25		1	-0.694118	3.17676e-59	0.4818
chr8:119078991-119079044	2	AC	28	15	30,29,28,27,26,25,24,23,22,21,20,19,18,17,16	16	18	18	25	30	.	COLEC10	COLEC10	0	COLEC10_intron		cg18468919	chr8:119072110	-6907.5	.	COLEC10	COLEC10	.		245	-0.024585	0.616	2.0361e-52	3.97787e-46		1	-0.830042	2.9998e-116	0.68897
chr8:118951521-118951567	2	CT	24	3	25,24,23	23	23	23	24	25	COLEC10,TNFRSF11B	TNFRSF11B	TNFRSF11B	0	TNFRSF11B_intron		cg17171407	chr8:118948538	-3006	.	TNFRSF11B	TNFRSF11B	CpG:_18_Shelf_N,CpG:_24_Shelf_N		243	-0.084528	0.31048	3.2042e-21	6.25995e-15		1	-0.669657	8.24461e-57	0.44844
chr8:118912687-118912716	2	GT	15	11	22,21,20,19,18,17,16,15,14,13,12	12	15	16	19	22	.	.	TNFRSF11B	10841	.		cg17171407	chr8:118948538	35836.5	.	TNFRSF11B	TNFRSF11B	CpG:_18_Shelf_N,CpG:_24_Shelf_N		235	-0.016052	0.21778	4.1257e-14	8.06026e-08		1	-0.574134	7.79616e-36	0.32963
chr8:11762547-11762587	2	AC	21	5	23,22,21,20,11	11	20	22	22	23	.	C8orf49	C8orf49	0	C8orf49_3utr		cg09232555	chr8:11762357	-210	C8orf49	C8orf49	C8orf49	.		223	-0.109684	0.18256	2.6102e-11	5.09947e-05		1	-0.535462	1.84715e-28	0.28672
chr8:116484298-116484377	2	AT	40	22	51,48,47,46,45,44,43,42,41,40,39,38,37,36,35,34,33,32,31,30,29,28	28	32	39	46	51	.	.	EIF3H	157755	.		cg09365932	chr8:116471950	-12387.5	.	.	LINC00536	.		222	0.004374	0.18813	1.3437e-11	2.62515e-05		1	0.524652	1.02929e-19	0.27526
chr8:11574560-11574582	2	AC	12	4	14,13,12,11	11	12	13	13	14	LINC00208	.	LINC00208	1953	.		cg21505585	chr8:11573650	-921	.	.	LINC00208	.		245	-0.081714	0.15507	1.6322e-10	0.000318878		1	-0.351625	5.59578e-09	0.12364
chr8:11574560-11574582	2	AC	12	4	14,13,12,11	11	12	13	13	14	LINC00208	.	LINC00208	1953	.		cg25696586	chr8:11524738	-49833	.	BLK	BLK	.		243	-0.091997	0.19638	4.1233e-13	8.05557e-07		1	-0.522714	2.27085e-28	0.27323
chr8:11520477-11520549	6	AAAAAG	13	4	14,13,12,11	11	12	13	13	14	.	BLK	BLK	0	BLK_intron		cg25696586	chr8:11524738	4225	.	BLK	BLK	.		163	-0.074054	0.22968	9.6748e-11	0.000189014		0	0	0	0
chr8:11422356-11422405	2	GT	25	18	35,33,32,31,30,29,28,27,26,25,24,23,22,21,20,18,17,11	11	24	25	25	35	.	FAM167A,FAM167A-AS1	FAM167A-AS1,FAM167A	0	FAM167A-AS1_intron,FAM167A_3utr		cg02771117	chr8:11421843	-537.5	.	FAM167A,FAM167A-AS1	FAM167A-AS1	.		244	-0.030892	0.47935	3.7068e-36	7.24186e-30		1	-0.784283	6.38797e-91	0.6151
chr8:11234290-11234345	2	AC/AT/AC	28	9	39,35,34,33,32,31,30,29,28	28	28	32	32	39	.	.	XKR6	32458	.		cg11902992	chr8:11247375	13057.5	.	.	MTMR9	.		244	0.024297	0.22525	4.1282e-15	8.06514e-09		1	0.536787	1.07772e-29	0.28814
chr8:111659747-111659768	2	AT	11	4	11,10,9,8	8	9	9	10	11	.	.	LINC02237	189131	.		cg10400998	chr8:111680367	20609.5	.	.	LINC01609	.		240	-0.062439	0.22653	5.6773e-15	1.10916e-08		1	-0.609975	7.65875e-43	0.37207
chr8:111658725-111658839	4	CCCT/CCTT	29	10	30,29,28,27,26,25,24,23,22,20	20	25	26	27	30	.	.	LINC02237	188109	.		cg10400998	chr8:111680367	21585	.	.	LINC01609	.		232	-0.024104	0.17813	1.9479e-11	3.80555e-05		0	0	0	0
chr8:109347521-109347546	2	AC	13	10	20,19,18,17,16,15,14,13,12,11	11	13	13	16	20	.	.	ENY2	1568	.		cg15640508	chr8:109355175	7641.5	.	.	PKHD1L1	.		245	-0.010367	0.15531	1.5771e-10	0.000308113		0	0	0	0
chr8:10912448-10912509	2	AT/AG/GT	31	5	32,31,30,29,28	28	29	31	31	32	.	XKR6	XKR6	0	XKR6_intron		cg06325495	chr8:10910235	-2243.5	.	XKR6	XKR6	.		185	0.011747	0.19442	3.3548e-10	0.000655417		1	0.510539	3.72896e-24	0.26065
chr8:109086549-109086600	2	GT	28	5	30,29,28,27,26	26	26	26	28	30	TRHR	.	TRHR	28	.		cg04843627	chr8:109065893	-20681.5	.	.	TRHR	.		239	0.057826	0.35257	3.6615e-24	7.15336e-18		1	0.689094	1.00834e-61	0.47485
chr8:109042974-109042999	4	CTTT	7	3	8,7,6	6	6	6	7	8	.	.	TRHR	43629	.		cg04843627	chr8:109065893	22906.5	.	.	TRHR	.		239	0.138809	0.46031	1.38e-33	2.69606e-27		1	0.790841	1.75161e-97	0.62543
chr8:109039272-109039288	2	GT	9	5	13,12,11,10,9	9	9	12	12	13	.	.	TRHR	47340	.		cg04843627	chr8:109065893	26613	.	.	TRHR	.		239	-0.042687	0.45061	1.1515e-32	2.24965e-26		1	-0.768759	1.39661e-87	0.59099
chr8:109016900-109016914	2	AT	13	15	27,26,25,24,23,22,21,20,19,18,17,16,15,14,13	13	13	17	20	27	.	.	TRHR	69714	.		cg04843627	chr8:109065893	48986	.	.	TRHR	.		239	-0.014938	0.31053	6.7347e-21	1.31574e-14		1	-0.614939	1.37241e-42	0.37815
chr8:108959053-108959076	2	AC	13	5	14,13,12,11,10	10	11	13	13	14	.	.	TRHR	127552	.		cg20190576	chr8:108942994	-16070.5	.	.	TRHR	.		245	0.127279	0.48764	3.7719e-37	7.36905e-31		1	0.755387	5.9998e-83	0.57061
chr8:108923710-108923753	2	GT	24	13	31,30,29,28,27,26,25,24,23,22,21,20,15	15	24	24	26	31	.	.	TMEM74	136117	.		cg20190576	chr8:108942994	19262.5	.	.	TRHR	.		245	-0.049631	0.40188	6.0754e-29	1.18693e-22		1	-0.685193	2.6872e-59	0.46949
chr8:108921371-108921505	2	AT/AC/AT	68	3	69,68,66	66	68	68	68	69	.	.	TMEM74	133778	.		cg20190576	chr8:108942994	21556	.	.	TRHR	.		184	-0.164048	0.19454	3.6943e-10	0.000721744		0	0	0	0
chr8:107879182-107879219	2	GT	19	8	21,20,19,18,17,16,15,14	14	15	19	19	21	.	.	RSPO2	20097	.		cg07191311	chr8:107883649	4448.5	.	.	RSPO2	.		245	0.023481	0.23976	3.5365e-16	6.90915e-10		1	0.603581	1.39854e-42	0.36431
chr8:107857401-107857499	2	AG/GT	50	12	59,58,57,56,55,54,52,51,50,49,48,47	47	50	50	55	59	.	.	RSPO2	41817	.		cg07191311	chr8:107883649	26199	.	.	RSPO2	.		245	-0.014318	0.18299	2.5453e-12	4.97268e-06		1	-0.530679	1.79082e-27	0.28162
chr8:107844188-107844235	5	ACATC	10	8	13,12,11,10,9,8,7,6	6	8	10	10	13	.	.	RSPO2	55081	.		cg07191311	chr8:107883649	39437.5	.	.	RSPO2	.		245	0.029361	0.18662	1.4679e-12	2.86779e-06		1	0.519298	5.28337e-28	0.26967
chr8:10735244-10735288	2	AC	23	15	32,31,30,29,28,27,26,25,24,23,22,21,20,19,18	18	19	22	22	32	.	LOC102723313	LOC102723313	0	LOC102723313_intron		cg20449619	chr8:10724274	-10992	.	SOX7	SOX7	CpG:_33_Shelf_N		245	-0.006961	0.18786	1.2159e-12	2.37547e-06		0	0	0	0
chr8:107009710-107009794	2	AT/GT/AC	43	15	59,57,54,53,52,51,50,49,48,47,45,43,42,39,22	22	43	48	50	59	.	.	ABRA	239467	.		cg00977901	chr8:107020263	10511	.	.	ANGPT1	.		243	0.003883	0.2055	1.0197e-13	1.99216e-07		0	0	0	0
chr8:107006228-107006250	3	AAC	8	3	10,9,8	8	8	9	9	10	.	.	ABRA	235985	.		cg00977901	chr8:107020263	14024	.	.	ANGPT1	.		243	0.03398	0.26607	6.3761e-18	1.24568e-11		0	0	0	0
chr8:106739076-106739120	2	AC	23	18	33,32,31,30,29,28,27,26,25,24,23,22,21,20,19,18,17,14	14	21	21	25	33	.	OXR1	OXR1	0	OXR1_intron		cg06713767	chr8:106730484	-8614	.	OXR1	OXR1	.		242	-0.008109	0.24886	1.243e-16	2.42841e-10		1	-0.357673	2.27731e-09	0.12793
chr8:10672386-10672421	2	GT	19	12	22,21,20,19,18,17,16,15,14,13,12,11	11	14	14	15	22	C8orf74	.	C8orf74	207	.		cg03790427	chr8:10672613	209.5	C8orf74	.	C8orf74	.		244	-0.011453	0.17547	8.7191e-12	1.70342e-05		0	0	0	0
chr8:10672386-10672421	2	GT	19	12	22,21,20,19,18,17,16,15,14,13,12,11	11	14	14	15	22	C8orf74	.	C8orf74	207	.		cg00870242	chr8:10672638	234.5	C8orf74	C8orf74	C8orf74	.		244	-0.00934	0.1954	4.2865e-13	8.37441e-07		1	-0.301907	3.22628e-05	0.091148
chr8:10672386-10672421	2	GT	19	12	22,21,20,19,18,17,16,15,14,13,12,11	11	14	14	15	22	C8orf74	.	C8orf74	207	.		cg14182145	chr8:10672573	169.5	C8orf74	.	C8orf74	.		244	-0.0082	0.20888	5.3786e-14	1.0508e-07		1	-0.369473	1.4955e-10	0.13651
chr8:106691610-106691642	2	AT	18	7	21,20,19,18,17,16,6	6	17	17	18	21	.	OXR1	OXR1	0	OXR1_intron		cg06713767	chr8:106730484	38858	.	OXR1	OXR1	.		242	-0.025841	0.29315	7.8129e-20	1.52638e-13		1	-0.436692	1.77091e-17	0.1907
chr8:106626045-106626069	2	GT	13	7	19,18,17,15,14,13,12	12	13	14	14	19	.	OXR1	OXR1	0	OXR1_intron		cg25264181	chr8:106618031	-8026	.	OXR1	OXR1	.		242	-0.053056	0.27007	3.8461e-18	7.51401e-12		1	-0.492148	1.09175e-23	0.24221
chr8:106626045-106626069	2	GT	13	7	19,18,17,15,14,13,12	12	13	14	14	19	.	OXR1	OXR1	0	OXR1_intron		cg07986251	chr8:106617905	-8152	.	OXR1	OXR1	.		241	-0.049833	0.273	2.7734e-18	5.41831e-12		1	-0.468786	1.04747e-20	0.21976
chr8:106606289-106606318	4	ATTT	8	6	13,12,11,10,9,8	8	8	9	10	13	.	OXR1	OXR1	0	OXR1_intron		cg07986251	chr8:106617905	11601.5	.	OXR1	OXR1	.		244	-0.050419	0.27755	7.9319e-19	1.54963e-12		1	-0.525367	7.75447e-29	0.27601
chr8:106606289-106606318	4	ATTT	8	6	13,12,11,10,9,8	8	8	9	10	13	.	OXR1	OXR1	0	OXR1_intron		cg25264181	chr8:106618031	11727.5	.	OXR1	OXR1	.		245	-0.054848	0.28601	1.5837e-19	3.09403e-13		1	-0.560152	2.23463e-34	0.31377
chr8:106420731-106420759	2	GT	15	10	23,22,21,20,19,18,17,16,15,14	14	15	15	18	23	.	OXR1	OXR1	0	OXR1_intron		cg10066109	chr8:106434919	14174	.	OXR1	OXR1	.		243	0.048819	0.27318	1.9484e-18	3.80653e-12		1	0.55874	2.19705e-34	0.31219
chr8:106415571-106415601	2	AG	16	5	24,21,20,19,16	16	16	16	20	24	.	OXR1	OXR1	0	OXR1_intron		cg10066109	chr8:106434919	19333	.	OXR1	OXR1	.		243	0.051175	0.31195	2.4686e-21	4.82283e-15		1	0.50704	3.63206e-26	0.25709
chr8:106415494-106415526	2	GT	17	5	20,19,18,17,16	16	17	17	18	20	.	OXR1	OXR1	0	OXR1_intron		cg10066109	chr8:106434919	19409	.	OXR1	OXR1	.		243	0.09078	0.15189	3.0809e-10	0.000601906		1	0.438121	1.35748e-17	0.19195
chr8:106405142-106405240	2	AT/GT	50	21	50,48,46,45,44,43,42,41,40,39,38,37,36,35,34,33,32,31,30,28,27	27	33	37	39	50	.	OXR1	OXR1	0	OXR1_intron		cg10066109	chr8:106434919	29728	.	OXR1	OXR1	.		230	-0.020333	0.37851	2.4086e-25	4.70561e-19		1	-0.703036	2.65823e-54	0.49426
chr8:10473776-10473810	3	GTT	12	6	14,13,12,11,9,6	6	9	11	11.75	14	LINCR-0001	.	LINCR-0001	755	.		cg02319733	chr8:10425039	-48754	.	MSRA	MSRA	.		244	0.013711	0.1559	1.5756e-10	0.00030782		1	0.3251	8.66703e-07	0.10569
chr8:104688171-104688205	5	GTTTT	7	3	7,6,5	5	5	5	7	7	.	.	LRP12	99148	.		cg18603580	chr8:104665673	-22515	.	.	LRP12	.		243	-0.038534	0.1484	5.1083e-10	0.000997993		1	-0.310498	7.91048e-06	0.096409
chr8:104686807-104686848	2	GT	22	11	27,24,23,22,21,20,17,16,15,14,13	13	13	13	22	27	.	.	LRP12	97784	.		cg18603580	chr8:104665673	-21154.5	.	.	LRP12	.		241	-0.008496	0.15395	2.7118e-10	0.000529796		1	-0.328207	5.32507e-07	0.10772
chr8:104357078-104357094	2	AT	9	3	10,9,8	8	8	8	9	10	.	.	DCSTAMP	390	.		cg08657449	chr8:104339433	-17653	DCSTAMP	.	DCSTAMP	.		245	0.035515	0.22197	6.1074e-15	1.19318e-08		1	0.509863	5.64609e-26	0.25996
chr8:10417755-10417785	2	GT	16	26	41,40,39,38,37,36,35,34,33,32,31,30,28,27,26,25,24,23,22,21,20,19,18,17,16,15	15	18	20	33	41	.	MSRA	MSRA	0	MSRA_intron		cg02319733	chr8:10425039	7269	.	MSRA	MSRA	.		244	0.00278	0.2929	5.744e-20	1.12219e-13		1	0.501139	8.50946e-22	0.25114
chr8:10417755-10417785	2	GT	16	26	41,40,39,38,37,36,35,34,33,32,31,30,28,27,26,25,24,23,22,21,20,19,18,17,16,15	15	18	20	33	41	.	MSRA	MSRA	0	MSRA_intron		cg12940923	chr8:10425097	7327	.	MSRA	MSRA	.		244	0.005169	0.31389	1.4487e-21	2.83028e-15		1	0.567917	6.05481e-31	0.32253
chr8:10417420-10417446	2	AC	16	11	29,25,24,23,22,21,20,19,18,16,14	14	20	20	22	29	.	MSRA	MSRA	0	MSRA_intron		cg02319733	chr8:10425039	7606	.	MSRA	MSRA	.		244	0.011853	0.14933	4.1088e-10	0.000802724		1	0.401074	1.57403e-13	0.16086
chr8:10417420-10417446	2	AC	16	11	29,25,24,23,22,21,20,19,18,16,14	14	20	20	22	29	.	MSRA	MSRA	0	MSRA_intron		cg12940923	chr8:10425097	7664	.	MSRA	MSRA	.		244	0.023886	0.18876	1.1794e-12	2.30416e-06		1	0.470085	3.00333e-21	0.22098
chr8:103498695-103498734	2	AC	22	13	35,34,33,23,22,21,20,19,18,17,16,13,12	12	21	21	22	35	LOC105375690,RIMS2	LOC105375690	LOC105375690	0	LOC105375690_intron		cg04852977	chr8:103498603	-111.5	.	.	RIMS2	CpG:_242_Shore_N		244	0.011624	0.32247	3.118e-22	6.09154e-16		1	0.521402	4.88757e-28	0.27186
chr8:103464690-103464736	2	AC	24	17	30,29,28,27,26,25,24,23,22,21,20,19,18,17,16,14,10	10	21	22	23	30	.	.	LOC105375690	16544	.		cg06809756	chr8:103511994	47281	.	RIMS2	RIMS2	.		244	0.010301	0.17466	9.8423e-12	1.92286e-05		1	0.283709	0.000620631	0.080491
chr8:103406050-103406081	2	GT/AT	18	10	26,25,24,23,21,20,19,18,17,16	16	18	18	19	26	.	SLC25A32	SLC25A32	0	SLC25A32_intron		cg09164611	chr8:103393576	-12489.5	.	.	SLC25A32	.		243	-0.01686	0.22052	9.8825e-15	1.93071e-08		1	-0.402728	1.10213e-12	0.16219
chr8:10334166-10334215	2	GT	26	7	28,27,26,25,24,13,12	12	25	25	26	28	.	MSRA	MSRA	0	MSRA_intron		cg11548083	chr8:10350646	16455.5	.	MSRA	MSRA	.		245	0.008569	0.15385	1.9534e-10	0.00038163		1	0.324777	8.1716e-07	0.10548
chr8:10330207-10330229	2	AC	13	5	17,16,15,14,13	13	14	15	15	17	.	MSRA	MSRA	0	MSRA_intron		cg11548083	chr8:10350646	20428	.	MSRA	MSRA	.		245	0.03145	0.15349	2.0576e-10	0.000401987		1	0.369256	1.68525e-10	0.13635
chr8:103157126-103157159	2	AC	17	6	19,18,17,16,15,13	13	15	17	17	19	.	BAALC,BAALC-AS1	BAALC,BAALC-AS1	0	BAALC-AS1_intron,BAALC_intron		cg11318251	chr8:103140360	-16782.5	BAALC,BAALC-AS2	BAALC-AS2	BAALC-AS2	CpG:_84_Shore_N		244	0.069174	0.22539	4.0372e-15	7.88736e-09		1	0.420809	1.33123e-15	0.17708
chr8:103150334-103150399	2	GT	33	8	38,37,36,35,34,33,32,31	31	33	33	34	38	.	BAALC	BAALC	0	BAALC_intron		cg11318251	chr8:103140360	-10006.5	BAALC,BAALC-AS2	BAALC-AS2	BAALC-AS2	CpG:_84_Shore_N		244	0.056428	0.2465	1.3654e-16	2.66754e-10		1	0.343904	2.13519e-08	0.11827
chr8:102920722-102920802	2	GT/AG	41	13	44,43,42,41,40,39,38,37,36,35,34,33,32	32	37	40	40	44	.	AZIN1-AS1	AZIN1-AS1	0	AZIN1-AS1_intron		cg19883388	chr8:102897702	-23060	.	AZIN1-AS1	AZIN1-AS1	.		225	-0.012345	0.16599	2.0828e-10	0.00040691		0	0	0	0
chr8:102863614-102863647	3	CCG	11	3	12,11,10	10	10	11	11	12	AZIN1,AZIN1-AS1	AZIN1	AZIN1	0	AZIN1_intron		cg19883388	chr8:102897702	34071.5	.	AZIN1-AS1	AZIN1-AS1	.		225	-0.054511	0.16188	3.6487e-10	0.000712836		0	0	0	0
chr8:1023858-1023900	2	GT	23	19	37,36,35,34,33,32,31,30,29,28,27,26,25,24,23,22,21,20,19	19	23	27	30	37	.	DLGAP2	DLGAP2	0	DLGAP2_intron		cg04918696	chr8:1054106	30227	.	ERICH1-AS1	ERICH1-AS1	.		244	-0.014057	0.15221	2.7036e-10	0.000528194		1	-0.516043	1.92146e-26	0.2663
chr8:102107196-102107240	2	AT	24	16	32,28,27,26,25,24,23,22,21,20,19,18,17,14,12,8	8	18	21	24	32	.	NCALD	NCALD	0	NCALD_intron		cg23531459	chr8:102125757	18539	MIR5680,NCALD	.	MIR5680	CpG:_79_Shore_S		216	-0.018669	0.25549	2.0759e-15	4.05562e-09		1	-0.585431	1.23543e-25	0.34273
chr8:102099982-102100017	6	AAAAAG	6	3	8,7,6	6	6	8	8	8	.	NCALD	NCALD	0	NCALD_intron		cg23531459	chr8:102125757	25757.5	MIR5680,NCALD	.	MIR5680	CpG:_79_Shore_S		245	0.058918	0.18334	2.4117e-12	4.71167e-06		0	0	0	0
chr8:101377220-101377363	4	CCTT/CTTT	36	7	36,35,34,33,32,31,30	30	33	34	35	36	.	.	.CA4P	7626	.		cg23214426	chr8:101414945	37653.5	.	.	.CAP1	.		149	0.033124	0.23897	2.5257e-10	0.000493438		1	0.462677	3.79492e-13	0.21407
chr8:101230776-101230825	3	AAT/AGT	17	8	20,19,18,17,16,15,14,13	13	13	17	17	20	.	.	ZNF706	24713	.		cg23042086	chr8:101224603	-6197.5	.	.	ZNF706	CpG:_55_Island		244	0.020265	0.14908	4.2653e-10	0.000833299		1	0.420773	5.88431e-15	0.17705
chr8:101230776-101230825	3	AAT/AGT	17	8	20,19,18,17,16,15,14,13	13	13	17	17	20	.	.	ZNF706	24713	.		cg03250224	chr8:101224566	-6234.5	.	.	ZNF706	CpG:_55_Island		244	0.02621	0.15596	1.5624e-10	0.000305241		1	0.413171	3.49758e-14	0.17071
chr8:101230776-101230825	3	AAT/AGT	17	8	20,19,18,17,16,15,14,13	13	13	17	17	20	.	.	ZNF706	24713	.		cg24602417	chr8:101224055	-6745.5	.	.	ZNF706	CpG:_55_Island		245	0.018261	0.1797	4.1831e-12	8.1724e-06		1	0.364911	8.43155e-10	0.13316
chr8:101230776-101230825	3	AAT/AGT	17	8	20,19,18,17,16,15,14,13	13	13	17	17	20	.	.	ZNF706	24713	.		cg16058797	chr8:101224389	-6411.5	.	.	ZNF706	CpG:_55_Island		245	0.029779	0.19539	3.8475e-13	7.51675e-07		1	0.372988	1.23308e-10	0.13912
chr8:101230776-101230825	3	AAT/AGT	17	8	20,19,18,17,16,15,14,13	13	13	17	17	20	.	.	ZNF706	24713	.		cg13211302	chr8:101224503	-6297.5	.	.	ZNF706	CpG:_55_Island		245	0.020221	0.20801	5.4609e-14	1.06688e-07		1	0.441984	1.47443e-17	0.19535
chr8:101230776-101230825	3	AAT/AGT	17	8	20,19,18,17,16,15,14,13	13	13	17	17	20	.	.	ZNF706	24713	.		cg02168442	chr8:101224294	-6506.5	.	.	ZNF706	CpG:_55_Island		245	0.037591	0.24307	2.0678e-16	4.0398e-10		1	0.489939	2.1397e-23	0.24004
chr8:101220352-101220386	3	ATG	12	6	16,15,14,13,12,10	10	12	12	13	16	.	.	ZNF706	14289	.		cg13211302	chr8:101224503	4134	.	.	ZNF706	CpG:_55_Island		245	-0.041818	0.15272	2.3055e-10	0.000450419		1	-0.387531	2.15751e-12	0.15018
chr8:101220352-101220386	3	ATG	12	6	16,15,14,13,12,10	10	12	12	13	16	.	.	ZNF706	14289	.		cg02168442	chr8:101224294	3925	.	.	ZNF706	CpG:_55_Island		245	-0.075126	0.16665	2.9495e-11	5.76235e-05		1	-0.402815	6.73659e-14	0.16226
chr8:101194508-101194525	2	AG	12	3	13,12,11	11	11	12	12	13	.	.	ZNF706	2513	.		cg23042086	chr8:101224603	30086.5	.	.	ZNF706	CpG:_55_Island		244	0.108542	0.25494	3.4404e-17	6.72141e-11		1	0.427001	4.7668e-16	0.18233
chr8:101194508-101194525	2	AG	12	3	13,12,11	11	11	12	12	13	.	.	ZNF706	2513	.		cg03250224	chr8:101224566	30049.5	.	.	ZNF706	CpG:_55_Island		244	0.139048	0.26164	1.1379e-17	2.22308e-11		1	0.426743	5.09193e-16	0.18211
chr8:101194508-101194525	2	AG	12	3	13,12,11	11	11	12	12	13	.	.	ZNF706	2513	.		cg24602417	chr8:101224055	29538.5	.	.	ZNF706	CpG:_55_Island		245	0.093739	0.28186	3.226e-19	6.30254e-13		1	0.396043	5.37283e-13	0.15685
chr8:101194508-101194525	2	AG	12	3	13,12,11	11	11	12	12	13	.	.	ZNF706	2513	.		cg16058797	chr8:101224389	29872.5	.	.	ZNF706	CpG:_55_Island		245	0.151009	0.29907	1.6451e-20	3.21398e-14		1	0.380776	1.1044e-11	0.14499
chr8:101194508-101194525	2	AG	12	3	13,12,11	11	11	12	12	13	.	.	ZNF706	2513	.		cg13211302	chr8:101224503	29986.5	.	.	ZNF706	CpG:_55_Island		245	0.106022	0.34039	9.6112e-24	1.87771e-17		1	0.48484	2.56603e-23	0.23507
chr8:101194508-101194525	2	AG	12	3	13,12,11	11	11	12	12	13	.	.	ZNF706	2513	.		cg02168442	chr8:101224294	29777.5	.	.	ZNF706	CpG:_55_Island		245	0.194985	0.38928	7.7712e-28	1.51824e-21		1	0.526868	2.81874e-29	0.27759
chr8:101070381-101070440	2	GT/AG	30	6	39,38,37,36,31,30	30	30	30	30	39	.	FLJ42969	FLJ42969	0	FLJ42969_intron		cg00576340	chr8:101073868	3457.5	.	FLJ42969	FLJ42969	.		244	-0.031482	0.42735	3.9448e-31	7.70684e-25		1	-0.799481	4.98603e-100	0.63917
chr8:101063453-101063490	2	GT	20	10	27,26,25,24,23,22,21,20,19,18	18	20	21	21	27	.	FLJ42969	FLJ42969	0	FLJ42969_intron		cg00576340	chr8:101073868	10396.5	.	FLJ42969	FLJ42969	.		245	0.045844	0.20852	5.05e-14	9.86603e-08		1	0.640375	4.07347e-50	0.41008
chr8:100984001-100984025	2	CT	13	7	18,17,16,15,14,13,12	12	13	13	17	18	.	.	YWHAZ	30620	.		cg04962480	chr8:100949890	-34123	YWHAZ	YWHAZ	YWHAZ	CpG:_238_Shore_N		245	0.022431	0.18184	3.0264e-12	5.91259e-06		1	0.418712	2.01383e-15	0.17532
chr8:100979657-100979679	5	AAAAC	6	3	8,7,6	6	6	6	7	8	.	.	YWHAZ	26276	.		cg04962480	chr8:100949890	-29778	YWHAZ	YWHAZ	YWHAZ	CpG:_238_Shore_N		245	0.070699	0.15353	2.0479e-10	0.000400092		1	0.43535	2.02675e-17	0.18953
chr8:100878648-100878675	4	ATTT	7	6	10,8,7,6,5,4	4	6.25	7	7	10	.	.	YWHAZ	37848	.		cg01784408	chr8:100901839	23177.5	.	.	YWHAZ	.		243	-0.025337	0.27699	1.0264e-18	2.00525e-12		1	-0.595777	3.71878e-41	0.35495
chr8:100878648-100878675	4	ATTT	7	6	10,8,7,6,5,4	4	6.25	7	7	10	.	.	YWHAZ	37848	.		cg07217150	chr8:100907145	28483.5	.	.	YWHAZ	.		245	0.241763	0.35444	6.8847e-25	1.34504e-18		1	0.700585	4.52603e-66	0.49082
chr8:100424647-100424689	2	GT	22	11	30,29,28,27,26,25,24,23,22,21,20	20	22	22.5	27	30	.	.	MIR4471	41803	.		cg12680929	chr8:100416802	-7866	.	.	MIR4471	.		245	-0.010452	0.17049	1.6648e-11	3.25247e-05		0	0	0	0
chr8:100372230-100372254	2	GT	13	6	21,20,19,15,14,13	13	13	14	14	21	.	.	MIR4471	10509	.		cg12182643	chr8:100336693	-35549	RNF19A	.	RNF19A	.		244	0.049868	0.20988	4.6059e-14	8.99841e-08		1	0.417265	2.60498e-15	0.17411
chr8:100214989-100215050	2	AT	33	21	33,32,31,30,29,28,27,26,25,24,23,22,21,19,18,17,16,15,14,12,10	10	15	25	28	33	.	SPAG1	SPAG1	0	SPAG1_intron		cg00191853	chr8:100165505	-49514.5	.	SPAG1	SPAG1	.		191	0.019521	0.29171	7.4198e-16	1.44958e-09		1	0.444612	1.93037e-07	0.19768
chr8:100172635-100172689	2	GT	28	13	35,34,33,32,31,30,29,28,27,26,25,24,23	23	26	28	28	35	.	SPAG1	SPAG1	0	SPAG1_intron		cg06636551	chr8:100212687	40025	.	SPAG1	SPAG1	CpG:_72_Shore_N		244	-0.040834	0.24413	2.0068e-16	3.92062e-10		1	-0.37466	5.9632e-11	0.14037
chr8:100172635-100172689	2	GT	28	13	35,34,33,32,31,30,29,28,27,26,25,24,23	23	26	28	28	35	.	SPAG1	SPAG1	0	SPAG1_intron		cg00191853	chr8:100165505	-7157	.	SPAG1	SPAG1	.		244	-0.060582	0.47582	8.4283e-36	1.64661e-29		1	-0.617738	6.35665e-45	0.3816
chr8:100115507-100115523	2	AT	9	3	10,9,8	8	8	8	9	10	.	.	RGS22	9459	.		cg08590069	chr8:100106671	-8844	RGS22	.	RGS22	CpG:_88_Shore_S		243	-0.053883	0.15232	2.8967e-10	0.00056592		1	-0.289462	0.000208547	0.083788
chr8:100115507-100115523	2	AT	9	3	10,9,8	8	8	8	9	10	.	.	RGS22	9459	.		cg17168157	chr8:100106615	-8900	RGS22	.	RGS22	CpG:_88_Shore_S		244	-0.081424	0.17753	6.4095e-12	1.2522e-05		1	-0.316402	2.63317e-06	0.10011
chr8:100115507-100115523	2	AT	9	3	10,9,8	8	8	8	9	10	.	.	RGS22	9459	.		cg00191853	chr8:100165505	49990	.	SPAG1	SPAG1	.		243	-0.236851	0.26805	4.5908e-18	8.96891e-12		1	-0.657571	2.3697e-54	0.4324
chr7:99913671-99913697	4	AAAT	7	3	9,8,7	7	7	7	8	9	.	TRIM4	TRIM4	0	TRIM4_intron		cg14714629	chr7:99897829	-15855	.	TRIM4	TRIM4	.		245	0.036098	0.18457	2.003e-12	3.9132e-06		0	0	0	0
chr7:99909134-99909170	2	GT	19	8	25,24,23,22,21,20,19,17	17	19	20	23	25	.	TRIM4	TRIM4	0	TRIM4_intron		cg14714629	chr7:99897829	-11323	.	TRIM4	TRIM4	.		244	0.008437	0.15039	3.523e-10	0.000688278		0	0	0	0
chr7:99565970-99565984	2	AC	8	4	10,9,8,7	7	8	8	9	10	.	ZNF655	ZNF655	0	ZNF655_intron		cg04083712	chr7:99559345	-6632	ZNF655	ZNF655	ZNF655	CpG:_90_Island		242	0.026607	0.15031	4.2096e-10	0.000822417		1	0.429826	1.27246e-16	0.18475
chr7:99144016-99144048	3	CCG	13	4	17,13,12,9	9	9	13	13	17	SMURF1	SMURF1	SMURF1	0	SMURF1_5utr		cg05967295	chr7:99144013	-19	SMURF1	SMURF1	SMURF1	CpG:_69_Island		239	-0.014601	0.24553	3.2664e-16	6.38147e-10		1	-0.546681	1.08968e-31	0.29886
chr7:99133103-99133116	2	AC	8	3	10,9,8	8	8	8	8.25	10	.	SMURF1	SMURF1	0	SMURF1_intron		cg05967295	chr7:99144013	10903.5	SMURF1	SMURF1	SMURF1	CpG:_69_Island		238	0.040996	0.21704	3.1763e-14	6.20544e-08		1	0.481425	1.60185e-22	0.23177
chr7:99059398-99059468	5	AAAAT	15	11	20,18,17,16,15,14,13,12,11,10,9	9	13	13	15	20	.	SMURF1	SMURF1	0	SMURF1_intron		cg27297376	chr7:99030217	-29216	.	LOC101927550,SMURF1	SMURF1	.		244	-0.030495	0.18315	2.751e-12	5.37455e-06		1	-0.490296	1.62052e-21	0.24039
chr7:98874882-98874906	3	GTT	8	3	9,8,7	7	8	8	8	9	.	.	TRRAP	3584	.		cg26977749	chr7:98880210	5316	MIR3609,SCAR.28,TRRAP	TRRAP	TRRAP	CpG:_125_Shore_S		242	-0.104491	0.15672	1.6639e-10	0.000325071		1	-0.351027	3.93762e-09	0.12322
chr7:98847505-98847550	2	GT	23	10	24,23,22,21,20,19,18,17,16,15	15	18	18	18	24	.	TMEM130	TMEM130	0	TMEM130_3utr		cg00833441	chr7:98846787	-740.5	.	TMEM130	TMEM130	.		244	0.023863	0.1624	6.0672e-11	0.000118533		0	0	0	0
chr7:98665393-98665478	4	CTTT	22	11	26,25,24,23,22,21,20,19,18,17,16	16	20	22	23	26	.	.	NPTX2	35525	.		cg18280289	chr7:98668609	3173.5	.	.	NPTX2	.		243	0.018847	0.17895	5.7292e-12	1.1193e-05		1	0.333017	2.27457e-07	0.1109
chr7:98353962-98354008	5	AAAAT	10	5	11,10,9,8,7	7	7	8	8	11	.	BAIAP2L1	BAIAP2L1	0	BAIAP2L1_intron		cg03626541	chr7:98352803	-1182	.	BAIAP2L1	BAIAP2L1	.		245	-0.100393	0.44092	1.5949e-32	3.11591e-26		1	-0.77282	9.23019e-90	0.59725
chr7:98346995-98347033	3	AAC	13	5	14,13,12,11,10	10	12	13	13	14	.	BAIAP2L1	BAIAP2L1	0	BAIAP2L1_intron		cg03626541	chr7:98352803	5789	.	BAIAP2L1	BAIAP2L1	.		245	-0.196052	0.65892	1.0988e-58	2.14669e-52		1	-0.866453	5.17258e-140	0.75074
chr7:98343249-98343302	2	AC	27	13	32,31,30,29,28,27,26,25,24,23,22,18,16	16	25	26	28	32	.	BAIAP2L1	BAIAP2L1	0	BAIAP2L1_intron		cg03626541	chr7:98352803	9527.5	.	BAIAP2L1	BAIAP2L1	.		244	-0.037974	0.37877	7.9557e-27	1.55428e-20		1	-0.715108	2.77548e-69	0.51138
chr7:98310687-98310703	4	ATTT	4	4	7,6,5,4	4	4	4	6	7	.	BAIAP2L1	BAIAP2L1	0	BAIAP2L1_intron		cg06524039	chr7:98282837	-27858	BRI3	BRI3	BRI3	CpG:_103_Shore_S		217	0.042556	0.25556	1.7673e-15	3.45272e-09		1	0.455038	1.56616e-17	0.20706
chr7:98310687-98310703	4	ATTT	4	4	7,6,5,4	4	4	4	6	7	.	BAIAP2L1	BAIAP2L1	0	BAIAP2L1_intron		cg03626541	chr7:98352803	42108	.	BAIAP2L1	BAIAP2L1	.		223	0.109491	0.71681	1.7978e-62	3.51231e-56		1	0.891544	8.35912e-147	0.79485
chr7:98272627-98272705	5	ATTTT	16	3	16,15,14	14	15	16	16	16	.	.	BRI3	8981	.		cg03493211	chr7:98294487	21821	.	BAIAP2L1	BAIAP2L1	.		245	0.038643	0.15481	1.6955e-10	0.000331245		1	0.32775	4.58828e-07	0.10742
chr7:98259613-98259638	2	GT	16	5	18,17,16,15,14	14	16	16	17	18	.	.	TECPR1	7382	.		cg23363826	chr7:98217913	-41712.5	.	TECPR1	TECPR1	.		245	-0.067841	0.25491	2.9771e-17	5.81627e-11		1	-0.466058	5.12678e-21	0.21721
chr7:98129356-98129397	5	GTTTT	8	7	11,10,9,8,7,6,5	5	7	7	9	11	.	LMTK2	LMTK2	0	LMTK2_intron		cg14507403	chr7:98168693	39316.5	.	LMTK2	LMTK2	CpG:_20_Shelf_N		244	0.13423	0.43873	3.4344e-32	6.70968e-26		1	0.544187	9.37955e-32	0.29614
chr7:98123705-98123737	2	AC	18	5	20,19,18,17,16	16	18	19	19	20	.	LMTK2	LMTK2	0	LMTK2_intron		cg14507403	chr7:98168693	44972	.	LMTK2	LMTK2	CpG:_20_Shelf_N		244	-0.201196	0.20254	1.4344e-13	2.80234e-07		1	-0.507691	1.60842e-26	0.25775
chr7:98017251-98017314	3	GTT/ATT	21	9	23,22,21,20,19,18,17,16,14	14	19	19	20	23	.	.	OCM2	27148	.		cg08950088	chr7:98027651	10368.5	.	.	OCM2	.		241	0.017673	0.35227	2.4979e-24	4.88007e-18		1	0.504648	1.91794e-25	0.25467
chr7:9765256-9765349	2	AT	49	4	56,49,48,46	46	48	49	49	56	.	.	PER4	129439	.		cg08379654	chr7:9758796	-6506.5	.	.	PER4	.		226	0.059457	0.19049	6.3003e-12	1.23087e-05		1	0.580853	2.93168e-31	0.33739
chr7:9764960-9765081	2	AT	63	3	63,62,61	61	61	63	63	63	.	.	PER4	129143	.		cg08379654	chr7:9758796	-6224.5	.	.	PER4	.		176	0.072228	0.40146	3.8282e-21	7.47904e-15		1	0.615719	1.66033e-31	0.37911
chr7:9715394-9715442	2	AC	25	9	29,28,27,26,25,24,23,22,21	21	23	24	24	29	.	.	PER4	79577	.		cg08379654	chr7:9758796	43378	.	.	PER4	.		227	0.056342	0.19541	2.8134e-12	5.49646e-06		1	0.437778	2.82813e-17	0.19165
chr7:97020182-97020217	2	AT/AC	18	4	20,19,18,17	17	18	18	19	20	.	.	DLX5	181	.		cg08832603	chr7:97023169	2969.5	DLX5	DLX5	DLX5	CpG:_109_Shore_S,CpG:_20_Shore_S,CpG:_57_Shore_N		243	-0.04171	0.16538	4.2881e-11	8.37753e-05		0	0	0	0
chr7:96999848-96999879	2	GT/CG	17	13	26,25,24,23,22,20,19,17,16,15,13,12,10	10	16	25	25	26	.	DLX6-AS1	DLX6-AS1	0	DLX6-AS1_intron		cg11113469	chr7:96999651	-212.5	.	DLX6-AS1	DLX6-AS1	CpG:_30_Shelf_N		245	-0.011925	0.29895	1.6798e-20	3.28177e-14		1	-0.362464	1.1005e-09	0.13138
chr7:96756450-96756527	2	GT/AT	40	27	54,53,52,51,48,46,45,44,43,42,41,40,39,38,37,36,35,33,32,31,29,28,27,26,25,24,21	21	39	44	51	54	.	.	SEM1	46560	.		cg11240687	chr7:96723931	-32557.5	.	.	SHFM1	.		241	-0.005252	0.16718	3.9627e-11	7.74181e-05		0	0	0	0
chr7:96703973-96704011	2	AC	22	15	31,29,28,27,26,25,24,23,22,21,20,19,18,16,12	12	21	22	24	31	.	SEM1	SEM1	0	SEM1_intron		cg11240687	chr7:96723931	19939	.	.	SHFM1	.		242	-0.020736	0.23227	1.7693e-15	3.45663e-09		1	-0.296473	0.000141279	0.087896
chr7:95772112-95772171	2	AC	30	9	32,31,30,29,27,26,25,24,23	23	24	24	29	32	DYNC1I1	.	DYNC1I1	335	.		cg10281478	chr7:95773216	1074.5	DYNC1I1	DYNC1I1	DYNC1I1	CpG:_78_Shore_S		233	-0.017742	0.51958	1.2219e-38	2.38719e-32		1	-0.406473	1.94446e-13	0.16522
chr7:95772112-95772171	2	AC	30	9	32,31,30,29,27,26,25,24,23	23	24	24	29	32	DYNC1I1	.	DYNC1I1	335	.		cg17889682	chr7:95773421	1279.5	DYNC1I1	DYNC1I1	DYNC1I1	CpG:_78_Shore_S		245	-0.055476	0.5132	7.3291e-40	1.43186e-33		1	-0.823839	1.18874e-112	0.67871
chr7:95772112-95772171	2	AC	30	9	32,31,30,29,27,26,25,24,23	23	24	24	29	32	DYNC1I1	.	DYNC1I1	335	.		cg18032014	chr7:95773119	977.5	DYNC1I1	DYNC1I1	DYNC1I1	CpG:_78_Island		242	-0.029546	0.5777	8.0015e-47	1.56323e-40		1	-0.681513	1.42039e-59	0.46446
chr7:95756862-95756903	2	CT	21	3	21,19,18	18	18	18	21	21	.	.	DYNC1I1	15603	.		cg10281478	chr7:95773216	16333.5	DYNC1I1	DYNC1I1	DYNC1I1	CpG:_78_Shore_S		233	-0.020308	0.16678	8.8662e-11	0.000173216		0	0	0	0
chr7:95756862-95756903	2	CT	21	3	21,19,18	18	18	18	21	21	.	.	DYNC1I1	15603	.		cg18032014	chr7:95773119	16236.5	DYNC1I1	DYNC1I1	DYNC1I1	CpG:_78_Island		242	-0.037632	0.23177	1.915e-15	3.74128e-09		1	-0.454302	1.49751e-17	0.20639
chr7:95756862-95756903	2	CT	21	3	21,19,18	18	18	18	21	21	.	.	DYNC1I1	15603	.		cg17889682	chr7:95773421	16538.5	DYNC1I1	DYNC1I1	DYNC1I1	CpG:_78_Shore_S		245	-0.074934	0.23381	9.2314e-16	1.80351e-09		1	-0.601357	1.0269e-38	0.36163
chr7:95493362-95493407	2	GT	23	10	25,24,23,22,21,20,19,18,17,16	16	19	20	23	25	.	ASB4	ASB4	0	ASB4_intron		cg11377695	chr7:95509414	16029.5	.	ASB4	ASB4	.		245	0.018296	0.18927	9.8041e-13	1.9154e-06		1	0.346367	1.85641e-08	0.11997
chr7:95417683-95417726	2	AC	24	14	35,34,33,32,31,30,29,27,26,25,24,23,22,19	19	24	24	26	35	.	PON2	PON2	0	PON2_intron		cg21685655	chr7:95404939	-12765.5	.	PON2	PON2	.		221	-0.027644	0.69222	5.9225e-58	1.15706e-51		1	-0.793877	3.40832e-93	0.63024
chr7:95399099-95399144	2	GT/AT	24	9	27,25,24,23,22,21,20,19,16	16	20	22	24	27	.	.	PON3	2725	.		cg21685655	chr7:95404939	5817.5	.	PON2	PON2	.		227	0.021467	0.18136	2.0461e-11	3.9974e-05		1	0.516246	1.7301e-27	0.26651
chr7:95399099-95399144	2	GT/AT	24	9	27,25,24,23,22,21,20,19,16	16	20	22	24	27	.	.	PON3	2725	.		cg08034980	chr7:95398439	-682.5	.	.	PON3	CpG:_58_Shore_S		237	-0.010408	0.233	3.091e-15	6.03879e-09		1	-0.449933	9.24468e-19	0.20244
chr7:95398519-95398563	2	GT	26	12	33,32,31,30,29,28,27,26,25,24,23,18	18	24	26	28	33	.	.	PON3	2145	.		cg08034980	chr7:95398439	-102	.	.	PON3	CpG:_58_Shore_S		239	0.008636	0.21687	2.8773e-14	5.62129e-08		1	0.409524	2.01285e-14	0.16771
chr7:95398519-95398563	2	GT	26	12	33,32,31,30,29,28,27,26,25,24,23,18	18	24	26	28	33	.	.	PON3	2145	.		cg21685655	chr7:95404939	6398	.	PON2	PON2	.		228	-0.026326	0.31971	1.1541e-20	2.25473e-14		1	-0.607445	3.00626e-43	0.36899
chr7:94553787-94553818	4	AAAT	8	5	12,11,10,9,8	8	8	9	10	12	.	CASD1	CASD1	0	CASD1_intron		cg00347863	chr7:94591385	37582.5	.	SGCE	SGCE	.		240	0.049866	0.25386	7.4325e-17	1.45207e-10		1	0.489786	5.6226e-24	0.23989
chr7:94393452-94393512	2	AC/CG/AC	31	12	40,39,38,37,36,35,34,33,32,31,30,29	29	31	31.5	34	40	COL1A2,COL1A2-AS1	.	COL1A2	1049	.		cg24406898	chr7:94393996	514	COL1A2	.	COL1A2	.		244	0.017666	0.20772	6.4387e-14	1.25791e-07		1	0.444882	4.97566e-18	0.19792
chr7:94393452-94393512	2	AC/CG/AC	31	12	40,39,38,37,36,35,34,33,32,31,30,29	29	31	31.5	34	40	COL1A2,COL1A2-AS1	.	COL1A2	1049	.		cg10258721	chr7:94394130	648	COL1A2	.	COL1A2	.		244	0.027939	0.28198	3.7365e-19	7.29989e-13		1	0.557629	1.25123e-33	0.31095
chr7:94393452-94393512	2	AC/CG/AC	31	12	40,39,38,37,36,35,34,33,32,31,30,29	29	31	31.5	34	40	COL1A2,COL1A2-AS1	.	COL1A2	1049	.		cg06299997	chr7:94394245	763	COL1A2	.	COL1A2	.		242	0.021996	0.35472	1.2679e-24	2.47706e-18		1	0.580534	1.39344e-37	0.33702
chr7:94393452-94393512	2	AC/CG/AC	31	12	40,39,38,37,36,35,34,33,32,31,30,29	29	31	31.5	34	40	COL1A2,COL1A2-AS1	.	COL1A2	1049	.		cg23348014	chr7:94394171	689	COL1A2	.	COL1A2	.		244	0.013055	0.35777	4.577e-25	8.94195e-19		1	0.698341	5.67584e-64	0.48768
chr7:93176948-93176998	2	GT	26	13	34,33,32,31,30,29,28,27,26,25,24,23,13	13	26	30	31	34	.	.	HEPACAM2	11536	.		cg04992673	chr7:93219401	42428	HEPACAM2	HEPACAM2	HEPACAM2	.		244	0.004653	0.15552	1.6665e-10	0.000325579		1	0.334544	3.16873e-07	0.11192
chr7:93172863-93172895	4	AAAT	8	7	13,12,11,10,9,8,7	7	8	11	11	13	.	.	HEPACAM2	15639	.		cg04992673	chr7:93219401	46522	HEPACAM2	HEPACAM2	HEPACAM2	.		244	0.00959	0.17539	8.8214e-12	1.72341e-05		1	0.376457	2.7743e-11	0.14172
chr7:92658571-92658607	2	CT	19	5	20,19,18,17,15	15	18	19	19	20	.	CDK6	CDK6	0	CDK6_intron		cg11662791	chr7:92635472	-23117	.	CDK6	CDK6	.		244	0.168906	0.39932	1.3237e-28	2.58607e-22		1	0.659507	1.90228e-54	0.43495
chr7:92157538-92157588	4	CCTT/CTTT	13	3	15,14,13	13	13	13	14	15	.	CYP51A1-AS1,LRRD1	CYP51A1-AS1,LRRD1	0	CYP51A1-AS1_intron,LRRD1_intron		cg22117172	chr7:92135216	-22347	CYP51A1,CYP51A1-AS1	CYP51A1-AS1	CYP51A1-AS1	CpG:_115_Shore_S		245	0.043784	0.15649	1.3254e-10	0.000258939		1	0.286252	0.000298865	0.08194
chr7:92152141-92152170	2	GT	15	12	24,23,22,21,20,19,18,17,16,15,13,9	9	15	16	21	24	.	CYP51A1-AS1,LRRD1	CYP51A1-AS1,LRRD1	0	CYP51A1-AS1_intron,LRRD1_intron		cg22117172	chr7:92135216	-16939.5	CYP51A1,CYP51A1-AS1	CYP51A1-AS1	CYP51A1-AS1	CpG:_115_Shore_S		244	0.007586	0.15732	1.2802e-10	0.000250109		1	0.299013	5.12717e-05	0.089409
chr7:91548644-91548671	2	GT/AT	15	5	19,18,17,16,15	15	15	15	18	19	.	.	FZD1	277319	.		cg10265351	chr7:91557138	8480.5	.	.	FZD1	.		245	0.043884	0.16262	5.3623e-11	0.000104762		1	0.351013	7.6887e-09	0.12321
chr7:91290944-91290978	2	AT	21	12	31,30,29,28,27,26,25,24,23,22,21,20	20	21	22	25	31	.	.	FZD1	19619	.		cg11407226	chr7:91287783	-3178	.	.	FZD1	.		244	-0.019502	0.17414	1.0628e-11	2.07636e-05		1	-0.445466	3.8145e-18	0.19844
chr7:90371006-90371049	4	AAAT	11	8	15,14,13,12,11,10,9,8	8	10	10	10	15	.	GTPBP10	GTPBP10	0	GTPBP10_intron		cg11247073	chr7:90335411	-35616.5	LOC101927446	LOC101927446	LOC101927446	.		245	-0.024433	0.20099	1.6241e-13	3.17296e-07		1	-0.497252	5.43605e-25	0.24726
chr7:90370336-90370359	2	GT	15	6	19,18,17,16,15,14	14	15	15	17	19	.	GTPBP10	GTPBP10	0	GTPBP10_intron		cg09277219	chr7:90403153	32805.5	CLDN12	.	CLDN12	.		243	-0.033643	0.17622	8.6049e-12	1.68111e-05		0	0	0	0
chr7:88075452-88075499	2	GT/AG	24	3	27,26,24	24	24	26	26	27	.	ADAM22	ADAM22	0	ADAM22_intron		cg17846504	chr7:88072946	-2529.5	.	ADAM22	ADAM22	.		240	0.024849	0.1793	7.3577e-12	1.43745e-05		1	0.521133	2.82578e-28	0.27158
chr7:87473727-87473746	2	GT	10	5	13,12,11,10,9	9	10	10	10	13	ABCB4	ABCB4	ABCB4	0	ABCB4_intron		cg17212350	chr7:87446061	-27675.5	.	ABCB4	ABCB4	.		229	-0.132453	0.44504	7.4241e-31	1.45042e-24		1	-0.671409	3.6393e-58	0.45079
chr7:87468933-87468981	5	AAAAT	10	10	20,19,18,17,16,14,11,10,9,8	8	10	10	11	20	.	ABCB4	ABCB4	0	ABCB4_intron		cg25823085	chr7:87476100	7143	ABCB4	.	ABCB4	CpG:_63_Shore_S		238	0.011867	0.17873	9.7724e-12	1.9092e-05		1	0.392352	4.35789e-12	0.15394
chr7:87468933-87468981	5	AAAAT	10	10	20,19,18,17,16,14,11,10,9,8	8	10	10	11	20	.	ABCB4	ABCB4	0	ABCB4_intron		cg17212350	chr7:87446061	-22896	.	ABCB4	ABCB4	.		229	-0.030385	0.538	6.2163e-40	1.21446e-33		1	-0.74617	7.76973e-77	0.55677
chr7:87463247-87463280	2	AC	17	5	19,18,17,15,14	14	15.5	17	17	19	.	ABCB4	ABCB4	0	ABCB4_intron		cg04996195	chr7:87476082	12818.5	ABCB4	.	ABCB4	CpG:_63_Shore_S		245	-0.036377	0.17342	1.074e-11	2.09824e-05		1	-0.416761	3.92822e-15	0.17369
chr7:87463247-87463280	2	AC	17	5	19,18,17,15,14	14	15.5	17	17	19	.	ABCB4	ABCB4	0	ABCB4_intron		cg25823085	chr7:87476100	12836.5	ABCB4	.	ABCB4	CpG:_63_Shore_S		238	-0.032688	0.22127	1.6592e-14	3.24153e-08		1	-0.377094	3.30947e-11	0.1422
chr7:87463247-87463280	2	AC	17	5	19,18,17,15,14	14	15.5	17	17	19	.	ABCB4	ABCB4	0	ABCB4_intron		cg17212350	chr7:87446061	-17202.5	.	ABCB4	ABCB4	.		229	0.080153	0.59769	8.9502e-47	1.74857e-40		1	0.737306	1.76475e-76	0.54362
chr7:85168799-85168893	4	AAAG	24	13	27,26,25,24,23,22,21,20,19,18,17,16,15	15	18	22	24	27	.	.	SEMA3D	46869	.		cg11878016	chr7:85187527	18681	.	.	SEMA3D	CpG:_94_Shore_S		169	-0.012641	0.22549	6.9012e-11	0.000134827		1	-0.592453	1.41659e-22	0.351
chr7:85151588-85151631	2	GT	22	7	24,23,22,21,20,19,18	18	20	21	22	24	.	.	SEMA3D	29658	.		cg11878016	chr7:85187527	35917.5	.	.	SEMA3D	CpG:_94_Shore_S		170	-0.038111	0.22012	1.0941e-10	0.000213751		1	-0.39455	5.98904e-06	0.15567
chr7:85151093-85151117	2	AC	13	3	14,13,12	12	12	12	13	14	.	.	SEMA3D	29163	.		cg11878016	chr7:85187527	36422	.	.	SEMA3D	CpG:_94_Shore_S		170	-0.102209	0.33773	9.6956e-17	1.8942e-10		1	-0.593237	5.97925e-23	0.35193
chr7:85150476-85150504	2	AT/AC	15	3	16,15,14	14	15	15	16	16	.	.	SEMA3D	28546	.		cg11878016	chr7:85187527	37037	.	.	SEMA3D	CpG:_94_Shore_S		169	0.076572	0.20778	4.7344e-10	0.000924946		1	0.597361	1.45282e-22	0.35684
chr7:85150347-85150380	2	AT	20	7	24,23,22,21,20,19,18	18	20	21	22	24	.	.	SEMA3D	28417	.		cg11878016	chr7:85187527	37163.5	.	.	SEMA3D	CpG:_94_Shore_S		168	0.038354	0.23349	3.2644e-11	6.37756e-05		1	0.579974	8.19959e-21	0.33637
chr7:84937678-84937707	2	GT	15	5	16,15,14,13,12	12	12	15	15	16	.	.	SEMA3D	57849	.		cg16204133	chr7:84981420	43727.5	.	.	SEMA3D	.		239	-0.019122	0.25547	6.658e-17	1.30075e-10		1	-0.488457	4.40741e-23	0.23859
chr7:84598819-84598882	2	AC	32	12	34,33,32,31,30,29,28,27,26,25,24,23	23	24	28	30	34	.	.	LOC101927378	14502	.		cg23471905	chr7:84614543	15692.5	.	.	LOC101927378	.		245	-0.006092	0.15858	9.747e-11	0.000190424		1	-0.455159	8.14008e-19	0.20717
chr7:83860676-83860692	2	AC	9	3	10,9,8	8	9	9	9	10	.	.	SEMA3A	95085	.		cg06466325	chr7:83852322	-8362	.	.	SEMA3A	.		245	-0.045884	0.18343	2.3798e-12	4.64934e-06		1	-0.70315	5.82206e-67	0.49442
chr7:82370543-82370580	4	ATGG	10	7	15,14,13,12,10,9,6	6	10	13	14	15	.	CACNA2D1	CACNA2D1	0	CACNA2D1_intron		cg00704369	chr7:82367243	-3318.5	.	CACNA2D1	CACNA2D1	.		241	0.01987	0.40044	2.2863e-28	4.46668e-22		1	0.689884	6.17127e-62	0.47594
chr7:8145749-8145783	2	AT	19	19	39,38,37,36,35,34,33,32,31,30,28,26,25,24,23,22,21,20,19	19	22	22	22	39	.	ICA1	ICA1	0	ICA1_intron		cg16082402	chr7:8143784	-1982	.	ICA1	ICA1	.		243	-0.005178	0.16769	3.0467e-11	5.95225e-05		1	-0.37975	5.62925e-10	0.14421
chr7:80753925-80753955	4	GTTT	8	4	10,9,8,7	7	8	8	9	10	.	SEMA3C	SEMA3C	0	SEMA3C_intron		cg06887137	chr7:80731392	-22548	.	.	SEMA3C	.		244	-0.079519	0.15879	1.0322e-10	0.000201658		1	-0.281306	0.000748727	0.079133
chr7:80746719-80746747	2	GT	16	13	29,28,27,26,25,24,23,22,21,20,19,18,16	16	21	21	24	29	.	SEMA3C	SEMA3C	0	SEMA3C_intron		cg06887137	chr7:80731392	-15341	.	.	SEMA3C	.		245	-0.016752	0.16325	4.8883e-11	9.55013e-05		1	-0.348741	1.10956e-08	0.12162
chr7:80678082-80678113	2	GT	16	10	18,17,16,15,14,13,12,11,10,7	7	11	14	15	18	.	CD36	CD36	0	CD36_3utr		cg21369886	chr7:80675935	-2162.5	.	CD36	CD36	.		245	0.017346	0.35005	1.5774e-24	3.08172e-18		1	0.529594	1.08161e-29	0.28047
chr7:80143905-80143922	2	GT	12	4	15,14,13,12	12	14	14	14	15	.	GNAI1	GNAI1	0	GNAI1_intron		cg08546933	chr7:80133924	-9989.5	GNAI1	.	GNAI1	CpG:_103_Shore_N		238	-0.15223	0.47449	8.0013e-35	1.56319e-28		1	-0.690297	1.1919e-59	0.47651
chr7:80119977-80120025	2	AC	25	12	27,26,25,24,23,22,21,20,19,18,17,16	16	17	20	23	27	.	.	GNAI1	14806	.		cg11557463	chr7:80125251	5250	.	.	GNAI1	.		244	0.020135	0.20799	6.1676e-14	1.20495e-07		1	0.503587	4.58985e-26	0.2536
chr7:78061410-78061457	2	AC	24	13	27,26,25,24,23,22,21,20,19,18,17,16,15	15	18	22	23	27	.	MAGI2	MAGI2	0	MAGI2_intron		cg24831125	chr7:78058394	-3039.5	.	MAGI2	MAGI2	.		245	0.01015	0.14898	3.9824e-10	0.00077803		1	0.340088	4.93788e-08	0.11566
chr7:775512-775539	2	GT	14	9	18,17,16,15,14,13,12,11,9	9	12	12	14	18	.	DNAAF5	DNAAF5	0	DNAAF5_intron		cg03113739	chr7:732375	-43150.5	.	DNAAF5	DNAAF5	.		245	0.027246	0.15163	2.7047e-10	0.000528409		1	0.305706	2.23816e-05	0.093456
chr7:77504562-77504588	3	ATT	9	7	15,13,12,11,10,9,7	7	9	9	9	15	.	.	PTPN12	32707	.		cg14359621	chr7:77513460	8885	.	.	PTPN12	.		242	-0.034156	0.21411	3.0424e-14	5.94385e-08		1	-0.491253	2.35463e-24	0.24133
chr7:77504562-77504588	3	ATT	9	7	15,13,12,11,10,9,7	7	9	9	9	15	.	.	PTPN12	32707	.		cg25361236	chr7:77481758	-22817	.	.	PTPN12	.		245	0.055266	0.30643	4.5068e-21	8.8048e-15		1	0.596657	2.01207e-41	0.356
chr7:77064579-77064619	2	AC	22	16	36,33,32,31,30,29,28,27,26,25,24,23,22,21,20,19	19	20	22	26	36	.	.	SPDYE18	3699	.		cg01702095	chr7:77075127	10528	.	.	PMS2P9	.		245	-0.01004	0.23656	5.9376e-16	1.16001e-09		1	-0.42604	9.07595e-16	0.18151
chr7:77008761-77008880	6	CTTTTT	20	6	21,20,19,18,16,15	15	20	21	21	21	.	DTX2P1-UPK3BP1-PMS2P11	DTX2P1-UPK3BP1-PMS2P11	0	DTX2P1-UPK3BP1-PMS2P11_intron		cg20239921	chr7:77005309	-3511.5	.	DTX2P1-UPK3BP1-PMS2P11	DTX2P1-UPK3BP1-PMS2P11	.		215	-0.253324	0.26758	4.1204e-16	8.0499e-10		1	-0.53049	1.48076e-24	0.28142
chr7:76506036-76506049	2	GT	7	4	10,9,8,7	7	7	7	8	10	.	.	DTX2	42	.		cg16453056	chr7:76516315	10272.5	.	UPK3B	UPK3B	CpG:_32_Island		241	-0.060432	0.26888	5.4873e-18	1.07204e-11		0	0	0	0
chr7:76506036-76506049	2	GT	7	4	10,9,8,7	7	7	7	8	10	.	.	DTX2	42	.		cg16393713	chr7:76520192	14149.5	.	UPK3B	UPK3B	CpG:_32_Shelf_S		241	0.029477	0.30802	7.1699e-21	1.40076e-14		1	0.387505	3.86343e-12	0.15016
chr7:76506036-76506049	2	GT	7	4	10,9,8,7	7	7	7	8	10	.	.	DTX2	42	.		cg25126301	chr7:76480079	-25963.5	DTX2	DTX2	DTX2	.		231	0.163463	0.39478	8.9035e-27	1.73945e-20		1	0.579422	1.46206e-37	0.33573
chr7:76506036-76506049	2	GT	7	4	10,9,8,7	7	7	7	8	10	.	.	DTX2	42	.		cg19384697	chr7:76510605	4562.5	UPK3B	UPK3B	UPK3B	.		240	0.042621	0.42161	4.0034e-30	7.82132e-24		1	0.456673	4.28507e-19	0.20855
chr7:76506036-76506049	2	GT	7	4	10,9,8,7	7	7	7	8	10	.	.	DTX2	42	.		cg15798862	chr7:76500043	-5999.5	.	DTX2	DTX2	CpG:_19_Shore_N		242	-0.225544	0.57336	2.7466e-46	5.36595e-40		1	-0.788765	1.60421e-95	0.62215
chr7:76486847-76486887	3	CTG	14	11	24,23,22,21,20,19,18,17,16,15,14	14	14	17	20	24	.	DTX2	DTX2	0	DTX2_intron		cg19384697	chr7:76510605	23738	UPK3B	UPK3B	UPK3B	.		233	-0.009521	0.22814	1.109e-14	2.16662e-08		0	0	0	0
chr7:76486847-76486887	3	CTG	14	11	24,23,22,21,20,19,18,17,16,15,14	14	14	17	20	24	.	DTX2	DTX2	0	DTX2_intron		cg25126301	chr7:76480079	-6788	DTX2	DTX2	DTX2	.		224	-0.041768	0.2579	4.348e-16	8.49456e-10		0	0	0	0
chr7:76486847-76486887	3	CTG	14	11	24,23,22,21,20,19,18,17,16,15,14	14	14	17	20	24	.	DTX2	DTX2	0	DTX2_intron		cg15798862	chr7:76500043	13176	.	DTX2	DTX2	CpG:_19_Shore_N		236	0.053002	0.32918	4.651e-22	9.08652e-16		0	0	0	0
chr7:76349419-76349467	2	AC	25	8	27,26,25,24,23,22,20,16	16	23	25	25	27	.	YWHAG	YWHAG	0	YWHAG_intron		cg22830091	chr7:76332367	-17076	.	YWHAG	YWHAG	CpG:_23_Shelf_S		124	0.045562	0.39943	3.5037e-15	6.84507e-09		1	0.51924	2.66723e-12	0.26961
chr7:76331287-76331307	5	AGAGG	4	6	9,7,6,5,4,3	3	4	6	6	9	.	YWHAG	YWHAG	0	YWHAG_intron		cg10193107	chr7:76294953	-36344	.	.	HSPB1	.		238	0.071272	0.15381	3.5738e-10	0.000698203		1	0.406583	4.8267e-14	0.16531
chr7:76331287-76331307	5	AGAGG	4	6	9,7,6,5,4,3	3	4	6	6	9	.	YWHAG	YWHAG	0	YWHAG_intron		cg22830091	chr7:76332367	1070	.	YWHAG	YWHAG	CpG:_23_Shelf_S		125	-0.060558	0.50505	1.6474e-20	3.21848e-14		1	-0.748605	1.38484e-40	0.56041
chr7:76088619-76088646	2	AC	15	6	18,17,16,15,14,13	13	15	15	17	18	.	.	GTF2IP7	3417	.		cg16489192	chr7:76048795	-39837.5	MDH2,STYXL1	MDH2	MDH2	CpG:_59_Shore_S		242	-0.01908	0.14968	4.6157e-10	0.000901755		1	-0.494702	1.78346e-23	0.24473
chr7:76078184-76078277	4	AAAG	24	8	26,25,24,23,22,21,20,18	18	21	23	24	26	.	.	MDH2	10677	.		cg16489192	chr7:76048795	-29435.5	MDH2,STYXL1	MDH2	MDH2	CpG:_59_Shore_S		243	0.016829	0.22054	9.852e-15	1.92476e-08		1	0.477954	9.03464e-21	0.22844
chr7:76005813-76005949	3	AGG	46	3	46,39,38	38	39	39	46	46	.	STYXL1	STYXL1	0	STYXL1_intron		cg16489192	chr7:76048795	42914	MDH2,STYXL1	MDH2	MDH2	CpG:_59_Shore_S		221	-0.006761	0.1995	3.1045e-12	6.06517e-06		1	-0.475763	7.77463e-16	0.22635
chr7:76005813-76005949	3	AGG	46	3	46,39,38	38	39	39	46	46	.	STYXL1	STYXL1	0	STYXL1_intron		cg10917109	chr7:76008424	2543	.	STYXL1	STYXL1	.		222	0.02756	0.47669	8.9568e-33	1.74986e-26		1	0.746224	3.41459e-60	0.55685
chr7:75715459-75715487	2	AG	18	8	20,19,18,17,16,15,14,13	13	17	18	18	20	.	HIP1	HIP1	0	HIP1_intron		cg13868266	chr7:75721632	6159	.	HIP1	HIP1	.		245	0.020341	0.26467	5.8944e-18	1.15157e-11		1	0.437539	2.18335e-17	0.19144
chr7:745428-745442	2	AC	8	4	10,8,7,6	6	8	8	10	10	.	DNAAF5	DNAAF5	0	DNAAF5_intron		cg03113739	chr7:732375	-13060	.	DNAAF5	DNAAF5	.		227	0.049555	0.26641	7.4252e-17	1.45064e-10		1	0.560803	4.92046e-30	0.3145
chr7:745428-745442	2	AC	8	4	10,8,7,6	6	8	8	10	10	.	DNAAF5	DNAAF5	0	DNAAF5_intron		cg22624116	chr7:726196	-19239	DNAAF5,PRKAR1B	PRKAR1B	PRKAR1B	CpG:_87_Shore_N		222	0.06039	0.50019	5.5862e-35	1.09136e-28		1	0.703569	2.66312e-58	0.49501
chr7:745428-745442	2	AC	8	4	10,8,7,6	6	8	8	10	10	.	DNAAF5	DNAAF5	0	DNAAF5_intron		cg11064039	chr7:726463	-18972	DNAAF5,PRKAR1B	PRKAR1B	PRKAR1B	CpG:_87_Island		226	0.130348	0.73103	8.3161e-66	1.62469e-59		1	0.787401	2.08352e-84	0.62
chr7:745428-745442	2	AC	8	4	10,8,7,6	6	8	8	10	10	.	DNAAF5	DNAAF5	0	DNAAF5_intron		cg06242242	chr7:726467	-18968	DNAAF5,PRKAR1B	PRKAR1B	PRKAR1B	CpG:_87_Island		226	0.157421	0.75967	2.7309e-71	5.33528e-65		1	0.866712	2.95498e-123	0.75119
chr7:74396461-74396481	2	GT	11	3	11,10,9	9	9	10	11	11	.	CLIP2	CLIP2	0	CLIP2_intron		cg17934823	chr7:74365666	-30805	.	CLIP2	CLIP2	.		245	-0.039115	0.15666	1.2932e-10	0.000252649		1	-0.301242	3.58958e-05	0.090747
chr7:74264199-74264249	5	ATTTT	11	7	15,14,13,12,11,10,9	9	11	11	11	15	.	.	RFC2	9742	.		cg14522298	chr7:74231453	-32771	.	.	RFC2	.		237	0.054003	0.18691	3.265e-12	6.37873e-06		1	0.411035	2.04828e-14	0.16895
chr7:74264199-74264249	5	ATTTT	11	7	15,14,13,12,11,10,9	9	11	11	11	15	.	.	RFC2	9742	.		cg04650104	chr7:74236024	-28200	.	RFC2	RFC2	.		239	-0.049745	0.3111	6.0951e-21	1.19078e-14		1	-0.457832	1.07482e-19	0.20961
chr7:73855185-73855239	2	AC	28	14	36,34,33,32,31,30,29,28,27,26,25,24,22,21	21	25	27	29	36	.	.	TMEM270	5920	.		cg13873100	chr7:73842736	-12476	WBSCR27	.	WBSCR27	CpG:_22_Shore_S		243	-0.008701	0.16339	5.747e-11	0.000112277		1	-0.314143	8.55467e-06	0.098686
chr7:73855185-73855239	2	AC	28	14	36,34,33,32,31,30,29,28,27,26,25,24,22,21	21	25	27	29	36	.	.	TMEM270	5920	.		cg03781731	chr7:73842086	-13126	WBSCR27	WBSCR27	WBSCR27	CpG:_22_Shore_N		240	-0.024935	0.1994	3.6551e-13	7.14086e-07		1	-0.394005	1.30006e-12	0.15524
chr7:73855185-73855239	2	AC	28	14	36,34,33,32,31,30,29,28,27,26,25,24,22,21	21	25	27	29	36	.	.	TMEM270	5920	.		cg02237119	chr7:73842084	-13128	WBSCR27	WBSCR27	WBSCR27	CpG:_22_Shore_N		244	-0.020345	0.20472	1.0234e-13	1.99939e-07		1	-0.396611	6.68569e-13	0.1573
chr7:73855185-73855239	2	AC	28	14	36,34,33,32,31,30,29,28,27,26,25,24,22,21	21	25	27	29	36	.	.	TMEM270	5920	.		cg03322334	chr7:73842753	-12459	WBSCR27	.	WBSCR27	CpG:_22_Shore_S		244	-0.011242	0.21231	3.1545e-14	6.16285e-08		1	-0.354203	4.46437e-09	0.12546
chr7:73855185-73855239	2	AC	28	14	36,34,33,32,31,30,29,28,27,26,25,24,22,21	21	25	27	29	36	.	.	TMEM270	5920	.		cg15318792	chr7:73842715	-12497	WBSCR27	.	WBSCR27	CpG:_22_Shore_S		243	-0.031939	0.26597	6.4855e-18	1.26705e-11		1	-0.413981	2.39593e-14	0.17138
chr7:73855185-73855239	2	AC	28	14	36,34,33,32,31,30,29,28,27,26,25,24,22,21	21	25	27	29	36	.	.	TMEM270	5920	.		cg01679206	chr7:73838719	-16493	.	WBSCR27	WBSCR27	CpG:_22_Shelf_N		244	-0.02455	0.27934	5.8501e-19	1.14292e-12		1	-0.529235	4.60394e-29	0.28009
chr7:73835121-73835247	6	CCCTCT	21	5	21,20,19,17,14	14	19	20	21	21	.	METTL27	METTL27	0	METTL27_intron		cg03322334	chr7:73842753	7569	WBSCR27	.	WBSCR27	CpG:_22_Shore_S		236	-0.021777	0.16557	7.9636e-11	0.000155582		1	-0.341731	6.49132e-06	0.11678
chr7:73835121-73835247	6	CCCTCT	21	5	21,20,19,17,14	14	19	20	21	21	.	METTL27	METTL27	0	METTL27_intron		cg15318792	chr7:73842715	7531	WBSCR27	.	WBSCR27	CpG:_22_Shore_S		235	-0.059246	0.19289	1.6805e-12	3.28314e-06		1	-0.317049	0.000360231	0.10052
chr7:73835121-73835247	6	CCCTCT	21	5	21,20,19,17,14	14	19	20	21	21	.	METTL27	METTL27	0	METTL27_intron		cg02237119	chr7:73842084	6900	WBSCR27	WBSCR27	WBSCR27	CpG:_22_Shore_N		236	-0.043336	0.19536	1.0464e-12	2.04432e-06		1	-0.417947	9.35527e-12	0.17468
chr7:73835121-73835247	6	CCCTCT	21	5	21,20,19,17,14	14	19	20	21	21	.	METTL27	METTL27	0	METTL27_intron		cg03781731	chr7:73842086	6902	WBSCR27	WBSCR27	WBSCR27	CpG:_22_Shore_N		232	-0.060565	0.24452	1.0394e-15	2.03064e-09		1	-0.445444	3.26778e-14	0.19842
chr7:73835121-73835247	6	CCCTCT	21	5	21,20,19,17,14	14	19	20	21	21	.	METTL27	METTL27	0	METTL27_intron		cg01679206	chr7:73838719	3535	.	WBSCR27	WBSCR27	CpG:_22_Shelf_N		236	-0.057055	0.32021	2.2309e-21	4.35844e-15		1	-0.516972	5.9998e-22	0.26726
chr7:73796583-73796618	3	ATT	12	3	14,13,12	12	12	12	12	14	.	.	CLDN3	26314	.		cg13873100	chr7:73842736	46135.5	WBSCR27	.	WBSCR27	CpG:_22_Shore_S		244	-0.060655	0.25504	3.3854e-17	6.61395e-11		1	-0.356314	2.76824e-09	0.12696
chr7:73796583-73796618	3	ATT	12	3	14,13,12	12	12	12	12	14	.	.	CLDN3	26314	.		cg02237119	chr7:73842084	45483.5	WBSCR27	WBSCR27	WBSCR27	CpG:_22_Shore_N		245	-0.133566	0.28163	3.3557e-19	6.55593e-13		1	-0.493518	2.02636e-24	0.24356
chr7:73796583-73796618	3	ATT	12	3	14,13,12	12	12	12	12	14	.	.	CLDN3	26314	.		cg03322334	chr7:73842753	46152.5	WBSCR27	.	WBSCR27	CpG:_22_Shore_S		245	-0.074987	0.30258	8.8849e-21	1.73582e-14		1	-0.402293	9.93096e-14	0.16184
chr7:73796583-73796618	3	ATT	12	3	14,13,12	12	12	12	12	14	.	.	CLDN3	26314	.		cg03781731	chr7:73842086	45485.5	WBSCR27	WBSCR27	WBSCR27	CpG:_22_Shore_N		241	-0.175203	0.3114	3.9676e-21	7.75138e-15		1	-0.490887	5.28885e-24	0.24097
chr7:73796583-73796618	3	ATT	12	3	14,13,12	12	12	12	12	14	.	.	CLDN3	26314	.		cg12169661	chr7:73769064	-27536.5	CLDN3	CLDN3	CLDN3	CpG:_157_Island		245	0.203323	0.31267	1.4887e-21	2.90843e-15		1	0.477514	2.64413e-22	0.22802
chr7:73796583-73796618	3	ATT	12	3	14,13,12	12	12	12	12	14	.	.	CLDN3	26314	.		cg15318792	chr7:73842715	46114.5	WBSCR27	.	WBSCR27	CpG:_22_Shore_S		244	-0.219739	0.40327	5.9312e-29	1.15876e-22		1	-0.474805	1.27362e-21	0.22544
chr7:73796583-73796618	3	ATT	12	3	14,13,12	12	12	12	12	14	.	.	CLDN3	26314	.		cg01679206	chr7:73838719	42118.5	.	WBSCR27	WBSCR27	CpG:_22_Shelf_N		245	-0.179812	0.4807	1.9484e-36	3.80653e-30		1	-0.582546	1.73675e-38	0.33936
chr7:73796326-73796375	5	ATTTT	11	6	12,11,10,9,8,7	7	9	10	10	12	.	.	CLDN3	26057	.		cg02237119	chr7:73842084	45733.5	WBSCR27	WBSCR27	WBSCR27	CpG:_22_Shore_N		244	0.050142	0.15663	1.4166e-10	0.000276757		1	0.40603	4.56773e-14	0.16486
chr7:73796326-73796375	5	ATTTT	11	6	12,11,10,9,8,7	7	9	10	10	12	.	.	CLDN3	26057	.		cg03781731	chr7:73842086	45735.5	WBSCR27	WBSCR27	WBSCR27	CpG:_22_Shore_N		240	0.066298	0.17392	1.6228e-11	3.17042e-05		1	0.42638	3.7086e-16	0.1818
chr7:73796326-73796375	5	ATTTT	11	6	12,11,10,9,8,7	7	9	10	10	12	.	.	CLDN3	26057	.		cg12169661	chr7:73769064	-27286.5	CLDN3	CLDN3	CLDN3	CpG:_157_Island		244	-0.07885	0.18714	1.5076e-12	2.94535e-06		1	-0.388742	2.29786e-12	0.15112
chr7:73796326-73796375	5	ATTTT	11	6	12,11,10,9,8,7	7	9	10	10	12	.	.	CLDN3	26057	.		cg03322334	chr7:73842753	46402.5	WBSCR27	.	WBSCR27	CpG:_22_Shore_S		244	0.030443	0.19706	3.3284e-13	6.5026e-07		1	0.365116	3.3819e-10	0.13331
chr7:73796326-73796375	5	ATTTT	11	6	12,11,10,9,8,7	7	9	10	10	12	.	.	CLDN3	26057	.		cg13873100	chr7:73842736	46385.5	WBSCR27	.	WBSCR27	CpG:_22_Shore_S		243	0.028304	0.22005	1.0653e-14	2.08124e-08		1	0.367668	3.37015e-10	0.13518
chr7:73796326-73796375	5	ATTTT	11	6	12,11,10,9,8,7	7	9	10	10	12	.	.	CLDN3	26057	.		cg15318792	chr7:73842715	46364.5	WBSCR27	.	WBSCR27	CpG:_22_Shore_S		243	0.096942	0.31127	2.7844e-21	5.4398e-15		1	0.472525	3.18557e-21	0.22328
chr7:73796326-73796375	5	ATTTT	11	6	12,11,10,9,8,7	7	9	10	10	12	.	.	CLDN3	26057	.		cg01679206	chr7:73838719	42368.5	.	WBSCR27	WBSCR27	CpG:_22_Shelf_N		244	0.074862	0.33077	6.9324e-23	1.35436e-16		1	0.49939	3.66906e-25	0.24939
chr7:73789566-73789595	3	ATT	10	7	16,13,12,11,10,8,7	7	10	10	11	16	.	.	CLDN3	19297	.		cg12169661	chr7:73769064	-20516.5	CLDN3	CLDN3	CLDN3	CpG:_157_Island		245	0.086295	0.36043	2.1993e-25	4.29671e-19		1	0.487596	9.63558e-24	0.23775
chr7:73789566-73789595	3	ATT	10	7	16,13,12,11,10,8,7	7	10	10	11	16	.	.	CLDN3	19297	.		cg01679206	chr7:73838719	49138.5	.	WBSCR27	WBSCR27	CpG:_22_Shelf_N		245	-0.064276	0.39306	3.6379e-28	7.10726e-22		1	-0.563028	3.37466e-35	0.317
chr7:73775441-73775483	4	ATTT	11	3	12,11,10	10	10	11	11	12	.	.	CLDN3	5172	.		cg12169661	chr7:73769064	-6398	CLDN3	CLDN3	CLDN3	CpG:_157_Island		245	-0.238053	0.47383	9.688e-36	1.89272e-29		1	-0.632258	9.15777e-49	0.39975
chr7:73775441-73775483	4	ATTT	11	3	12,11,10	10	10	11	11	12	.	.	CLDN3	5172	.		cg17240725	chr7:73735026	-40436	ABHD11-AS1	.	ABHD11-AS1	CpG:_88_Shelf_N		243	-0.375803	0.55435	3.4727e-44	6.78451e-38		1	-0.731731	1.76735e-75	0.53543
chr7:73768120-73768159	2	GT	20	11	26,24,23,22,21,20,19,18,17,16,15	15	19	20	20	26	.	.	CLDN3	838	.		cg09943102	chr7:73743458	-24681.5	.	.	ABHD11	.		243	0.021629	0.22982	2.2836e-15	4.4614e-09		1	0.488805	7.61353e-24	0.23893
chr7:73768120-73768159	2	GT	20	11	26,24,23,22,21,20,19,18,17,16,15	15	19	20	20	26	.	.	CLDN3	838	.		cg17240725	chr7:73735026	-33113.5	ABHD11-AS1	.	ABHD11-AS1	CpG:_88_Shelf_N		241	-0.060448	0.27096	3.8889e-18	7.59763e-12		1	-0.52829	1.70982e-29	0.27909
chr7:73768120-73768159	2	GT	20	11	26,24,23,22,21,20,19,18,17,16,15	15	19	20	20	26	.	.	CLDN3	838	.		cg26010879	chr7:73742887	-25252.5	.	.	ABHD11	CpG:_88_Shelf_S		243	0.031728	0.34291	9.1842e-24	1.79429e-17		1	0.566763	9.2576e-36	0.32122
chr7:73768120-73768159	2	GT	20	11	26,24,23,22,21,20,19,18,17,16,15	15	19	20	20	26	.	.	CLDN3	838	.		cg19928597	chr7:73743053	-25086.5	.	.	ABHD11	CpG:_88_Shelf_S		243	0.030065	0.37399	2.5634e-26	5.00804e-20		1	0.588124	2.00111e-39	0.34589
chr7:73733663-73733683	2	AC	11	4	13,12,11,10	10	11	11	12	13	ABHD11-AS1	.	ABHD11-AS1	1386	.		cg12169661	chr7:73769064	35391	CLDN3	CLDN3	CLDN3	CpG:_157_Island		245	0.185266	0.33503	2.5882e-23	5.05649e-17		1	0.54858	3.77672e-32	0.30094
chr7:73733663-73733683	2	AC	11	4	13,12,11,10	10	11	11	12	13	ABHD11-AS1	.	ABHD11-AS1	1386	.		cg17240725	chr7:73735026	1353	ABHD11-AS1	.	ABHD11-AS1	CpG:_88_Shelf_N		243	0.339837	0.53111	1.622e-41	3.16885e-35		1	0.660992	2.64139e-54	0.43691
chr7:72098765-72098802	2	AC	21	15	30,29,28,27,26,25,24,23,22,21,20,19,18,17,16	16	18	21	24	30	.	CALN1	CALN1	0	CALN1_intron		cg11375451	chr7:72114329	15545.5	.	CALN1	CALN1	.		245	0.009338	0.29602	2.8011e-20	5.47243e-14		0	0	0	0
chr7:72081407-72081443	2	GT	19	12	39,38,37,36,35,34,33,32,31,30,29,19	19	19	31	33	39	.	CALN1	CALN1	0	CALN1_intron		cg11375451	chr7:72114329	32904	.	CALN1	CALN1	.		245	0.003696	0.20055	1.7364e-13	3.39235e-07		1	0.479218	7.739e-22	0.22965
chr7:71482082-71482114	2	GT	19	16	32,31,30,29,28,26,25,24,23,22,21,20,19,18,16,14	14	20	20	23	32	.	GALNT17	GALNT17	0	GALNT17_intron		cg00240732	chr7:71458411	-23687	.	WBSCR17	WBSCR17	.		243	-0.009298	0.16325	5.8622e-11	0.000114528		1	-0.336749	1.68118e-07	0.1134
chr7:70862319-70862341	4	AAAT	6	3	7,6,4	4	6	7	7	7	.	.	AUTS2	68814	.		cg18138580	chr7:70829278	-33052	.	.	AUTS2	.		146	0.094768	0.25131	1.1571e-10	0.000226059		0	0	0	0
chr7:70862319-70862341	4	AAAT	6	3	7,6,4	4	6	7	7	7	.	.	AUTS2	68814	.		cg20121472	chr7:70851458	-10872	.	.	AUTS2	.		244	0.046188	0.20271	1.3968e-13	2.72889e-07		1	0.455917	1.44055e-19	0.20786
chr7:70859936-70859986	2	AC	26	14	31,29,27,26,25,24,23,22,21,20,19,15,12,11	11	11	22	23	31	.	.	AUTS2	66431	.		cg20121472	chr7:70851458	-8503	.	.	AUTS2	.		244	0.003869	0.16859	2.4284e-11	4.74429e-05		1	0.445993	1.13832e-17	0.19891
chr7:70845027-70845052	2	GT/AT	16	9	24,23,22,21,20,19,18,17,16	16	17	20	20	24	.	.	AUTS2	51522	.		cg20121472	chr7:70851458	6418.5	.	.	AUTS2	.		244	-0.010638	0.17951	4.7574e-12	9.29439e-06		1	-0.457963	2.68289e-19	0.20973
chr7:70845027-70845052	2	GT/AT	16	9	24,23,22,21,20,19,18,17,16	16	17	20	20	24	.	.	AUTS2	51522	.		cg18138580	chr7:70829278	-15761.5	.	.	AUTS2	.		146	0.030683	0.3624	9.2186e-16	1.80101e-09		1	0.449255	3.2026e-09	0.20183
chr7:70828703-70828735	2	GT	18	11	23,22,21,20,19,18,17,16,15,14,13	13	13	16	19	23	.	.	AUTS2	35198	.		cg18138580	chr7:70829278	559	.	.	AUTS2	.		146	0.018576	0.39432	2.1942e-17	4.28674e-11		1	0.441237	5.91465e-09	0.19469
chr7:70823359-70823396	2	GT	21	16	32,30,29,28,27,26,25,24,23,22,21,20,19,18,17,16	16	17	19	22	32	.	.	AUTS2	29854	.		cg18138580	chr7:70829278	5900.5	.	.	AUTS2	.		146	0.014982	0.43218	2.0116e-19	3.93e-13		1	0.461563	2.61203e-10	0.21304
chr7:70820622-70820643	2	AT	11	19	29,27,26,25,24,23,22,21,20,19,18,16,15,14,13,12,11,10,9	9	11	13	14	29	.	.	AUTS2	27117	.		cg18138580	chr7:70829278	8645.5	.	.	AUTS2	.		140	0.011444	0.48531	1.2068e-21	2.35769e-15		1	0.370581	0.000799054	0.13733
chr7:70696675-70696696	2	AC	13	5	16,15,14,13,12	12	13	13	14	16	.	AUTS2	AUTS2	0	AUTS2_intron		cg14829677	chr7:70737046	40360.5	.	AUTS2	AUTS2	.		243	-0.046842	0.22921	2.5133e-15	4.91016e-09		1	-0.439784	1.35642e-17	0.19341
chr7:69927180-69927220	2	AT	21	8	27,26,25,24,23,22,21,20	20	21	21	22	27	.	AUTS2	AUTS2	0	AUTS2_intron		cg07583744	chr7:69894251	-32949	.	AUTS2	AUTS2	.		245	0.056488	0.2909	6.8143e-20	1.33129e-13		1	0.440409	1.15412e-17	0.19396
chr7:69926425-69926513	4	ATCT/ACCT	22	10	26,25,24,23,22,21,20,19,18,17	17	21	22	23	26	.	AUTS2	AUTS2	0	AUTS2_intron		cg07583744	chr7:69894251	-32218	.	AUTS2	AUTS2	.		245	-0.048595	0.50929	1.9462e-39	3.80223e-33		1	-0.643413	1.43644e-50	0.41398
chr7:69914326-69914395	2	AC	35	12	41,40,39,38,37,36,35,34,33,31,30,24	24	35	36	36	41	.	AUTS2	AUTS2	0	AUTS2_intron		cg07583744	chr7:69894251	-20109.5	.	AUTS2	AUTS2	.		245	-0.042058	0.19323	5.3534e-13	1.04588e-06		1	-0.486128	3.53556e-19	0.23632
chr7:69888541-69888572	2	AT	16	16	27,25,23,22,21,20,19,18,17,16,15,14,13,12,11,8	8	16	16	18	27	.	AUTS2	AUTS2	0	AUTS2_intron		cg07583744	chr7:69894251	5694.5	.	AUTS2	AUTS2	.		241	-0.035621	0.32068	7.7385e-22	1.51185e-15		1	-0.474595	2.02127e-20	0.22524
chr7:69879121-69879157	2	GT	19	7	21,20,19,18,17,16,15	15	15	17	17	21	.	AUTS2	AUTS2	0	AUTS2_intron		cg07583744	chr7:69894251	15112	.	AUTS2	AUTS2	.		245	-0.057121	0.33189	4.61e-23	9.00642e-17		1	-0.430174	1.75842e-16	0.18505
chr7:69870449-69870466	2	AT	10	18	27,26,25,24,23,22,21,20,19,18,17,16,15,14,13,12,10,8	8	17	22	23	27	.	AUTS2	AUTS2	0	AUTS2_intron		cg07583744	chr7:69894251	23793.5	.	AUTS2	AUTS2	.		212	-0.019899	0.24122	2.8514e-14	5.57069e-08		1	-0.453387	7.08012e-15	0.20556
chr7:67438591-67438663	2	AG	40	6	41,40,39,38,37,36	36	37	37	40	41	.	.	LINC01372	98567	.		cg02326500	chr7:67439176	549	.	.	LINC01372	.		166	-0.016726	0.32108	1.7555e-15	3.42967e-09		0	0	0	0
chr7:6705720-6705756	4	AAAC	9	3	11,10,9	9	9	9	9	11	ZNF12	ZNF12	ZNF12	0	ZNF12_intron		cg09896999	chr7:6707346	1608	ZNF12	.	ZNF12	CpG:_98_Shore_S		241	-0.046072	0.14985	4.8926e-10	0.000955853		0	0	0	0
chr7:6705720-6705756	4	AAAC	9	3	11,10,9	9	9	9	9	11	ZNF12	ZNF12	ZNF12	0	ZNF12_intron		cg20012315	chr7:6700967	-4771	.	ZNF12	ZNF12	.		184	-0.680517	0.72788	2.5258e-53	4.93458e-47		1	-0.74765	1.15981e-74	0.55898
chr7:6703040-6703065	2	AC	13	6	16,15,14,13,12,11	11	13	13	13	16	.	ZNF12	ZNF12	0	ZNF12_intron		cg20012315	chr7:6700967	-2085.5	.	ZNF12	ZNF12	.		180	0.264418	0.3076	6.5895e-16	1.28737e-09		1	0.451796	2.81835e-17	0.20412
chr7:66941562-66941598	2	AC	19	11	25,22,21,20,19,18,17,16,15,14,12	12	18	19	19	25	.	TMEM248	TMEM248	0	TMEM248_intron		cg22401824	chr7:66894733	-46847	.	.	TMEM248	.		245	0.026691	0.32716	1.0946e-22	2.13849e-16		1	0.571411	3.14407e-36	0.32651
chr7:6692875-6692905	2	AC	16	3	17,16,15	15	16	16	16	17	.	ZNF12	ZNF12	0	ZNF12_intron		cg22772380	chr7:6707406	14516	ZNF12	.	ZNF12	CpG:_98_Shore_S		243	-0.122006	0.16032	9.005e-11	0.000175928		1	-0.426321	2.04789e-16	0.18175
chr7:66916184-66916241	3	ATT	19	10	20,19,18,17,16,15,14,13,12,11	11	14	17	17	20	.	.	TMEM248	4984	.		cg00403202	chr7:66886599	-29613.5	.	.	TMEM248	.		244	0.010865	0.15329	2.3091e-10	0.000451122		0	0	0	0
chr7:66916184-66916241	3	ATT	19	10	20,19,18,17,16,15,14,13,12,11	11	14	17	17	20	.	.	TMEM248	4984	.		cg22401824	chr7:66894733	-21479.5	.	.	TMEM248	.		245	0.016256	0.23222	1.1927e-15	2.33014e-09		1	0.471657	1.67693e-21	0.22246
chr7:66909388-66909405	2	AT	12	4	18,14,13,12	12	12	12	12	18	.	.	LINC02604	3092	.		cg22401824	chr7:66894733	-14663.5	.	.	TMEM248	.		244	-0.104239	0.39228	5.469e-28	1.06846e-21		1	-0.613686	6.38405e-45	0.37661
chr7:66670895-66670925	2	AC	16	12	25,24,23,22,21,20,19,18,17,16,15,14	14	16	16	17	25	.	RABGEF1	RABGEF1	0	RABGEF1_intron		cg24904103	chr7:66681641	10731	RABGEF1	.	RABGEF1	CpG:_135_Shore_N		245	0.01274	0.19614	3.4249e-13	6.69112e-07		1	0.298938	4.71551e-05	0.089364
chr7:66634193-66634229	4	ATCT	9	7	13,12,11,10,9,8,6	6	9	9	11	13	.	KCTD7	KCTD7	0	KCTD7_intron		cg03038448	chr7:66619423	-14788	.	.	KCTD7	.		245	-0.028657	0.23329	1.0046e-15	1.96266e-09		1	-0.295313	0.000100991	0.08721
chr7:66494579-66494597	2	AT	10	11	21,19,18,17,16,14,13,12,11,10,9	9	10	10	12	21	.	GS1-124K5.4	GS1-124K5.4	0	GS1-124K5.4_intron		cg13147721	chr7:66476825	-17763	.	.	GS1-124K5.4	CpG:_50_Shelf_S,CpG:_50_Shore_S		241	-0.028595	0.21806	1.8661e-14	3.64574e-08		1	-0.448453	7.82102e-19	0.20111
chr7:66303392-66303416	4	ATGT	6	8	16,14,13,12,11,10,8,6	6	6	11	12	16	.	TPST1	TPST1	0	TPST1_intron		cg10691866	chr7:66352295	48891	.	TPST1	TPST1	.		244	-0.0189	0.21564	1.8738e-14	3.66079e-08		0	0	0	0
chr7:6626135-6626149	2	AT	8	3	10,9,8	8	8	8	8	10	.	.	ZNF853	1846	.		cg19707454	chr7:6577046	-49096	ZDHHC4	.	ZDHHC4	CpG:_38_Shore_N		239	0.235398	0.27656	2.1261e-18	4.1537e-12		1	0.564137	1.21703e-35	0.31825
chr7:65988752-65988792	5	AAAAC	8	5	9,8,7,6,5	5	7	7	8	9	.	.	GUSB	6540	.		cg00343986	chr7:65979369	-9403	.	GUSB	GUSB	CpG:_66_Shelf_N		242	0.016938	0.201	2.2836e-13	4.4614e-07		1	0.395765	3.40284e-13	0.15663
chr7:65814334-65814350	2	AT	10	6	16,15,14,13,12,10	10	10	10	10	16	.	.	LOC441242	43525	.		cg11271990	chr7:65820844	6502	.	.	LOC441242	.		241	0.042807	0.33526	5.6655e-23	1.10685e-16		1	0.64873	4.82709e-44	0.42085
chr7:65751917-65751943	4	ATTT	7	4	9,8,7,6	6	7	7	8	9	LOC441242	CCT6P1,LOC441242	LOC441242,CCT6P1	0	CCT6P1_intron,LOC441242_intron		cg05627663	chr7:65754961	3031	SNORA22	CCT6P1,LOC441242	LOC441242	CpG:_78_Shelf_S		244	0.069186	0.36228	1.9363e-25	3.78289e-19		1	0.539583	4.24768e-31	0.29115
chr7:65746100-65746149	2	AC	25	15	32,28,27,26,25,24,23,22,21,20,18,17,16,15,14	14	16	23	23	32	.	LOC441242	LOC441242	0	LOC441242_intron		cg05627663	chr7:65754961	8836.5	SNORA22	CCT6P1,LOC441242	LOC441242	CpG:_78_Shelf_S		244	-0.010288	0.39589	2.6471e-28	5.17156e-22		1	-0.559482	3.36585e-33	0.31302
chr7:65622843-65622875	2	AC	19	9	26,25,24,23,22,21,20,19,18	18	19	23	23	26	.	.	LOC441242	24136	.		cg07183775	chr7:65643709	20849	.	.	LOC441242	CpG:_102_Shelf_N		244	-0.037908	0.18721	1.4912e-12	2.91331e-06		1	-0.442617	3.73385e-18	0.19591
chr7:65622843-65622875	2	AC	19	9	26,25,24,23,22,21,20,19,18	18	19	23	23	26	.	.	LOC441242	24136	.		cg00129524	chr7:65647539	24681	INTS4P2	LOC441242	LOC441242	CpG:_102_Island		235	0.007912	0.22349	1.733e-14	3.38571e-08		0	0	0	0
chr7:65234604-65234633	2	AC	17	12	26,25,24,23,22,21,20,19,18,17,16,14	14	17	18	21	26	.	.	INTS4P1	383	.		cg13827984	chr7:65239609	4986.5	.	.	ZNF92	CpG:_60_Island		245	-0.009711	0.16783	2.4759e-11	4.83709e-05		1	-0.378286	1.88393e-11	0.1431
chr7:65106431-65106528	5	CTTTT	20	4	21,20,19,17	17	17	20	20	21	.	.	CCT6P3	31719	.		cg20849893	chr7:65080815	-25664.5	.	.	CCT6P3	CpG:_46_Island		242	-0.034011	0.15235	3.1361e-10	0.00061269		1	-0.398422	7.53229e-13	0.15874
chr7:65106431-65106528	5	CTTTT	20	4	21,20,19,17	17	17	20	20	21	.	.	CCT6P3	31719	.		cg04775059	chr7:65081009	-25470.5	.	.	CCT6P3	CpG:_46_Island		244	-0.051199	0.21551	1.9115e-14	3.73444e-08		1	-0.436245	1.35568e-16	0.19031
chr7:65106431-65106528	5	CTTTT	20	4	21,20,19,17	17	17	20	20	21	.	.	CCT6P3	31719	.		cg12143784	chr7:65081545	-24934.5	.	.	CCT6P3	CpG:_46_Shore_S		245	-0.03936	0.28996	8.0198e-20	1.5668e-13		1	-0.574891	7.05702e-36	0.3305
chr7:65041014-65041040	4	AAAT	7	3	9,8,7	7	7	7	8	9	.	CCT6P3	CCT6P3	0	CCT6P3_intron		cg04775059	chr7:65081009	39982	.	.	CCT6P3	CpG:_46_Island		244	0.144616	0.21975	9.8406e-15	1.92253e-08		1	0.42665	3.83857e-16	0.18203
chr7:65041014-65041040	4	AAAT	7	3	9,8,7	7	7	7	8	9	.	CCT6P3	CCT6P3	0	CCT6P3_intron		cg12143784	chr7:65081545	40518	.	.	CCT6P3	CpG:_46_Shore_S		245	0.118716	0.3363	2.0473e-23	3.99975e-17		1	0.570763	2.74357e-36	0.32577
chr7:65041014-65041040	4	AAAT	7	3	9,8,7	7	7	7	8	9	.	CCT6P3	CCT6P3	0	CCT6P3_intron		cg24247132	chr7:64998264	-42763	.	ERV3-1	ERV3-1	.		244	-0.117849	0.44171	1.8001e-32	3.5168e-26		1	-0.6503	1.65701e-52	0.42289
chr7:65030789-65030829	3	AAG	14	3	16,14,13	13	13	13	14	16	.	.	CCT6P3	7525	.		cg24247132	chr7:64998264	-32545	.	ERV3-1	ERV3-1	.		244	-0.110799	0.39478	3.3143e-28	6.47505e-22		1	-0.622993	1.17937e-46	0.38812
chr7:65030789-65030829	3	AAG	14	3	16,14,13	13	13	13	14	16	.	.	CCT6P3	7525	.		cg15427793	chr7:64990548	-40261	ZNF117	ERV3-1,ZNF117	ERV3-1	.		236	0.283872	0.67478	5.3145e-59	1.03828e-52		1	0.791663	4.6519e-98	0.62673
chr7:64971306-64971356	4	AAAT/AAAC	13	6	15,14,13,12,11,10	10	11	12	13	15	.	.	ZNF117,ERV3-1-ZNF117	420	.		cg15427793	chr7:64990548	19217	ZNF117	ERV3-1,ZNF117	ERV3-1	.		236	-0.071352	0.22381	1.4523e-14	2.83731e-08		1	-0.468113	7.68106e-21	0.21913
chr7:64864378-64864400	2	GT	13	7	18,17,16,15,14,13,12	12	14	14	17	18	.	.	ZNF138	3556	.		cg13558914	chr7:64882385	17996	.	.	ZNF273	.		244	0.036237	0.16767	2.7841e-11	5.43921e-05		1	0.413534	5.83498e-15	0.17101
chr7:64864378-64864400	2	GT	13	7	18,17,16,15,14,13,12	12	14	14	17	18	.	.	ZNF138	3556	.		cg19774365	chr7:64882619	18230	.	.	ZNF273	.		245	0.034714	0.17746	5.859e-12	1.14466e-05		1	0.364568	3.04365e-10	0.13291
chr7:6456469-6456508	2	AT	21	19	30,29,28,27,26,25,24,23,22,21,20,19,17,15,12,11,10,8,6	6	21	24	27	30	.	.	KDELR2	4581	.		cg08352530	chr7:6410350	-46138.5	.	DAGLB	DAGLB	.		195	-0.004825	0.18307	4.4029e-10	0.000860181		0	0	0	0
chr7:64555734-64555750	2	AT	10	3	11,10,9	9	9	10	10	11	.	ZNF680	ZNF680	0	ZNF680_intron		cg23856267	chr7:64570591	14849	.	.	LOC100128885	CpG:_100_Island		224	-0.128978	0.29016	2.9589e-18	5.78071e-12		0	0	0	0
chr7:64544440-64544471	2	AC	16	6	17,16,15,14,13,11	11	15	16	16	17	.	ZNF680	ZNF680	0	ZNF680_intron		cg23856267	chr7:64570591	26135.5	.	.	LOC100128885	CpG:_100_Island		224	-0.071601	0.2233	7.3376e-14	1.43352e-07		1	-0.3113	2.17278e-05	0.096908
chr7:64179046-64179091	2	CG/AC	23	10	23,22,21,20,19,18,14,13,12,11	11	12	20	22	23	.	.	ZNF735	28112	.		cg04732548	chr7:64140708	-38360.5	.	.	ZNF727	.		243	-0.024689	0.46284	2.2545e-34	4.40455e-28		1	-0.559741	9.8374e-34	0.31331
chr7:64147598-64147676	2	AC/AT	43	10	66,65,64,63,62,61,51,50,44,43	43	43	62	63	66	.	.	ZNF735	59527	.		cg04732548	chr7:64140708	-6929	.	.	ZNF727	.		142	0.012649	0.63507	1.9029e-32	3.71764e-26		1	0.591946	4.47357e-18	0.3504
chr7:64115733-64115751	4	GTTT	5	3	8,7,5	5	5	5	7	8	.	.	ZNF727	30395	.		cg04732548	chr7:64140708	24966	.	.	ZNF727	.		239	0.133348	0.69273	1.1613e-62	2.2688e-56		1	0.645159	2.5674e-51	0.41623
chr7:64062686-64062703	2	AT	10	14	27,26,25,24,23,22,21,20,19,18,17,12,11,10	10	11	22	23	27	.	ZNF727	ZNF727	0	ZNF727_intron		cg08964643	chr7:64100042	37347.5	.	.	ZNF727	CpG:_63_Island		236	-0.008728	0.1689	4.9386e-11	9.64839e-05		1	-0.348626	4.27802e-06	0.12154
chr7:611770-611798	4	ATGG	9	6	13,12,11,10,9,8	8	8	8	9	13	.	PRKAR1B	PRKAR1B	0	PRKAR1B_intron		cg18367631	chr7:613672	1888	.	PRKAR1B	PRKAR1B	.		204	0.124928	0.19785	2.6441e-11	5.1657e-05		1	0.627734	1.04152e-38	0.39405
chr7:611770-611798	4	ATGG	9	6	13,12,11,10,9,8	8	8	8	9	13	.	PRKAR1B	PRKAR1B	0	PRKAR1B_intron		cg24144574	chr7:613808	2024	.	PRKAR1B	PRKAR1B	.		202	0.114811	0.2736	1.3943e-15	2.724e-09		1	0.684631	4.70162e-50	0.46872
chr7:6073966-6073998	5	AAAAC	7	4	9,8,7,6	6	7	7	8	9	.	.	EIF2AK1	14738	.		cg11986820	chr7:6077347	3365	.	.	EIF2AK1	CpG:_59_Shelf_N		245	-0.044044	0.26205	9.1236e-18	1.78245e-11		1	-0.480062	1.08731e-22	0.23046
chr7:588520-588563	3	GGT	16	3	16,15,12	12	12	12	12	16	.	PRKAR1B	PRKAR1B	0	PRKAR1B_intron		cg00107617	chr7:586360	-2181.5	.	PRKAR1B	PRKAR1B	.		212	-0.009323	0.2565	3.2706e-15	6.38967e-09		0	0	0	0
chr7:588520-588563	3	GGT	16	3	16,15,12	12	12	12	12	16	.	PRKAR1B	PRKAR1B	0	PRKAR1B_intron		cg24144574	chr7:613808	25266.5	.	PRKAR1B	PRKAR1B	.		219	0.031206	0.26902	1.7642e-16	3.44666e-10		0	0	0	0
chr7:588520-588563	3	GGT	16	3	16,15,12	12	12	12	12	16	.	PRKAR1B	PRKAR1B	0	PRKAR1B_intron		cg18367631	chr7:613672	25130.5	.	PRKAR1B	PRKAR1B	.		221	0.048946	0.27781	3.3608e-17	6.56589e-11		0	0	0	0
chr7:57822443-57822503	2	GT	31	5	33,32,31,30,28	28	31	32	32	33	.	.	ZNF716	348885	.		cg20181692	chr7:57864368	41895	.	.	ZNF716	CpG:_153_Shelf_N		239	0.022329	0.15136	4.6568e-10	0.000909785		0	0	0	0
chr7:57788375-57788396	2	AC	12	4	14,13,12,10	10	12	12	12	14	.	.	ZNF716	314817	.		cg02327189	chr7:57770298	-18087.5	.	.	ZNF716	.		244	-0.082417	0.22619	3.5586e-15	6.95233e-09		1	-0.40603	7.89971e-14	0.16486
chr7:57770630-57770688	2	GT/CT	31	13	42,40,39,38,37,36,35,33,32,31,30,29,26	26	30	30	31	42	.	.	ZNF716	297072	.		cg02327189	chr7:57770298	-361	.	.	ZNF716	.		244	0.021288	0.20545	9.1515e-14	1.7879e-07		1	0.371618	1.20438e-10	0.1381
chr7:57761678-57761719	2	GT	23	7	24,23,22,21,20,19,17	17	22	22	23	24	.	.	ZNF716	288120	.		cg02327189	chr7:57770298	8599.5	.	.	ZNF716	.		244	-0.060436	0.19135	7.9511e-13	1.55338e-06		1	-0.336898	1.0032e-07	0.1135
chr7:5768347-5768393	2	AC	25	28	47,46,45,44,43,42,41,40,39,38,37,36,35,34,33,32,31,30,29,28,27,26,25,24,23,22,21,19	19	26	30	37	47	.	RNF216	RNF216	0	RNF216_intron		cg05617317	chr7:5774005	5635	.	RNF216	RNF216	.		236	-0.004821	0.20291	3.4097e-13	6.66143e-07		0	0	0	0
chr7:5734826-5734868	4	AAAT	11	9	17,16,15,14,13,12,11,10,9	9	12	12	14	17	.	RNF216	RNF216	0	RNF216_intron		cg05617317	chr7:5774005	39158	.	RNF216	RNF216	.		243	0.017603	0.1694	2.369e-11	4.62824e-05		1	0.440522	2.39984e-17	0.19406
chr7:57337173-57337220	4	ATCC	13	9	19,15,14,13,12,11,10,9,7	7	12	12	13	19	.	.	MIR3147	67804	.		cg24509234	chr7:57321681	-15515.5	.	.	MIR3147	.		244	-0.028867	0.16189	6.537e-11	0.000127711		1	-0.282014	0.000593149	0.079532
chr7:57004086-57004203	3	CCT	39	3	39,37,36	36	37	37	39	39	.	.	MIR4283-1,MIR4283-2	48223	.		cg07352967	chr7:57009034	4889.5	.	.	MIR4283-1,MIR4283-2	CpG:_22_Island		229	0.020525	0.16787	1.1064e-10	0.000216154		0	0	0	0
chr7:57004086-57004203	3	CCT	39	3	39,37,36	36	37	37	39	39	.	.	MIR4283-1,MIR4283-2	48223	.		cg02112038	chr7:57009156	5011.5	.	.	MIR4283-1,MIR4283-2	CpG:_22_Island		229	-0.027785	0.1837	1.1982e-11	2.34089e-05		0	0	0	0
chr7:57004086-57004203	3	CCT	39	3	39,37,36	36	37	37	39	39	.	.	MIR4283-1,MIR4283-2	48223	.		cg21634283	chr7:57003969	-175.5	.	.	MIR4283-1,MIR4283-2	CpG:_35_Shore_N		167	0.201909	0.64409	7.4514e-39	1.45576e-32		0	0	0	0
chr7:57003944-57003963	3	AGC	9	5	13,12,9,8,7	7	9	9	9	13	.	.	MIR4283-1,MIR4283-2	48081	.		cg21634283	chr7:57003969	15.5	.	.	MIR4283-1,MIR4283-2	CpG:_35_Shore_N		132	-0.086995	0.4389	5.0847e-18	9.93383e-12		1	-0.761131	2.12756e-46	0.57932
chr7:56411557-56411583	4	ATTT	7	3	9,8,7	7	7	7	8	9	.	.	LOC650226	12121	.		cg18766483	chr7:56367731	-43839	.	.	LOC650226	CpG:_21_Shore_N		244	-0.059359	0.23844	5.0321e-16	9.83106e-10		1	-0.495207	8.98923e-25	0.24523
chr7:56115626-56115648	2	AT	12	15	28,27,26,24,23,22,21,19,16,15,14,13,12,11,10	10	10	10	12	28	NUPR2	NUPR2	NUPR2	0	NUPR2_intron		cg08370546	chr7:56093077	-22560	PHKG1	.	PHKG1	.		239	-0.005617	0.15127	4.7195e-10	0.000922035		0	0	0	0
chr7:56052779-56052805	5	CTTTT	6	5	8,7,6,5,4	4	4	4	6	8	PSPH	CCT6A	CCT6A	0	CCT6A_intron		cg17603988	chr7:56093073	40281	PHKG1	.	PHKG1	.		241	0.026471	0.16319	7.0936e-11	0.000138586		0	0	0	0
chr7:56052779-56052805	5	CTTTT	6	5	8,7,6,5,4	4	4	4	6	8	PSPH	CCT6A	CCT6A	0	CCT6A_intron		cg08370546	chr7:56093077	40285	PHKG1	.	PHKG1	.		237	0.027268	0.1858	3.8442e-12	7.5103e-06		1	0.286561	0.000748336	0.082117
chr7:56052779-56052805	5	CTTTT	6	5	8,7,6,5,4	4	4	4	6	8	PSPH	CCT6A	CCT6A	0	CCT6A_intron		cg12555334	chr7:56052597	-195	CCT6A,PSPH	CCT6A	CCT6A	CpG:_95_Shore_S		241	-0.056071	0.52477	1.7407e-40	3.40075e-34		1	-0.696477	1.01938e-61	0.48508
chr7:55887601-55887639	3	CGG	13	21	30,27,24,23,22,21,20,19,18,17,16,15,14,13,12,11,10,9,8,7,6	6	9	11	13	30	.	ZNF713	ZNF713	0	ZNF713_5utr		cg01200051	chr7:55886954	-666	ZNF713	.	ZNF713	CpG:_41_Shore_N		244	-0.013721	0.35565	6.8283e-25	1.33402e-18		1	-0.536899	8.73828e-30	0.28826
chr7:55887601-55887639	3	CGG	13	21	30,27,24,23,22,21,20,19,18,17,16,15,14,13,12,11,10,9,8,7,6	6	9	11	13	30	.	ZNF713	ZNF713	0	ZNF713_5utr		cg07109002	chr7:55886962	-658	ZNF713	.	ZNF713	CpG:_41_Shore_N		244	-0.014976	0.42386	8.2763e-31	1.61692e-24		1	-0.431312	3.368e-16	0.18603
chr7:55585198-55585245	2	GT	27	12	30,29,28,27,26,25,24,23,22,19,18,17	17	24	25	26	30	.	.	VOPP1	12697	.		cg05406265	chr7:55553546	-31675.5	VOPP1	VOPP1	VOPP1	.		143	0.005527	0.26325	5.6794e-11	0.000110957		1	0.507464	1.63839e-16	0.25752
chr7:55573865-55573892	2	GT	15	6	18,16,15,14,13,11	11	14	15	15	18	VOPP1	.	VOPP1	1364	.		cg05406265	chr7:55553546	-20332.5	VOPP1	VOPP1	VOPP1	.		244	0.023589	0.2178	1.3352e-14	2.60854e-08		1	0.525814	5.64903e-29	0.27648
chr7:55564225-55564299	2	CT	38	12	50,49,48,47,46,45,44,42,41,40,39,38	38	44	46	46	50	.	VOPP1	VOPP1	0	VOPP1_intron		cg05406265	chr7:55553546	-10716	VOPP1	VOPP1	VOPP1	.		245	0.006629	0.2397	3.5723e-16	6.9791e-10		1	0.502285	6.56531e-24	0.25229
chr7:55553757-55553806	2	AC	25	10	25,24,23,22,21,20,19,18,17,16	16	18	19	21	25	VOPP1	VOPP1	VOPP1	0	VOPP1_intron		cg05406265	chr7:55553546	-235.5	VOPP1	VOPP1	VOPP1	.		244	-0.010198	0.17813	5.8575e-12	1.14436e-05		1	-0.477598	2.94304e-22	0.2281
chr7:5554790-5554828	2	GT	20	12	25,24,23,22,21,20,19,18,17,16,15,14	14	18	19	20	25	.	.	ACTB	24190	.		cg24348891	chr7:5568009	13200	.	.	FSCN1	CpG:_34_Shelf_N		228	0.017431	0.16691	1.3879e-10	0.00027115		1	0.373604	3.15503e-10	0.13958
chr7:55540399-55540445	4	AAAT	12	8	15,14,13,12,11,10,9,7	7	9	9	12	15	VOPP1	VOPP1	VOPP1	0	VOPP1_intron		cg05406265	chr7:55553546	13124	VOPP1	VOPP1	VOPP1	.		244	-0.010343	0.22387	5.1394e-15	1.00407e-08		1	-0.455818	1.8697e-19	0.20777
chr7:55373276-55373308	4	ATTT	8	7	11,10,9,8,7,6,5	5	5	8	8	11	.	LANCL2	LANCL2	0	LANCL2_intron		cg21369466	chr7:55369636	-3656	.	LANCL2	LANCL2	CpG:_146_Shelf_S		245	0.015454	0.26033	1.2144e-17	2.37254e-11		1	0.607635	8.77782e-43	0.36922
chr7:55311205-55311245	6	CCCTCT	8	4	10,9,8,6	6	10	10	10	10	.	.	LANCL2	54203	.		cg00134032	chr7:55304575	-6650	.	.	ELDR	.		244	0.167593	0.69838	6.3314e-65	1.23695e-58		1	0.878038	1.25956e-144	0.77095
chr7:55189418-55189440	4	ATTC	6	3	8,7,6	6	7	7	7	8	EGFR-AS1	EGFR	EGFR	0	EGFR_intron		cg03565206	chr7:55189053	-376	EGFR-AS1	EGFR	EGFR	.		244	0.075704	0.1769	7.0386e-12	1.37511e-05		0	0	0	0
chr7:55189418-55189440	4	ATTC	6	3	8,7,6	6	7	7	7	8	EGFR-AS1	EGFR	EGFR	0	EGFR_intron		cg06669370	chr7:55189074	-355	EGFR-AS1	EGFR	EGFR	.		244	0.097222	0.27129	2.2762e-18	4.44694e-12		1	0.512787	3.46039e-27	0.26295
chr7:55189099-55189152	2	GT/AT	28	5	29,28,27,26,25	25	26	26	26	29	EGFR-AS1	EGFR	EGFR	0	EGFR_intron		cg03565206	chr7:55189053	-72.5	EGFR-AS1	EGFR	EGFR	.		244	-0.039818	0.20089	1.8467e-13	3.60784e-07		0	0	0	0
chr7:55189099-55189152	2	GT/AT	28	5	29,28,27,26,25	25	26	26	26	29	EGFR-AS1	EGFR	EGFR	0	EGFR_intron		cg06669370	chr7:55189074	-51.5	EGFR-AS1	EGFR	EGFR	.		244	-0.050027	0.29487	4.087e-20	7.98465e-14		1	-0.53066	5.32663e-30	0.2816
chr7:55061613-55061673	2	GT/AG	31	12	39,38,37,36,35,34,33,32,31,30,29,28	28	33	34	35	39	.	EGFR	EGFR	0	EGFR_intron		cg21901928	chr7:55072154	10511	.	EGFR	EGFR	.		227	-0.028304	0.26455	9.9056e-17	1.93523e-10		1	-0.450333	1.04313e-18	0.2028
chr7:54865351-54865379	4	ATTT	7	5	12,10,9,8,7	7	7	7	7	12	.	.	LOC100996654	60389	.		cg13274692	chr7:54864960	-405	.	.	LOC100996654	.		245	0.050334	0.2095	4.3293e-14	8.45802e-08		1	0.333287	1.26463e-07	0.11108
chr7:54865351-54865379	4	ATTT	7	5	12,10,9,8,7	7	7	7	7	12	.	.	LOC100996654	60389	.		cg25246421	chr7:54864978	-387	.	.	LOC100996654	.		245	0.066065	0.23723	5.3285e-16	1.04101e-09		1	0.435098	2.67858e-17	0.18931
chr7:54695393-54695420	2	AT	14	11	19,18,17,16,15,14,13,12,11,9,8	8	8	8	14	19	.	.	SEC61G	56827	.		cg03799713	chr7:54696426	1019.5	.	.	SEC61G	CpG:_24_Shore_N		245	0.009438	0.21395	2.1605e-14	4.2209e-08		1	0.399425	2.29375e-13	0.15954
chr7:5455752-5455787	2	AC	20	4	21,20,19,18	18	20	20	20	21	.	FBXL18	FBXL18	0	FBXL18_intron		cg00422418	chr7:5455606	-163.5	.	.	FBXL18	.		220	0.049867	0.34804	5.0993e-22	9.96235e-16		1	0.692698	6.91021e-48	0.47983
chr7:5236223-5236262	2	GT	20	6	21,20,19,18,17,13	13	13	20	20	21	.	.	WIPI2	2369	.		cg06595212	chr7:5253702	17459.5	.	.	WIPI2	.		245	0.006142	0.18648	1.4976e-12	2.92582e-06		0	0	0	0
chr7:5236223-5236262	2	GT	20	6	21,20,19,18,17,13	13	13	20	20	21	.	.	WIPI2	2369	.		cg16451475	chr7:5253489	17246.5	.	.	WIPI2	.		245	0.008324	0.27276	1.5126e-18	2.95512e-12		1	0.408289	1.5524e-13	0.1667
chr7:5128893-5128945	2	AT	27	13	32,31,30,29,28,27,26,25,24,23,22,21,20	20	23	27	29	32	.	ZNF890P	ZNF890P	0	ZNF890P_intron		cg22618042	chr7:5131232	2313	.	ZNF890P	ZNF890P	.		194	0.005484	0.22282	3.7027e-12	7.23385e-06		1	0.571717	9.4784e-22	0.32686
chr7:51156699-51156742	2	AC	25	11	28,27,26,25,24,23,22,21,20,14,13	13	13	23	25	28	.	COBL	COBL	0	COBL_intron		cg20092399	chr7:51124645	-32075.5	.	COBL	COBL	.		244	-0.00859	0.18693	1.5552e-12	3.03835e-06		1	-0.488395	4.48943e-23	0.23853
chr7:51108918-51108957	2	AC	23	18	35,32,31,30,29,28,27,26,25,24,23,22,21,20,19,18,15,14	14	14	18	27	35	.	COBL	COBL	0	COBL_intron		cg17727071	chr7:51102376	-6561.5	.	COBL	COBL	.		198	0.013344	0.58681	1.7885e-39	3.49414e-33		1	0.696118	1.03138e-56	0.48458
chr7:51070393-51070425	2	AC	17	16	33,32,31,30,29,28,27,26,25,24,23,22,21,19,18,17	17	17	22	28	33	.	COBL	COBL	0	COBL_intron		cg17727071	chr7:51102376	31967	.	COBL	COBL	.		245	0.009905	0.27532	9.8211e-19	1.91872e-12		1	0.459859	2.03517e-19	0.21147
chr7:50749108-50749147	5	GTTTT	8	3	10,9,8	8	8	10	10	10	.	GRB10	GRB10	0	GRB10_intron		cg02093266	chr7:50740139	-8988.5	.	GRB10	GRB10	.		241	-0.042055	0.19966	3.1378e-13	6.13023e-07		1	-0.379486	0.000996776	0.14401
chr7:50742256-50742320	2	CG/AC	33	16	37,36,35,34,33,32,31,30,29,28,27,26,25,21,20,18	18	20	20	27	37	.	GRB10	GRB10	0	GRB10_intron		cg02093266	chr7:50740139	-2149	.	GRB10	GRB10	.		245	0.009678	0.33943	1.1479e-23	2.24262e-17		1	0.521498	6.10139e-27	0.27196
chr7:50717451-50717467	2	GT	9	4	11,10,9,8	8	8	8	8	11	.	GRB10	GRB10	0	GRB10_intron		cg02093266	chr7:50740139	22680	.	GRB10	GRB10	.		245	0.083824	0.2503	6.3602e-17	1.24257e-10		1	0.400562	1.48154e-13	0.16045
chr7:50642279-50642326	2	AC	24	4	26,25,24,23	23	24	24	25	26	.	GRB10	GRB10	0	GRB10_intron		cg07553378	chr7:50658889	16586.5	.	GRB10	GRB10	.		244	0.054083	0.18562	1.8957e-12	3.70357e-06		1	0.451088	6.0415e-19	0.20348
chr7:50642279-50642326	2	AC	24	4	26,25,24,23	23	24	24	25	26	.	GRB10	GRB10	0	GRB10_intron		cg08586669	chr7:50660064	17761.5	.	GRB10	GRB10	.		242	0.072519	0.27116	3.2063e-18	6.26405e-12		1	0.440023	1.14249e-17	0.19362
chr7:50642279-50642326	2	AC	24	4	26,25,24,23	23	24	24	25	26	.	GRB10	GRB10	0	GRB10_intron		cg03466198	chr7:50660235	17932.5	.	GRB10	GRB10	.		243	0.054166	0.28936	1.2573e-19	2.45635e-13		1	0.560955	1.63125e-34	0.31467
chr7:50109363-50109395	4	ATTT	8	4	9,8,7,6	6	6	6	6	9	.	SPATA48	SPATA48	0	SPATA48_intron		cg27183007	chr7:50093379	-16000	ZPBP	.	ZPBP	CpG:_34_Shore_S		244	-0.029179	0.23489	8.9e-16	1.73877e-09		1	-0.498809	3.82624e-25	0.24881
chr7:50103053-50103079	2	AT	14	5	18,17,16,15,14	14	16	16	16	18	.	SPATA48	SPATA48	0	SPATA48_intron		cg27183007	chr7:50093379	-9687	ZPBP	.	ZPBP	CpG:_34_Shore_S		244	0.028055	0.23319	1.1683e-15	2.28247e-09		1	0.497665	3.57158e-25	0.24767
chr7:50100813-50100845	4	AAAT	10	8	17,16,15,14,13,12,11,9	9	13	14	15	17	.	SPATA48	SPATA48	0	SPATA48_intron		cg27183007	chr7:50093379	-7450	ZPBP	.	ZPBP	CpG:_34_Shore_S		243	0.009157	0.18264	3.2938e-12	6.435e-06		1	0.443734	8.37772e-18	0.1969
chr7:50090476-50090532	2	GT/AT	30	3	30,28,18	18	28	28	28	30	.	ZPBP	ZPBP	0	ZPBP_intron		cg27183007	chr7:50093379	2875	ZPBP	.	ZPBP	CpG:_34_Shore_S		243	-0.023755	0.20731	7.7208e-14	1.50839e-07		1	-0.483384	3.05794e-23	0.23366
chr7:49672996-49673064	6	AAAAAG	12	4	13,12,11,9	9	12	12	13	13	.	.	VWC2	100574	.		cg14927641	chr7:49638411	-34619	.	.	VWC2	.		233	-0.082111	0.19974	7.6791e-13	1.50024e-06		1	-0.4032	3.56101e-09	0.16257
chr7:48915620-48915652	2	GT	17	6	23,22,21,20,19,17	17	17	20	21	23	.	.	CDC14C	8895	.		cg04527202	chr7:48923847	8211	CDC14C	.	CDC14C	CpG:_49_Shore_N		232	-0.008542	0.15501	5.0579e-10	0.000988147		1	-0.383784	2.6733e-11	0.14729
chr7:4831874-4831906	5	AAAAC	7	3	8,7,6	6	7	7	7	8	.	RADIL	RADIL	0	RADIL_intron		cg18467790	chr7:4832248	358	.	RADIL	RADIL	CpG:_75_Shelf_N		244	-0.538898	0.27472	1.2782e-18	2.49718e-12		1	-0.570622	1.07995e-36	0.32561
chr7:48115345-48115412	2	GT	36	5	40,39,38,37,36	36	36	38	38	40	.	.	UPP1	6610	.		cg09585466	chr7:48087602	-27776.5	UPP1	.	UPP1	CpG:_104_Shore_N,CpG:_31_Shore_N		244	0.087153	0.16793	2.6776e-11	5.23115e-05		1	0.332911	2.31861e-07	0.11083
chr7:4809658-4809700	4	ATTT	11	4	13,12,11,10	10	11	11	11	13	.	RADIL	RADIL	0	RADIL_intron		cg02779037	chr7:4809052	-627	.	RADIL	RADIL	CpG:_68_Island		243	0.098189	0.15586	1.7283e-10	0.000337653		1	0.427387	1.56334e-16	0.18266
chr7:4809658-4809700	4	ATTT	11	4	13,12,11,10	10	11	11	11	13	.	RADIL	RADIL	0	RADIL_intron		cg07048244	chr7:4838091	28412	.	RADIL	RADIL	CpG:_22_Shore_S		245	-0.051688	0.15949	8.52e-11	0.000166453		0	0	0	0
chr7:4809658-4809700	4	ATTT	11	4	13,12,11,10	10	11	11	11	13	.	RADIL	RADIL	0	RADIL_intron		cg26331880	chr7:4805994	-3685	.	RADIL	RADIL	CpG:_68_Shelf_N		245	0.074717	0.16679	2.89e-11	5.64611e-05		1	0.541544	8.67643e-32	0.29327
chr7:4809658-4809700	4	ATTT	11	4	13,12,11,10	10	11	11	11	13	.	RADIL	RADIL	0	RADIL_intron		cg21932542	chr7:4810714	1035	.	RADIL	RADIL	CpG:_68_Shore_S		245	0.070882	0.2022	1.3471e-13	2.63179e-07		1	0.300772	3.03895e-05	0.090464
chr7:4809658-4809700	4	ATTT	11	4	13,12,11,10	10	11	11	11	13	.	RADIL	RADIL	0	RADIL_intron		cg05867499	chr7:4809183	-496	.	RADIL	RADIL	CpG:_68_Island		244	0.154307	0.23031	1.8484e-15	3.61116e-09		1	0.517127	5.88138e-28	0.26742
chr7:4809658-4809700	4	ATTT	11	4	13,12,11,10	10	11	11	11	13	.	RADIL	RADIL	0	RADIL_intron		cg01847021	chr7:4837964	28285	.	RADIL	RADIL	CpG:_22_Shore_S		243	-0.091382	0.27036	3.1243e-18	6.10385e-12		1	-0.389191	1.37163e-12	0.15147
chr7:4809658-4809700	4	ATTT	11	4	13,12,11,10	10	11	11	11	13	.	RADIL	RADIL	0	RADIL_intron		cg08799816	chr7:4814495	4816	.	RADIL	RADIL	CpG:_20_Shore_N		242	0.211903	0.29925	2.7345e-20	5.34231e-14		1	0.515975	1.62211e-27	0.26623
chr7:4809658-4809700	4	ATTT	11	4	13,12,11,10	10	11	11	11	13	.	RADIL	RADIL	0	RADIL_intron		cg03697173	chr7:4837802	28123	.	RADIL	RADIL	CpG:_22_Shore_S		244	-0.101086	0.31084	2.4904e-21	4.86542e-15		1	-0.439841	8.65666e-18	0.19346
chr7:4809658-4809700	4	ATTT	11	4	13,12,11,10	10	11	11	11	13	.	RADIL	RADIL	0	RADIL_intron		cg11526630	chr7:4805936	-3743	.	RADIL	RADIL	CpG:_68_Shelf_N		205	0.197397	0.42894	1.7054e-26	3.33179e-20		1	0.688164	1.21499e-53	0.47357
chr7:48062481-48062515	4	AAAT	9	6	13,12,11,10,9,8	8	9	9	11	13	.	.	C7orf57	1185	.		cg26173946	chr7:48087046	24548	UPP1	.	UPP1	CpG:_31_Shore_N		243	0.010517	0.24938	9.8843e-17	1.93107e-10		1	0.521555	3.95876e-28	0.27202
chr7:48062481-48062515	4	AAAT	9	6	13,12,11,10,9,8	8	9	9	11	13	.	.	C7orf57	1185	.		cg02008113	chr7:48087654	25156	UPP1	.	UPP1	CpG:_104_Shore_N,CpG:_31_Shore_N		245	0.012463	0.342	7.1238e-24	1.39176e-17		1	0.50066	1.82965e-25	0.25066
chr7:48062481-48062515	4	AAAT	9	6	13,12,11,10,9,8	8	9	9	11	13	.	.	C7orf57	1185	.		cg25097266	chr7:48087535	25037	UPP1	.	UPP1	CpG:_104_Shore_N,CpG:_31_Shore_N		245	0.064766	0.55611	9.5261e-45	1.86109e-38		1	0.784653	8.06962e-95	0.61568
chr7:48062481-48062515	4	AAAT	9	6	13,12,11,10,9,8	8	9	9	11	13	.	.	C7orf57	1185	.		cg09585466	chr7:48087602	25104	UPP1	.	UPP1	CpG:_104_Shore_N,CpG:_31_Shore_N		245	0.116685	0.65498	4.4457e-58	8.68543e-52		1	0.837896	3.20612e-121	0.70207
chr7:47991597-47991624	5	AAAAC	7	3	7,6,5	5	6	7	7	7	.	SUN3	SUN3	0	SUN3_intron		cg05501177	chr7:48034374	42763.5	C7orf57	.	C7orf57	CpG:_104_Shore_N		244	0.029276	0.18792	1.3382e-12	2.6144e-06		1	0.445836	1.76747e-18	0.19877
chr7:47958781-47958845	6	CCCTCT	11	5	13,11,10,8,7	7	11	11	11	13	.	.	HUS1	4443	.		cg07721756	chr7:47979822	21009	HUS1	.	HUS1	CpG:_33_Shore_S		243	0.144786	0.22709	3.5169e-15	6.87086e-09		1	0.507957	2.31959e-26	0.25802
chr7:47640919-47640995	2	GT/AG/GT	39	18	47,46,45,44,43,42,41,40,39,38,37,36,35,34,33,32,31,29	29	33	38	41	47	.	.	LINC01447	11027	.		cg07325438	chr7:47635469	-5488	.	.	LINC01447	.		244	-0.007714	0.1807	3.9786e-12	7.77287e-06		1	-0.372532	1.82999e-10	0.13878
chr7:47640919-47640995	2	GT/AG/GT	39	18	47,46,45,44,43,42,41,40,39,38,37,36,35,34,33,32,31,29	29	33	38	41	47	.	.	LINC01447	11027	.		cg01864991	chr7:47634971	-5986	.	.	LINC01447	.		244	-0.013448	0.23693	6.4147e-16	1.25322e-09		1	-0.432504	2.78468e-16	0.18706
chr7:47640919-47640995	2	GT/AG/GT	39	18	47,46,45,44,43,42,41,40,39,38,37,36,35,34,33,32,31,29	29	33	38	41	47	.	.	LINC01447	11027	.		cg04896115	chr7:47635307	-5650	.	.	LINC01447	.		241	-0.015932	0.32389	4.3728e-22	8.54301e-16		1	-0.478038	1.41324e-21	0.22852
chr7:47612328-47612407	3	AAT/AAG	27	15	36,35,34,33,32,31,30,29,28,27,26,25,24,23,22	22	25	26	30	36	.	.	LINC01447	9532	.		cg04896115	chr7:47635307	22939.5	.	.	LINC01447	.		241	0.014314	0.16308	7.214e-11	0.000140938		0	0	0	0
chr7:47612328-47612407	3	AAT/AAG	27	15	36,35,34,33,32,31,30,29,28,27,26,25,24,23,22	22	25	26	30	36	.	.	LINC01447	9532	.		cg06348073	chr7:47614666	2298.5	.	.	LINC01447	.		241	0.009071	0.31158	3.8477e-21	7.51714e-15		1	0.43299	3.04678e-16	0.18748
chr7:47592561-47592595	6	GTTTTT	6	4	7,6,5,4	4	5	6	6	7	.	.	TNS3	10451	.		cg02966404	chr7:47591727	-851	.	.	TNS3	.		240	-0.026807	0.17681	1.0609e-11	2.07265e-05		0	0	0	0
chr7:47574627-47574660	2	AC	17	6	21,20,19,18,17,16	16	17	19	19	21	.	TNS3	TNS3	0	TNS3_intron		cg08348818	chr7:47568625	-6018.5	.	TNS3	TNS3	.		245	-0.015169	0.19586	3.5772e-13	6.98867e-07		1	-0.339735	5.26556e-08	0.11542
chr7:4745456-4745489	2	GT	17	4	20,19,18,17	17	17	18	18	20	.	FOXK1	FOXK1	0	FOXK1_intron		cg26800803	chr7:4725464	-20008.5	.	FOXK1	FOXK1	CpG:_42_Island		243	-0.038027	0.15554	1.8112e-10	0.000353849		0	0	0	0
chr7:4745456-4745489	2	GT	17	4	20,19,18,17	17	17	18	18	20	.	FOXK1	FOXK1	0	FOXK1_intron		cg15176413	chr7:4724812	-20660.5	.	FOXK1	FOXK1	CpG:_42_Shore_N		242	-0.068464	0.15703	1.5902e-10	0.000310673		0	0	0	0
chr7:47124549-47124582	2	AC	19	6	26,21,20,19,18,17	17	18	19	20	26	.	.	TNS3	150572	.		cg14680128	chr7:47145418	20852.5	.	.	TNS3	.		245	0.054122	0.17566	7.6846e-12	1.50132e-05		1	0.4313	6.39677e-17	0.18602
chr7:4625257-4625296	4	ATTT	11	6	14,13,12,11,10,9	9	11	12	12	14	.	.	FOXK1	56999	.		cg04791145	chr7:4625855	578.5	.	.	FOXK1	.		244	0.028421	0.30134	1.3252e-20	2.589e-14		1	0.417959	2.66743e-15	0.17469
chr7:4623310-4623335	6	CCCTCT	4	4	6,5,4,3	3	4	4	5	6	.	.	FOXK1	58960	.		cg04791145	chr7:4625855	2532.5	.	.	FOXK1	.		241	-0.088793	0.46925	9.9818e-35	1.95011e-28		1	-0.596741	1.94007e-41	0.3561
chr7:4620871-4620918	4	ATTT	12	7	15,14,13,12,11,10,9	9	12	12	13	15	.	.	FOXK1	61377	.		cg04791145	chr7:4625855	4960.5	.	.	FOXK1	.		244	-0.038683	0.21889	1.1259e-14	2.19964e-08		1	-0.410634	1.69766e-14	0.16862
chr7:4618828-4618855	2	AC	14	10	23,22,21,20,19,18,17,16,15,14	14	15	15	16.75	23	.	.	FOXK1	63440	.		cg04791145	chr7:4625855	7013.5	.	.	FOXK1	.		234	-0.018129	0.45141	4.3807e-32	8.55844e-26		1	-0.582641	7.16468e-38	0.33947
chr7:45798346-45798379	5	AAAAT	7	3	8,7,6	6	7	7	7	8	.	.	LOC730234	6850	.		cg21589460	chr7:45810882	12519.5	.	.	SEPT7P2	.		241	0.057037	0.25856	2.9863e-17	5.83424e-11		1	0.339323	3.67943e-08	0.11514
chr7:45788358-45788395	2	GT	22	13	35,31,28,27,26,25,24,23,22,21,20,19,17	17	22	22	24	35	.	.	LOC730234	16834	.		cg21589460	chr7:45810882	22505.5	.	.	SEPT7P2	.		241	-0.00462	0.21555	2.753e-14	5.37845e-08		0	0	0	0
chr7:45215987-45216052	2	AG/AG	37	4	38,37,36,34	34	37	37	38	38	.	.	RAMP3	31738	.		cg20390245	chr7:45216125	105.5	.	.	RAMP3	.		241	0.072364	0.18224	4.2953e-12	8.3916e-06		1	0.43901	2.89058e-14	0.19273
chr7:45186004-45186082	2	GT	40	3	40,36,32	32	36	40	40	40	.	.	RAMP3	1755	.		cg10585226	chr7:45152984	-33059	.	.	RAMP3	.		245	-0.014045	0.15066	3.1143e-10	0.000608431		1	-0.491019	4.41465e-24	0.2411
chr7:45155477-45155517	4	AAAT	10	5	13,12,11,10,9	9	10	11	11	13	.	.	RAMP3	2274	.		cg10585226	chr7:45152984	-2513	.	.	RAMP3	.		245	-0.056795	0.18563	1.704e-12	3.32905e-06		1	-0.488139	1.23161e-23	0.23828
chr7:44914980-44915029	5	AAAAT	11	8	18,17,16,15,14,13,12,11	11	11	11	15	18	.	.	PURB	29451	.		cg00827748	chr7:44915175	170.5	.	.	PURB	.		226	-0.018283	0.41637	5.2624e-28	1.0281e-21		1	-0.564996	4.12945e-34	0.31922
chr7:44840003-44840044	4	AAAT	11	7	14,12,11,10,9,8,7	7	9	11	11	14	.	H2AFV	H2AFV	0	H2AFV_intron		cg20760846	chr7:44849407	9383.5	H2AFV	.	H2AFV	CpG:_63_Shore_S		245	0.03017	0.22704	2.7297e-15	5.33293e-09		1	0.464252	1.40299e-20	0.21553
chr7:44510218-44510264	2	GT	25	8	26,25,24,23,22,21,20,19	19	23	24	24	26	.	.	NPC1L1	2272	.		cg05539991	chr7:44515581	5340	.	NPC1L1	NPC1L1	.		245	-0.017085	0.21097	3.4451e-14	6.73059e-08		1	-0.521047	4.69183e-28	0.27149
chr7:44495083-44495214	3	AAT	45	3	45,44,43	43	45	45	45	45	.	.	NUDCD3	4426	.		cg05539991	chr7:44515581	20432.5	.	NPC1L1	NPC1L1	.		245	-0.071227	0.27424	1.1778e-18	2.30103e-12		1	-0.468519	6.04443e-21	0.21951
chr7:44171423-44171449	4	AAAT	7	5	10,9,8,7,6	6	7	7	8	10	.	GCK	GCK	0	GCK_intron		cg22208713	chr7:44154867	-16569	.	GCK	GCK	.		207	-0.07737	0.18321	1.2484e-10	0.000243896		1	-0.553868	3.65007e-27	0.30677
chr7:44094834-44094863	2	AG	17	14	32,31,30,29,28,27,26,25,24,23,22,21,18,17	17	17	25	26	32	.	.	AEBP1	9482	.		cg00411107	chr7:44099804	4955.5	.	.	AEBP1	.		244	-0.012738	0.28743	1.4718e-19	2.87541e-13		1	-0.581335	6.85599e-30	0.33795
chr7:4403357-4403474	2	AG	59	5	60,59,57,56,55	55	56	59	59	60	.	.	SDK1	134358	.		cg10619895	chr7:4416571	13155.5	.	.	SDK1	.		245	-0.015016	0.22163	6.4444e-15	1.25902e-08		1	-0.282057	0.000863728	0.079556
chr7:44020722-44020751	2	CT	18	3	18,17,15	15	18	18	18	18	POLR2J4	.	POLR2J4	1529	.		cg22785672	chr7:44044051	23314.5	DBNL	LINC00957	LINC00957	CpG:_59_Shore_N		244	0.048218	0.1553	1.7201e-10	0.000336051		1	0.562406	6.31417e-35	0.3163
chr7:43897204-43897230	4	AAAT	7	4	10,9,8,7	7	7	7	7	10	.	URGCP,URGCP-MRPS24	URGCP-MRPS24,URGCP	0	URGCP-MRPS24_intron,URGCP_intron		cg27549208	chr7:43925852	28635	UBE2D4,URGCP	URGCP	URGCP	CpG:_64_Shore_N		242	-0.06395	0.18327	3.3243e-12	6.49459e-06		1	-0.339897	4.23457e-08	0.11553
chr7:43803280-43803328	2	AT/GT	25	4	27,26,25,21	21	26	26	26	27	.	BLVRA	BLVRA	0	BLVRA_intron		cg10045861	chr7:43782087	-21217	.	BLVRA	BLVRA	.		244	-0.132116	0.35909	3.5609e-25	6.95682e-19		1	-0.813855	5.19822e-108	0.66236
chr7:43803280-43803328	2	AT/GT	25	4	27,26,25,21	21	26	26	26	27	.	BLVRA	BLVRA	0	BLVRA_intron		cg12894711	chr7:43782350	-20954	.	BLVRA	BLVRA	.		245	-0.296365	0.51984	1.3741e-40	2.68454e-34		1	-0.90233	3.67767e-170	0.8142
chr7:43789877-43789904	2	GT	14	6	18,17,16,15,14,13	13	13	14	16	18	.	BLVRA	BLVRA	0	BLVRA_intron		cg04391064	chr7:43758240	-31650.5	BLVRA	.	BLVRA	CpG:_90_Island		244	0.023504	0.14903	4.297e-10	0.000839492		1	0.541184	1.40365e-31	0.29288
chr7:43738376-43738420	2	GT	23	11	25,24,23,22,21,20,19,18,17,16,13	13	18	18	18	25	.	.	COA1	8836	.		cg10045861	chr7:43782087	43689	.	BLVRA	BLVRA	.		243	0.03248	0.4997	4.138e-38	8.08429e-32		1	0.787718	1.04906e-95	0.6205
chr7:43738376-43738420	2	GT	23	11	25,24,23,22,21,20,19,18,17,16,13	13	18	18	18	25	.	.	COA1	8836	.		cg12894711	chr7:43782350	43952	.	BLVRA	BLVRA	.		244	0.072299	0.71336	1.3197e-67	2.57826e-61		1	0.880318	5.57327e-150	0.77496
chr7:43262226-43262265	2	AT/GT	20	7	26,25,24,23,21,20,17	17	20	20	25	26	.	HECW1	HECW1	0	HECW1_intron		cg02964324	chr7:43251719	-10526.5	.	HECW1	HECW1	CpG:_24_Shelf_S		245	0.100502	0.57289	8.6806e-47	1.6959e-40		1	0.821626	1.80113e-112	0.67507
chr7:43250119-43250161	2	AC	22	3	22,20,15	15	15	22	22	22	.	HECW1	HECW1	0	HECW1_intron		cg05606455	chr7:43249158	-982	.	HECW1	HECW1	CpG:_24_Island		200	0.009137	0.21432	5.1225e-12	1.00077e-05		1	0.376882	4.99837e-09	0.14204
chr7:43250119-43250161	2	AC	22	3	22,20,15	15	15	22	22	22	.	HECW1	HECW1	0	HECW1_intron		cg02964324	chr7:43251719	1579	.	HECW1	HECW1	CpG:_24_Shelf_S		200	-0.08902	0.77147	2.2095e-65	4.31663e-59		1	-0.925019	1.03847e-167	0.85566
chr7:43248671-43248745	3	CCT	25	4	25,24,23,22	22	24	24	24	25	.	HECW1	HECW1	0	HECW1_intron		cg01378182	chr7:43249036	328	.	HECW1	HECW1	CpG:_24_Island		234	0.037668	0.16268	1.4437e-10	0.000282051		1	0.317474	0.000904619	0.10079
chr7:43248671-43248745	3	CCT	25	4	25,24,23,22	22	24	24	24	25	.	HECW1	HECW1	0	HECW1_intron		cg05606455	chr7:43249158	450	.	HECW1	HECW1	CpG:_24_Island		233	0.044042	0.18515	6.42e-12	1.25426e-05		1	0.423604	4.4495e-11	0.17944
chr7:42546543-42546566	2	AG	15	5	17,16,15,14,12	12	15	15	15	17	.	.	LINC01448	115161	.		cg16632785	chr7:42522383	-24171.5	.	.	LINC01448	.		229	-0.044285	0.16919	9.2069e-11	0.000179872		0	0	0	0
chr7:42524253-42524284	4	ATTT	9	7	15,14,13,12,11,10,9	9	9	9	10	15	.	.	LINC01448	137443	.		cg03704308	chr7:42493815	-30453.5	.	.	LINC01448	CpG:_19_Shore_S		245	0.014125	0.16915	2.0338e-11	3.97337e-05		0	0	0	0
chr7:42517448-42517508	2	GT/AG	31	3	32,31,30	30	31	31	31	32	.	.	LINC01448	144219	.		cg16632785	chr7:42522383	4905	.	.	LINC01448	.		235	-0.138953	0.16834	5.8802e-11	0.00011488		0	0	0	0
chr7:42517448-42517508	2	GT/AG	31	3	32,31,30	30	31	31	31	32	.	.	LINC01448	144219	.		cg15247806	chr7:42537259	19781	.	.	LINC01448	.		245	0.085838	0.16659	2.9789e-11	5.81979e-05		0	0	0	0
chr7:42517448-42517508	2	GT/AG	31	3	32,31,30	30	31	31	31	32	.	.	LINC01448	144219	.		cg22997617	chr7:42493402	-24076	.	.	LINC01448	CpG:_19_Shore_N		241	-0.095943	0.18181	4.5758e-12	8.9396e-06		0	0	0	0
chr7:42517448-42517508	2	GT/AG	31	3	32,31,30	30	31	31	31	32	.	.	LINC01448	144219	.		cg03704308	chr7:42493815	-23663	.	.	LINC01448	CpG:_19_Shore_S		245	-0.071445	0.30063	1.2528e-20	2.44756e-14		0	0	0	0
chr7:42490462-42490481	2	AT	10	10	19,17,16,15,14,13,12,11,10,6	6	10	11	12	19	.	.	LINC01448	171246	.		cg22997617	chr7:42493402	2930.5	.	.	LINC01448	CpG:_19_Shore_N		241	-0.013629	0.23833	7.7475e-16	1.51361e-09		0	0	0	0
chr7:42490462-42490481	2	AT	10	10	19,17,16,15,14,13,12,11,10,6	6	10	11	12	19	.	.	LINC01448	171246	.		cg03704308	chr7:42493815	3343.5	.	.	LINC01448	CpG:_19_Shore_S		245	-0.008227	0.25861	1.6142e-17	3.15361e-11		0	0	0	0
chr7:40500854-40500922	2	AC	35	3	36,35,32	32	35	35	35	36	.	SUGCT	SUGCT	0	SUGCT_intron		cg10515180	chr7:40544340	43452	.	SUGCT	SUGCT	.		244	0.012479	0.15569	1.6256e-10	0.000317589		1	0.318967	1.28889e-06	0.10174
chr7:40358718-40358754	3	AAC	12	7	17,16,15,14,13,12,11	11	12	14	14	17	.	SUGCT	SUGCT	0	SUGCT_intron		cg16232391	chr7:40329429	-29307	.	SUGCT	SUGCT	.		244	0.021364	0.38618	1.8464e-27	3.60726e-21		0	0	0	0
chr7:40324233-40324255	4	AAAT	7	9	14,13,12,11,10,9,8,7,4	4	7	11	12	14	.	SUGCT	SUGCT	0	SUGCT_intron		cg16232391	chr7:40329429	5185	.	SUGCT	SUGCT	.		238	0.010091	0.34736	1.1818e-23	2.30885e-17		0	0	0	0
chr7:40322965-40322995	5	AAAAT	6	6	12,11,10,9,8,6	6	6	10	10	12	.	SUGCT	SUGCT	0	SUGCT_intron		cg16232391	chr7:40329429	6449	.	SUGCT	SUGCT	.		244	0.010627	0.27876	6.4607e-19	1.26221e-12		0	0	0	0
chr7:40003154-40003226	2	AC/CT	38	19	46,43,42,41,40,39,38,37,36,35,34,33,32,31,30,29,28,27,24	24	31	36	39	46	.	CDK13	CDK13	0	CDK13_intron		cg13264672	chr7:39953841	-49349	.	CDK13	CDK13	CpG:_255_Shore_S		242	0.037709	0.56795	1.2485e-45	2.43916e-39		1	0.780551	3.8049e-86	0.60926
chr7:39992164-39992201	2	GT	20	13	27,25,24,23,22,21,20,19,18,17,16,15,14	14	15	20.5	22	27	.	CDK13	CDK13	0	CDK13_intron		cg13264672	chr7:39953841	-38341.5	.	CDK13	CDK13	CpG:_255_Shore_S		241	-0.02635	0.24242	4.0359e-16	7.88482e-10		1	-0.555248	4.48551e-33	0.3083
chr7:39992071-39992128	2	AC	31	16	37,36,35,34,33,32,31,30,29,28,27,26,25,24,23,22	22	23	23	27	37	.	CDK13	CDK13	0	CDK13_intron		cg13264672	chr7:39953841	-38258.5	.	CDK13	CDK13	CpG:_255_Shore_S		239	0.032772	0.31902	1.5318e-21	2.99263e-15		1	0.602221	6.41361e-42	0.36267
chr7:39991485-39991524	2	GT	20	9	23,22,21,20,19,18,17,16,15	15	18	19	20	23	.	CDK13	CDK13	0	CDK13_intron		cg13264672	chr7:39953841	-37663.5	.	CDK13	CDK13	CpG:_255_Shore_S		242	-0.083095	0.23031	2.4105e-15	4.70932e-09		1	-0.52683	5.49615e-29	0.27755
chr7:39957091-39957132	2	GT	21	12	27,26,25,24,23,22,21,20,19,18,16,14	14	20	21	22	27	.	CDK13	CDK13	0	CDK13_intron		cg13264672	chr7:39953841	-3270.5	.	CDK13	CDK13	CpG:_255_Shore_S		242	0.056559	0.18619	2.1472e-12	4.19492e-06		1	0.496306	5.50339e-25	0.24632
chr7:39938986-39939023	4	AAAT	10	4	11,10,9,7	7	9	10	11	11	.	.	LOC112267983	8498	.		cg13264672	chr7:39953841	14836.5	.	CDK13	CDK13	CpG:_255_Shore_S		242	-0.144322	0.38807	2.0812e-27	4.06598e-21		1	-0.63616	2.10838e-49	0.4047
chr7:39876386-39876415	3	GTT	10	4	11,10,9,8	8	9	9	10	11	.	.	LOC112267983	71106	.		cg17597901	chr7:39834483	-41917.5	.	.	LINC00265	CpG:_36_Shore_S		245	-0.082421	0.17668	6.5851e-12	1.28651e-05		1	-0.432932	4.68224e-17	0.18743
chr7:39833214-39833235	3	CGG	9	3	9,8,7	7	9	9	9	9	.	.	LINC00265	38592	.		cg17597901	chr7:39834483	1258.5	.	.	LINC00265	CpG:_36_Shore_S		244	0.06319	0.24776	1.1135e-16	2.17541e-10		1	0.429034	1.55356e-16	0.18407
chr7:39130148-39130181	2	GT	17	7	20,18,17,16,15,14,12	12	14	16	17	20	.	POU6F2	POU6F2	0	POU6F2_intron		cg10621924	chr7:39131470	1305.5	.	POU6F2	POU6F2	.		202	-0.040498	0.21724	2.7389e-12	5.35091e-06		1	-0.562628	8.10563e-24	0.31655
chr7:39130148-39130181	2	GT	17	7	20,18,17,16,15,14,12	12	14	16	17	20	.	POU6F2	POU6F2	0	POU6F2_intron		cg15212455	chr7:39130939	774.5	.	POU6F2	POU6F2	.		202	-0.063758	0.25784	1.227e-14	2.39715e-08		1	-0.633056	2.06982e-33	0.40076
chr7:39130148-39130181	2	GT	17	7	20,18,17,16,15,14,12	12	14	16	17	20	.	POU6F2	POU6F2	0	POU6F2_intron		cg20302533	chr7:39131163	998.5	.	POU6F2	POU6F2	.		202	-0.066305	0.39603	1.1229e-23	2.19378e-17		1	-0.71968	7.56831e-50	0.51794
chr7:39129617-39129669	4	AGAT	13	6	15,14,13,12,11,10	10	12	13	13	15	.	POU6F2	POU6F2	0	POU6F2_intron		cg15212455	chr7:39130939	1296	.	POU6F2	POU6F2	.		245	-0.071653	0.15512	1.6217e-10	0.000316827		1	-0.3842	5.70892e-12	0.14761
chr7:39129617-39129669	4	AGAT	13	6	15,14,13,12,11,10	10	12	13	13	15	.	POU6F2	POU6F2	0	POU6F2_intron		cg20302533	chr7:39131163	1520	.	POU6F2	POU6F2	.		245	-0.075405	0.26115	1.0593e-17	2.06952e-11		1	-0.42943	1.14615e-16	0.18441
chr7:38373922-38373986	2	AT	33	3	35,34,33	33	33	33	33	35	.	TRG-AS1	TRG-AS1	0	TRG-AS1_intron		cg08940546	chr7:38354750	-19204	.	TRG-AS1	TRG-AS1	.		245	-0.137501	0.19327	5.3173e-13	1.03882e-06		1	-0.521776	2.6596e-28	0.27225
chr7:38364432-38364464	2	GT	17	3	18,17,16	16	17	17	17	18	.	TRG-AS1	TRG-AS1	0	TRG-AS1_intron		cg07858613	chr7:38350084	-14364	.	TRG-AS1	TRG-AS1	.		240	-0.095884	0.33021	1.7246e-22	3.3693e-16		1	-0.488098	1.87883e-23	0.23824
chr7:38364432-38364464	2	GT	17	3	18,17,16	16	17	17	17	18	.	TRG-AS1	TRG-AS1	0	TRG-AS1_intron		cg22797365	chr7:38359489	-4959	.	TRG-AS1	TRG-AS1	.		236	-0.131355	0.54031	2.2786e-41	4.45163e-35		1	-0.440023	1.97096e-17	0.19362
chr7:38302489-38302536	2	GT	24	13	27,26,25,24,23,22,21,20,19,18,17,16,14	14	19	21	22	27	.	.	TARP	28843	.		cg00574379	chr7:38304854	2341.5	.	.	TARP	.		243	-0.017106	0.1958	4.5082e-13	8.80754e-07		1	-0.344209	3.82663e-08	0.11848
chr7:38276010-38276042	2	GT	17	6	19,18,17,16,15,14	14	15	17	17	19	.	.	TARP	2364	.		cg05282889	chr7:38256792	-19234	.	.	TARP	.		232	-0.031849	0.16006	2.4989e-10	0.000488203		1	-0.603382	2.3419e-41	0.36407
chr7:38276010-38276042	2	GT	17	6	19,18,17,16,15,14	14	15	17	17	19	.	.	TARP	2364	.		cg19476573	chr7:38250147	-25879	.	.	TARP	.		229	-0.032963	0.19328	3.0587e-12	5.97569e-06		1	-0.481913	2.36128e-22	0.23224
chr7:38276010-38276042	2	GT	17	6	19,18,17,16,15,14	14	15	17	17	19	.	.	TARP	2364	.		cg06863814	chr7:38270421	-5605	.	TARP	TARP	.		244	-0.030675	0.25373	4.1928e-17	8.19135e-11		1	-0.518797	2.59324e-27	0.26915
chr7:38193283-38193311	3	GTT	10	4	12,11,10,9	9	10	10	11	12	.	STARD3NL	STARD3NL	0	STARD3NL_intron		cg02695349	chr7:38229640	36342	.	STARD3NL	STARD3NL	.		243	-0.04948	0.17414	1.173e-11	2.29165e-05		1	-0.299848	3.70253e-05	0.089909
chr7:37963014-37963066	6	AACAAT	9	7	16,15,14,13,12,11,9	9	13	14	14	16	.	.	EPDR1	11075	.		cg18806707	chr7:37958814	-4226	.	.	EPDR1	.		243	-0.072384	0.59372	4.85e-49	9.4753e-43		1	-0.746465	1.04076e-78	0.55721
chr7:37953669-37953696	4	AAAC	7	5	10,9,8,7,5	5	8	8	9	10	.	.	EPDR1	1730	.		cg18806707	chr7:37958814	5131.5	.	.	EPDR1	.		244	-0.086847	0.1727	1.3183e-11	2.57552e-05		1	-0.459478	4.76504e-20	0.21112
chr7:37754984-37755024	2	AC/GT	22	8	28,27,26,25,24,23,22,20	20	23	25	25	28	.	.	GPR141	11150	.		cg03305585	chr7:37766194	11190	.	.	GPR141	.		245	0.017703	0.16733	2.6681e-11	5.21259e-05		0	0	0	0
chr7:37574060-37574113	2	AC	27	9	32,30,29,28,27,25,24,23,22	22	24	27	29	32	.	.	GPR141	109653	.		cg22496306	chr7:37558790	-15296.5	.	.	ELMO1	.		245	-0.011105	0.15429	1.8298e-10	0.000357483		1	-0.574596	7.05898e-37	0.33016
chr7:37561438-37561492	2	CT/GT	28	7	30,29,28,27,26,25,24	24	25	28	28	30	.	.	ELMO1	112113	.		cg22496306	chr7:37558790	-2675	.	.	ELMO1	.		245	-0.015917	0.17604	7.2503e-12	1.41647e-05		1	-0.579111	7.3111e-38	0.33537
chr7:37362212-37362234	2	AT	12	5	16,15,14,13,12	12	12	12	13	16	.	ELMO1	ELMO1	0	ELMO1_intron		cg18891815	chr7:37337704	-24518	.	ELMO1	ELMO1	.		243	0.12003	0.26414	8.7849e-18	1.71628e-11		1	0.489111	7.95334e-24	0.23923
chr7:37256491-37256593	4	AGGG/AAGG/AGGG	27	3	27,26,23	23	26	27	27	27	.	ELMO1	ELMO1	0	ELMO1_intron		cg17592875	chr7:37255625	-917	.	ELMO1	ELMO1	.		243	-0.037092	0.2143	2.612e-14	5.10299e-08		1	-0.398873	1.60163e-11	0.1591
chr7:3723659-3723679	2	GT	11	9	16,15,14,13,12,11,10,9,8	8	11	11	11	16	.	SDK1	SDK1	0	SDK1_intron		cg22703520	chr7:3722640	-1029	.	SDK1	SDK1	.		244	0.033657	0.21711	1.4895e-14	2.90999e-08		1	0.39384	4.83394e-13	0.15511
chr7:37180813-37180832	2	AC	11	4	12,11,10,9	9	9	9	11	12	.	ELMO1	ELMO1	0	ELMO1_intron		cg13707733	chr7:37182252	1429.5	.	ELMO1	ELMO1	.		242	0.016327	0.16985	2.4363e-11	4.75973e-05		0	0	0	0
chr7:36707832-36707866	5	CTTTT	8	4	9,8,7,6	6	6	6	8	9	.	AOAH	AOAH	0	AOAH_intron		cg13137259	chr7:36659258	-48591	.	AOAH	AOAH	.		245	-0.064827	0.17713	6.1547e-12	1.20243e-05		1	-0.363469	3.54104e-10	0.13211
chr7:36707832-36707866	5	CTTTT	8	4	9,8,7,6	6	6	6	8	9	.	AOAH	AOAH	0	AOAH_intron		cg18826771	chr7:36721226	13377	.	AOAH	AOAH	.		243	-0.064338	0.28852	1.4507e-19	2.83419e-13		1	-0.620524	1.03886e-45	0.38505
chr7:36660309-36660323	4	GTTT	5	3	5,4,3	3	4	4	4	5	.	AOAH	AOAH	0	AOAH_intron		cg17467642	chr7:36658749	-1567	.	AOAH	AOAH	.		245	-0.130977	0.18374	2.2725e-12	4.43972e-06		1	-0.530877	1.13435e-29	0.28183
chr7:36660309-36660323	4	GTTT	5	3	5,4,3	3	4	4	4	5	.	AOAH	AOAH	0	AOAH_intron		cg04278296	chr7:36657233	-3083	.	AOAH	AOAH	.		245	-0.127592	0.21837	1.0778e-14	2.10567e-08		1	-0.460847	4.12475e-20	0.21238
chr7:36660309-36660323	4	GTTT	5	3	5,4,3	3	4	4	4	5	.	AOAH	AOAH	0	AOAH_intron		cg13137259	chr7:36659258	-1058	.	AOAH	AOAH	.		245	-0.225908	0.29978	1.454e-20	2.84064e-14		1	-0.597737	3.77554e-41	0.35729
chr7:36271799-36271899	5	ATTCT	20	14	22,21,20,19,18,17,16,15,14,13,12,11,10,9	9	11	14	16	22	.	EEPD1	EEPD1	0	EEPD1_intron		cg25854875	chr7:36286397	14548	.	EEPD1	EEPD1	.		242	-0.009934	0.15254	3.0526e-10	0.000596377		1	-0.359792	3.75166e-09	0.12945
chr7:35584891-35584914	2	GT	12	5	13,12,11,10,9	9	9	10	12	13	.	.	HERPUD2	47746	.		cg20437986	chr7:35557255	-27647.5	.	.	HERPUD2	.		243	-0.027607	0.21908	1.2395e-14	2.42157e-08		1	-0.321123	1.37971e-06	0.10312
chr7:35576726-35576752	5	AAAAG	5	7	9,8,7,6,5,4,3	3	5	6	6	9	.	.	HERPUD2	55908	.		cg20437986	chr7:35557255	-19484	.	.	HERPUD2	.		244	0.052697	0.2394	4.3128e-16	8.42579e-10		1	0.357379	1.48471e-09	0.12772
chr7:35568372-35568464	2	AT	47	17	31,30,29,28,27,26,25,24,23,22,21,20,19,18,17,16,15	15	16	19	26	31	.	.	HERPUD2	64196	.		cg20437986	chr7:35557255	-11163	.	.	HERPUD2	.		232	-0.010936	0.37333	3.8976e-25	7.61462e-19		1	-0.505262	5.97572e-23	0.25529
chr7:35558067-35558094	2	GT	14	5	17,16,15,14,12	12	14	15	16	17	.	.	HERPUD2	74566	.		cg20437986	chr7:35557255	-825.5	.	.	HERPUD2	.		244	0.041703	0.27176	2.1056e-18	4.11365e-12		1	0.446184	2.81756e-18	0.19908
chr7:35526061-35526099	2	GT	20	12	27,26,25,23,22,21,20,19,18,17,16,15	15	16	17	17	27	.	.	HERPUD2	106561	.		cg26402776	chr7:35530865	4785	.	.	HERPUD2	.		245	-0.031482	0.32012	3.9144e-22	7.64745e-16		1	-0.5999	1.44623e-41	0.35988
chr7:35037001-35037043	5	AGGGG	9	3	11,9,8	8	8	8	9	11	DPY19L1	DPY19L1	DPY19L1	0	DPY19L1_intron		cg06047071	chr7:35038594	1572	DPY19L1	.	DPY19L1	CpG:_166_Shore_S		166	-0.077839	0.29239	5.4679e-14	1.06825e-07		0	0	0	0
chr7:35037001-35037043	5	AGGGG	9	3	11,9,8	8	8	8	9	11	DPY19L1	DPY19L1	DPY19L1	0	DPY19L1_intron		cg13068698	chr7:35038470	1448	DPY19L1	.	DPY19L1	CpG:_166_Shore_S		163	-0.219513	0.65892	1.9123e-39	3.736e-33		0	0	0	0
chr7:35007584-35007625	2	GT/AT	21	4	22,21,19,18	18	19	21	21	22	.	DPY19L1	DPY19L1	0	DPY19L1_intron		cg06047071	chr7:35038594	30989.5	DPY19L1	.	DPY19L1	CpG:_166_Shore_S		244	-0.021371	0.17141	1.5978e-11	3.12157e-05		1	-0.383119	9.19652e-12	0.14678
chr7:35007584-35007625	2	GT/AT	21	4	22,21,19,18	18	19	21	21	22	.	DPY19L1	DPY19L1	0	DPY19L1_intron		cg13068698	chr7:35038470	30865.5	DPY19L1	.	DPY19L1	CpG:_166_Shore_S		241	-0.066776	0.41425	1.389e-29	2.71365e-23		1	-0.625843	1.01424e-46	0.39168
chr7:34963698-34963731	2	GT	18	3	20,18,13	13	18	18	18	20	.	DPY19L1	DPY19L1	0	DPY19L1_intron		cg00004260	chr7:34992129	28414.5	.	DPY19L1	DPY19L1	.		244	-0.014728	0.16123	7.2051e-11	0.000140764		1	-0.327826	4.03314e-07	0.10747
chr7:34449787-34449826	2	AC	23	13	26,25,24,23,22,21,20,19,17,16,15,13,12	12	21	22.5	23	26	.	NPSR1-AS1	NPSR1-AS1	0	NPSR1-AS1_intron		cg18087248	chr7:34453376	3569.5	.	NPSR1-AS1	NPSR1-AS1	.		245	-0.012109	0.33886	1.2759e-23	2.49269e-17		0	0	0	0
[truncated: 17,407 more rows]
