# Supplementary material for: Genome-wide evaluation of the effect of short tandem repeat variation on local DNA methylation
Source: HighWire-hosted journal article supplement (doi:10.1101/gr.277057.122), 2022-12-28
Supplement: Supplemental_Table_S3.xlsx [file Supplemental_Table_S3.xlsx]

## Sheet: ST3 - mSTRs motif properties
ST 3 - Motif properties of mSTRs' motif
	Sequence properties of mSTRs' motif					Length properties of meSTRs' motif
Motif	# of STRs per motif	Fisher test P-value	Bonferroni-adjusted P-value	Odds Ratio		Motif Length (bp)	# mSTRs with motif size	# STRs with motif size	Odds ratio	Fisher test P-value
ACGC	12	2.5719e-05	0.00200608	14.11		2	7000	77941	0.7634	<0.0001
AGGGC	15	0.0083219	0.649108	5.04		3	997	8169	1.247	<0.0001
CCCCG	55	8.5049e-07	6.63382e-05	4.91		4	2692	24582	1.13	<0.0001
CCCCGG	26	0.00689	0.53742	3.71		5	924	6878	1.38	<0.0001
AACC	95	2.8015e-06	0.000218517	3.41		6	299	2153	1.4	<0.0001
AGCC	12	0.087342	6.81268	3.36
ACAGAG	17	0.060984	4.75675	3.1
CCCCCG	43	0.0042588	0.332186	3.05
AACCCT	14	0.1265	9.867	2.75
AAGGGG	14	0.1265	9.867	2.75
CCG	263	1.4994e-08	1.16953e-06	2.61
AGAGGC	10	0.22665	17.6787	2.52
AATC	152	0.0015425	0.120315	2.08
ACTC	53	0.053113	4.14281	2.06
CAGCCC	18	0.21834	17.0305	2.01
ACCC	25	0.27854	21.7261	1.92
CG	296	0.00014823	0.0115619	1.9
AAATG	20	0.4189	32.6742	1.78
AGC	203	0.0067706	0.528107	1.75
AACAT	103	0.057546	4.48859	1.72
AAAAAT	129	0.063035	4.91673	1.63
AAGC	43	0.27855	21.7269	1.63
AAAC	3946	4.2878e-22	3.34448e-20	1.62
AAAAC	2342	5.0201e-14	3.91568e-12	1.62
CCCG	29	0.32818	25.598	1.61
AAAAAC	471	0.0011975	0.093405	1.59
AATGG	15	0.63997	49.9177	1.55
AAACT	23	0.45839	35.7544	1.51
AAC	2029	1.9593e-07	1.52825e-05	1.44
AAAAG	1592	2.3098e-05	0.00180164	1.4
AATG	893	0.001514	0.118092	1.4
AAAAAG	540	0.01279	0.99762	1.4
AATT	121	0.33848	26.4014	1.32
AAG	386	0.10898	8.50044	1.3
AGG	342	0.13014	10.1509	1.3
AAAT	10934	1.7334e-10	1.35205e-08	1.24
ACAT	547	0.11625	9.0675	1.24
AGAGGG	359	0.22994	17.9353	1.23
AAAAT	2421	0.002962	0.231036	1.22
ACAG	160	0.48853	38.1053	1.2
AAATAT	19	0.68771	53.6414	1.18
AAGAG	96	0.59265	46.2267	1.17
AAT	4991	0.11847	9.24066	1.08
AAAG	2597	0.38733	30.2117	1.06
ACC	158	0.78152	60.9586	1.06
AAGT	21	0.71438	55.7216	1.06
ATC	554	0.76621	59.7644	1.04
ACT	86	0.85105	66.3819	1.03
AACT	33	1	78	1.01
AG	8700	0.61474	47.9497	0.98
AGGG	557	0.9409	73.3902	0.97
AAATT	60	1	78	0.92
AAGAGG	12	1	78	0.92
ATATG	12	1	78	0.92
ATCC	1002	0.43863	34.2131	0.91
AC	56572	3.1113e-10	2.42681e-08	0.88
AAGGG	101	0.86203	67.2383	0.87
AAAGG	194	0.61638	48.0776	0.84
AGAGG	78	0.84382	65.818	0.84
CCCAC	13	1	78	0.84
AAGG	2020	0.025702	2.00476	0.83
AT	19339	1.0112e-23	7.88736e-22	0.75
ACCT	60	0.65623	51.1859	0.72
AGGGGG	34	0.76561	59.7176	0.63
AGGC	74	0.41336	32.2421	0.58
CACCCC	19	1	78	0.56
ACATAT	118	0.14938	11.6516	0.54
ACACAT	42	0.585	45.63	0.5
AATAT	134	0.06941	5.41398	0.47
ACTAT	46	0.43529	33.9526	0.46
AGAT	3477	6.9363e-37	5.41031e-35	0.37
AGATAT	182	0.0040765	0.317967	0.34
AATAG	100	0.034212	2.66854	0.31
AATAC	66	0.12702	9.90756	0.31
AAACC	39	0.25716	20.0585	0.26
