# Supplementary material for: Genome-wide evaluation of the effect of short tandem repeat variation on local DNA methylation
Source: HighWire-hosted journal article supplement (doi:10.1101/gr.277057.122), 2022-12-28
Supplement: Supplemental_Table_S4_JDedit.xlsx [file Supplemental_Table_S4_JDedit.xlsx]

## Sheet: ST 4 - CAVIAR Fine mapping 
ST 4 - CAVIAR fine mapping
STR coordinates, hg38	ProbeID	STR Causal Probability CAVIAR
chr14:100344062-100344106	cg21176127	0.300736
chr16:19839145-19839176	cg14946813	0.301471
chr5:113936731-113936756	cg03001465	0.302782
chr5:174386747-174386805	cg19117047	0.303897
chr2:162123414-162123444	cg22400605	0.304063
chr7:30496316-30496352	cg19071544	0.304191
chr7:1887412-1887423	cg11611357	0.304766
chr6:29191545-29191571	cg24237397	0.307548
chr12:125110190-125110250	cg27295011	0.309245
chr6:30444023-30444073	cg09289820	0.30938
chr6:73263040-73263084	cg01394339	0.309707
chr6:29677769-29677797	cg24938286	0.311334
chr3:38054198-38054248	cg07831833	0.312163
chr6:161170474-161170513	cg15453967	0.313157
chr9:129462301-129462351	cg14854366	0.313642
chr11:77621295-77621327	cg06061081	0.320822
chr19:7475526-7475560	cg27308652	0.324722
chr13:27987883-27987935	cg07911080	0.33068
chr4:1690809-1690839	cg15467503	0.337493
chr4:85612084-85612122	cg13879055	0.3387
chr4:659699-659710	cg20444990	0.33891
chr12:53660855-53660869	cg27479634	0.339142
chr7:124038447-124038466	cg15731053	0.341385
chr10:70148787-70148818	cg07427573	0.345952
chr19:35003139-35003198	cg22045942	0.351446
chr2:237138882-237138916	cg19137817	0.358918
chr3:155281000-155281022	cg15913846	0.359098
chr3:42174648-42174661	cg24877842	0.359835
chr6:29676103-29676125	cg12463578	0.360641
chr20:46027629-46027657	cg16617674	0.361081
chr2:169733591-169733627	cg06776107	0.365752
chr1:173204851-173204942	cg16600909	0.375872
chr7:27152078-27152145	cg23590202	0.378301
chr2:105236564-105236578	cg18192325	0.38109
chr11:59458439-59458478	cg00706994	0.388201
chr22:42989868-42989915	cg22282916	0.391655
chr15:67834538-67834561	cg20555282	0.39411
chr5:1004196-1004236	cg03877420	0.394889
chr10:70136528-70136568	cg25502086	0.405413
chr7:39130148-39130181	cg15212455	0.407088
chr19:6389255-6389298	cg05968233	0.407711
chr5:143252758-143252786	cg21177852	0.407947
chr16:84197185-84197207	cg18299261	0.408852
chr20:62682650-62682677	cg18424841	0.412002
chr2:105236564-105236578	cg04850045	0.412832
chr17:43166135-43166177	cg10527302	0.416113
chr6:56718076-56718101	cg00442390	0.416368
chr5:80634705-80634727	cg24059623	0.423813
chr4:38052168-38052195	cg24826020	0.42467
chr2:237908411-237908439	cg20002901	0.426366
chr6:30000958-30000984	cg09368485	0.426626
chr5:97009683-97009698	cg21099238	0.428514
chr3:198072522-198072544	cg17222645	0.42892
chr5:179633291-179633316	cg20773320	0.430409
chr9:11591730-11591756	cg14390656	0.430437
chr16:11498498-11498521	cg01389428	0.433855
chr9:94261015-94261049	cg13980266	0.435961
chr9:91715503-91715539	cg20351959	0.444606
chr9:125885799-125885819	cg18896820	0.447401
chr8:97834548-97834582	cg24934137	0.448706
chr6:26365475-26365517	cg16893549	0.455677
chr17:17665380-17665400	cg23051272	0.459063
chr15:69666649-69666676	cg10438048	0.464143
chr1:211494470-211494500	cg06436493	0.470156
chr1:28874274-28874328	cg03502625	0.470782
chr5:102399945-102399967	cg23182263	0.471238
chr7:99144016-99144048	cg05967295	0.47485
chr1:203744828-203744848	cg20410334	0.476869
chr5:76912825-76912915	cg16370863	0.477161
chr13:43882543-43882586	cg16077991	0.482072
chr9:134932820-134932843	cg18597176	0.485667
chr8:54170135-54170157	cg06042504	0.487089
chr19:3140743-3140771	cg08353606	0.487908
chr2:9753458-9753484	cg03959186	0.488251
chr12:53660855-53660869	cg22997177	0.492279
chr10:95672161-95672173	cg12304200	0.492888
chr19:6389255-6389298	cg04072767	0.492934
chr1:40726096-40726126	cg20711480	0.494022
chr15:26593982-26594004	cg01251603	0.496812
chr5:171742304-171742340	cg05990083	0.499412
chr8:134887046-134887075	cg24129307	0.502928
chr11:14302065-14302111	cg02886208	0.504982
chr4:174041456-174041494	cg24914139	0.505941
chr17:50781782-50781836	cg11872743	0.509582
chr9:114929875-114929920	cg10912203	0.511726
chr1:207320877-207320938	cg22687766	0.515014
chr12:64039629-64039660	cg00781208	0.515143
chr17:50781782-50781836	cg19140429	0.51653
chr1:65791915-65791986	cg10552807	0.523456
chr1:227897935-227897961	cg21724329	0.523836
chr11:68998217-68998249	cg05180995	0.530247
chr7:4809658-4809700	cg03697173	0.53029
chr2:82846404-82846427	cg20909234	0.533597
chr15:63382290-63382305	cg18093770	0.539187
chr11:69444806-69444841	cg12889594	0.540976
chr3:58587475-58587519	cg11603443	0.545599
chr8:41663085-41663141	cg01678292	0.548102
chr2:134313038-134313092	cg11866539	0.551288
chr2:188602999-188603047	cg22093885	0.556172
chr8:27774167-27774193	cg12564175	0.557749
chr11:66537927-66537962	cg24423806	0.562742
chr16:69395823-69395837	cg01276562	0.564209
chr1:24866004-24866033	cg15054019	0.56922
chr7:25664305-25664351	cg23417171	0.573947
chr11:128397940-128397974	cg05448032	0.577601
chr16:12092286-12092308	cg12441500	0.579593
chr6:133889312-133889377	cg24215443	0.581023
chr17:49913836-49913919	cg05327490	0.582086
chr15:40563678-40563708	cg05636663	0.585565
chr16:28152075-28152089	cg03307560	0.588733
chr19:43537772-43537805	cg22159528	0.589198
chr17:50781782-50781836	cg09889948	0.589297
chr19:29276917-29276942	cg11855710	0.590794
chr11:1809471-1809495	cg24720849	0.592675
chr3:120412029-120412071	cg21790991	0.594219
chr1:112465446-112465467	cg17569616	0.594261
chr16:12092286-12092308	cg01990910	0.595312
chr7:27146237-27146274	cg19240213	0.596062
chr10:13503713-13503738	cg24867665	0.596755
chr1:230266990-230267018	cg16517298	0.600372
chr5:150439043-150439096	cg23246802	0.60107
chr11:14302065-14302111	cg02251663	0.603177
chr4:152930963-152931025	cg27178338	0.603742
chr7:36707832-36707866	cg18826771	0.606355
chr16:1432692-1432735	cg16811771	0.606556
chr12:389552-389590	cg13167383	0.610058
chr20:32778943-32778980	cg17475857	0.61467
chr12:3096532-3096552	cg05821271	0.618416
chr2:241216822-241216837	cg01194721	0.620575
chr7:124971785-124971817	cg16525610	0.623757
chr7:12804266-12804291	cg16879993	0.624188
chr16:57539821-57539835	cg09671611	0.624469
chr21:33160384-33160396	cg20558272	0.629333
chr19:52937132-52937160	cg22029073	0.631473
chr20:32756099-32756143	cg01844435	0.638272
chr15:78039752-78039785	cg19708541	0.640043
chr20:31807738-31807823	cg01213864	0.641647
chr3:111992227-111992247	cg22488352	0.641803
chr4:3746874-3746901	cg06520877	0.643532
chr6:11653364-11653423	cg20560873	0.643595
chr2:25173465-25173490	cg21331367	0.645846
chr2:105236564-105236578	cg22022881	0.648589
chr14:59418215-59418292	cg21493768	0.648758
chr19:57225191-57225219	cg26730619	0.650054
chr1:177354152-177354194	cg05160879	0.653255
chr1:21620853-21620871	cg09975259	0.657386
chr17:3699053-3699094	cg06468454	0.657826
chr17:27355500-27355571	cg17590003	0.658948
chr15:26593982-26594004	cg13874969	0.659626
chr4:40189898-40189940	cg12377355	0.660686
chr3:183491094-183491125	cg02939781	0.662501
chr12:121283815-121283841	cg03422016	0.663165
chr1:65791915-65791986	cg04704294	0.675394
chr6:127374990-127375016	cg16867461	0.681889
chr2:237908411-237908439	cg09861583	0.684283
chr15:58750646-58750679	cg15770593	0.684822
chr20:53882032-53882061	cg17692798	0.687928
chr1:4651360-4651376	cg16937007	0.689354
chr11:14302065-14302111	cg22961513	0.690941
chr6:78606947-78606992	cg20768475	0.691811
chr6:32310735-32310762	cg08484972	0.692778
chr12:50074861-50074907	cg08189863	0.699722
chr7:20794622-20794653	cg14021133	0.700531
chr16:18827845-18827878	cg01079632	0.701592
chr22:45309805-45309823	cg00733150	0.703398
chr11:66824421-66824463	cg10329874	0.709029
chr22:23630413-23630426	cg01280589	0.710152
chr12:6446777-6446800	cg22395761	0.711422
chr17:43186004-43186051	cg25918947	0.71272
chr10:108941591-108941630	cg14818653	0.713442
chr18:63870654-63870699	cg11559014	0.71583
chr1:209937537-209937588	cg07510284	0.717089
chr3:195759919-195759939	cg01784063	0.72243
chr8:14497549-14497608	cg27405903	0.723396
chr5:151787897-151787947	cg12924095	0.724162
chr2:143042584-143042678	cg05058758	0.727919
chr15:100565278-100565314	cg21700663	0.730788
chr5:96666258-96666285	cg01741836	0.731257
chr12:9695856-9695894	cg24191225	0.733062
chr16:66553161-66553181	cg12912323	0.736232
chr5:131204743-131204761	cg00528676	0.737497
chr16:49479543-49479590	cg07442408	0.737521
chr2:170819292-170819316	cg01089319	0.747385
chr15:24893209-24893235	cg25682399	0.748914
chr12:122276383-122276405	cg07254438	0.753757
chr12:124861877-124861894	cg15282973	0.754433
chr8:823311-823340	cg01143440	0.75681
chr2:16610898-16610937	cg07712663	0.756974
chr8:41433933-41433956	cg14770361	0.758968
chr19:8039404-8039458	cg25858652	0.759346
chr2:170819292-170819316	cg14005211	0.759488
chr2:239911671-239911698	cg11161769	0.76154
chr11:43961702-43961748	cg10350350	0.763709
chr9:135332241-135332283	cg11776763	0.764022
chr3:12964300-12964326	cg13071069	0.765881
chr22:23893564-23893585	cg04642813	0.765964
chr12:48305800-48305837	cg02506706	0.769178
chr2:109097304-109097360	cg07548255	0.770722
chr8:142469158-142469181	cg20063965	0.772796
chr6:18234280-18234301	cg26498620	0.774399
chr19:33765054-33765073	cg06665366	0.777689
chr5:112878051-112878067	cg04114590	0.778528
chr20:37485417-37485450	cg24675557	0.782551
chr1:152871416-152871434	cg00647966	0.788229
chr17:62398703-62398723	cg26517847	0.789381
chr4:176877646-176877706	cg22648556	0.791196
chr6:38253115-38253147	cg27655671	0.792234
chr6:56283858-56283905	cg12569497	0.797933
chr15:62109399-62109417	cg24855921	0.799344
chr12:50505002-50505022	cg20014596	0.800897
chr2:105236564-105236578	cg00310410	0.806642
chr11:69444806-69444841	cg07241660	0.808635
chr1:26324492-26324536	cg19677267	0.809254
chr4:93825336-93825362	cg16502931	0.813886
chr19:58543063-58543091	cg04170623	0.814112
chr9:114930603-114930640	cg10912203	0.814197
chr7:55887601-55887639	cg01200051	0.816254
chr10:93702523-93702548	cg02868254	0.816924
chr20:32760652-32760691	cg01844435	0.824802
chr20:32778943-32778980	cg01844435	0.825698
chr6:27747788-27747874	cg19620893	0.826825
chr13:24052378-24052397	cg13952242	0.827425
chr3:198087448-198087498	cg21260733	0.830527
chr2:95800451-95800483	cg06876956	0.832119
chr17:80466062-80466100	cg14700941	0.833347
chr15:26593982-26594004	cg20085925	0.833943
chr2:237908411-237908439	cg04916821	0.834207
chr3:190323004-190323035	cg03597510	0.836552
chr2:10789408-10789432	cg04351776	0.837727
chr1:28874274-28874328	cg25727366	0.847074
chr20:60125396-60125433	cg11218661	0.847441
chr6:42959499-42959540	cg16682276	0.847774
chr16:1432692-1432735	cg23607889	0.849832
chr2:64991594-64991620	cg25534249	0.852256
chr20:37485417-37485450	cg00576435	0.853616
chr10:60769055-60769097	cg27449050	0.854211
chr6:42959499-42959540	cg24815792	0.8543
chr1:231373670-231373715	cg18815120	0.854846
chr22:24325539-24325578	cg15548624	0.856195
chr20:37485417-37485450	cg12862537	0.858349
chr3:196444589-196444712	cg10672004	0.859296
chr1:10783247-10783288	cg18994297	0.859714
chr1:32272574-32272657	cg26778877	0.860732
chr11:60289575-60289624	cg23754934	0.861625
chr2:174843975-174843993	cg18734246	0.861942
chr19:14582958-14582997	cg17934790	0.870592
chr5:177357763-177357788	cg00900628	0.871984
chr2:82798631-82798661	cg20909234	0.872598
chr13:114141248-114141283	cg15513719	0.87309
chr6:42959499-42959540	cg07604616	0.873097
chr11:234404-234433	cg27398497	0.874327
chr13:25026920-25026944	cg08251288	0.876752
chr21:42591574-42591598	cg23046510	0.876802
chr15:50919536-50919587	cg23255141	0.878433
chr19:56947031-56947110	cg00130086	0.879285
chr10:104329044-104329092	cg22511388	0.87937
chr11:66996780-66996828	cg02639650	0.879863
chr16:49484759-49484854	cg05713954	0.880279
chr5:135892734-135892779	cg19031085	0.881323
chr1:12047247-12047306	cg01407107	0.881389
chr5:660205-660229	cg25149516	0.881542
chr22:36703239-36703317	cg24200259	0.883191
chr17:37508735-37508785	cg15753916	0.885163
chr1:67962472-67962522	cg22082780	0.886931
chr6:32410970-32410985	cg18067840	0.887913
chr15:38557602-38557646	cg27220062	0.887931
chr3:143606401-143606468	cg26537443	0.888366
chr6:42910027-42910075	cg09645574	0.889501
chr16:58267987-58268063	cg15255408	0.89142
chr21:42591574-42591598	cg03254566	0.892597
chr2:19572727-19572762	cg10260572	0.895486
chr7:144115855-144115880	cg01650433	0.895852
chr16:77403995-77404054	cg02240171	0.903933
chr15:26593982-26594004	cg14859324	0.905116
chr1:46198519-46198555	cg04036898	0.906026
chr16:49479543-49479590	cg00816080	0.90698
chr6:30051777-30051813	cg12633154	0.908421
chr22:25446449-25446475	cg04572826	0.909153
chr16:26788759-26788808	cg05094970	0.909725
chr12:7093986-7094005	cg22095709	0.914859
chr9:131761959-131761990	cg07709065	0.917031
chr4:52860622-52860654	cg18147819	0.918766
chr19:58579912-58580010	cg26706163	0.91888
chr4:1730035-1730057	cg02885459	0.919271
chr2:64991594-64991620	cg05732767	0.920422
chr1:21449921-21449955	cg17800788	0.921982
chr3:50381982-50382022	cg07607196	0.922511
chr2:105236564-105236578	cg26874229	0.922567
chr7:11248394-11248448	cg19920378	0.923671
chr7:96999848-96999879	cg11113469	0.924525
chr4:165591918-165591968	cg05040398	0.924853
chr14:55580254-55580280	cg16907514	0.927026
chr15:74204941-74204964	cg14686792	0.927352
chr2:241216822-241216837	cg06087327	0.930092
chr17:40655027-40655124	cg07438660	0.930149
chr1:150579759-150579814	cg18016565	0.930711
chr6:15520690-15520706	cg13575562	0.931003
chr8:2274004-2274035	cg24320225	0.931283
chr15:45322843-45322883	cg20794766	0.931901
chr16:81636070-81636122	cg07574924	0.933437
chr6:30051777-30051813	cg16078649	0.933456
chr16:11496889-11496933	cg01389428	0.933561
chr4:85655767-85655852	cg13879055	0.933947
chr3:143164827-143164901	cg14022475	0.9343
chr11:112210752-112210783	cg11741468	0.934736
chr18:157912-158007	cg07301952	0.934937
chr13:35847624-35847658	cg02298831	0.935882
chr6:30051777-30051813	cg13401893	0.936257
chr4:40189898-40189940	cg22895468	0.936722
chr15:68549944-68549984	cg12960942	0.938571
chr16:31536544-31536575	cg12777862	0.939625
chr20:32688122-32688176	cg06235423	0.93983
chr6:29677769-29677797	cg20198768	0.941132
chr10:4734924-4734952	cg21641816	0.944268
chr14:104268183-104268211	cg11828983	0.945105
chr6:42910027-42910075	cg01075005	0.948335
chr2:9474539-9474557	cg01389413	0.949519
chr21:36555807-36555877	cg08621403	0.950011
chr16:3963098-3963143	cg00834536	0.951204
chr10:116212524-116212566	cg12271079	0.951922
chr7:9764960-9765081	cg08379654	0.952008
chr18:24460340-24460383	cg08043097	0.953113
chr5:144617988-144618013	cg20232216	0.953777
chr16:31536544-31536575	cg00605988	0.95408
chr1:21620853-21620871	cg03132729	0.956167
chr5:154672582-154672615	cg08893839	0.958992
chr6:13611196-13611259	cg25965299	0.959647
chr17:77145078-77145136	cg03268697	0.960269
chr3:52790264-52790292	cg18404041	0.960554
chr1:21479793-21479859	cg24430637	0.960588
chr7:1887412-1887423	cg26204448	0.960936
chr9:93113512-93113556	cg09547190	0.960946
chr12:121919126-121919145	cg12705353	0.961053
chr17:3699053-3699094	cg07394242	0.961949
chr16:33578848-33578871	cg04246864	0.962559
chr2:108637100-108637146	cg09176441	0.966091
chr6:30444023-30444073	cg01975734	0.966772
chr2:70110559-70110589	cg19638749	0.967365
chr7:1887412-1887423	cg04342202	0.967579
chr12:129086202-129086235	cg16533379	0.96828
chr19:48275420-48275458	cg08443203	0.968467
chr2:44951590-44951614	cg18045195	0.968856
chr16:1432692-1432735	cg09798061	0.96934
chr5:157013469-157013566	cg12943317	0.970234
chr2:44950868-44950916	cg18045195	0.970253
chr5:160229822-160229890	cg15140323	0.970659
chr12:95954569-95954611	cg07236190	0.97154
chr3:8737974-8738082	cg17615717	0.972358
chr8:106626045-106626069	cg25264181	0.973144
chr5:171457737-171457773	cg07158415	0.974017
chr1:52842420-52842477	cg08736216	0.974887
chr12:121904640-121904674	cg23821619	0.974955
chr17:74163380-74163467	cg03882001	0.97606
chr12:48247532-48247568	cg02506706	0.976077
chr7:95772112-95772171	cg10281478	0.976371
chr12:2226126-2226173	cg23427362	0.976564
chr2:231460671-231460726	cg12486897	0.97725
chr7:55189099-55189152	cg06669370	0.977288
chr7:100634178-100634220	cg22057462	0.977923
chr17:45182837-45182891	cg21779194	0.978149
chr6:56283858-56283905	cg12671627	0.978637
chr2:105236564-105236578	cg27422857	0.978994
chr16:74033875-74033905	cg06944758	0.979603
chr17:43177573-43177621	cg25918947	0.981118
chr15:43370976-43371006	cg06158227	0.981319
chr1:77887913-77888010	cg00332855	0.981383
chr8:19668342-19668360	cg00002190	0.984438
chr16:15949612-15949633	cg20158248	0.985054
chr21:45919815-45919853	cg18460830	0.985251
chr6:41494649-41494679	cg25953930	0.985262
chr8:106626045-106626069	cg07986251	0.985411
chr21:37457014-37457084	cg21805778	0.985551
chr1:202667467-202667514	cg25557285	0.985847
chr8:106606289-106606318	cg25264181	0.98619
chr4:85580154-85580177	cg21547204	0.986467
chr18:8023832-8023877	cg23168977	0.986809
chr8:42274525-42274547	cg23363015	0.986998
chr3:45594779-45594844	cg09608765	0.987899
chr9:33724403-33724427	cg00384816	0.987948
chr1:222813354-222813386	cg22352176	0.988143
chr17:61505694-61505827	cg11587957	0.989527
chr15:67222225-67222283	cg23977390	0.989685
chr18:146820-146872	cg07301952	0.989894
chr12:48903938-48903984	cg03711050	0.990121
chr1:7932654-7932757	cg13962846	0.990575
chr18:21179616-21179697	cg24965683	0.99066
chr13:30114809-30114825	cg11784564	0.991088
chr14:90780388-90780498	cg06209906	0.991106
chr20:58689818-58689842	cg26460720	0.991397
chr10:132397164-132397208	cg15278699	0.991683
chr2:218357260-218357290	cg07203607	0.99171
chr16:31536544-31536575	cg10091996	0.992371
chr6:127374990-127375016	cg12606138	0.992402
chr5:132485807-132485850	cg00255919	0.992615
chr10:3070899-3070925	cg01567034	0.992745
chr21:41442007-41442053	cg22725343	0.992779
chr13:38949197-38949242	cg22659262	0.993684
chr16:49484759-49484854	cg09231171	0.993747
chr16:76705076-76705105	cg23336815	0.99391
chr20:18059395-18059430	cg15931411	0.99411
chr12:93659283-93659307	cg21004565	0.994206
chr4:40928388-40928428	cg08025520	0.99435
chr2:26178879-26178913	cg16343374	0.994757
chr6:169868880-169868910	cg03363478	0.994862
chr14:60146668-60146702	cg20354474	0.995228
chr5:73519692-73519754	cg21594278	0.99525
chr17:5053333-5053359	cg01100690	0.995423
chr10:13298923-13298986	cg19018267	0.995545
chr7:144115855-144115880	cg03412967	0.995621
chr8:97893562-97893597	cg19139111	0.995665
chr17:5531145-5531232	cg19060895	0.995752
chr1:9279772-9279817	cg01102307	0.995884
chr1:10791724-10791769	cg00787856	0.996069
chr7:64147598-64147676	cg04732548	0.996206
chr20:2454018-2454048	cg01530965	0.996345
chr12:79594701-79594728	cg11258982	0.996425
chr8:95089463-95089476	cg05705068	0.996617
chr14:60153697-60153719	cg20354474	0.996684
chr1:100011680-100011737	cg11347139	0.996941
chr15:40106514-40106552	cg18494902	0.99698
chr1:208267466-208267493	cg06191042	0.996986
chr22:25448062-25448099	cg06787310	0.996993
chr6:29677769-29677797	cg01644592	0.997062
chr12:98447267-98447295	cg02471132	0.997228
chr7:44914980-44915029	cg00827748	0.99728
chr12:48903938-48903984	cg14995783	0.997314
chr8:30083752-30083791	cg08386913	0.997458
chr2:105236564-105236578	cg22878388	0.997473
chr12:93659283-93659307	cg13102120	0.997525
chr8:27593373-27593427	cg13879655	0.997582
chr20:58689818-58689842	cg16153071	0.99797
chr11:69444806-69444841	cg12368260	0.998003
chr2:9474539-9474557	cg14853772	0.998007
chr7:27146237-27146274	cg23403004	0.998206
chr7:29868519-29868536	cg15885771	0.998359
chr12:124388866-124388911	cg04052996	0.998382
chr10:2500798-2500822	cg15501526	0.998387
chr9:125970219-125970277	cg07715621	0.998417
chr14:60146668-60146702	cg06898279	0.998429
chr12:4816250-4816306	cg16807870	0.998497
chr1:11648973-11649005	cg00085122	0.998517
chr2:88265482-88265513	cg21445409	0.998524
chr2:235436492-235436537	cg15303062	0.998533
chr7:95772112-95772171	cg18032014	0.998551
chr1:211492049-211492092	cg06436493	0.998592
chr1:225336047-225336090	cg25926917	0.998685
chr20:58689818-58689842	cg17575833	0.998737
chr2:20418938-20418965	cg14841870	0.998751
chr17:55845888-55845939	cg26785370	0.998852
chr6:152574154-152574221	cg24658778	0.998867
chr21:32475880-32475930	cg15152208	0.998878
chr17:59894982-59895039	cg02095219	0.999013
chr1:208272647-208272746	cg06191042	0.99907
chr4:38403256-38403286	cg10989690	0.999071
chr11:67152906-67152953	cg13329032	0.999101
chr20:63772723-63772767	cg05867245	0.999228
chr17:50931938-50931994	cg15590387	0.999233
chr21:45479602-45479617	cg11113589	0.999267
chr19:41564325-41564372	cg22963705	0.999327
chr1:15050017-15050126	cg25835058	0.999371
chr8:49310859-49310888	cg02001299	0.99939
chr12:96210566-96210598	cg18954900	0.999409
chr8:106606289-106606318	cg07986251	0.999433
chr2:9474539-9474557	cg21471272	0.99946
chr10:42867073-42867102	cg27426351	0.999534
chr12:124388866-124388911	cg14951136	0.999573
chr1:56460470-56460520	cg11129964	0.999603
chr10:71213676-71213709	cg08905239	0.999642
chr15:78434345-78434369	cg18825076	0.999643
chr14:95370898-95370933	cg11033654	0.999696
chr16:56544128-56544162	cg08131344	0.999696
chr8:103498695-103498734	cg04852977	0.999704
chr10:2500798-2500822	cg08234415	0.999707
chr17:35449045-35449075	cg17653886	0.999713
chr3:8576198-8576234	cg07284347	0.999724
chr17:7113781-7113814	cg12969122	0.999734
chr1:88999096-88999123	cg14669130	0.999737
chr2:9474539-9474557	cg25230743	0.999738
chr11:109422123-109422160	cg27471124	0.999742
chr18:23188544-23188566	cg12421287	0.999743
chr3:197913319-197913369	cg11959851	0.999744
chr1:94396591-94396611	cg21306738	0.999756
chr14:99605370-99605395	cg04388666	0.999771
chr12:124388866-124388911	cg12154538	0.999786
chr21:36559173-36559211	cg08621403	0.999788
chr6:30050723-30050766	cg07382347	0.999789
chr20:63653573-63653592	cg03999872	0.999796
chr7:14903213-14903254	cg27458372	0.999798
chr1:3089916-3089941	cg24678113	0.99981
chr1:16882581-16882612	cg26664206	0.999833
chr20:3799485-3799538	cg02737268	0.999842
chr3:195695115-195695133	cg06277638	0.999857
chr1:16882581-16882612	cg12647302	0.999867
chr10:93435907-93435926	cg18082515	0.999867
chr5:170861820-170861870	cg23128634	0.999874
chr16:49484759-49484854	cg00816080	0.999877
chr2:42047933-42047978	cg00607755	0.999885
chr13:46444396-46444431	cg02234672	0.999897
chr14:60153697-60153719	cg06898279	0.9999
chr8:22210432-22210487	cg19750024	0.999903
chr8:42262427-42262458	cg23363015	0.999904
chr12:64039629-64039660	cg17367450	0.999908
chr7:65814334-65814350	cg11271990	0.999909
chr16:70148565-70148617	cg02046695	0.999922
chr17:40712987-40713033	cg15601504	0.999924
chr10:115445507-115445552	cg26739766	0.999933
chr17:30960701-30960756	cg26961260	0.999935
chr4:138865602-138865667	cg27125591	0.999935
chr16:49484759-49484854	cg07442408	0.999945
chr19:53962767-53962805	cg23752563	0.999952
chr1:7921339-7921382	cg13962846	0.999955
chr1:161851234-161851275	cg12648759	0.999957
chr17:30960701-30960756	cg06957310	0.99996
chr16:12092286-12092308	cg01574788	0.999964
chr12:124388866-124388911	cg24975642	0.999969
chr1:16882581-16882612	cg01327202	0.99997
chr7:162284-162325	cg01367328	0.999971
chr2:42047933-42047978	cg25011720	0.999974
chr2:3355813-3355841	cg01472464	0.999981
chr5:123216483-123216509	cg04547002	0.999982
chr20:2284274-2284403	cg04537723	0.999983
chr10:124922245-124922337	cg17391407	0.999984
chr17:80742944-80742960	cg12654199	0.999986
chr22:22585062-22585083	cg09762382	0.999986
chr14:85471477-85471526	cg06864351	0.999989
chr17:77727640-77727716	cg11120021	0.999989
chr5:177270155-177270190	cg12753579	0.999989
chr20:63359870-63359929	cg24600306	0.99999
chr12:47810805-47810866	cg05154234	0.999991
chr7:55887601-55887639	cg07109002	0.999991
chr15:38251698-38251743	cg03945400	0.999992
chr18:26225564-26225600	cg11128831	0.999993
chr4:26584413-26584471	cg18485093	0.999993
chr1:16882581-16882612	cg06488081	0.999994
chr13:114141248-114141283	cg22332045	0.999994
chr14:89028027-89028075	cg09391419	0.999994
chr4:7633572-7633590	cg19409174	0.999995
chr2:26178879-26178913	cg21261608	0.999996
chr20:53935649-53935733	cg11233911	0.999996
chr20:63823859-63823889	cg02052956	0.999996
chr10:103900688-103900745	cg14035185	0.999997
chr15:64840095-64840155	cg07774964	0.999997
chr3:30648420-30648462	cg13724812	0.999997
chr1:23218509-23218542	cg19743168	0.999998
chr12:129086202-129086235	cg22386460	0.999998
chr12:56116142-56116229	cg10069353	0.999998
chr14:104268183-104268211	cg20956390	0.999998
chr18:23202044-23202066	cg12421287	0.999998
chr19:43422151-43422275	cg14515893	0.999998
chr3:184543791-184543848	cg10264935	0.999998
chr4:85612084-85612122	cg21547204	0.999998
chr6:155013918-155013953	cg26601295	0.999998
chr7:130090768-130090795	cg09813917	0.999998
chr12:10010154-10010237	cg04314261	0.999999
chr12:17642052-17642107	cg02418442	0.999999
chr2:9474539-9474557	cg01808072	0.999999
chr6:125099513-125099555	cg12182186	0.999999
chr6:30050723-30050766	cg09279736	0.999999
chr8:106420731-106420759	cg10066109	0.999999
chr1:150579759-150579814	cg17724175	1
chr1:16882581-16882612	cg08222153	1
chr1:16882581-16882612	cg07926618	1
chr1:16882581-16882612	cg26803385	1
chr1:16882581-16882612	cg15209908	1
chr1:16882581-16882612	cg05930173	1
chr1:175743630-175743675	cg05996213	1
chr1:208256886-208256919	cg12895728	1
chr1:208267466-208267493	cg12895728	1
chr1:217133602-217133684	cg00256046	1
chr1:217133602-217133684	cg17434154	1
chr1:217133602-217133684	cg04217177	1
chr1:227126465-227126531	cg27064709	1
chr1:229369623-229369642	cg23830335	1
chr1:46540361-46540429	cg12896519	1
chr1:88999096-88999123	cg11309454	1
chr1:88999096-88999123	cg23627354	1
chr10:100681298-100681347	cg04918978	1
chr10:103900688-103900745	cg01727419	1
chr10:103963713-103963749	cg18738941	1
chr10:113539806-113539854	cg06456744	1
chr10:11715657-11715683	cg11589875	1
chr10:13772123-13772195	cg26708920	1
chr10:15434556-15434627	cg13848826	1
chr10:27656822-27656912	cg09289102	1
chr10:31862697-31862751	cg10501996	1
chr10:92930505-92930527	cg22185246	1
chr11:128450960-128450981	cg26899988	1
chr11:1914583-1914609	cg18032502	1
chr11:27472969-27473046	cg06731443	1
chr11:27472969-27473046	cg24451363	1
chr11:27472969-27473046	cg14346046	1
chr11:34308869-34308917	cg10885779	1
chr11:85968948-85968997	cg24343007	1
chr11:87467970-87468036	cg23198815	1
chr12:121904640-121904674	cg13699009	1
chr12:124388866-124388911	cg13031847	1
chr12:132372769-132372885	cg11144986	1
chr12:48106707-48106725	cg12381317	1
chr12:552293-552336	cg07656086	1
chr12:57693387-57693439	cg09271407	1
chr12:96124402-96124458	cg16593333	1
chr13:93234663-93234747	cg24940155	1
chr13:95516969-95517040	cg01346636	1
chr14:67188775-67188870	cg15445722	1
chr14:77497729-77497833	cg13130319	1
chr14:95370898-95370933	cg14228933	1
chr15:40106514-40106552	cg01739886	1
chr15:52136065-52136173	cg16325868	1
chr15:64824868-64824907	cg07774964	1
chr15:65029829-65029863	cg07872373	1
chr15:68721745-68721759	cg15917410	1
chr15:69666649-69666676	cg15520207	1
chr15:89776890-89776973	cg10461282	1
chr16:18962758-18962802	cg04547000	1
chr16:23067895-23067929	cg19112148	1
chr16:49484759-49484854	cg25592314	1
chr16:49590030-49590051	cg01672042	1
chr16:49590030-49590051	cg07957035	1
chr16:51431897-51431948	cg01754423	1
chr16:55500495-55500539	cg10662345	1
chr16:70148565-70148617	cg11892071	1
chr16:70148565-70148617	cg07321795	1
chr16:70148565-70148617	cg04494791	1
chr16:89613440-89613473	cg22723458	1
chr16:89613440-89613473	cg26086917	1
chr17:1230075-1230129	cg05856321	1
chr17:1230075-1230129	cg15257836	1
chr17:32142452-32142501	cg07235981	1
chr17:40476370-40476429	cg04647529	1
chr17:40655027-40655124	cg26165421	1
chr17:40655027-40655124	cg22285710	1
chr17:46278367-46278422	cg07427744	1
chr17:7113781-7113814	cg26955290	1
chr17:8384051-8384116	cg25731483	1
chr17:9768851-9768880	cg15458017	1
chr18:26134329-26134388	cg07428713	1
chr18:55586117-55586229	cg01245135	1
chr18:55586117-55586229	cg16648019	1
chr18:77084422-77084472	cg17266581	1
chr19:15684757-15684799	cg08701393	1
chr19:18787842-18787917	cg20185461	1
chr19:2308143-2308175	cg17117171	1
chr19:3135844-3135937	cg24055461	1
chr19:47035192-47035221	cg26482905	1
chr19:49113655-49113684	cg08382737	1
chr19:55338490-55338584	cg02626112	1
chr19:5689628-5689663	cg23630452	1
chr19:864043-864061	cg10613305	1
chr2:102447704-102447747	cg23256822	1
chr2:102447704-102447747	cg03938978	1
chr2:237923933-237924024	cg03098024	1
chr2:26178879-26178913	cg04902443	1
chr2:26178879-26178913	cg22920501	1
chr2:28910665-28910695	cg22748895	1
chr2:51032511-51032553	cg13594075	1
chr2:64991594-64991620	cg03233656	1
chr2:72224983-72225006	cg22018621	1
chr20:2454018-2454048	cg08746278	1
chr20:36890389-36890466	cg03695513	1
chr20:56347188-56347226	cg00169354	1
chr20:59400895-59400909	cg10704906	1
chr21:36549277-36549297	cg08621403	1
chr21:38808580-38808628	cg01359822	1
chr22:36353103-36353132	cg05128516	1
chr22:37150087-37150138	cg21307484	1
chr22:37282284-37282312	cg19751930	1
chr22:50628181-50628232	cg13909895	1
chr3:115693488-115693508	cg03395990	1
chr3:119468587-119468623	cg16642562	1
chr3:12003780-12003851	cg15873301	1
chr3:126385933-126385973	cg04426653	1
chr3:13633955-13633995	cg14789121	1
chr3:189944373-189944405	cg14339214	1
chr3:53156625-53156650	cg00727673	1
chr3:71729799-71729839	cg12807187	1
chr3:78849832-78849871	cg21055985	1
chr4:10535198-10535266	cg19892834	1
chr4:119355310-119355323	cg14867455	1
chr4:183399075-183399209	cg07824907	1
chr4:183399075-183399209	cg22440848	1
chr4:54570965-54571047	cg04797359	1
chr4:85655767-85655852	cg21547204	1
chr5:123285672-123285723	cg23949389	1
chr5:149682720-149682742	cg04507340	1
chr5:169265157-169265183	cg11855741	1
chr5:170861820-170861870	cg00871487	1
chr5:170861820-170861870	cg01579024	1
chr5:170861820-170861870	cg02091185	1
chr5:170861820-170861870	cg08358803	1
chr5:67245650-67245693	cg11553311	1
chr6:100107643-100107695	cg03462252	1
chr6:114962201-114962223	cg09222283	1
chr6:12365928-12365965	cg18244459	1
chr6:137977448-137977475	cg19548912	1
chr6:149847825-149847879	cg08944241	1
chr6:29677769-29677797	cg03147503	1
chr6:30050723-30050766	cg03343571	1
chr6:32067077-32067186	cg09889836	1
chr6:32378632-32378664	cg06871764	1
chr6:33874930-33874970	cg17566917	1
chr6:35415779-35415803	cg01876632	1
chr6:6688545-6688565	cg11302401	1
chr7:100634178-100634220	cg00269908	1
chr7:140232438-140232466	cg09316347	1
chr8:100172635-100172689	cg06636551	1
chr8:100372230-100372254	cg12182643	1
chr8:133217937-133217961	cg10191240	1
chr8:19664627-19664681	cg00002190	1
chr8:27593373-27593427	cg04803944	1
chr8:49170488-49170572	cg02168270	1
chr8:49181014-49181083	cg02168270	1
chr8:49209382-49209401	cg02168270	1
chr9:115604928-115604966	cg09992948	1
chr9:14465573-14465608	cg09846464	1
chr9:35490117-35490139	cg15271616	1

## Sheet: README
Header	Description
STR coordinates, hg38	Genomkic location for STR according to hg38 human assembly
ProbeID	Id for probe presnt on the Illumina 850K array
STR Causal Probability CAVIAR	Posterior probability provided by CAVIAR
