# Supplementary material for: Genome-wide evaluation of the effect of short tandem repeat variation on local DNA methylation
Source: HighWire-hosted journal article supplement (doi:10.1101/gr.277057.122), 2022-12-28
Supplement: Supplemental_Table_S6.xlsx [file Supplemental_Table_S6.xlsx]

## Sheet: ST 6 - fm-mSTRs and eSTRs
ST6. Co-occurrence of fm-mSTRs and eSTRs.
STR coordinates, hg38	Gene Id	chrom	Start gene	End gene	Strand	Gene Type	Gene Symbol	Number of observations per STR:gene	Slope Linear Regression	r2 Linear Regression	P-value	Bonferroni Pajusted P- value
chr6:30000958-30000984	ENSG00000181126.13	chr6	29790954	29797811	+	transcribed_unprocessed_pseudogene	HLA-V	380	174.636	0.70391	6.12e-102	2.6047e-96
chr1:21479793-21479859	ENSG00000142794.18	chr1	21440128	21485005	+	protein_coding	NBPF3	356	-21.9271	0.66049	4.77e-85	2.0281e-79
chr1:21449921-21449955	ENSG00000142794.18	chr1	21440128	21485005	+	protein_coding	NBPF3	401	196.679	0.58954	3.66e-79	1.5565e-73
chr6:29676103-29676125	ENSG00000204644.9	chr6	29672392	29681110	-	protein_coding	ZFP57	375	10.0395	0.59617	1.92e-75	8.1836e-70
chr6:29677769-29677797	ENSG00000204644.9	chr6	29672392	29681110	-	protein_coding	ZFP57	354	10.1002	0.58212	1.12e-68	4.7647e-63
chr6:42959499-42959540	ENSG00000124587.13	chr6	42963870	42979220	-	protein_coding	PEX6	400	-61.3589	0.48278	6.02e-59	2.5617e-53
chr15:45322843-45322883	ENSG00000171763.18	chr15	45402331	45421419	+	protein_coding	SPATA5L1	394	-72.4026	0.48641	1.1e-58	4.6831e-53
chr6:26365475-26365517	ENSG00000186470.13	chr6	26365159	26378320	+	protein_coding	BTN3A2	393	242.677	0.48604	1.77e-58	7.5251e-53
chr15:64824868-64824907	ENSG00000166839.16	chr15	64911902	64958700	+	protein_coding	ANKDD1A	395	-171.303	0.47508	5.79e-57	2.4624e-51
chr12:48247532-48247568	ENSG00000167528.12	chr12	48337180	48351414	-	protein_coding	ZNF641	394	410.857	0.38638	1.73e-43	7.3587e-38
chr2:102447704-102447747	ENSG00000234389.1	chr2	102438713	102440475	+	sense_intronic	AC007278.1	397	237.367	0.37853	1.03e-42	4.3853e-37
chr17:46278367-46278422	ENSG00000214401.4	chr17	46193576	46196723	+	antisense	KANSL1-AS1	228	-112.243	0.54912	5.79e-41	2.4613e-35
chr6:32410970-32410985	ENSG00000229391.7	chr6	32552713	32560022	-	transcribed_unprocessed_pseudogene	HLA-DRB6	349	134.174	0.38775	7.36e-39	3.1319e-33
chr15:64840095-64840155	ENSG00000166839.16	chr15	64911902	64958700	+	protein_coding	ANKDD1A	360	145.372	0.37025	7.76e-38	3.299e-32
chr12:48305800-48305837	ENSG00000167528.12	chr12	48337180	48351414	-	protein_coding	ZNF641	395	-662.615	0.33232	2.34e-36	9.9587e-31
chr2:102447704-102447747	ENSG00000115607.9	chr2	102418689	102452565	+	protein_coding	IL18RAP	397	755.912	0.31876	8.44e-35	3.5902e-29
chr17:43166135-43166177	ENSG00000279602.1	chr17	43360041	43361361	-	TEC	AC109326.1	394	-74.1609	0.3055	6.72e-33	2.8595e-27
chr15:45322843-45322883	ENSG00000171766.15	chr15	45361124	45402327	-	protein_coding	GATM	394	16.6532	0.29535	1.17e-31	4.9919e-26
chr6:30000958-30000984	ENSG00000204622.11	chr6	30005971	30009956	+	transcribed_unprocessed_pseudogene	HLA-J	380	11.03	0.29294	2.65e-30	1.1283e-24
chr15:45322843-45322883	ENSG00000259520.5	chr15	45251580	45279251	-	antisense	AC051619.5	394	2.88731	0.28225	4.44e-30	1.8893e-24
chr22:25448062-25448099	ENSG00000100058.12	chr22	25448105	25520854	+	transcribed_unprocessed_pseudogene	CRYBB2P1	386	243.137	0.28571	6.64e-30	2.8256e-24
chr2:102447704-102447747	ENSG00000236525.1	chr2	102433957	102435340	+	sense_intronic	AC007278.2	397	147.448	0.26346	4.59e-28	1.9517e-22
chr21:45479602-45479617	ENSG00000182871.14	chr21	45405137	45513720	+	protein_coding	COL18A1	398	1265.41	0.25692	2.29e-27	9.729e-22
chr12:389552-389590	ENSG00000120647.9	chr12	389273	442645	+	protein_coding	CCDC77	387	8.84545	0.2588	7.28e-27	3.0954e-21
chr19:7475526-7475560	ENSG00000104883.7	chr19	7476875	7497449	-	protein_coding	PEX11G	401	5.99994	0.24889	1.27e-26	5.3858e-21
chr5:80634705-80634727	ENSG00000189127.7	chr5	80556755	80570488	-	protein_coding	ANKRD34B	303	-6.88246	0.31569	1.3e-26	5.5453e-21
chr12:7093986-7094005	ENSG00000205885.7	chr12	7108052	7122501	+	antisense	C1RL-AS1	402	357.703	0.24707	1.79e-26	7.5931e-21
chr17:43186004-43186051	ENSG00000279602.1	chr17	43360041	43361361	-	TEC	AC109326.1	399	-149.179	0.23687	4.05e-25	1.7239e-19
chr22:25448062-25448099	ENSG00000272977.1	chr22	25476218	25479971	+	sense_intronic	AL008721.2	386	113.42	0.23502	3.81e-24	1.6203e-18
chr12:9695856-9695894	ENSG00000256582.1	chr12	9704077	9709350	+	lincRNA	LINC02390	362	-12.9804	0.24441	1.04e-23	4.4317e-18
chr1:7932654-7932757	ENSG00000049247.13	chr1	7843083	7853512	-	protein_coding	UTS2	405	126.878	0.21812	2.48e-23	1.0532e-17
chr14:100344062-100344106	ENSG00000140105.17	chr14	100333788	100376805	-	protein_coding	WARS	398	2492.91	0.21352	1.91e-22	8.1066e-17
chr22:23893564-23893585	ENSG00000099974.7	chr22	23966901	23972532	+	protein_coding	DDTL	398	-20.4305	0.21254	2.45e-22	1.041e-16
chr6:30050723-30050766	ENSG00000204623.9	chr6	30001011	30061640	-	transcribed_unitary_pseudogene	ZNRD1ASP	396	90.1926	0.21136	4.19e-22	1.7843e-16
chr21:45919815-45919853	ENSG00000280604.1	chr21	45914296	45919483	+	sense_overlapping	AJ239328.1	387	-8.11354	0.21215	1.02e-21	4.3223e-16
chr22:23893564-23893585	ENSG00000272787.1	chr22	23969211	23969873	+	lincRNA	AC253536.6	398	-19.8051	0.20492	1.68e-21	7.132e-16
chr1:207320877-207320938	ENSG00000196352.15	chr1	207321376	207386804	+	protein_coding	CD55	397	-321.746	0.20052	5.65e-21	2.4045e-15
chr3:198072522-198072544	ENSG00000226435.10	chr3	198053522	198080720	-	transcribed_unprocessed_pseudogene	ANKRD18DP	402	-18.24	0.19468	1.4e-20	5.9486e-15
chr13:43882543-43882586	ENSG00000151773.12	chr13	43823909	43879727	-	protein_coding	CCDC122	385	20.2249	0.19863	3.47e-20	1.4773e-14
chr6:29677769-29677797	ENSG00000281831.1	chr6	29871895	29873783	-	lincRNA	HCP5B	354	2.33727	0.21171	6e-20	2.5527e-14
chr22:23893564-23893585	ENSG00000273295.1	chr22	23901432	23907068	-	lincRNA	AP000350.6	398	123.306	0.18148	5.6e-19	2.3832e-13
chr6:30051777-30051813	ENSG00000204622.11	chr6	30005971	30009956	+	transcribed_unprocessed_pseudogene	HLA-J	391	9.28396	0.18416	5.97e-19	2.5415e-13
chr1:7921339-7921382	ENSG00000049247.13	chr1	7843083	7853512	-	protein_coding	UTS2	396	-37.3097	0.17838	1.46e-18	6.2055e-13
chr17:43177573-43177621	ENSG00000279602.1	chr17	43360041	43361361	-	TEC	AC109326.1	362	-29.3274	0.19058	2.82e-18	1.1984e-12
chr16:66553161-66553181	ENSG00000166548.15	chr16	66508003	66552544	-	protein_coding	TK2	397	173.38	0.17396	3.85e-18	1.6381e-12
chr4:152930963-152931025	ENSG00000164144.15	chr4	152779937	152918463	+	protein_coding	ARFIP1	375	91.2543	0.18271	4.34e-18	1.847e-12
chr6:32378632-32378664	ENSG00000229391.7	chr6	32552713	32560022	-	transcribed_unprocessed_pseudogene	HLA-DRB6	317	-109.302	0.21223	4.65e-18	1.9768e-12
chr12:10010154-10010237	ENSG00000172322.13	chr12	9951316	9995694	+	protein_coding	CLEC12A	397	-749.63	0.17265	5.29e-18	2.2495e-12
chr4:119355310-119355323	ENSG00000283050.1	chr4	119407967	119454638	-	transcribed_unprocessed_pseudogene	GTF2IP12	313	65.9355	0.21239	7.29e-18	3.1022e-12
chr2:102447704-102447747	ENSG00000264764.1	chr2	102432289	102432366	+	miRNA	MIR4772	397	17.3146	0.16964	1.09e-17	4.6516e-12
chr19:58543063-58543091	ENSG00000213753.10	chr19	58573503	58599801	+	transcribed_processed_pseudogene	CENPBD1P1	400	49.5877	0.16305	4.04e-17	1.7205e-11
chr12:10010154-10010237	ENSG00000256660.5	chr12	10010627	10018619	+	protein_coding	CLEC12B	397	-44.6317	0.1633	4.99e-17	2.1248e-11
chr14:59418215-59418292	ENSG00000181619.11	chr14	59429022	59465342	-	protein_coding	GPR135	393	-3.83774	0.15984	1.62e-16	6.9117e-11
chr19:57225191-57225219	ENSG00000083844.10	chr19	57191500	57222846	+	protein_coding	ZNF264	394	66.2981	0.15878	1.91e-16	8.1312e-11
chr6:30051777-30051813	ENSG00000206503.12	chr6	29941260	29945884	+	protein_coding	HLA-A	391	3640.28	0.15673	4.02e-16	1.7098e-10
chr15:40563678-40563708	ENSG00000259536.5	chr15	40488041	40558019	+	antisense	AC091045.1	401	5.32005	0.15103	6.6e-16	2.806e-10
chr4:1690809-1690839	ENSG00000174137.12	chr4	1617915	1684302	-	protein_coding	FAM53A	400	7.87656	0.15104	7.17e-16	3.0486e-10
chr12:9695856-9695894	ENSG00000184293.7	chr12	9715860	9733299	-	protein_coding	CLECL1	362	46.3653	0.16262	1.37e-15	5.8418e-10
chr6:29677769-29677797	ENSG00000230795.3	chr6	29926459	29929232	+	unprocessed_pseudogene	HLA-K	354	-5.18798	0.16569	1.47e-15	6.2451e-10
chr9:114929875-114929920	ENSG00000181634.7	chr9	114784635	114806126	-	protein_coding	TNFSF15	405	13.46	0.14286	3.36e-15	1.4275e-09
chr3:198087448-198087498	ENSG00000226435.10	chr3	198053522	198080720	-	transcribed_unprocessed_pseudogene	ANKRD18DP	277	3.49172	0.20022	4.82e-15	2.0512e-09
chr6:29676103-29676125	ENSG00000281831.1	chr6	29871895	29873783	-	lincRNA	HCP5B	375	1.94441	0.15108	5.67e-15	2.4111e-09
chr12:48247532-48247568	ENSG00000269514.2	chr12	48198357	48230275	+	antisense	AC024257.3	394	25.3313	0.14368	6.56e-15	2.7918e-09
chr13:114141248-114141283	ENSG00000283361.2	chr13	114154691	114223084	+	protein_coding	CFAP97D2	398	-5.79671	0.14	1.13e-14	4.8162e-09
chr22:23893564-23893585	ENSG00000218537.1	chr22	23894426	23898930	-	antisense	MIF-AS1	398	25.0532	0.13865	1.55e-14	6.6041e-09
chr5:96666258-96666285	ENSG00000153113.23	chr5	96525267	96779595	+	protein_coding	CAST	402	170.471	0.1303	8.13e-14	3.4566e-08
chr2:108637100-108637146	ENSG00000135968.20	chr2	108448561	108509415	+	protein_coding	GCC2	399	-166.998	0.12993	1.1e-13	4.6601e-08
chr19:41564325-41564372	ENSG00000007129.17	chr19	41549518	41586844	+	protein_coding	CEACAM21	397	16.8844	0.12934	1.45e-13	6.1498e-08
chr12:9695856-9695894	ENSG00000284634.1	chr12	9448295	9658392	+	processed_transcript	AC092821.3	362	35.1891	0.13786	2.82e-13	1.2008e-07
chr16:70148565-70148617	ENSG00000090857.13	chr16	70113626	70162537	+	protein_coding	PDPR	312	-383.784	0.15628	4.09e-13	1.7414e-07
chr11:14302065-14302111	ENSG00000254418.1	chr11	14262846	14273691	-	antisense	SPON1-AS1	390	0.999384	0.12637	4.65e-13	1.976e-07
chr22:23630413-23630426	ENSG00000189269.12	chr22	23608452	23632321	-	protein_coding	DRICH1	398	14.313	0.12187	7.53e-13	3.2028e-07
chr6:30050723-30050766	ENSG00000066379.14	chr6	30058899	30064909	+	protein_coding	ZNRD1	396	-23.8549	0.12145	9.46e-13	4.022e-07
chr5:112878051-112878067	ENSG00000153037.14	chr5	112861188	112898371	+	protein_coding	SRP19	404	62.347	0.11348	3.54e-12	1.5071e-06
chr17:40655027-40655124	ENSG00000278834.1	chr17	40648300	40649718	+	antisense	AC073508.3	399	5.22623	0.1125	6.03e-12	2.5646e-06
chr15:43370976-43371006	ENSG00000140265.12	chr15	43358172	43371025	-	protein_coding	ZSCAN29	394	24.78	0.11349	6.53e-12	2.778e-06
chr6:30050723-30050766	ENSG00000204622.11	chr6	30005971	30009956	+	transcribed_unprocessed_pseudogene	HLA-J	396	-13.4757	0.1103	1.19e-11	5.0536e-06
chr7:27146237-27146274	ENSG00000233429.9	chr7	27095647	27100265	+	antisense	HOTAIRM1	399	-49.4884	0.10913	1.3e-11	5.5202e-06
chr7:27146237-27146274	ENSG00000005020.12	chr7	26667062	26995239	-	protein_coding	SKAP2	399	-432.801	0.10803	1.66e-11	7.0771e-06
chr7:36707832-36707866	ENSG00000136250.11	chr7	36512949	36724549	-	protein_coding	AOAH	403	724.381	0.10588	2.16e-11	9.1858e-06
chr12:48305800-48305837	ENSG00000269514.2	chr12	48198357	48230275	+	antisense	AC024257.3	395	-38.0487	0.1063	3.1e-11	1.3202e-05
chr2:95800451-95800483	ENSG00000231584.8	chr2	96010551	96023380	+	transcribed_unprocessed_pseudogene	FAHD2CP	399	-9.91879	0.1043	3.88e-11	1.6507e-05
chr13:43882543-43882586	ENSG00000274001.1	chr13	43877715	43878163	-	sense_intronic	AL512506.1	385	1.69193	0.10769	4.06e-11	1.728e-05
chr19:58543063-58543091	ENSG00000268912.1	chr19	58428632	58431148	-	lincRNA	AC012313.5	400	14.2357	0.10371	4.19e-11	1.7802e-05
chr19:35003139-35003198	ENSG00000269303.1	chr19	34998233	35000170	-	antisense	AC020907.3	391	-0.887249	0.10589	4.28e-11	1.8187e-05
chr16:69395823-69395837	ENSG00000213380.15	chr16	69320140	69339667	-	protein_coding	COG8	403	-94.3911	0.10279	4.37e-11	1.86e-05
chr3:45594779-45594844	ENSG00000244357.3	chr3	45742675	45742970	+	misc_RNA	RN7SL145P	356	0.697856	0.11381	6.35e-11	2.6993e-05
chr12:10010154-10010237	ENSG00000225231.1	chr12	9936579	9943495	-	lincRNA	LINC02470	397	-14.2578	0.099487	1.28e-10	5.4402e-05
chr15:40563678-40563708	ENSG00000166140.17	chr15	40807086	40815084	+	protein_coding	ZFYVE19	401	20.7575	0.098025	1.44e-10	6.1111e-05
chr6:29676103-29676125	ENSG00000204642.13	chr6	29722775	29738528	+	protein_coding	HLA-F	375	106.749	0.1021	2.39e-10	0.00010179
chr1:12047247-12047306	ENSG00000116688.16	chr1	11980181	12013514	+	protein_coding	MFN2	394	-95.6299	0.096757	2.76e-10	0.00011721
chr17:7113781-7113814	ENSG00000161944.16	chr17	7101322	7115700	-	protein_coding	ASGR2	398	24.0691	0.094308	3.87e-10	0.00016464
chr12:389552-389590	ENSG00000073614.12	chr12	280129	389454	-	protein_coding	KDM5A	387	234.944	0.096731	3.99e-10	0.00016975
chr12:9695856-9695894	ENSG00000214776.12	chr12	9480608	9576275	+	transcribed_unprocessed_pseudogene	AC092821.1	362	-31.0337	0.10252	4.49e-10	0.00019106
chr5:80634705-80634727	ENSG00000249655.1	chr5	80630313	80631590	-	antisense	AC008434.1	303	0.870562	0.12045	5.29e-10	0.00022507
chr11:68998217-68998249	ENSG00000132740.8	chr11	68903842	68940602	+	protein_coding	IGHMBP2	398	-6.7798	0.09243	5.89e-10	0.0002505
chr11:85968948-85968997	ENSG00000279742.1	chr11	85852557	85854943	-	TEC	AP000974.1	393	0.679866	0.091489	9.29e-10	0.00039527
chr6:30051777-30051813	ENSG00000285799.1	chr6	29849550	29885615	-	transcribed_unprocessed_pseudogene	AL645929.2	391	-14.9753	0.091207	1.09e-09	0.00046397
chr2:237908411-237908439	ENSG00000132329.10	chr2	237858893	237912114	+	protein_coding	RAMP1	388	1.37041	0.091867	1.09e-09	0.00046554
chr6:30051777-30051813	ENSG00000227766.1	chr6	29942075	29943067	-	unprocessed_pseudogene	AL671277.1	391	3.24085	0.089811	1.48e-09	0.00062991
chr12:48247532-48247568	ENSG00000257735.1	chr12	48350945	48442411	+	antisense	AC090115.1	394	1.44568	0.08865	1.66e-09	0.0007041
