# Supplementary material for: Genome-wide evaluation of the effect of short tandem repeat variation on local DNA methylation
Source: HighWire-hosted journal article supplement (doi:10.1101/gr.277057.122), 2022-12-28
Supplement: Supplemental_Table_S7.xlsx [file Supplemental_Table_S7.xlsx]

## Sheet: ST7 - Population stratification
ST 7. Population stratification of fm-mSTRs
STR coordinates, hg38	Motif	# of copies in the reference	Gene Promoter (TSS±2kb)	Gene Body	Closest Gene	Distance to Closest Gene (bp)	Refseq Genomic Feature	# of samples genotyped	Vst AFR	Vst AMR	Vst EAS	Vst EUR	Vst SAS
chr1:173204851-173204942	CT	6	TNFSF4	TNFSF4	TNFSF4	0	intron	1969	0.3494	0.0073	0.0538	0.0235	0.0431
chr2:237138882-237138916	AC	10	.	.	COPS8	38409	intergenic	1976	0.322	0.0119	0.0416	0.0325	0.0259
chr6:35415779-35415803	GT	11	.	PPARD	PPARD	0	intron	1978	0.3003	0.0061	0.0472	0.0219	0.0337
chr7:27152078-27152145	GT	4	.	HOXA-AS3	HOXA-AS3	0	intron	1983	0.306	0.0024	0.0061	0.053	0.073
chr8:42262427-42262458	ATTT	6	.	LOC101929897	LOC101929897	0	intron	1990	0.4102	0.0153	0.0598	0.0395	0.0305
chr12:79594701-79594728	GT	6	.	PAWR	PAWR	0	intron	1957	0.3497	0.0196	0.0053	0.0743	0.0361
chr17:30960701-30960756	ATTTT	4	.	.	ADAP2	1380	intergenic	1732	0.6275	0.0252	0.0753	0.0701	0.0635
chr19:14582958-14582997	GT	4	CLEC17A	.	CLEC17A	87	.	1986	0.391	0.0173	0.0661	0.0394	0.0184
chr22:25448062-25448099	CGTGG	4	CRYBB2P1	CRYBB2P1	CRYBB2P1	0	5'UTR	1875	0.3343	0.0035	0.0581	0.0515	0.0178
