# Supplementary material for: Genome-wide evaluation of the effect of short tandem repeat variation on local DNA methylation
Source: HighWire-hosted journal article supplement (doi:10.1101/gr.277057.122), 2022-12-28
Supplement: Supplemental_Table_S8.xlsx [file Supplemental_Table_S8.xlsx]

## Sheet: ST8 - Human traits
ST 8. Relevant fm-mSTR in human traits and disease
STR coordinates, hg38	Motif	Gene Promoter (TSS±2kb)	Gene Body	Closest Gene	Distance to Closest Gene (bp)	Genomic Feature	Tagging SNV coordinates, hg38	Ref	Alt	P-value STR:SNV	r2 STR:SNV	Distance STR:SNV (bp)	MAF tagging SNV	GWAS trait	GWAS gene	GWAS P-value
chr1:207320877-207320938	CG/AC	CD55	.	CD55	740	.	207282076	T	G	2.15944e-97	0.838496	38831.5	0.2725	Refractive error	SRGAP2, C4BPA, CD55, CR2, CR1, CR1L, CD46, CD34, PLXNA2	2e-54
chr1:207320877-207320938	CG/AC	CD55	.	CD55	740	.	207282076	T	G	2.15944e-97	0.838496	38831.5	0.2725	Spherical equivalent	.	1e-19
chr1:207320877-207320938	CG/AC	CD55	.	CD55	740	.	207314659	G	C	1.22705e-124	0.903078	6248.5	0.2878	Spherical equivalent or myopia (age of diagnosis)	C4BPA, CD55	3e-13
chr1:207320877-207320938	CG/AC	CD55	.	CD55	740	.	207316974	A	G	9.57993e-112	0.878283	3933.5	0.2593	Spherical equivalent (joint analysis main effects and education interaction)	CD55	3e-12
chr1:207320877-207320938	CG/AC	CD55	.	CD55	740	.	207282076	T	G	2.15944e-97	0.838496	38831.5	0.2725	Spherical equivalent	.	6e-12
chr1:207320877-207320938	CG/AC	CD55	.	CD55	740	.	207316974	A	G	9.57993e-112	0.878283	3933.5	0.2593	Spherical equivalent (joint analysis main effects and education interaction)	CD55	2e-08
chr1:21449921-21449955	ATTG	.	NBPF3	NBPF3	0	intron	21468895	A	G	1.12562e-122	0.898435	18957	0.4571	Serum alkaline phosphatase levels	.	2e-106
chr1:231373670-231373715	GT	.	EGLN1	EGLN1	0	intron	231359570	A	G	4.05971e-126	0.904847	14122.5	0.4429	Hematocrit	EGLN1, SPRTN	3e-31
chr1:231373670-231373715	GT	.	EGLN1	EGLN1	0	intron	231359570	A	G	4.05971e-126	0.904847	14122.5	0.4429	Hemoglobin	EGLN1, SPRTN	2e-25
chr1:231373670-231373715	GT	.	EGLN1	EGLN1	0	intron	231385128	C	T	7.51489e-172	0.959994	11435.5	0.4408	Cutaneous mastocytosis	EGLN1	8e-07
chr10:103900688-103900745	CT/AC/CT	.	STN1	STN1	0	intron	103891899	G	T	2.45816e-78	0.930589	8817.5	0.3074	Chronic obstructive pulmonary disease or resting heart rate (pleiotropy)	OBFC1, SH3PXD2A	2e-10
chr10:103900688-103900745	CT/AC/CT	.	STN1	STN1	0	intron	103856724	A	T	6.11335e-67	0.894948	43992.5	0.3286	Stroke	SH3PXD2A	2e-10
chr10:103900688-103900745	CT/AC/CT	.	STN1	STN1	0	intron	103836883	G	C	1.40504e-60	0.869091	63833.5	0.3265	Ischemic stroke	.	1e-09
chr10:103900688-103900745	CT/AC/CT	.	STN1	STN1	0	intron	103840012	T	G	5.81798e-52	0.823649	60704.5	0.3327	Brain morphology (MOSTest)	SH3PXD2A, OBFC1	1e-08
chr10:103900688-103900745	CT/AC/CT	.	STN1	STN1	0	intron	103897116	G	A	3.06748e-74	0.918394	3600.5	0.3082	Chronic obstructive pulmonary disease	STN1	2e-08
chr10:103900688-103900745	CT/AC/CT	.	STN1	STN1	0	intron	103850568	G	A	6.11335e-67	0.894948	50148.5	0.3265	Brain region volumes	.	2e-08
chr10:103900688-103900745	CT/AC/CT	.	STN1	STN1	0	intron	103856724	A	T	6.11335e-67	0.894948	43992.5	0.3286	Stroke	SH3PXD2A	1e-07
chr10:103900688-103900745	CT/AC/CT	.	STN1	STN1	0	intron	103856724	A	T	6.11335e-67	0.894948	43992.5	0.3286	Ischemic stroke	SH3PXD2A	2e-07
chr10:103900688-103900745	CT/AC/CT	.	STN1	STN1	0	intron	103904701	A	T	1.26768e-59	0.864693	3984.5	0.3041	Sub-cortical grey matter volume	OBFC1	8e-07
chr10:103900688-103900745	CT/AC/CT	.	STN1	STN1	0	intron	103856724	A	T	6.11335e-67	0.894948	43992.5	0.3286	Ischemic stroke (small-vessel)	SH3PXD2A	4e-06
chr10:13503713-13503738	AAAC	BEND7	BEND7	BEND7	0	intron	13490648	C	T	3.32959e-112	0.876154	13077.5	0.3204	Smoking initiation (ever regular vs never regular) (MTAG)	.	2e-13
chr10:13503713-13503738	AAAC	BEND7	BEND7	BEND7	0	intron	13490648	C	T	3.32959e-112	0.876154	13077.5	0.3204	Age of smoking initiation (MTAG)	.	3e-10
chr10:13503713-13503738	AAAC	BEND7	BEND7	BEND7	0	intron	13507462	G	C	1.30855e-111	0.874752	3736.5	0.3245	Smoking status (ever vs never smokers)	BEND7	1e-08
chr10:13503713-13503738	AAAC	BEND7	BEND7	BEND7	0	intron	13495204	G	A	1.51638e-111	0.875672	8521.5	0.3217	Smoking status	.	2e-08
chr10:13503713-13503738	AAAC	BEND7	BEND7	BEND7	0	intron	13491053	C	T	2.5033e-145	0.934613	12672.5	0.3279	Smoking initiation (ever regular vs never regular)	.	3e-08
chr12:124861877-124861894	AC	SCARB1	SCARB1	SCARB1	0	intron	124861097	G	A	1.57433e-89	0.809732	788.5	0.3327	HDL cholesterol levels x short total sleep time interaction (2df test)	MMAB	5e-14
chr12:124861877-124861894	AC	SCARB1	SCARB1	SCARB1	0	intron	124865774	G	A	3.69384e-104	0.856921	3888.5	0.3463	HDL cholesterol levels x long total sleep time interaction (2df test)	SBNO1	2e-13
chr12:48106707-48106725	AAAC	SENP1	PFKM	PFKM	0	intron	48138134	T	A	2.6241e-100	0.844857	31418	0.3367	Smoking initiation (ever regular vs never regular) (MTAG)	.	6e-10
chr12:50505002-50505022	N/A	.	DIP2B	DIP2B	0	5utr	50512307	A	G	2.69774e-90	0.815062	7295	0.252	Plateletcrit	DIP2B	3e-36
chr12:50505002-50505022	N/A	.	DIP2B	DIP2B	0	5utr	50661925	C	T	3.65092e-89	0.809717	156913	0.2469	LDL cholesterol	DIP2B	3e-12
chr12:50505002-50505022	N/A	.	DIP2B	DIP2B	0	5utr	50666567	C	T	3.65092e-89	0.809717	161555	0.2469	Fibrinogen levels	DIP2B	9e-12
chr12:50505002-50505022	N/A	.	DIP2B	DIP2B	0	5utr	50661925	C	T	3.65092e-89	0.809717	156913	0.2469	Fibrinogen levels	DIP2B	3e-11
chr14:100344062-100344106	CCCTCT	.	WARS	WARS	0	intron	100346740	T	C	8.44706e-105	0.85751	2656	0.2612	Blood protein levels	WARS	7e-18
chr14:100344062-100344106	CCCTCT	.	WARS	WARS	0	intron	100330918	C	A	9.5893e-108	0.865239	13166	0.2633	Total testosterone levels	.	5e-14
chr14:100344062-100344106	CCCTCT	.	WARS	WARS	0	intron	100339246	T	C	3.19605e-91	0.817018	4838	0.2561	Total testosterone levels	.	1e-08
chr15:58750646-58750679	GT	ADAM10	.	ADAM10	940	.	58753575	A	G	5.27115e-97	0.834843	2912.5	0.349	Alzheimer's disease or family history of Alzheimer's disease	.	6e-11
chr15:58750646-58750679	GT	ADAM10	.	ADAM10	940	.	58753575	A	G	5.27115e-97	0.834843	2912.5	0.349	Alzheimer's disease (late onset)	ADAM10	7e-09
chr15:58750646-58750679	GT	ADAM10	.	ADAM10	940	.	58693705	A	T	5.71244e-99	0.840876	56957.5	0.3531	Schizophrenia	ADAM10	4e-08
chr15:58750646-58750679	GT	ADAM10	.	ADAM10	940	.	58693705	A	T	5.71244e-99	0.840876	56957.5	0.3531	Schizophrenia	intergenic	8e-08
chr15:58750646-58750679	GT	ADAM10	.	ADAM10	940	.	58753575	A	G	5.27115e-97	0.834843	2912.5	0.349	Family history of Alzheimer's disease	.	5e-06
chr15:58750646-58750679	GT	ADAM10	.	ADAM10	940	.	58693705	A	T	5.71244e-99	0.840876	56957.5	0.3531	Schizophrenia	ADAM10	8e-06
chr15:74204941-74204964	AAAG	STRA6	STRA6	STRA6	0	intron	74205575	T	A	5.16605e-189	0.971939	622.5	0.3429	Height	.	3e-09
chr15:78434345-78434369	AC	.	.	IREB2	3062	.	78458207	G	A	1.64399e-103	0.853988	23850	0.3265	Post bronchodilator FEV1	IREB2	1e-12
chr15:78434345-78434369	AC	.	.	IREB2	3062	.	78458207	G	A	1.64399e-103	0.853988	23850	0.3265	Post bronchodilator FEV1/FVC ratio	IREB2	4e-10
chr15:78434345-78434369	AC	.	.	IREB2	3062	.	78458207	G	A	1.64399e-103	0.853988	23850	0.3265	Pre bronchodilator FEV1	IREB2	1e-07
chr15:78434345-78434369	AC	.	.	IREB2	3062	.	78458207	G	A	1.64399e-103	0.853988	23850	0.3265	Post bronchodilator FEV1 in COPD	IREB2	7e-07
chr15:78434345-78434369	AC	.	.	IREB2	3062	.	78458207	G	A	1.64399e-103	0.853988	23850	0.3265	Post bronchodilator FEV1/FVC ratio in COPD	IREB2	3e-06
chr16:28152075-28152089	GT	.	XPO6	XPO6	0	intron	28082353	C	T	2.20583e-98	0.839098	69729	0.4041	Lymphocyte counts	.	8e-13
chr16:28152075-28152089	GT	.	XPO6	XPO6	0	intron	28082353	C	T	2.20583e-98	0.839098	69729	0.4041	White blood cell count	.	4e-11
chr16:57539821-57539835	AT	.	.	ADGRG5	2808	.	57536650	C	T	3.30659e-96	0.83233	3178	0.3143	Platelet count	.	3e-14
chr16:57539821-57539835	AT	.	.	ADGRG5	2808	.	57536792	A	G	5.39085e-156	0.945974	3036	0.3245	Mean corpuscular hemoglobin	.	2e-12
chr16:57539821-57539835	AT	.	.	ADGRG5	2808	.	57545054	G	A	1.75976e-147	0.936517	5226	0.3347	Mean corpuscular hemoglobin	GPR114	8e-12
chr16:57539821-57539835	AT	.	.	ADGRG5	2808	.	57539817	C	A	3.60056e-155	0.945778	11	0.3258	Basophil count	.	1e-11
chr16:57539821-57539835	AT	.	.	ADGRG5	2808	.	57536649	G	T	3.30659e-96	0.83233	3179	0.3143	Basophil count	.	2e-11
chr16:57539821-57539835	AT	.	.	ADGRG5	2808	.	57546317	G	A	2.81736e-91	0.817208	6489	0.3135	Plateletcrit	GPR114	3e-11
chr16:57539821-57539835	AT	.	.	ADGRG5	2808	.	57545054	G	A	1.75976e-147	0.936517	5226	0.3347	Mean corpuscular volume	GPR114	7e-11
chr16:57539821-57539835	AT	.	.	ADGRG5	2808	.	57545054	G	A	1.75976e-147	0.936517	5226	0.3347	Mean corpuscular volume	.	7e-11
chr16:57539821-57539835	AT	.	.	ADGRG5	2808	.	57539817	C	A	3.60056e-155	0.945778	11	0.3258	Mean corpuscular volume	.	9e-11
chr16:57539821-57539835	AT	.	.	ADGRG5	2808	.	57545054	G	A	1.75976e-147	0.936517	5226	0.3347	Mean reticulocyte volume	GPR114	1e-10
chr16:57539821-57539835	AT	.	.	ADGRG5	2808	.	57533712	C	T	9.95368e-89	0.808135	6116	0.3094	Red blood cell count	.	3e-08
chr16:69395823-69395837	AT	.	.	TERF2	9817	.	69373083	A	G	1.17783e-87	0.80286	22747	0.2816	Leukocyte telomere length	TERF2	5e-10
chr17:17665380-17665400	AC	.	.	SMCR2	8627	.	17669873	C	G	8.38654e-87	0.802312	4483	0.4877	Sunburns	.	6e-12
chr17:43166135-43166177	GT/CT	.	LOC101929767	LOC101929767	0	intron	43093449	G	A	3.19556e-129	0.912948	72707	0.3816	Menopause (age at onset)	BRCA1	8e-11
chr17:43166135-43166177	GT/CT	.	LOC101929767	LOC101929767	0	intron	43093449	G	A	3.19556e-129	0.912948	72707	0.3816	Menarche (age at onset)	.	3e-08
chr17:43166135-43166177	GT/CT	.	LOC101929767	LOC101929767	0	intron	43324652	C	T	5.24648e-94	0.830233	83847	0.3709	Blood protein levels	TMEM106A	9e-08
chr17:46278367-46278422	GTTTT	.	ARL17B	ARL17B	0	intron	46168400	G	A	4.96258e-102	0.903627	109994	0.195	Brain morphology (MOSTest)	KIF18B, C1QL1, DCAKD, NMT1, PLCD3, ACBD4, HEXIM1, HEXIM2, ARHGAP27, PLEKHM1, CRHR1, SPPL2C, MAPT, STH, KANSL1, ARL17B, LRRC37A, LRRC37A2, ARL17A, NSF, WNT3	2e-65
chr17:46278367-46278422	GTTTT	.	ARL17B	ARL17B	0	intron	46254985	A	G	1.60131e-103	0.909169	23409.5	0.2	Hematocrit	RP11-259G18.3	2e-55
chr17:46278367-46278422	GTTTT	.	ARL17B	ARL17B	0	intron	46254985	A	G	1.60131e-103	0.909169	23409.5	0.2	Hemoglobin	RP11-259G18.3	6e-48
chr17:46278367-46278422	GTTTT	.	ARL17B	ARL17B	0	intron	46211866	G	T	4.96258e-102	0.903627	66528.5	0.1963	Macular thickness	KANSL1	3e-35
chr17:46278367-46278422	GTTTT	.	ARL17B	ARL17B	0	intron	46130566	A	G	3.78159e-100	0.898118	147828	0.1926	Neurociticism	.	1e-30
chr17:46278367-46278422	GTTTT	.	ARL17B	ARL17B	0	intron	46286563	C	T	6.4569e-105	0.913207	8168.5	0.1674	Neurociticism	.	4e-29
chr17:46278367-46278422	GTTTT	.	ARL17B	ARL17B	0	intron	46115591	T	C	1.18218e-102	0.903881	162804	0.1934	Feeling hurt	.	3e-28
chr17:46278367-46278422	GTTTT	.	ARL17B	ARL17B	0	intron	46240818	A	G	3.74804e-103	0.903857	37576.5	0.1959	Feeling hurt	.	1e-26
chr17:46278367-46278422	GTTTT	.	ARL17B	ARL17B	0	intron	46274021	C	T	1.31667e-111	0.923951	4373.5	0.1899	Neuroticism	intergenic	2e-23
chr17:46278367-46278422	GTTTT	.	ARL17B	ARL17B	0	intron	46208165	G	A	2.50532e-102	0.905433	70229.5	0.1797	Alcohol consumption (drinks per week)	KIAA1267	2e-22
chr17:46278367-46278422	GTTTT	.	ARL17B	ARL17B	0	intron	46086957	G	A	4.96258e-102	0.903627	191438	0.1975	Alcohol consumption (drinks per week) (MTAG)	.	7e-21
chr17:46278367-46278422	GTTTT	.	ARL17B	ARL17B	0	intron	46049307	A	G	1.31324e-73	0.902335	229088	0.2553	Experiencing mood swings	.	4e-19
chr17:46278367-46278422	GTTTT	.	ARL17B	ARL17B	0	intron	46279985	T	C	8.05923e-106	0.90961	1590.5	0.1942	Experiencing mood swings	.	1e-18
chr17:46278367-46278422	GTTTT	.	ARL17B	ARL17B	0	intron	46171403	T	C	1.36372e-102	0.903743	106992	0.1929	Experiencing mood swings	.	1e-18
chr17:46278367-46278422	GTTTT	.	ARL17B	ARL17B	0	intron	46115252	A	G	1.02805e-100	0.89828	163142	0.1939	Reticulocyte count	KANSL1	1e-17
chr17:46278367-46278422	GTTTT	.	ARL17B	ARL17B	0	intron	46115202	C	T	5.81476e-72	0.802242	163192	0.1824	Feeling fed-up	ACBD4	1e-17
chr17:46278367-46278422	GTTTT	.	ARL17B	ARL17B	0	intron	46115252	A	G	1.02805e-100	0.89828	163142	0.1939	High light scatter reticulocyte count	KANSL1	2e-16
chr17:46278367-46278422	GTTTT	.	ARL17B	ARL17B	0	intron	46287283	C	T	4.5514e-105	0.911328	8888.5	0.1804	Feeling fed-up	.	2e-15
chr17:46278367-46278422	GTTTT	.	ARL17B	ARL17B	0	intron	46269852	C	A	6.50416e-103	0.914583	8542.5	0.1798	Feeling nervous	.	3e-15
chr17:46278367-46278422	GTTTT	.	ARL17B	ARL17B	0	intron	46115224	T	A	1.02805e-100	0.89828	163170	0.1939	Lung function (FEV1)	KANSL1	1e-13
chr17:46278367-46278422	GTTTT	.	ARL17B	ARL17B	0	intron	46258269	G	A	8.46894e-97	0.897216	20125.5	0.1894	White matter microstructure (radial diusivities)	.	4e-13
chr17:46278367-46278422	GTTTT	.	ARL17B	ARL17B	0	intron	46112492	G	A	2.25658e-95	0.902304	165902	0.2052	Lymphocyte percentage of white cells	KANSL1	5e-13
chr17:46278367-46278422	GTTTT	.	ARL17B	ARL17B	0	intron	46115224	T	A	1.02805e-100	0.89828	163170	0.1939	Lung function (FVC)	KANSL1	7e-13
chr17:46278367-46278422	GTTTT	.	ARL17B	ARL17B	0	intron	46249498	A	G	2.31111e-97	0.903424	28896.5	0.1597	Physical activity (overall physical activity time)	KANSL1-AS1	3e-12
chr17:46278367-46278422	GTTTT	.	ARL17B	ARL17B	0	intron	46115591	T	C	1.18218e-102	0.903881	162804	0.1934	Irritable mood	.	4e-12
chr17:46278367-46278422	GTTTT	.	ARL17B	ARL17B	0	intron	46115557	A	G	3.84485e-89	0.869765	162838	0.1996	Feeling miserable	.	4e-12
chr17:46278367-46278422	GTTTT	.	ARL17B	ARL17B	0	intron	46277183	C	G	2.5265e-113	0.933714	1211.5	0.1549	Irritable mood	.	5e-12
chr17:46278367-46278422	GTTTT	.	ARL17B	ARL17B	0	intron	46106037	A	G	4.28904e-102	0.903769	172358	0.1955	Cognitive aspects of educational attainment	.	2e-11
chr17:46278367-46278422	GTTTT	.	ARL17B	ARL17B	0	intron	46274021	C	T	1.31667e-111	0.923951	4373.5	0.1899	Feeling miserable	.	3e-11
chr17:46278367-46278422	GTTTT	.	ARL17B	ARL17B	0	intron	46072786	A	T	3.74804e-103	0.903857	205608	0.1959	Household income	KANSL1	3e-11
chr17:46278367-46278422	GTTTT	.	ARL17B	ARL17B	0	intron	46192180	C	T	1.36372e-102	0.903743	86214.5	0.1942	Household income	KANSL1	5e-11
chr17:46278367-46278422	GTTTT	.	ARL17B	ARL17B	0	intron	46279427	A	G	9.61593e-98	0.89226	1032.5	0.1929	White matter microstructure (fractional anisotropy)	.	5e-11
chr17:46278367-46278422	GTTTT	.	ARL17B	ARL17B	0	intron	46262107	A	G	1.71731e-104	0.911225	16287.5	0.1853	Lung function in never smokers (low FEV1 vs high FEV1)	KANSL1	2e-10
chr17:46278367-46278422	GTTTT	.	ARL17B	ARL17B	0	intron	46245594	A	G	1.71363e-95	0.900133	32800.5	0.1711	General factor of neuroticism	ENSG00000262500	2e-10
chr17:46278367-46278422	GTTTT	.	ARL17B	ARL17B	0	intron	46206691	C	T	2.16248e-102	0.905575	71703.5	0.1803	Feeling worry	.	6e-10
chr17:46278367-46278422	GTTTT	.	ARL17B	ARL17B	0	intron	46233741	G	C	4.30052e-97	0.908792	44653.5	0.1512	Cancer (pleiotropy)	.	1e-09
chr17:46278367-46278422	GTTTT	.	ARL17B	ARL17B	0	intron	46128324	C	T	9.99682e-81	0.838512	150070	0.2041	Feeling guilty	.	5e-09
chr17:46278367-46278422	GTTTT	.	ARL17B	ARL17B	0	intron	46110126	A	G	3.74804e-103	0.903857	168268	0.1947	Parkinson's disease	MAPT	8e-09
chr17:46278367-46278422	GTTTT	.	ARL17B	ARL17B	0	intron	46267622	C	G	4.45386e-104	0.911463	10772.5	0.1867	Loneliness	RP11-259G18.1	3e-08
chr17:46278367-46278422	GTTTT	.	ARL17B	ARL17B	0	intron	46084104	A	C	1.36372e-102	0.903743	194290	0.1967	White matter microstructure (fractional anisotropy)	.	4e-08
chr17:46278367-46278422	GTTTT	.	ARL17B	ARL17B	0	intron	46236391	G	A	1.36372e-102	0.903743	42003.5	0.1955	Osteoarthrosis (time to event)	KANSL1, LRRC37A	4e-08
chr17:46278367-46278422	GTTTT	.	ARL17B	ARL17B	0	intron	46278236	A	G	2.05456e-93	0.880853	158.5	0.1942	Feeling guilty	.	4e-08
chr19:35003139-35003198	GT/AG	.	GRAMD1A	GRAMD1A	0	intron	34997029	C	G	2.96999e-87	0.801355	6139.5	0.3122	White blood cell count	.	2e-14
chr19:35003139-35003198	GT/AG	.	GRAMD1A	GRAMD1A	0	intron	34997029	C	G	2.96999e-87	0.801355	6139.5	0.3122	White blood cell count	.	5e-13
chr2:102447704-102447747	ATTT/ATGT	.	IL18RAP	IL18RAP	0	intron	102457814	G	T	1.45346e-92	0.820356	10088.5	0.2735	Blood protein levels	IL18R1, IL18RAP, AC007278.3, SLC9A4, AC007248.7, AC007278.2, MIR4772	1e-24
chr2:102447704-102447747	ATTT/ATGT	.	IL18RAP	IL18RAP	0	intron	102471181	C	T	3.21758e-91	0.815722	23455.5	0.2714	Basophil count	SLC9A4	5e-12
chr2:102447704-102447747	ATTT/ATGT	.	IL18RAP	IL18RAP	0	intron	102460685	A	G	5.47796e-90	0.854933	12959.5	0.316	Blood protein levels	IL18RAP	2e-07
chr2:26178879-26178913	AGGCGG	GAREM2	GAREM2	GAREM2	0	intron	26177909	C	G	2.77473e-92	0.837367	987	0.2951	Red cell distribution width	.	3e-10
chr2:26178879-26178913	AGGCGG	GAREM2	GAREM2	GAREM2	0	intron	26176345	G	A	1.66562e-117	0.901039	2551	0.302	Red cell distribution width	.	5e-09
chr2:28910665-28910695	GT/AT	.	WDR43	WDR43	0	intron	28897867	C	T	3.52243e-112	0.883548	12813	0.2551	Breast cancer (estrogen-receptor negative)	WDR43	2e-09
chr2:28910665-28910695	GT/AT	.	WDR43	WDR43	0	intron	28896719	A	T	1.38775e-114	0.888883	13961	0.2469	Breast cancer	WDR43	5e-09
chr2:28910665-28910695	GT/AT	.	WDR43	WDR43	0	intron	28896719	A	T	1.38775e-114	0.888883	13961	0.2469	Breast cancer (estrogen-receptor negative)	WDR43	3e-06
chr20:31807738-31807823	CT/AT/GT/AT	.	.	TPX2	5939	.	31737952	C	A	1.25367e-85	0.838996	69828.5	0.2143	Red blood cell count	.	1e-28
chr20:31807738-31807823	CT/AT/GT/AT	.	.	TPX2	5939	.	31737952	C	A	1.25367e-85	0.838996	69828.5	0.2143	Red blood cell count	.	3e-26
chr20:31807738-31807823	CT/AT/GT/AT	.	.	TPX2	5939	.	31737952	C	A	1.25367e-85	0.838996	69828.5	0.2143	Red blood cell count	.	8e-22
chr20:31807738-31807823	CT/AT/GT/AT	.	.	TPX2	5939	.	31718921	T	C	1.94305e-85	0.838327	88859.5	0.3	Putamen volume	.	4e-18
chr20:31807738-31807823	CT/AT/GT/AT	.	.	TPX2	5939	.	31666970	T	G	1.94305e-85	0.838327	140810	0.3	Brain region volumes	.	2e-16
chr20:31807738-31807823	CT/AT/GT/AT	.	.	TPX2	5939	.	31666970	T	G	1.94305e-85	0.838327	140810	0.3	Brain region volumes	.	3e-15
chr20:31807738-31807823	CT/AT/GT/AT	.	.	TPX2	5939	.	31666970	T	G	1.94305e-85	0.838327	140810	0.3	Brain region volumes	.	2e-14
chr20:31807738-31807823	CT/AT/GT/AT	.	.	TPX2	5939	.	31701236	C	T	4.12723e-82	0.826162	106544	0.298	Lung function (FVC)	.	5e-14
chr20:31807738-31807823	CT/AT/GT/AT	.	.	TPX2	5939	.	31666970	T	G	1.94305e-85	0.838327	140810	0.3	Brain region volumes	.	1e-13
chr20:31807738-31807823	CT/AT/GT/AT	.	.	TPX2	5939	.	31718921	T	C	1.94305e-85	0.838327	88859.5	0.3	Subcortical brain region volumes	BCL2L1	1e-12
chr20:31807738-31807823	CT/AT/GT/AT	.	.	TPX2	5939	.	31718921	T	C	1.94305e-85	0.838327	88859.5	0.3	Caudate nucleus volume	.	4e-12
chr20:31807738-31807823	CT/AT/GT/AT	.	.	TPX2	5939	.	31718921	T	C	1.94305e-85	0.838327	88859.5	0.3	Putamen volume	BCL2L1	2e-09
chr20:31807738-31807823	CT/AT/GT/AT	.	.	TPX2	5939	.	31718921	T	C	1.94305e-85	0.838327	88859.5	0.3	Pallidum volume	.	6e-09
chr20:31807738-31807823	CT/AT/GT/AT	.	.	TPX2	5939	.	31806714	A	C	1.25367e-85	0.838996	1066.5	0.2143	Oppositional defiant disorder dimensions in attention-deficit hyperactivity disorder	BCL2L1, COX4I2, TPX2, MYLK2, TTLL9, FOXS1	3e-06
chr20:31807738-31807823	CT/AT/GT/AT	.	.	TPX2	5939	.	31706231	G	A	4.57872e-83	0.829744	101550	0.2184	Oppositional defiant disorder dimensions in attention-deficit hyperactivity disorder	BCL2L1, COX4I2, TPX2, MYLK2, TTLL9, FOXS1	4e-06
chr21:45479602-45479617	AC	.	COL18A1	COL18A1	0	intron	45482059	A	C	1.24751e-99	0.847654	2449.5	0.2265	Blood protein levels	.	1e-19
chr21:45479602-45479617	AC	.	COL18A1	COL18A1	0	intron	45479365	A	G	9.14601e-140	0.96823	244.5	0.2566	Apolipoprotein A1 levels	COL18A1	8e-14
chr21:45479602-45479617	AC	.	COL18A1	COL18A1	0	intron	45479365	A	G	9.14601e-140	0.96823	244.5	0.2566	HDL cholesterol levels	COL18A1	1e-11
chr3:195759919-195759939	AC	.	MUC4	MUC4	0	intron	195758569	A	G	9.57227e-156	0.961153	1360	0.3091	Lung disease severity in cystic fibrosis	MUC4, MUC20	3e-11
chr3:195759919-195759939	AC	.	MUC4	MUC4	0	intron	195758569	A	G	9.57227e-156	0.961153	1360	0.3091	Lung disease severity in cystic fibrosis	MUC4, MUC20	8e-11
chr3:195759919-195759939	AC	.	MUC4	MUC4	0	intron	195758569	A	G	9.57227e-156	0.961153	1360	0.3091	Lung disease severity in cystic fibrosis	MUC4, MUC20	2e-07
chr3:52790264-52790292	ATTC	.	ITIH1	ITIH1	0	intron	52788905	C	T	4.64454e-103	0.852735	1373	0.3776	Waist circumference adjusted for body mass index	ITIH1	3e-10
chr3:52790264-52790292	ATTC	.	ITIH1	ITIH1	0	intron	52788905	C	T	4.64454e-103	0.852735	1373	0.3776	Waist circumference adjusted for BMI (joint analysis main effects and physical activity interaction)	ITIH1	1e-08
chr3:52790264-52790292	ATTC	.	ITIH1	ITIH1	0	intron	52788905	C	T	4.64454e-103	0.852735	1373	0.3776	Waist circumference adjusted for BMI in active individuals	ITIH1	1e-06
chr4:1690809-1690839	AC	.	.	SLBP	1892	.	1732512	T	C	3.89723e-120	0.89343	41688	0.2367	Bladder cancer	TMEM129, TACC3, FGFR3	7e-25
chr4:1690809-1690839	AC	.	.	SLBP	1892	.	1732512	T	C	3.89723e-120	0.89343	41688	0.2367	Bladder cancer	TMEM129, TACC3, FGFR3	4e-13
chr4:1690809-1690839	AC	.	.	SLBP	1892	.	1732512	T	C	3.89723e-120	0.89343	41688	0.2367	Urinary bladder cancer	TMEM129, SLBP, TACC3, FGFR3	1e-11
chr4:1690809-1690839	AC	.	.	SLBP	1892	.	1683484	T	C	2.71794e-94	0.826139	7340	0.2367	Osteoarthritis	.	2e-09
chr4:38403256-38403286	GT	.	.	LINC01258	17376	.	38393894	G	C	2.34637e-81	0.81027	9377	0.4612	Medication use (diuretics)	RP11-83C7.1	8e-10
chr5:132485807-132485850	CT/AC	.	IRF1	IRF1	0	intron	132488794	A	C	2.95919e-100	0.844703	2965.5	0.3673	Platelet count	.	3e-54
chr5:132485807-132485850	CT/AC	.	IRF1	IRF1	0	intron	132488794	A	C	2.95919e-100	0.844703	2965.5	0.3673	Platelet count	.	3e-51
chr5:132485807-132485850	CT/AC	.	IRF1	IRF1	0	intron	132488794	A	C	2.95919e-100	0.844703	2965.5	0.3673	Platelet count	IRF1	7e-19
chr5:132485807-132485850	CT/AC	.	IRF1	IRF1	0	intron	132479312	C	A	3.69138e-91	0.818087	6516.5	0.3601	Diastolic blood pressure	C5orf56, IRF1	9e-10
chr5:132485807-132485850	CT/AC	.	IRF1	IRF1	0	intron	132478399	C	G	7.50059e-94	0.825941	7429.5	0.3566	Cardiovascular disease	.	2e-09
chr5:132485807-132485850	CT/AC	.	IRF1	IRF1	0	intron	132477658	T	C	2.24511e-90	0.812755	8170.5	0.3592	Hay fever and/or eczema	.	5e-09
chr5:151787897-151787947	GT/AG	.	G3BP1	G3BP1	0	intron	151746763	G	T	2.15465e-97	0.836054	41159	0.1939	Red cell distribution width	.	7e-11
chr5:151787897-151787947	GT/AG	.	G3BP1	G3BP1	0	intron	151805140	C	T	3.08319e-105	0.858686	17218	0.198	Preschool internalizing problems	.	8e-06
chr5:154672582-154672615	ATTT	.	.	LARP1	10364	.	154668645	G	A	2.54899e-122	0.897749	3953.5	0.1204	Mean corpuscular hemoglobin	.	1e-27
chr5:154672582-154672615	ATTT	.	.	LARP1	10364	.	154669125	C	A	9.12028e-122	0.897637	3473.5	0.1209	Mean corpuscular volume	.	2e-16
chr5:154672582-154672615	ATTT	.	.	LARP1	10364	.	154671354	C	T	7.12266e-117	0.886637	1244.5	0.1143	Mean corpuscular hemoglobin concentration	MIR3141, MIR1303	2e-13
chr5:154672582-154672615	ATTT	.	.	LARP1	10364	.	154671354	C	T	7.12266e-117	0.886637	1244.5	0.1143	Mean corpuscular hemoglobin concentration	.	6e-13
chr5:171742304-171742340	AC	.	.	SMIM23	43532	.	171743637	C	A	1.37599e-121	0.896321	1315	0.2061	Hepatitis	intergenic	1e-08
chr5:76912825-76912915	AG	.	S100Z	S100Z	0	intron	76874849	A	T	1.56939e-87	0.803716	38021	0.3429	Blood protein levels	CRHBP	3e-79
chr6:127374990-127375016	AAAT	.	.	ECHDC1	31382	.	127353517	T	C	1.21062e-92	0.820626	21486	0.2816	Mean corpuscular volume	.	5e-14
chr6:127374990-127375016	AAAT	.	.	ECHDC1	31382	.	127350487	A	C	3.73308e-89	0.808376	24516	0.2714	Mean corpuscular volume	.	4e-13
chr6:127374990-127375016	AAAT	.	.	ECHDC1	31382	.	127361895	G	A	9.07375e-91	0.814144	13108	0.2837	Mean reticulocyte volume	RPL5P18	2e-11
chr6:127374990-127375016	AAAT	.	.	ECHDC1	31382	.	127279485	G	A	8.80311e-94	0.824451	95518	0.2755	Breast cancer	ECHDC1, RNF146	3e-08
chr6:133889312-133889377	CT	TARID	TCF21	TCF21	0	5utr	133913649	A	G	1.23563e-91	0.817167	24304.5	0.2224	Hemoglobin concentration	.	1e-14
chr6:29676103-29676125	GT	.	ZFP57	ZFP57	0	intron	29678388	C	T	2.59467e-187	0.970154	2274	0.2898	Blood protein levels	.	3e-10
chr6:30000958-30000984	AAGG	.	.	ZNRD1ASP	27	.	30049294	T	C	5.54179e-93	0.821775	48323	0.1469	Lipid metabolism phenotypes	PPP1R11	3e-29
chr6:30000958-30000984	AAGG	.	.	ZNRD1ASP	27	.	30049294	T	C	5.54179e-93	0.821775	48323	0.1469	Interleukin-1-beta levels	HLA	2e-12
chr6:30000958-30000984	AAGG	.	.	ZNRD1ASP	27	.	30046110	C	T	2.05288e-95	0.829794	45139	0.151	Interleukin-1-beta levels	HLA	1e-09
chr6:30000958-30000984	AAGG	.	.	ZNRD1ASP	27	.	30002812	T	G	3.01713e-142	0.929899	1841	0.1755	HIV-1 control	HLA-A, ZNRD1, RNF39	2e-08
chr6:30000958-30000984	AAGG	.	.	ZNRD1ASP	27	.	30071463	G	T	3.01713e-142	0.929899	70492	0.1755	Nonobstructive coronary artery disease	RNF39	7e-07
chr6:30444023-30444073	AG	.	.	HLA-E	45436	.	30430613	G	A	2.31716e-188	0.971587	13435	0.1646	Educational attainment (MTAG)	Intergenic	6e-12
chr6:42959499-42959540	AG	GNMT	CNPY3-GNMT	CNPY3-GNMT	0	intron	42951484	T	C	4.19514e-144	0.933072	8035.5	0.377	Apolipoprotein B levels	GNMT	3e-21
chr6:42959499-42959540	AG	GNMT	CNPY3-GNMT	CNPY3-GNMT	0	intron	42972935	A	G	1.85922e-143	0.932244	13415.5	0.375	Protein quantitative trait loci (liver)	.	7e-20
chr6:42959499-42959540	AG	GNMT	CNPY3-GNMT	CNPY3-GNMT	0	intron	42951484	T	C	4.19514e-144	0.933072	8035.5	0.377	LDL cholesterol levels	GNMT	1e-09
chr6:42959499-42959540	AG	GNMT	CNPY3-GNMT	CNPY3-GNMT	0	intron	42972935	A	G	1.85922e-143	0.932244	13415.5	0.375	Hematocrit	PEX6	1e-09
chr6:78606947-78606992	ATGG	.	.	MIR10524	67639	.	78606513	T	C	1.04669e-137	0.923603	456.5	0.4531	Educational attainment (years of education)	.	3e-08
chr7:124971785-124971817	GT	.	POT1-AS1	POT1-AS1	0	intron	124959695	A	G	1.99778e-118	0.889922	12106	0.4898	Leukocyte telomere length	POT1	2e-11
chr7:124971785-124971817	GT	.	POT1-AS1	POT1-AS1	0	intron	124959695	A	G	1.99778e-118	0.889922	12106	0.4898	Leukocyte telomere length	POT1	3e-10
chr7:12804266-12804291	GTT	.	.	ARL4A	113309	.	12807834	G	A	5.40064e-149	0.938311	3555.5	0.2694	Metabolite levels	SCIN	5e-07
chr7:99144016-99144048	CCG	SMURF1	SMURF1	SMURF1	0	5utr	99158974	C	T	1.15271e-86	0.800458	14942	0.2807	Eosinophil counts	.	6e-13
chr7:99144016-99144048	CCG	SMURF1	SMURF1	SMURF1	0	5utr	99161494	C	A	1.76492e-92	0.821342	17462	0.2746	Inflammatory bowel disease	SMURF1	8e-12
chr7:99144016-99144048	CCG	SMURF1	SMURF1	SMURF1	0	5utr	99158974	C	T	1.15271e-86	0.800458	14942	0.2807	Educational attainment (MTAG)	Intergenic	4e-10
chr7:99144016-99144048	CCG	SMURF1	SMURF1	SMURF1	0	5utr	99158974	C	T	1.15271e-86	0.800458	14942	0.2807	Educational attainment (years of education)	.	6e-10
chr7:99144016-99144048	CCG	SMURF1	SMURF1	SMURF1	0	5utr	99161494	C	A	1.76492e-92	0.821342	17462	0.2746	Inflammatory bowel disease	KPNA7, SMURF1	8e-09
chr7:99144016-99144048	CCG	SMURF1	SMURF1	SMURF1	0	5utr	99161494	C	A	1.76492e-92	0.821342	17462	0.2746	Chronic inflammatory diseases (ankylosing spondylitis, Crohn's disease, psoriasis, primary sclerosing cholangitis, ulcerative colitis) (pleiotropy)	intergenic	1e-08
chr7:99144016-99144048	CCG	SMURF1	SMURF1	SMURF1	0	5utr	99161494	C	A	1.76492e-92	0.821342	17462	0.2746	Crohn's disease	.	4e-08
chr7:99144016-99144048	CCG	SMURF1	SMURF1	SMURF1	0	5utr	99161494	C	A	1.76492e-92	0.821342	17462	0.2746	Ulcerative colitis	.	4e-07
chr7:99144016-99144048	CCG	SMURF1	SMURF1	SMURF1	0	5utr	99161494	C	A	1.76492e-92	0.821342	17462	0.2746	Ulcerative colitis	KPNA7, SMURF1	7e-07
chr7:99144016-99144048	CCG	SMURF1	SMURF1	SMURF1	0	5utr	99171402	G	T	2.921e-105	0.858749	27370	0.2633	Allergic disease (asthma, hay fever or eczema)	AC004893.11	8e-07
chr8:142469158-142469181	GT	.	ADGRB1	ADGRB1	0	intron	142479537	T	C	1.15787e-143	0.934757	10367.5	0.1612	General cognitive ability	.	2e-07
chr8:27774167-27774193	ATTT	CCDC25,ESCO2	.	ESCO2	361	.	27772635	G	A	3.38121e-102	0.850311	1545	0.4571	Height	CCDC25	1e-11
chr8:54170135-54170157	GT	.	.	MRPL15	21622	.	54172222	T	C	1.64428e-95	0.830104	2076	0.3898	Pelvic organ prolapse (moderate/severe)	CHCHD2P10, LYPLA1	7e-06
chr9:114930603-114930640	GT	TNFSF8	.	TNFSF8	9	.	114928478	T	C	1.20193e-89	0.810154	2143.5	0.4857	Eosinophil counts	.	6e-31
chr9:114930603-114930640	GT	TNFSF8	.	TNFSF8	9	.	114928478	T	C	1.20193e-89	0.810154	2143.5	0.4857	Eosinophil percentage of granulocytes	TNFSF8	1e-13
chr9:114930603-114930640	GT	TNFSF8	.	TNFSF8	9	.	114928478	T	C	1.20193e-89	0.810154	2143.5	0.4857	Eosinophil percentage of white cells	TNFSF8	5e-13
chr9:114930603-114930640	GT	TNFSF8	.	TNFSF8	9	.	114928478	T	C	1.20193e-89	0.810154	2143.5	0.4857	Neutrophil percentage of granulocytes	TNFSF8	5e-13
chr9:125885799-125885819	GT	.	PBX3	PBX3	0	intron	125907900	A	G	7.86698e-94	0.824613	22091	0.3408	Raw vegetable consumption	MAPKAP1, PBX3	4e-09
chr9:125885799-125885819	GT	.	PBX3	PBX3	0	intron	125897928	C	T	1.75524e-91	0.817921	12119	0.3873	Squamous cell lung carcinoma	PBX3	9e-06
chr9:125970219-125970277	GT	.	.	PBX3	2844	.	125984333	A	G	6.76397e-119	0.890898	14085	0.3163	Medication use (opioids)	PBX3	8e-10
